# Supplementary material for: Microbial Community Composition and Antibiotic Resistance Genes Within a North Carolina Urban Water System
Source: Preprints.org preprint supplement (doi:10.20944/preprints201809.0255.v1), 2018-09-14
Supplement: Supplementary file 1 [file supplementary]

Archive with 6 entries (6 files):
- LODLOQcorrectionvalues_suppfile1.xlsx
- mass_spec_curves_suppfile5.zip
- mass_spec_stats_suppfile2.xlsx
- metaphlan_species_stats_suppfile3.xlsx
- shortbred_stats_suppfile4.xlsx
- water_supp_info.pdf
