# Supplementary material for: Microbial Community Composition and Antibiotic Resistance Genes Within a North Carolina Urban Water System
Source: Preprints.org preprint supplement (doi:10.20944/preprints201809.0255.v1), 2018-09-14
Supplement: Supplementary file 1 [file supplementary]

## Sheet: metaphlan_species_stats_suppfil
ATE_FCE	indexes	pValuesSource	pValuesLocation	pValuesTimepoint	pValuesSourceAdjusted	pValuesLocationAdjusted	pValuesTimepointAdjusted
M.Methanobrevibacter_smithii	1	0.985987	0.0153336	0.134711	0.985987	0.130336	0.297981
M.Methanobrevibacter_unclassified	2	0.135317	0.634527	0.510056	0.298515	0.762715	0.634087
G.Gordonia_amarae	3	0.0461922	0.395977	0.736173	0.152691	0.58186	0.796405
T.Tetrasphaera_elongata	4	0.0171566	0.00274606	0.913686	0.0996214	0.0810322	0.916147
L.Leifsonia_unclassified	5	0.427016	0.813256	0.721802	0.60494	0.879795	0.788022
L.Leucobacter_unclassified	6	0.434662	0.0665482	0.783978	0.608527	0.226933	0.832977
N.Nakamurella_multipartita	7	0.122134	0.132697	0.530068	0.292454	0.32065	0.643654
R.Rhodococcus_erythropolis	8	0.210692	0.118248	0.153773	0.397973	0.305902	0.317467
N.Nocardioides_unclassified	9	0.206616	0.538369	0.00610377	0.397721	0.681552	0.0290539
B.Bifidobacterium_adolescentis	10	0.0062593	0.402629	0.021132	0.0677143	0.58186	0.0785847
B.Bifidobacterium_longum	11	0.101066	0.7567	0.00469014	0.273337	0.849502	0.0256031
C.Collinsella_aerofaciens	12	0.768323	0.806577	0.170658	0.879139	0.879795	0.340593
B.Bacteroides_caccae	13	0.0626399	0.613661	8.81e-05	0.186354	0.758102	0.00298104
B.Bacteroides_dorei	14	0.03465	0.501717	0.000474043	0.123577	0.641982	0.00438305
B.Bacteroides_eggerthii	15	0.140006	0.38715	0.0899697	0.302921	0.58186	0.254914
B.Bacteroides_massiliensis	16	0.179517	0.217734	0.000100203	0.362077	0.411276	0.00298104
B.Bacteroides_ovatus	17	0.104978	0.617949	0.000190617	0.277609	0.758102	0.00389595
B.Bacteroides_stercoris	18	0.0247167	0.693818	5.38e-06	0.108937	0.793888	0.000640792
B.Bacteroides_thetaiotaomicron	19	0.0340921	0.659126	0.000519346	0.123577	0.780397	0.00438305
B.Bacteroides_uniformis	20	0.0213467	0.670632	0.000552485	0.10161	0.782405	0.00438305
B.Bacteroides_vulgatus	21	0.0173556	0.462933	0.000338762	0.0996214	0.626012	0.00438305
B.Bacteroides_xylanisolvens	22	0.151187	0.397879	0.0199992	0.321273	0.58186	0.076771
D.Dysgonomonas_mossii	23	0.850377	0.0873313	0.511532	0.912646	0.255954	0.634087
P.Parabacteroides_distasonis	24	0.0322092	0.39604	9.55e-05	0.123577	0.58186	0.00298104
P.Parabacteroides_merdae	25	0.275765	0.493588	0.000196435	0.470057	0.641982	0.00389595
P.Parabacteroides_unclassified	26	0.557775	0.125885	0.137348	0.68682	0.318729	0.297981
P.Prevotella_copri	27	0.0794754	0.162582	0.000387979	0.22518	0.356571	0.00438305
P.Prevotella_paludivivens	28	0.283984	0.0282837	0.0026274	0.470057	0.138714	0.0183918
A.Alistipes_onderdonkii	29	0.0585829	0.375572	0.00744624	0.178753	0.58186	0.0340809
A.Alistipes_putredinis	30	0.0108281	0.412627	0.000247441	0.0889738	0.58186	0.00420651
C.Chryseobacterium_gleum	31	0.459	0.747776	0.481188	0.615649	0.847479	0.626468
C.Chryseobacterium_unclassified	32	0.533544	0.965203	0.563894	0.675444	0.981702	0.677811
M.Myroides_unclassified	33	0.000800231	0.00773164	0.773781	0.060141	0.0906731	0.829549
R.Riemerella_unclassified	34	0.0312791	0.0207524	0.30837	0.123577	0.137196	0.489667
F.Flavobacteria_bacterium_BAL38	35	0.0205184	0.0364465	0.591249	0.10161	0.154898	0.689791
P.Pedobacter_unclassified	36	0.358302	0.174176	0.311103	0.539721	0.360887	0.489667
S.Streptococcus_salivarius	37	0.848806	0.911674	0.312204	0.912646	0.943384	0.489667
E.Eubacterium_rectale	38	0.610171	0.237737	0.00232092	0.726103	0.435241	0.0172618
B.Ruminococcus_obeum	39	0.133878	0.662354	0.000505577	0.298515	0.780397	0.00438305
B.Ruminococcus_torques	40	0.661275	0.416029	0.333333	0.763997	0.58186	0.50211
D.Dorea_unclassified	41	0.0557422	0.178927	0.108878	0.174561	0.360887	0.278884
R.Roseburia_unclassified	42	0.284404	0.0796076	0.00473334	0.470057	0.255954	0.0256031
P.Peptostreptococcaceae_noname_unclassified	43	0.790793	0.688514	0.517957	0.887777	0.793888	0.635432
F.Faecalibacterium_prausnitzii	44	0.0813976	0.0576561	0.000500554	0.225263	0.214409	0.00438305
R.Ruminococcus_bromii	45	0.0112152	0.288381	0.00334706	0.0889738	0.519961	0.0221278
S.Subdoligranulum_unclassified	46	0.1253	0.0667451	0.00501676	0.292454	0.226933	0.0259563
A.Acidaminococcus_unclassified	47	0.30712	0.79162	0.0282962	0.493882	0.872248	0.0990366
D.Dialister_invisus	48	0.116311	0.901346	0.0130221	0.292454	0.940878	0.0516542
M.Megamonas_unclassified	49	0.00439957	0.333827	0.00399032	0.0654435	0.544184	0.0237424
M.Mitsuokella_unclassified	50	0.784063	0.311687	0.211649	0.887777	0.528586	0.399781
N.Candidatus_Nitrospira_defluvii	51	0.0186834	0.186878	0.139662	0.10106	0.370642	0.297981
B.Brevundimonas_unclassified	52	0.160949	0.0903366	0.498379	0.336016	0.255954	0.630927
C.Caulobacter_unclassified	53	0.0707638	0.0888809	0.46515	0.205388	0.255954	0.615031
C.Caulobacter_vibrioides	54	0.0175802	0.0475772	0.381986	0.0996214	0.188723	0.554345
A.Afipia_broomeae	55	0.125337	0.496669	0.690236	0.292454	0.641982	0.767646
A.Afipia_clevelandensis	56	0.00623106	0.0265327	0.830393	0.0677143	0.138714	0.874485
A.Afipia_unclassified	57	0.00216833	0.0653473	0.570481	0.0654435	0.226933	0.678872
R.Rhodopseudomonas_palustris	58	0.0316389	0.997441	0.177559	0.123577	0.997441	0.340798
R.Rhodopseudomonas_unclassified	59	0.311696	0.0951113	0.315147	0.494557	0.263215	0.489667
H.Hyphomicrobium_denitrificans	60	0.00781069	0.631909	0.0417863	0.077456	0.762715	0.134394
H.Hyphomicrobium_unclassified	61	0.00305993	0.485939	0.0308995	0.0654435	0.641982	0.105058
M.Mesorhizobium_unclassified	62	0.0106148	0.996583	0.0622759	0.0889738	0.997441	0.190021
P.Paracoccus_unclassified	63	0.0159378	0.101942	0.64199	0.0996214	0.275706	0.731605
R.Reyranella_massiliensis	64	0.0121389	0.398656	0.109257	0.0902834	0.58186	0.278884
H.Holospora_unclassified	65	0.971656	0.0540836	0.17459	0.979891	0.207611	0.340593
B.Blastomonas_unclassified	66	0.324525	0.351935	0.379454	0.508137	0.56595	0.554345
S.Sphingobium_unclassified	67	0.372504	0.300263	0.445901	0.554099	0.528586	0.60991
S.Sphingobium_xenophagum	68	0.0362859	0.0047666	0.861447	0.123577	0.0810322	0.89923
S.Sphingopyxis_unclassified	69	0.00101077	0.0855726	0.173234	0.060141	0.255954	0.340593
C.Candidatus_Accumulibacter_phosphatis	70	0.0363462	0.0288189	0.685212	0.123577	0.138714	0.767646
B.Bordetella_unclassified	71	0.522587	0.108607	0.105067	0.672438	0.287206	0.278884
P.Polynucleobacter_necessarius	72	0.559845	0.0262378	0.110981	0.68682	0.138714	0.278884
R.Ralstonia_unclassified	73	0.920405	0.167798	0.489803	0.952419	0.356571	0.626737
T.Thiomonas_unclassified	74	0.854093	0.210348	0.418911	0.912646	0.403733	0.593457
A.Alicycliphilus_denitrificans	75	0.0484288	0.0306912	0.88019	0.155758	0.138714	0.902953
A.Alicycliphilus_unclassified	76	0.00431467	0.234185	0.28528	0.0654435	0.435241	0.478146
C.Comamonas_testosteroni	77	0.332868	0.312675	0.116024	0.514432	0.528586	0.281772
C.Comamonas_unclassified	78	0.871085	0.319817	0.44043	0.917338	0.528586	0.60991
L.Limnohabitans_unclassified	79	0.280133	0.0289848	0.266769	0.470057	0.138714	0.477715
P.Polaromonas_unclassified	80	0.00530511	0.158171	0.281128	0.0677143	0.355138	0.478146
V.Variovorax_unclassified	81	0.0269451	0.318764	0.347039	0.114517	0.528586	0.51622
V.Verminephrobacter_unclassified	82	0.275013	0.406296	0.0855249	0.470057	0.58186	0.248231
A.Aquaspirillum_serpens	83	0.00368971	0.0186192	0.451093	0.0654435	0.133337	0.610001
L.Laribacter_hongkongensis	84	0.525519	0.176343	0.154732	0.672438	0.360887	0.317467
A.Azoarcus_unclassified	85	0.541487	0.128718	0.303598	0.678283	0.319114	0.489667
D.Dechloromonas_aromatica	86	0.232052	0.138398	0.459719	0.431472	0.322929	0.614681
M.Methyloversatilis_unclassified	87	0.28189	0.447421	0.916147	0.470057	0.611989	0.916147
T.Thauera_aminoaromatica	88	0.0200461	0.00853718	0.442589	0.10161	0.0906731	0.60991
T.Thauera_unclassified	89	0.291031	5.25e-06	0.581619	0.474421	0.00062432	0.685273
D.Desulfovibrio_desulfuricans	90	0.940597	0.0078666	0.268965	0.964923	0.0906731	0.477715
S.Sorangium_cellulosum	91	0.122447	0.501086	0.878451	0.292454	0.641982	0.902953
A.Arcobacter_butzleri	92	0.58256	0.784036	0.00601449	0.700249	0.871966	0.0290539
A.Arcobacter_unclassified	93	0.418465	0.850343	0.00369158	0.599968	0.904522	0.0231209
A.Aeromonas_aquariorum	94	0.135461	0.0445824	0.230142	0.298515	0.182941	0.421337
A.Aeromonas_caviae	95	0.805071	0.00423192	0.0107063	0.895359	0.0810322	0.0439327
A.Aeromonas_hydrophila	96	0.172413	0.0106445	0.914585	0.353743	0.0974385	0.916147
A.Aeromonas_media	97	0.660689	0.031473	0.0511227	0.763997	0.138714	0.160095
A.Aeromonas_unclassified	98	0.351484	0.00202978	0.0077828	0.536238	0.0810322	0.034302
A.Aeromonas_veronii	99	0.25907	0.0190481	0.7077	0.467112	0.133337	0.77978
T.Tolumonas_auensis	100	0.885354	0.0304323	0.000431192	0.924185	0.138714	0.00438305
C.Citrobacter_freundii	101	0.820692	0.851315	0.0402645	0.904281	0.904522	0.133096
C.Citrobacter_unclassified	102	0.460443	0.919912	0.387266	0.615649	0.943703	0.555237
E.Enterobacter_cloacae	103	0.514438	0.0236113	0.140226	0.672438	0.138714	0.297981
E.Escherichia_unclassified	104	0.201604	0.16646	0.645533	0.397721	0.356571	0.731605
K.Klebsiella_oxytoca	105	0.453329	0.0694392	0.122667	0.615649	0.229535	0.288095
K.Klebsiella_pneumoniae	106	0.959903	0.0039504	0.076246	0.976312	0.0810322	0.226832
K.Klebsiella_unclassified	107	0.392611	0.304366	0.318823	0.576798	0.528586	0.489667
A.Acinetobacter_bouvetii	108	0.441394	0.0190195	0.320958	0.610766	0.133337	0.489667
A.Acinetobacter_johnsonii	109	0.207216	0.420504	0.228173	0.397721	0.58186	0.421337
A.Acinetobacter_parvus	110	0.112595	0.56005	0.00962728	0.291279	0.701537	0.0409159
A.Acinetobacter_tjernbergiae	111	0.656906	0.00914351	0.12589	0.763997	0.0906731	0.288095
A.Acinetobacter_towneri	112	0.467721	0.155402	0.125191	0.618431	0.355138	0.288095
A.Acinetobacter_unclassified	113	0.412452	0.00383608	0.0255647	0.598559	0.0810322	0.0921879
E.Enhydrobacter_aerosaccus	114	0.858961	0.38894	0.112491	0.912646	0.58186	0.278884
P.Pseudomonas_unclassified	115	0.0159668	0.0863724	0.628306	0.0996214	0.255954	0.725907
T.Thiothrix_unclassified	116	0.570406	0.00547586	0.281836	0.692636	0.0814535	0.478146
P.Pseudoxanthomonas_unclassified	117	0.256275	0.134727	0.484328	0.467112	0.32065	0.626468
T.Turneriella_parva	118	0.00287434	0.899058	0.112455	0.0654435	0.940878	0.278884
A.Akkermansia_muciniphila	119	0.0234204	0.193562	0.273467	0.107193	0.377605	0.478146
DSA_DSB	indexes	pValuesSource	pValuesLocation	pValuesTimepoint	pValuesSourceAdjusted	pValuesLocationAdjusted	pValuesTimepointAdjusted
A.actinobacterium_SCGC_AAA024_D14	1	0.938287	0.0835525	0.31305	0.938287	0.500021	0.458399
A.actinobacterium_SCGC_AAA027_L06	2	0.608267	0.37114	0.684586	0.837666	0.839295	0.742416
A.actinobacterium_SCGC_AAA028_A23	3	0.424437	0.458543	0.719215	0.837666	0.839295	0.742416
A.actinobacterium_SCGC_AAA044_N04	4	0.914381	0.100363	0.102069	0.928895	0.500021	0.251246
A.actinobacterium_SCGC_AAA278_O22	5	0.895325	0.10334	0.300146	0.928895	0.500021	0.458399
B.Brevibacterium_unclassified	6	0.245182	0.10938	0.0950578	0.837666	0.500021	0.243348
T.Tetrasphaera_elongata	7	0.629737	0.0103199	0.175302	0.837666	0.220157	0.373977
L.Leifsonia_unclassified	8	0.491536	0.949302	0.43508	0.837666	0.979925	0.556903
R.Rhodococcus_erythropolis	9	0.629797	0.698586	0.136834	0.837666	0.928829	0.312763
N.Nocardioides_unclassified	10	0.525962	0.118926	0.343116	0.837666	0.507419	0.477378
B.Bacteroides_uniformis	11	0.53094	0.647772	0.42926	0.837666	0.928829	0.556903
B.Bacteroides_vulgatus	12	0.480739	0.603458	0.566207	0.837666	0.919554	0.635741
P.Prevotella_copri	13	0.353431	0.568542	0.44726	0.837666	0.908981	0.557938
P.Prevotella_paludivivens	14	0.172175	0.80145	0.0156738	0.837666	0.928829	0.0646457
M.Myroides_unclassified	15	0.79252	0.893679	0.0126048	0.867866	0.954673	0.0576222
R.Riemerella_unclassified	16	0.457005	0.724035	0.00253514	0.837666	0.928829	0.0202811
F.Flavobacteria_bacterium_BAL38	17	0.81321	0.02748	0.0293766	0.867866	0.351744	0.110594
P.Pedobacter_unclassified	18	0.0846697	0.178432	0.0312034	0.837666	0.570983	0.110945
C.Cyanobium_unclassified	19	0.533078	0.163173	0.19089	0.837666	0.570983	0.394094
D.Deinococcus_unclassified	20	0.101522	0.770005	0.000787992	0.837666	0.928829	0.00840525
E.Eubacterium_rectale	21	0.603493	0.410319	0.52526	0.837666	0.839295	0.611211
P.Peptostreptococcaceae_noname_unclassified	22	0.19428	0.054448	0.0455096	0.837666	0.435584	0.145631
S.Subdoligranulum_unclassified	23	0.813625	0.159949	0.322312	0.867866	0.570983	0.458399
A.alpha_proteobacterium_SCGC_AAA027_J10	24	0.534794	0.996142	0.00303888	0.837666	0.996142	0.0216098
B.Brevundimonas_unclassified	25	0.0934468	0.221616	0.261859	0.837666	0.644702	0.453177
C.Caulobacter_unclassified	26	0.343457	0.442096	0.535998	0.837666	0.839295	0.612569
C.Caulobacter_vibrioides	27	0.315558	0.895006	0.747511	0.837666	0.954673	0.759377
A.Afipia_unclassified	28	0.663095	0.171232	0.0620206	0.837666	0.570983	0.172579
R.Rhodopseudomonas_palustris	29	0.351982	0.582316	0.476488	0.837666	0.908981	0.564727
R.Rhodopseudomonas_unclassified	30	0.0103886	0.740262	0.14199	0.437884	0.928829	0.313357
P.Paracoccus_unclassified	31	0.208953	0.791185	0.00447078	0.837666	0.928829	0.0260118
R.Reyranella_massiliensis	32	0.797783	0.50157	0.462042	0.867866	0.890153	0.557938
H.Holospora_unclassified	33	0.905571	0.000822894	0.715307	0.928895	0.0526652	0.742416
S.Sphingobium_unclassified	34	0.227489	0.458989	0.00223274	0.837666	0.839295	0.0202811
S.Sphingopyxis_unclassified	35	0.269072	0.39635	0.456319	0.837666	0.839295	0.557938
B.Bordetella_unclassified	36	0.695863	0.922503	0.0121006	0.837666	0.967872	0.0576222
B.Burkholderia_unclassified	37	0.67357	0.778112	0.320199	0.837666	0.928829	0.458399
P.Polynucleobacter_necessarius	38	0.4061	0.51462	0.0575955	0.837666	0.890153	0.171295
R.Ralstonia_unclassified	39	0.593302	0.199265	0.261954	0.837666	0.607284	0.453177
T.Thiomonas_unclassified	40	0.474579	0.791709	0.130338	0.837666	0.928829	0.30895
A.Alicycliphilus_unclassified	41	0.706781	0.283983	0.0161614	0.837666	0.735815	0.0646457
C.Comamonas_unclassified	42	0.687145	0.341537	0.393013	0.837666	0.809569	0.535166
L.Limnohabitans_unclassified	43	0.374804	0.568465	0.00013845	0.837666	0.908981	0.00295359
P.Polaromonas_unclassified	44	0.440829	0.0974837	0.000108662	0.837666	0.500021	0.00295359
V.Variovorax_unclassified	45	0.591252	0.790686	0.00047602	0.837666	0.928829	0.0063091
J.Janthinobacterium_unclassified	46	0.36266	0.0775193	0.00854627	0.837666	0.500021	0.0455801
M.Massilia_unclassified	47	0.10242	0.0503003	0.000492899	0.837666	0.435584	0.0063091
M.Methylotenera_unclassified	48	0.147889	0.570059	0.322101	0.837666	0.908981	0.458399
M.Methylotenera_versatilis	49	0.132932	0.445594	0.700951	0.837666	0.839295	0.742416
A.Azoarcus_unclassified	50	0.152797	0.00664045	0.21782	0.837666	0.212494	0.42244
D.Dechloromonas_aromatica	51	0.622142	0.333747	0.0588826	0.837666	0.809569	0.171295
M.Methyloversatilis_unclassified	52	0.664188	0.0168231	0.269074	0.837666	0.26917	0.453177
T.Thauera_unclassified	53	0.810363	0.0371698	0.310639	0.867866	0.396478	0.458399
A.Arcobacter_unclassified	54	0.122598	0.438961	0.000124329	0.837666	0.839295	0.00295359
A.Aeromonas_unclassified	55	0.559634	0.827238	0.405153	0.837666	0.928829	0.540204
E.Escherichia_unclassified	56	0.466445	0.995164	0.834664	0.837666	0.996142	0.834664
R.Rickettsiella_grylli	57	0.729896	0.738579	0.0366905	0.849333	0.928829	0.123589
A.Acinetobacter_johnsonii	58	0.278711	0.641579	0.261148	0.837666	0.928829	0.453177
A.Acinetobacter_unclassified	59	0.245303	0.718589	0.00442824	0.837666	0.928829	0.0260118
E.Enhydrobacter_aerosaccus	60	0.323358	0.287428	0.303784	0.837666	0.735815	0.458399
C.Cellvibrio_unclassified	61	0.0136839	0.176246	0.201378	0.437884	0.570983	0.402756
P.Pseudomonas_unclassified	62	0.264013	0.28405	0.653028	0.837666	0.735815	0.720583
B.Bppunalikevirus_unclassified	63	0.623576	0.866298	0.0887448	0.837666	0.954673	0.236653
Y.Yualikevirus_unclassified	64	0.647733	0.813754	0.266912	0.837666	0.928829	0.453177
FCE_DSA	indexes	pValuesSource	pValuesLocation	pValuesTimepoint	pValuesSourceAdjusted	pValuesLocationAdjusted	pValuesTimepointAdjusted
M.Methanobrevibacter_smithii	1	0.00113841	0.310484	0.306776	0.0122949	0.670882	0.573237
A.actinobacterium_SCGC_AAA024_D14	2	0.116506	0.233877	0.545645	0.146309	0.601398	0.673847
A.actinobacterium_SCGC_AAA027_L06	3	0.0233176	0.449887	0.660119	0.050366	0.759184	0.734978
A.actinobacterium_SCGC_AAA028_A23	4	0.0211382	0.393335	0.731645	0.0465902	0.742566	0.782353
A.actinobacterium_SCGC_AAA044_N04	5	0.300309	0.319622	0.445397	0.337848	0.670882	0.673847
A.actinobacterium_SCGC_AAA278_O22	6	0.0839474	0.125944	0.543747	0.117744	0.558116	0.673847
G.Gordonia_amarae	7	0.0244218	0.130656	0.653637	0.0509322	0.558116	0.734978
T.Tetrasphaera_elongata	8	0.0423295	0.0050766	0.547532	0.0703321	0.274136	0.673847
A.Agromyces_unclassified	9	0.174933	0.58164	0.810106	0.21227	0.829161	0.841264
L.Leifsonia_unclassified	10	0.455674	0.426517	0.67406	0.477794	0.742966	0.742842
L.Leucobacter_unclassified	11	0.534032	0.282704	0.445234	0.554572	0.649617	0.673847
R.Rhodococcus_erythropolis	12	0.0380899	0.938927	0.373396	0.0663502	0.956642	0.661095
N.Nocardioides_unclassified	13	0.396792	0.985379	0.190076	0.437281	0.985379	0.475757
B.Bifidobacterium_adolescentis	14	0.0019258	0.423992	0.285634	0.0148562	0.742966	0.573237
B.Bifidobacterium_longum	15	0.000520325	0.574113	0.130115	0.00702438	0.829161	0.436595
C.Collinsella_aerofaciens	16	0.00565717	0.6119	0.427913	0.0277716	0.835426	0.673847
B.Bacteroides_caccae	17	0.0481334	0.707741	0.10065	0.0755157	0.838598	0.436595
B.Bacteroides_dorei	18	0.0246264	0.821979	0.125835	0.0509322	0.87033	0.436595
B.Bacteroides_massiliensis	19	0.0878641	0.560402	0.115086	0.121225	0.829161	0.436595
B.Bacteroides_ovatus	20	0.0346264	0.697149	0.141489	0.0644061	0.836578	0.436595
B.Bacteroides_stercoris	21	0.011171	0.671946	0.0780289	0.0402864	0.835426	0.436595
B.Bacteroides_thetaiotaomicron	22	0.0359163	0.791924	0.102147	0.0644061	0.856899	0.436595
B.Bacteroides_uniformis	23	0.0155868	0.766038	0.0872735	0.0420844	0.852908	0.436595
B.Bacteroides_vulgatus	24	0.00327119	0.460301	0.0599481	0.0185941	0.76184	0.436595
B.Bacteroides_xylanisolvens	25	0.0965138	0.397703	0.193827	0.128685	0.742566	0.475757
P.Parabacteroides_distasonis	26	0.031509	0.586607	0.0919517	0.0597012	0.829161	0.436595
P.Parabacteroides_merdae	27	0.0928248	0.74219	0.147695	0.125314	0.838598	0.443085
P.Prevotella_copri	28	0.0310178	0.465569	0.129447	0.0597012	0.76184	0.436595
P.Prevotella_paludivivens	29	0.0249945	0.280441	0.119881	0.0509322	0.649617	0.436595
A.Alistipes_putredinis	30	0.01504	0.851394	0.070726	0.0419881	0.891778	0.436595
C.Chryseobacterium_gleum	31	0.159265	0.662301	0.608474	0.197709	0.835426	0.714295
C.Chryseobacterium_unclassified	32	0.114391	0.638592	0.532424	0.145344	0.835426	0.673847
M.Myroides_unclassified	33	0.0401235	0.0136005	0.445046	0.0687832	0.367215	0.673847
R.Riemerella_unclassified	34	0.00159751	0.0454038	0.117338	0.0146463	0.544845	0.436595
F.Flavobacteria_bacterium_BAL38	35	0.0188544	0.035365	0.528369	0.044267	0.507376	0.673847
P.Pedobacter_unclassified	36	0.180254	0.421357	0.549061	0.213928	0.742966	0.673847
S.Streptococcus_salivarius	37	0.0263579	0.329229	0.186019	0.0527159	0.670882	0.475757
E.Eubacterium_rectale	38	0.0735616	0.411608	0.079708	0.105929	0.742966	0.436595
B.Ruminococcus_obeum	39	0.0151624	0.957539	0.0857602	0.0419881	0.966488	0.436595
B.Ruminococcus_torques	40	0.010529	0.646686	0.120578	0.0402864	0.835426	0.436595
P.Peptostreptococcaceae_noname_unclassified	41	0.426645	0.0254097	0.0278201	0.465431	0.507376	0.436595
F.Faecalibacterium_prausnitzii	42	0.0759174	0.140167	0.152967	0.107883	0.558116	0.446499
R.Ruminococcus_bromii	43	0.0174837	0.687762	0.108514	0.0433179	0.835426	0.436595
S.Subdoligranulum_unclassified	44	0.0363775	0.134497	0.00315206	0.0644061	0.558116	0.340423
M.Megamonas_unclassified	45	0.0025556	0.324999	0.171854	0.0172503	0.670882	0.465029
M.Mitsuokella_unclassified	46	0.442035	0.590516	0.713916	0.468038	0.829161	0.771029
N.Candidatus_Nitrospira_defluvii	47	0.0622859	0.398786	0.509044	0.0934289	0.742566	0.673847
B.Brevundimonas_unclassified	48	0.206228	0.206228	0.562466	0.23949	0.573176	0.68136
C.Caulobacter_unclassified	49	0.070183	0.0866533	0.4495	0.102429	0.558116	0.673847
C.Caulobacter_vibrioides	50	0.0144091	0.0349477	0.285802	0.0419881	0.507376	0.573237
A.Afipia_clevelandensis	51	0.276176	0.226445	0.171904	0.313969	0.596488	0.465029
A.Afipia_unclassified	52	0.00312108	0.107201	0.294531	0.0185941	0.558116	0.573237
R.Rhodopseudomonas_palustris	53	0.103083	0.1602	0.433777	0.134133	0.558116	0.673847
H.Hyphomicrobium_denitrificans	54	0.0170044	0.375788	0.200097	0.0433179	0.737911	0.480234
H.Hyphomicrobium_unclassified	55	0.0352073	0.551446	0.0617319	0.0644061	0.829161	0.436595
P.Paracoccus_unclassified	56	0.907407	0.793425	0.5678	0.907407	0.856899	0.68136
R.Reyranella_massiliensis	57	0.0121818	0.206743	0.623496	0.0402864	0.573176	0.72406
H.Holospora_unclassified	58	0.0587298	0.089724	0.486607	0.0895121	0.558116	0.673847
S.Sphingobium_unclassified	59	0.0441554	0.121963	0.104745	0.0722542	0.558116	0.436595
S.Sphingobium_xenophagum	60	0.22452	0.266704	0.648008	0.257959	0.64009	0.734978
S.Sphingopyxis_unclassified	61	3.24e-05	0.786583	0.463715	0.00116636	0.856899	0.673847
B.Bordetella_unclassified	62	0.376252	0.212287	0.176539	0.41892	0.573176	0.465029
B.Burkholderia_unclassified	63	0.69764	0.126314	0.97662	0.710803	0.558116	0.97662
P.Polynucleobacter_necessarius	64	2.01e-07	0.197948	0.279111	2.17e-05	0.573176	0.573237
R.Ralstonia_unclassified	65	0.85736	0.1093	0.534689	0.865373	0.558116	0.673847
T.Thiomonas_unclassified	66	0.436367	0.24124	0.887066	0.46661	0.605905	0.897912
A.Alicycliphilus_unclassified	67	0.0123097	0.210758	0.889598	0.0402864	0.573176	0.897912
C.Comamonas_testosteroni	68	0.0298136	0.176883	0.301061	0.0585431	0.573176	0.573237
C.Comamonas_unclassified	69	0.00807594	0.676936	0.0467786	0.0355866	0.835426	0.436595
L.Limnohabitans_unclassified	70	9.95e-06	0.637548	0.0901628	0.000537217	0.835426	0.436595
P.Polaromonas_unclassified	71	0.0678859	0.445163	0.288929	0.100434	0.759184	0.573237
V.Variovorax_unclassified	72	0.561629	0.865725	0.778728	0.577675	0.891778	0.81653
V.Verminephrobacter_unclassified	73	0.0588459	0.360199	0.0809183	0.0895121	0.720398	0.436595
H.Herbaspirillum_unclassified	74	0.206161	0.742797	0.392561	0.23949	0.838598	0.673847
J.Janthinobacterium_unclassified	75	0.176079	0.510478	0.247381	0.21227	0.798639	0.573237
M.Methylotenera_unclassified	76	0.00171633	0.204416	0.462195	0.0146463	0.573176	0.673847
A.Aquaspirillum_serpens	77	0.00433844	0.0637993	0.544785	0.022312	0.558116	0.673847
L.Laribacter_hongkongensis	78	0.011242	0.294926	0.140557	0.0402864	0.663585	0.436595
A.Azoarcus_unclassified	79	0.00823765	0.0113813	0.10581	0.0355866	0.367215	0.436595
D.Dechloromonas_aromatica	80	0.432448	0.489653	0.631699	0.46661	0.789291	0.725782
M.Methyloversatilis_unclassified	81	0.00890012	0.0606585	0.258938	0.0369697	0.558116	0.573237
T.Thauera_aminoaromatica	82	0.0469657	0.190203	0.36161	0.0755157	0.573176	0.650899
T.Thauera_unclassified	83	0.0184822	0.00335894	0.692506	0.044267	0.274136	0.755461
D.Desulfovibrio_desulfuricans	84	0.000124981	0.151339	0.440651	0.00337449	0.558116	0.673847
A.Arcobacter_butzleri	85	0.0065596	0.688453	0.0914042	0.0308016	0.835426	0.436595
A.Arcobacter_unclassified	86	0.00323984	0.745421	0.0256126	0.0185941	0.838598	0.436595
A.Aeromonas_aquariorum	87	0.0132329	0.199123	0.28155	0.0419881	0.573176	0.573237
A.Aeromonas_caviae	88	0.00220175	0.13488	0.17266	0.0158526	0.558116	0.465029
A.Aeromonas_hydrophila	89	0.0121639	0.0375834	0.539971	0.0402864	0.507376	0.673847
A.Aeromonas_media	90	0.0482462	0.159651	0.271199	0.0755157	0.558116	0.573237
A.Aeromonas_unclassified	91	0.00418524	0.102249	0.0848252	0.022312	0.558116	0.436595
A.Aeromonas_veronii	92	0.105448	0.105448	0.431474	0.135576	0.558116	0.673847
T.Tolumonas_auensis	93	0.0204203	0.509213	0.10217	0.0459457	0.798639	0.436595
C.Citrobacter_freundii	94	0.000795215	0.723691	0.098547	0.00954259	0.838598	0.436595
C.Citrobacter_unclassified	95	0.0149756	0.736227	0.477761	0.0419881	0.838598	0.673847
E.Enterobacter_cloacae	96	0.000252898	0.255023	0.0964988	0.0054626	0.625966	0.436595
E.Escherichia_unclassified	97	0.176892	0.60319	0.754071	0.21227	0.835186	0.798429
K.Klebsiella_pneumoniae	98	0.0886741	0.13042	0.520944	0.121225	0.558116	0.673847
K.Klebsiella_unclassified	99	0.00176298	0.679554	0.136131	0.0146463	0.835426	0.436595
A.Acinetobacter_johnsonii	100	0.0202807	0.591161	0.349051	0.0459457	0.829161	0.638941
A.Acinetobacter_parvus	101	0.000336062	0.867007	0.139209	0.00604912	0.891778	0.436595
A.Acinetobacter_tjernbergiae	102	0.100406	0.131147	0.535001	0.132242	0.558116	0.673847
A.Acinetobacter_unclassified	103	0.0160889	0.148185	0.30785	0.0423804	0.558116	0.573237
E.Enhydrobacter_aerosaccus	104	0.017648	0.517636	0.264774	0.0433179	0.798639	0.573237
P.Pseudomonas_unclassified	105	0.0146835	0.156836	0.847784	0.0419881	0.558116	0.872006
A.Akkermansia_muciniphila	106	0.000430571	0.681244	0.444003	0.00664309	0.835426	0.673847
B.Bppunalikevirus_unclassified	107	0.0411414	0.819903	0.439375	0.0694261	0.87033	0.673847
Y.Yualikevirus_unclassified	108	0.00953778	0.316514	0.598463	0.0381511	0.670882	0.710264
FCE_DSB	indexes	pValuesSource	pValuesLocation	pValuesTimepoint	pValuesSourceAdjusted	pValuesLocationAdjusted	pValuesTimepointAdjusted
M.Methanobrevibacter_smithii	1	0.00113841	0.310484	0.306776	0.0163647	0.727418	0.669976
A.actinobacterium_SCGC_AAA024_D14	2	0.0257156	0.290127	0.685625	0.0715872	0.727418	0.742719
A.actinobacterium_SCGC_AAA027_L06	3	0.0087822	0.614173	0.718991	0.0504976	0.833506	0.758569
A.actinobacterium_SCGC_AAA028_A23	4	0.00540388	0.799733	0.495918	0.0345248	0.867635	0.707431
A.actinobacterium_SCGC_AAA044_N04	5	0.187511	0.319013	0.501362	0.226987	0.727418	0.707431
A.actinobacterium_SCGC_AAA278_O22	6	0.028725	0.639624	0.619295	0.0715872	0.850626	0.719383
G.Gordonia_amarae	7	0.0244218	0.130656	0.653637	0.0715872	0.633863	0.724308
T.Tetrasphaera_elongata	8	0.0363206	0.00810738	0.390742	0.0775008	0.310783	0.707431
A.Agromyces_unclassified	9	0.801961	0.794833	0.545873	0.83086	0.867635	0.707431
L.Leifsonia_unclassified	10	0.93845	0.779643	0.784321	0.946682	0.867635	0.798203
L.Leucobacter_unclassified	11	0.339516	0.61607	0.0809611	0.390444	0.833506	0.57528
R.Rhodococcus_erythropolis	12	0.079321	0.405966	0.521395	0.121625	0.727418	0.707431
N.Nocardioides_unclassified	13	0.934276	0.667799	0.516164	0.946682	0.850626	0.707431
B.Bifidobacterium_adolescentis	14	0.0285065	0.440422	0.445123	0.0715872	0.755948	0.707431
B.Bifidobacterium_longum	15	0.0189614	0.344183	0.358487	0.0660775	0.727418	0.707431
C.Collinsella_aerofaciens	16	0.0866131	0.410889	0.574293	0.129083	0.727418	0.710148
B.Bacteroides_caccae	17	0.0481334	0.707741	0.10065	0.0840653	0.850626	0.57528
B.Bacteroides_dorei	18	0.0436288	0.720617	0.179553	0.0840653	0.850626	0.57528
B.Bacteroides_massiliensis	19	0.0878641	0.560402	0.115086	0.129083	0.833506	0.57528
B.Bacteroides_ovatus	20	0.0406118	0.687349	0.153432	0.0833992	0.850626	0.57528
B.Bacteroides_stercoris	21	0.0350327	0.555089	0.14544	0.0775008	0.833506	0.57528
B.Bacteroides_thetaiotaomicron	22	0.0359163	0.791924	0.102147	0.0775008	0.867635	0.57528
B.Bacteroides_uniformis	23	0.0298799	0.724881	0.150146	0.0715872	0.850626	0.57528
B.Bacteroides_vulgatus	24	0.0108296	0.500673	0.152235	0.0511557	0.833506	0.57528
B.Bacteroides_xylanisolvens	25	0.0965138	0.397703	0.193827	0.132132	0.727418	0.57528
P.Parabacteroides_distasonis	26	0.031509	0.586607	0.0919517	0.0726091	0.833506	0.57528
P.Parabacteroides_merdae	27	0.0928248	0.74219	0.147695	0.130181	0.86214	0.57528
P.Parabacteroides_unclassified	28	0.417986	0.598246	0.642039	0.471259	0.833506	0.724308
P.Prevotella_copri	29	0.0779462	0.411149	0.235885	0.121133	0.727418	0.616518
P.Prevotella_paludivivens	30	0.0464059	0.349359	0.111555	0.0840653	0.727418	0.57528
A.Alistipes_putredinis	31	0.0253625	0.929878	0.0969239	0.0715872	0.946336	0.57528
C.Chryseobacterium_gleum	32	0.160926	0.653623	0.596328	0.198995	0.850626	0.715967
C.Chryseobacterium_unclassified	33	0.120792	0.663302	0.54749	0.157853	0.850626	0.707431
M.Myroides_unclassified	34	0.0954769	0.0562519	0.476681	0.132132	0.633863	0.707431
R.Riemerella_unclassified	35	0.00173227	0.0664019	0.138028	0.0221346	0.633863	0.57528
F.Flavobacteria_bacterium_BAL38	36	0.0198569	0.0454017	0.541761	0.0670953	0.633863	0.707431
P.Pedobacter_unclassified	37	0.0315692	0.604921	0.648686	0.0726091	0.833506	0.724308
S.Streptococcus_salivarius	38	0.0263579	0.329229	0.186019	0.0715872	0.727418	0.57528
E.Eubacterium_rectale	39	0.201853	0.365471	0.367409	0.23931	0.727418	0.707431
B.Ruminococcus_obeum	40	0.0570384	0.78022	0.2349	0.0937059	0.867635	0.616518
B.Ruminococcus_torques	41	0.0919627	0.792885	0.369351	0.130181	0.867635	0.707431
D.Dorea_unclassified	42	0.926946	0.207769	0.753119	0.946682	0.702748	0.776641
R.Roseburia_unclassified	43	0.31648	0.311666	0.444136	0.367628	0.727418	0.707431
P.Peptostreptococcaceae_noname_unclassified	44	0.082449	0.042293	0.224438	0.124758	0.633863	0.616518
F.Faecalibacterium_prausnitzii	45	0.733099	0.21569	0.504947	0.773453	0.703295	0.707431
R.Ruminococcus_bromii	46	0.0907864	0.94845	0.350637	0.130181	0.95677	0.707431
S.Subdoligranulum_unclassified	47	0.14921	0.336556	0.402323	0.186512	0.727418	0.707431
A.Acidaminococcus_unclassified	48	0.124219	0.323449	0.171246	0.159912	0.727418	0.57528
M.Megamonas_unclassified	49	0.0025556	0.324999	0.171854	0.0227871	0.727418	0.57528
M.Mitsuokella_unclassified	50	0.373604	0.337399	0.655026	0.42539	0.727418	0.724308
N.Candidatus_Nitrospira_defluvii	51	0.0521999	0.433888	0.452783	0.0894441	0.755948	0.707431
B.Brevundimonas_unclassified	52	0.608538	0.912201	0.569496	0.666494	0.936635	0.710148
C.Caulobacter_unclassified	53	0.120416	0.152475	0.533256	0.157853	0.633863	0.707431
C.Caulobacter_vibrioides	54	0.0268903	0.0589366	0.41827	0.0715872	0.633863	0.707431
A.Afipia_unclassified	55	0.00326143	0.0909992	0.298395	0.0250043	0.633863	0.669976
R.Rhodopseudomonas_palustris	56	0.705091	0.297467	0.693734	0.759974	0.727418	0.742719
R.Rhodopseudomonas_unclassified	57	0.127142	0.603548	0.573539	0.160673	0.833506	0.710148
H.Hyphomicrobium_denitrificans	58	0.0170044	0.375788	0.200097	0.063081	0.727418	0.57528
H.Hyphomicrobium_unclassified	59	0.0231021	0.380124	0.13449	0.0715872	0.727418	0.57528
P.Paracoccus_unclassified	60	0.490485	0.380459	0.678497	0.547629	0.727418	0.742719
R.Reyranella_massiliensis	61	0.011822	0.156014	0.600697	0.0511557	0.633863	0.715967
H.Holospora_unclassified	62	0.0589102	0.0755326	0.447124	0.095418	0.633863	0.707431
S.Sphingobium_unclassified	63	0.0671732	0.132832	0.0453332	0.107291	0.633863	0.57528
S.Sphingobium_xenophagum	64	0.125148	0.153586	0.529141	0.159912	0.633863	0.707431
S.Sphingopyxis_unclassified	65	6.45e-05	0.881958	0.489018	0.00247249	0.91374	0.707431
B.Bordetella_unclassified	66	0.713715	0.538955	0.405542	0.759974	0.833506	0.707431
B.Burkholderia_unclassified	67	0.950606	0.373382	0.431324	0.950606	0.727418	0.707431
P.Polynucleobacter_necessarius	68	1.2e-06	0.712666	0.152485	0.00013757	0.850626	0.57528
R.Ralstonia_unclassified	69	0.708277	0.229511	0.756381	0.759974	0.713346	0.776641
T.Thiomonas_unclassified	70	0.249049	0.207373	0.69751	0.292252	0.702748	0.742719
A.Alicycliphilus_unclassified	71	0.0125527	0.115271	0.915396	0.0511557	0.633863	0.923425
C.Comamonas_testosteroni	72	0.0298136	0.176883	0.301061	0.0715872	0.656179	0.669976
C.Comamonas_unclassified	73	0.0695796	0.818002	0.520771	0.109612	0.875492	0.707431
L.Limnohabitans_unclassified	74	2.69e-05	0.822201	0.101195	0.00154919	0.875492	0.57528
P.Polaromonas_unclassified	75	0.175931	0.972881	0.308772	0.215235	0.972881	0.669976
V.Variovorax_unclassified	76	0.757481	0.3718	0.742325	0.791912	0.727418	0.776067
V.Verminephrobacter_unclassified	77	0.0457256	0.585173	0.196726	0.0840653	0.833506	0.57528
H.Herbaspirillum_unclassified	78	0.195265	0.611088	0.411036	0.233911	0.833506	0.707431
J.Janthinobacterium_unclassified	79	0.0371847	0.284208	0.234958	0.0777498	0.727418	0.616518
M.Massilia_unclassified	80	0.0528887	0.334159	0.113789	0.0894441	0.727418	0.57528
M.Methylotenera_unclassified	81	0.0225407	0.364696	0.423286	0.0715872	0.727418	0.707431
M.Methylotenera_versatilis	82	0.0127983	0.220162	0.603903	0.0511557	0.703295	0.715967
A.Aquaspirillum_serpens	83	0.00257594	0.0687241	0.519198	0.0227871	0.633863	0.707431
L.Laribacter_hongkongensis	84	0.011242	0.294926	0.140557	0.0511557	0.727418	0.57528
A.Azoarcus_unclassified	85	0.0454127	0.00735204	0.063007	0.0840653	0.310783	0.57528
D.Dechloromonas_aromatica	86	0.536801	0.148379	0.184575	0.593578	0.633863	0.57528
M.Methyloversatilis_unclassified	87	0.0111248	0.0661549	0.135419	0.0511557	0.633863	0.57528
T.Thauera_aminoaromatica	88	0.0469657	0.190203	0.36161	0.0840653	0.683544	0.707431
T.Thauera_unclassified	89	0.0425412	0.00579096	0.61095	0.0840653	0.310783	0.716932
D.Desulfovibrio_desulfuricans	90	0.000131946	0.112271	0.397827	0.00379345	0.633863	0.707431
A.Arcobacter_butzleri	91	0.00630526	0.69294	0.0700445	0.0381634	0.850626	0.57528
A.Arcobacter_unclassified	92	0.00399014	0.705085	0.017201	0.0269921	0.850626	0.57528
A.Aeromonas_aquariorum	93	0.0129001	0.139172	0.181251	0.0511557	0.633863	0.57528
A.Aeromonas_caviae	94	0.00215341	0.0926359	0.124663	0.0227871	0.633863	0.57528
A.Aeromonas_hydrophila	95	0.0108423	0.0461719	0.545831	0.0511557	0.633863	0.707431
A.Aeromonas_media	96	0.0482462	0.159651	0.271199	0.0840653	0.633863	0.663572
A.Aeromonas_unclassified	97	0.0151978	0.165355	0.0915811	0.0582581	0.633863	0.57528
A.Aeromonas_veronii	98	0.118558	0.0333927	0.561553	0.157853	0.633863	0.710148
T.Tolumonas_auensis	99	0.0204203	0.509213	0.10217	0.0670953	0.833506	0.57528
C.Citrobacter_freundii	100	0.000795215	0.723691	0.098547	0.0130643	0.850626	0.57528
C.Citrobacter_unclassified	101	0.0270321	0.54478	0.299588	0.0715872	0.833506	0.669976
E.Enterobacter_cloacae	102	0.00248125	0.523234	0.19062	0.0227871	0.833506	0.57528
E.Escherichia_unclassified	103	0.0550737	0.674334	0.993404	0.0917895	0.850626	0.993404
K.Klebsiella_pneumoniae	104	0.0886741	0.13042	0.520944	0.129083	0.633863	0.707431
K.Klebsiella_unclassified	105	0.00352818	0.567396	0.110565	0.0253588	0.833506	0.57528
A.Acinetobacter_johnsonii	106	0.0279317	0.575673	0.266748	0.0715872	0.833506	0.663572
A.Acinetobacter_parvus	107	0.000336062	0.867007	0.139209	0.00772943	0.906416	0.57528
A.Acinetobacter_tjernbergiae	108	0.0977069	0.135677	0.531862	0.132192	0.633863	0.707431
A.Acinetobacter_unclassified	109	0.0187918	0.164809	0.295193	0.0660775	0.633863	0.669976
E.Enhydrobacter_aerosaccus	110	0.0439368	0.578553	0.266181	0.0840653	0.833506	0.663572
C.Cellvibrio_unclassified	111	0.0100453	0.35528	0.381949	0.0511557	0.727418	0.707431
P.Pseudomonas_unclassified	112	0.0363917	0.139812	0.600386	0.0775008	0.633863	0.715967
A.Akkermansia_muciniphila	113	0.000773834	0.765632	0.638671	0.0130643	0.867635	0.724308
B.Bppunalikevirus_unclassified	114	0.00293417	0.835938	0.114049	0.0241021	0.881953	0.57528
Y.Yualikevirus_unclassified	115	0.0436591	0.396504	0.473245	0.0840653	0.727418	0.707431
FCE_DS	indexes	pValuesSource	pValuesLocation	pValuesTimepoint	pValuesSourceAdjusted	pValuesLocationAdjusted	pValuesTimepointAdjusted
M.Methanobrevibacter_smithii	1	4.69e-06	0.294629	0.274712	5.8e-05	0.658419	0.485651
A.actinobacterium_SCGC_AAA024_D14	2	0.0340283	0.0769064	0.308953	0.0502806	0.438587	0.509773
A.actinobacterium_SCGC_AAA027_L06	3	0.00556752	0.342772	0.653453	0.0115999	0.692539	0.71727
A.actinobacterium_SCGC_AAA028_A23	4	0.00514285	0.438187	0.699044	0.0110683	0.767759	0.739212
A.actinobacterium_SCGC_AAA044_N04	5	0.180075	0.10871	0.106826	0.217408	0.438587	0.364683
A.actinobacterium_SCGC_AAA278_O22	6	0.0270843	0.0959043	0.29186	0.0408529	0.438587	0.500166
B.Brevibacterium_unclassified	7	0.120267	0.0988385	0.088349	0.148831	0.438587	0.344832
G.Gordonia_amarae	8	0.0012249	0.109301	0.632058	0.00391179	0.438587	0.709784
T.Tetrasphaera_elongata	9	0.00443547	0.0012047	0.293026	0.0099798	0.039755	0.500166
A.Agromyces_unclassified	10	0.665246	0.587539	0.544567	0.693256	0.816493	0.649162
L.Leifsonia_unclassified	11	0.630663	0.835378	0.638089	0.671351	0.889273	0.709784
L.Leucobacter_unclassified	12	0.360102	0.522146	0.0179248	0.405115	0.816493	0.220979
R.Rhodococcus_erythropolis	13	0.0271047	0.633603	0.137234	0.0408529	0.816493	0.377394
N.Nocardioides_unclassified	14	0.648177	0.407951	0.336895	0.682654	0.762021	0.536589
B.Bifidobacterium_adolescentis	15	0.00104979	0.211532	0.227568	0.00358375	0.554761	0.44858
B.Bifidobacterium_longum	16	0.000320197	0.29207	0.305495	0.00144089	0.658419	0.509773
C.Collinsella_aerofaciens	17	0.00465032	0.312583	0.453876	0.0102307	0.658419	0.607213
B.Bacteroides_caccae	18	0.00637853	0.712784	0.0875329	0.012298	0.826645	0.344832
B.Bacteroides_dorei	19	0.00320436	0.718095	0.153566	0.0079308	0.826645	0.380247
B.Bacteroides_ovatus	20	0.00364524	0.686469	0.131074	0.00880193	0.826645	0.377394
B.Bacteroides_stercoris	21	0.00192642	0.544829	0.130062	0.00515446	0.816493	0.377394
B.Bacteroides_uniformis	22	0.00167949	0.707601	0.104052	0.00475057	0.826645	0.364683
B.Bacteroides_vulgatus	23	0.000200088	0.442043	0.0774937	0.00110048	0.767759	0.344832
P.Prevotella_copri	24	0.00751659	0.395786	0.186251	0.0134267	0.753516	0.409236
P.Prevotella_paludivivens	25	0.00385697	0.311925	0.0893342	0.00909143	0.658419	0.344832
A.Alistipes_putredinis	26	0.00156939	0.931352	0.0843008	0.0045697	0.950555	0.344832
C.Chryseobacterium_gleum	27	0.0352808	0.624113	0.534944	0.0513647	0.816493	0.649162
C.Chryseobacterium_unclassified	28	0.0191894	0.587625	0.419615	0.0311434	0.816493	0.585097
M.Myroides_unclassified	29	0.0155727	0.0354937	0.134412	0.0266084	0.39043	0.377394
R.Riemerella_unclassified	30	1.76e-05	0.0496874	0.0714579	0.000174613	0.409921	0.344832
F.Flavobacteria_bacterium_BAL38	31	0.00097604	0.0235911	0.437184	0.003451	0.354509	0.592893
P.Pedobacter_unclassified	32	0.0378774	0.645892	0.235618	0.0534834	0.816493	0.44858
C.Cyanobium_unclassified	33	0.125629	0.166672	0.191353	0.153547	0.483419	0.409236
E.Eubacterium_rectale	34	0.0407148	0.306808	0.179448	0.0559829	0.658419	0.409236
B.Ruminococcus_torques	35	0.00574136	0.786867	0.33421	0.0115999	0.863052	0.536589
P.Peptostreptococcaceae_noname_unclassified	36	0.107768	0.00914902	0.0149683	0.135052	0.226438	0.211695
F.Faecalibacterium_prausnitzii	37	0.31978	0.126997	0.346886	0.368119	0.438587	0.536589
S.Subdoligranulum_unclassified	38	0.0517667	0.129386	0.0733212	0.0674329	0.438587	0.344832
M.Megamonas_unclassified	39	2.86e-05	0.322027	0.153635	0.000238182	0.664182	0.380247
M.Mitsuokella_unclassified	40	0.244974	0.569274	0.74449	0.28872	0.816493	0.759841
N.Candidatus_Nitrospira_defluvii	41	0.00562978	0.371356	0.463397	0.0115999	0.731536	0.611684
A.alpha_proteobacterium_SCGC_AAA027_J10	42	0.045625	0.996958	0.00649708	0.0610388	0.996958	0.160803
B.Brevundimonas_unclassified	43	0.872728	0.987591	0.561767	0.881634	0.996958	0.654293
C.Caulobacter_unclassified	44	0.0186703	0.123902	0.500373	0.030806	0.438587	0.649162
C.Caulobacter_vibrioides	45	0.00143816	0.0411569	0.343668	0.00431448	0.407453	0.536589
A.Afipia_clevelandensis	46	0.339117	0.13465	0.595306	0.385892	0.438587	0.677417
A.Afipia_unclassified	47	3.31e-05	0.069027	0.194284	0.000241331	0.438587	0.409236
R.Rhodopseudomonas_palustris	48	0.280498	0.214101	0.519324	0.326698	0.554761	0.649162
R.Rhodopseudomonas_unclassified	49	0.576855	0.633096	0.697594	0.620746	0.816493	0.739212
P.Paracoccus_unclassified	50	0.705794	0.714118	0.144301	0.72785	0.826645	0.380247
R.Reyranella_massiliensis	51	0.000295386	0.142041	0.550804	0.00144089	0.438587	0.649162
H.Holospora_unclassified	52	0.00645958	0.0286472	0.431361	0.012298	0.354509	0.592893
S.Sphingobium_unclassified	53	0.0075949	0.146196	0.0135196	0.0134267	0.438587	0.211695
S.Sphingopyxis_unclassified	54	8.88e-09	0.918517	0.365803	4.39e-07	0.94722	0.540514
B.Bordetella_unclassified	55	0.478085	0.424478	0.0806108	0.525893	0.764061	0.344832
B.Burkholderia_unclassified	56	0.773678	0.227691	0.743523	0.78963	0.563534	0.759841
P.Polynucleobacter_necessarius	57	7.07e-10	0.526001	0.0546179	7e-08	0.816493	0.344832
R.Ralstonia_unclassified	58	0.941858	0.07386	0.352348	0.941858	0.438587	0.536653
T.Thiomonas_unclassified	59	0.18647	0.248605	0.894204	0.222415	0.60029	0.894204
A.Alicycliphilus_unclassified	60	0.000293454	0.0992291	0.701878	0.00144089	0.438587	0.739212
C.Comamonas_unclassified	61	0.00717336	0.889595	0.147083	0.0131933	0.927051	0.380247
L.Limnohabitans_unclassified	62	2.24e-08	0.629526	0.00145759	7.39e-07	0.816493	0.144301
P.Polaromonas_unclassified	63	0.0419621	0.422184	0.0140233	0.0569075	0.764061	0.211695
V.Variovorax_unclassified	64	0.559732	0.651545	0.233139	0.60894	0.816493	0.44858
V.Verminephrobacter_unclassified	65	0.00645628	0.376852	0.0770073	0.012298	0.731536	0.344832
H.Herbaspirillum_unclassified	66	0.0570042	0.672531	0.272093	0.0732911	0.826645	0.485651
J.Janthinobacterium_unclassified	67	0.037796	0.146004	0.020089	0.0534834	0.438587	0.220979
M.Massilia_unclassified	68	0.0383568	0.175789	0.00500084	0.0534834	0.483419	0.160803
M.Methylotenera_unclassified	69	0.0255733	0.591929	0.359909	0.0404449	0.816493	0.539864
M.Methylotenera_versatilis	70	0.0485402	0.461604	0.731113	0.064073	0.78791	0.759841
A.Aquaspirillum_serpens	71	4.73e-05	0.0541079	0.543416	0.000311973	0.412053	0.649162
A.Azoarcus_unclassified	72	0.00219058	0.000988409	0.0308954	0.00570703	0.039755	0.305864
D.Dechloromonas_aromatica	73	0.371637	0.561929	0.136844	0.413394	0.816493	0.377394
M.Methyloversatilis_unclassified	74	0.000305688	0.0167757	0.0894256	0.00144089	0.332159	0.344832
T.Thauera_unclassified	75	0.00400865	0.000834801	0.573245	0.00922921	0.039755	0.659899
D.Desulfovibrio_desulfuricans	76	9.33e-08	0.100338	0.383374	2.31e-06	0.438587	0.558148
A.Arcobacter_butzleri	77	0.000155987	0.642786	0.0456853	0.000908396	0.816493	0.344832
A.Arcobacter_unclassified	78	6.11e-05	0.775121	0.00371404	0.00037808	0.863052	0.160803
A.Aeromonas_aquariorum	79	0.000503201	0.138066	0.175072	0.00207571	0.438587	0.409236
A.Aeromonas_caviae	80	2.89e-05	0.098003	0.129384	0.000238182	0.438587	0.377394
A.Aeromonas_hydrophila	81	0.000423506	0.0277916	0.513392	0.00182292	0.354509	0.649162
A.Aeromonas_unclassified	82	0.000529886	0.1716	0.0502623	0.00209835	0.483419	0.344832
A.Aeromonas_veronii	83	0.0272353	0.0466192	0.406622	0.0408529	0.409921	0.57508
T.Tolumonas_auensis	84	0.00143453	0.516776	0.090562	0.00431448	0.816493	0.344832
C.Citrobacter_freundii	85	4.2e-06	0.728762	0.0857405	5.8e-05	0.829281	0.344832
C.Citrobacter_unclassified	86	0.000871518	0.533062	0.264623	0.00319557	0.816493	0.485651
E.Enterobacter_cloacae	87	1.2e-05	0.522881	0.17235	0.000132239	0.816493	0.409236
E.Escherichia_unclassified	88	0.0257377	0.646906	0.856243	0.0404449	0.816493	0.86498
K.Klebsiella_unclassified	89	3.41e-05	0.619888	0.0973087	0.000241331	0.816493	0.356799
A.Acinetobacter_johnsonii	90	0.00109375	0.598967	0.190494	0.00360937	0.816493	0.409236
A.Acinetobacter_parvus	91	6.87e-07	0.86719	0.11819	1.36e-05	0.913317	0.377394
A.Acinetobacter_tjernbergiae	92	0.0176644	0.109013	0.514886	0.0296402	0.438587	0.649162
A.Acinetobacter_unclassified	93	0.000841388	0.141943	0.269636	0.00319557	0.438587	0.485651
E.Enhydrobacter_aerosaccus	94	0.00237211	0.687959	0.219624	0.00602152	0.826645	0.44858
C.Cellvibrio_unclassified	95	0.0589215	0.29096	0.400449	0.074785	0.658419	0.574558
P.Pseudomonas_unclassified	96	0.00184837	0.218542	0.659309	0.00508303	0.554761	0.71727
A.Akkermansia_muciniphila	97	9.95e-07	0.790626	0.548236	1.64e-05	0.863052	0.649162
B.Bppunalikevirus_unclassified	98	0.00719635	0.802028	0.0628243	0.0131933	0.863052	0.344832
Y.Yualikevirus_unclassified	99	0.0155888	0.799319	0.233743	0.0266084	0.863052	0.44858
HOSP_RES	indexes	pValuesSource	pValuesLocation	pValuesTimepoint	pValuesSourceAdjusted	pValuesLocationAdjusted	pValuesTimepointAdjusted
M.Methanobrevibacter_smithii	1	0.273968	0.777025	0.085947	0.747598	0.896371	0.135443
M.Methanosaeta_concilii	2	0.718149	0.424608	0.0905534	0.908782	0.671637	0.140816
M.Methanosaeta_unclassified	3	0.964377	0.288854	0.67697	0.989608	0.557189	0.702854
M.Methanomethylovorans_hollandica	4	0.986017	0.00590375	0.402993	0.994875	0.0778982	0.469072
T.Tetrasphaera_elongata	5	0.565721	0.432411	6.39e-05	0.860773	0.672428	0.000524816
L.Leucobacter_unclassified	6	0.963719	0.400175	0.00399605	0.989608	0.671637	0.0116579
M.Microbacterium_laevaniformans	7	0.3868	0.0552823	0.000346589	0.793839	0.23458	0.00191165
K.Kocuria_rhizophila	8	9.02e-05	0.000986178	3.87e-07	0.0318272	0.0398479	7.65e-05
K.Kocuria_unclassified	9	0.295822	0.148765	0.236847	0.747598	0.348444	0.301831
M.Micrococcus_luteus	10	0.0788278	0.108036	0.00024541	0.67203	0.302909	0.0014683
N.Nakamurella_multipartita	11	0.00600634	0.0794142	0.219757	0.33973	0.264464	0.284155
R.Rhodococcus_erythropolis	12	0.987694	0.0139541	0.0966306	0.994875	0.11195	0.146398
M.Microlunatus_phosphovorus	13	0.0503714	0.260787	0.00466449	0.67203	0.514288	0.0131725
P.Propionibacterium_acnes	14	0.156	0.369505	0.16984	0.744926	0.64501	0.22539
B.Bifidobacterium_adolescentis	15	0.825542	0.00227286	1.55e-05	0.9301	0.0458148	0.000263847
B.Bifidobacterium_angulatum	16	0.249065	0.0121412	0.000183366	0.744926	0.105375	0.0012274
B.Bifidobacterium_animalis	17	0.258922	0.977653	0.00382219	0.744926	0.992629	0.0114342
B.Bifidobacterium_bifidum	18	0.611725	0.000147476	4.87e-05	0.880365	0.0288487	0.000440405
B.Bifidobacterium_breve	19	0.995648	0.00616097	0.0056741	0.995648	0.0778982	0.0151739
B.Bifidobacterium_catenulatum	20	0.50536	0.00190864	0.00251228	0.849352	0.0444006	0.00869445
B.Bifidobacterium_dentium	21	0.886147	0.930526	0.00324026	0.951364	0.98398	0.0102126
B.Bifidobacterium_longum	22	0.318056	0.00855494	5.45e-05	0.753516	0.0943716	0.000481011
B.Bifidobacterium_pseudocatenulatum	23	0.138834	0.0361931	8.9e-05	0.744926	0.18315	0.000713798
B.Bifidobacterium_thermophilum	24	0.182437	0.011695	0.289501	0.744926	0.105375	0.355618
G.Gardnerella_vaginalis	25	0.0392673	0.0182226	0.0171843	0.602668	0.128652	0.0370231
A.Adlercreutzia_equolifaciens	26	0.370884	0.0419561	0.00123438	0.793839	0.197473	0.00531387
C.Collinsella_aerofaciens	27	0.255315	0.577681	2.73e-05	0.744926	0.770404	0.000353743
C.Collinsella_intestinalis	28	0.325492	0.458619	0.00278285	0.754541	0.700834	0.00926741
C.Collinsella_stercoris	29	0.187914	0.625999	0.0226003	0.744926	0.799066	0.0455881
C.Collinsella_tanakaei	30	0.882993	0.11238	0.00639606	0.951364	0.302909	0.0164804
E.Eggerthella_lenta	31	0.66835	0.529549	0.000572408	0.885317	0.746775	0.00285532
E.Eggerthella_unclassified	32	0.100758	0.614908	9.06e-06	0.725868	0.795171	0.000228869
G.Gordonibacter_pamelaeae	33	0.673873	0.073249	0.000577949	0.885317	0.255194	0.00285532
O.Olsenella_unclassified	34	0.294695	0.109542	0.0974577	0.747598	0.302909	0.147019
S.Slackia_piriformis	35	0.729285	0.570734	0.000843131	0.9129	0.766951	0.00386526
B.Bacteroides_caccae	36	0.786048	0.199004	8.39e-06	0.918191	0.418146	0.000228869
B.Bacteroides_cellulosilyticus	37	0.778542	0.0925434	4.87e-05	0.918191	0.29698	0.000440405
B.Bacteroides_clarus	38	0.385954	0.709145	4.72e-05	0.793839	0.862092	0.000440405
B.Bacteroides_coprocola	39	0.894522	0.934413	0.000174235	0.953977	0.98398	0.00122313
B.Bacteroides_coprophilus	40	0.480182	0.800383	0.000184284	0.843238	0.917322	0.0012274
B.Bacteroides_dorei	41	0.462424	0.995355	9.08e-06	0.843238	0.997111	0.000228869
B.Bacteroides_eggerthii	42	0.512476	0.418115	3.57e-05	0.849352	0.671637	0.000359683
B.Bacteroides_faecis	43	0.587296	0.306763	2.79e-05	0.87464	0.58219	0.000353743
B.Bacteroides_finegoldii	44	0.684925	0.389759	3.7e-06	0.892172	0.661465	0.000163437
B.Bacteroides_fluxus	45	0.642048	0.358673	0.0219379	0.885317	0.644817	0.0445061
B.Bacteroides_fragilis	46	0.711722	0.352685	0.00232061	0.906996	0.638449	0.00819174
B.Bacteroides_gallinarum	47	0.558524	0.06748	0.00121453	0.857214	0.252281	0.00529296
B.Bacteroides_intestinalis	48	0.440935	0.723106	1.42e-06	0.843238	0.865276	0.000131346
B.Bacteroides_massiliensis	49	0.300734	0.426194	1.49e-06	0.747598	0.671637	0.000131346
B.Bacteroides_nordii	50	0.928069	0.285725	0.293843	0.975025	0.554181	0.358915
B.Bacteroides_oleiciplenus	51	0.375874	0.407807	0.0476773	0.793839	0.671637	0.0825005
B.Bacteroides_ovatus	52	0.937679	0.693447	2.25e-05	0.979292	0.855897	0.000317775
B.Bacteroides_plebeius	53	0.405996	0.104025	0.000567167	0.814299	0.302909	0.00285532
B.Bacteroides_salyersiae	54	0.535401	0.733836	0.000145959	0.849352	0.87515	0.00114497
B.Bacteroides_sp_1_1_30	55	0.152796	0.539455	2.64e-06	0.744926	0.746775	0.000155219
B.Bacteroides_sp_2_1_22	56	0.476566	0.0101427	0.167198	0.843238	0.0994549	0.223564
B.Bacteroides_sp_3_1_40A	57	0.355735	0.105277	8.62e-06	0.793839	0.302909	0.000228869
B.Bacteroides_sp_4_1_36	58	0.405438	0.106307	0.0957734	0.814299	0.302909	0.145724
B.Bacteroides_sp_4_3_47FAA	59	0.719041	0.769028	1.85e-05	0.908782	0.895507	0.000271469
B.Bacteroides_sp_9_1_42FAA	60	0.98649	0.106542	1.37e-05	0.994875	0.302909	0.000263709
B.Bacteroides_sp_D20	61	0.835246	0.948526	0.000232874	0.9301	0.98627	0.00146794
B.Bacteroides_stercoris	62	0.350388	0.493577	3.4e-05	0.787814	0.721432	0.000353743
B.Bacteroides_thetaiotaomicron	63	0.285168	0.47563	0.0273599	0.747598	0.7198	0.0533593
B.Bacteroides_uniformis	64	0.834017	0.973698	3.13e-05	0.9301	0.992629	0.000353743
B.Bacteroides_vulgatus	65	0.828388	0.590213	1.32e-05	0.9301	0.777407	0.000263709
B.Bacteroides_xylanisolvens	66	0.703178	0.0547867	1.42e-05	0.906996	0.23458	0.000263709
B.Bacteroidales_bacterium_ph8	67	0.282462	0.218643	0.000269915	0.747598	0.45135	0.001588
B.Barnesiella_intestinihominis	68	0.31053	0.422893	3.31e-05	0.749943	0.671637	0.000353743
C.Coprobacter_fastidiosus	69	0.409882	0.419286	0.00259073	0.817448	0.671637	0.00886788
D.Dysgonomonas_mossii	70	0.629307	0.435753	0.186277	0.881529	0.672816	0.244646
O.Odoribacter_laneus	71	0.925496	0.838946	0.000331285	0.975025	0.940476	0.00185625
O.Odoribacter_splanchnicus	72	0.674647	0.598993	3.38e-06	0.885317	0.786039	0.000163437
P.Parabacteroides_distasonis	73	0.128293	0.0428062	6.1e-06	0.741641	0.198824	0.000215327
P.Parabacteroides_goldsteinii	74	0.118885	0.814124	0.00022901	0.741641	0.928884	0.00146794
P.Parabacteroides_johnsonii	75	0.0900167	0.496634	0.000242949	0.706131	0.721432	0.0014683
P.Parabacteroides_merdae	76	0.474667	0.424097	1.57e-05	0.843238	0.671637	0.000263847
P.Parabacteroides_sp_20_3	77	0.955111	0.568726	4.34e-07	0.988722	0.766951	7.65e-05
P.Paraprevotella_clara	78	0.626863	0.586958	3.41e-05	0.881529	0.776016	0.000353743
P.Paraprevotella_unclassified	79	0.258741	0.508418	1.72e-05	0.744926	0.726606	0.000264006
P.Paraprevotella_xylaniphila	80	0.882815	0.259663	4.54e-05	0.951364	0.514288	0.000440405
P.Prevotella_copri	81	0.863443	0.0211524	5.7e-05	0.946569	0.138274	0.00048663
P.Prevotella_paludivivens	82	0.278865	0.114788	0.0502645	0.747598	0.302909	0.0861329
P.Prevotella_stercorea	83	0.790527	0.0101019	0.000176712	0.918191	0.0994549	0.00122313
A.Alistipes_finegoldii	84	0.314614	0.721439	1.17e-05	0.750397	0.865276	0.000263709
A.Alistipes_indistinctus	85	0.520549	0.483095	0.00129531	0.849352	0.721432	0.00550897
A.Alistipes_onderdonkii	86	0.247284	0.634892	3.38e-05	0.744926	0.800418	0.000353743
A.Alistipes_putredinis	87	0.250852	0.710222	0.000514099	0.744926	0.862092	0.00266878
A.Alistipes_senegalensis	88	0.461441	0.881306	0.000709002	0.843238	0.963161	0.00333704
A.Alistipes_shahii	89	0.576605	0.848572	0.000160062	0.873568	0.941968	0.00120217
A.Alistipes_sp_HGB5	90	0.623488	0.696344	0.000400232	0.880365	0.856479	0.00217357
C.Chryseobacterium_unclassified	91	0.946239	0.105643	0.0473321	0.985316	0.302909	0.0823066
E.Elizabethkingia_unclassified	92	0.123495	0.119276	0.487679	0.741641	0.302909	0.531329
E.Empedobacter_brevis	93	0.535407	0.00555438	0.0336699	0.849352	0.0778982	0.0622275
M.Myroides_unclassified	94	0.17826	0.132191	0.015857	0.744926	0.315293	0.0349846
R.Riemerella_unclassified	95	0.779373	0.0156804	0.00283177	0.918191	0.11777	0.00934219
F.Flavobacteria_bacterium_BAL38	96	0.239513	0.109971	0.0400303	0.744926	0.302909	0.0714337
S.Sphingobacterium_unclassified	97	0.921267	0.0612758	0.0648299	0.974342	0.2458	0.106442
E.Enterococcus_cecorum	98	0.452507	0.0314058	0.509858	0.843238	0.172957	0.545394
E.Enterococcus_faecalis	99	0.247793	0.319223	1.37e-05	0.744926	0.599393	0.000263709
E.Enterococcus_faecium	100	0.456334	0.0823183	0.0255891	0.843238	0.270821	0.050747
E.Enterococcus_saccharolyticus	101	0.549611	0.0920899	0.183565	0.84985	0.29698	0.242691
L.Lactobacillus_animalis	102	0.266259	0.351028	0.155229	0.747598	0.638449	0.209145
L.Lactobacillus_casei_paracasei	103	0.379952	0.890366	0.0623652	0.793839	0.970059	0.103356
L.Lactobacillus_crispatus	104	0.890745	0.836857	0.396815	0.952828	0.940476	0.466919
L.Lactobacillus_delbrueckii	105	0.662922	0.114377	0.630805	0.885317	0.302909	0.664699
L.Lactobacillus_fermentum	106	0.00624266	0.015332	0.0425368	0.33973	0.11777	0.074704
L.Lactobacillus_gasseri	107	0.226829	0.38789	0.363841	0.744926	0.661465	0.432444
L.Lactobacillus_mucosae	108	0.037326	0.26462	0.10897	0.602668	0.518949	0.159612
L.Lactobacillus_plantarum	109	0.340366	0.351564	0.509023	0.775156	0.638449	0.545394
L.Lactobacillus_reuteri	110	0.297031	0.739582	0.405036	0.747598	0.879032	0.469072
L.Lactobacillus_ruminis	111	0.0104492	0.00098836	0.0639703	0.46107	0.0398479	0.105521
L.Lactobacillus_salivarius	112	0.534971	0.370328	0.405289	0.849352	0.64501	0.469072
L.Leuconostoc_citreum	113	0.620123	0.194808	0.000513606	0.880365	0.414152	0.00266878
L.Leuconostoc_lactis	114	0.468415	0.477148	0.154061	0.843238	0.7198	0.208366
L.Leuconostoc_pseudomesenteroides	115	0.551319	0.409797	0.266621	0.84985	0.671637	0.331399
L.Leuconostoc_unclassified	116	0.034255	0.495041	0.606599	0.602668	0.721432	0.641106
W.Weissella_confusa	117	0.745753	0.294128	0.0095368	0.915276	0.564277	0.0224433
L.Lactococcus_garvieae	118	0.373501	0.107514	0.0279619	0.793839	0.302909	0.0542338
L.Lactococcus_lactis	119	0.745383	0.416743	0.0942378	0.915276	0.671637	0.145724
L.Lactococcus_raffinolactis	120	0.672311	0.383952	0.00305567	0.885317	0.657937	0.00980593
S.Streptococcus_anginosus	121	0.450372	0.907885	0.142186	0.843238	0.974114	0.196061
S.Streptococcus_australis	122	0.238825	0.0251726	0.00644868	0.744926	0.150609	0.0164955
S.Streptococcus_ferus	123	0.7916	0.0561413	0.0132001	0.918191	0.23458	0.0300621
S.Streptococcus_gallolyticus	124	0.0531006	0.569715	0.0135433	0.67203	0.766951	0.0304509
S.Streptococcus_infantarius	125	0.521815	0.381738	0.471082	0.849352	0.657334	0.514836
S.Streptococcus_lutetiensis	126	0.53402	0.431559	0.239489	0.849352	0.672428	0.304099
S.Streptococcus_macedonicus	127	0.783503	0.869449	0.0985741	0.918191	0.956922	0.148071
S.Streptococcus_parasanguinis	128	0.126951	0.149051	0.00945863	0.741641	0.348444	0.0224087
S.Streptococcus_salivarius	129	0.272304	0.157262	0.0100813	0.747598	0.360477	0.0235676
S.Streptococcus_sanguinis	130	0.886682	0.19593	0.0317936	0.951364	0.414152	0.0600169
S.Streptococcus_suis	131	0.0263584	0.0973355	0.000244879	0.602668	0.302909	0.0014683
S.Streptococcus_thermophilus	132	0.176072	0.273912	0.017534	0.744926	0.534204	0.0375122
S.Streptococcus_vestibularis	133	0.595197	0.537792	0.84801	0.875436	0.746775	0.855279
C.Clostridiaceae_bacterium_JC118	134	0.709293	0.119102	0.125859	0.906996	0.302909	0.179871
C.Clostridium_asparagiforme	135	0.480198	0.824849	0.00227685	0.843238	0.936243	0.00818984
C.Clostridium_bolteae	136	0.790932	0.617926	0.208786	0.918191	0.796087	0.271961
C.Clostridium_citroniae	137	0.976082	0.0748186	0.00530722	0.994875	0.256417	0.0146855
C.Clostridium_clostridioforme	138	0.667619	0.940988	0.000318412	0.885317	0.98398	0.0018129
C.Clostridium_hathewayi	139	0.247527	0.843099	0.00742981	0.744926	0.940476	0.0183652
C.Clostridium_leptum	140	0.951703	0.0134706	0.00177714	0.988091	0.110584	0.00674551
C.Clostridium_nexile	141	0.182395	0.00201249	0.0328832	0.744926	0.0444006	0.0613463
C.Clostridium_scindens	142	0.225189	0.350306	0.0200433	0.744926	0.638449	0.0416194
C.Clostridium_symbiosum	143	0.276564	0.528046	0.0172005	0.747598	0.746775	0.0370231
C.Bacteroides_pectinophilus	144	0.179071	0.0318476	0.991537	0.744926	0.172957	0.991537
C.Clostridiales_bacterium_1_7_47FAA	145	0.869124	0.0828574	0.00321933	0.946916	0.270821	0.0102126
F.Flavonifractor_plautii	146	0.199601	0.703423	0.428149	0.744926	0.862092	0.484412
E.Eubacterium_eligens	147	0.20172	0.665172	0.000582388	0.744926	0.82678	0.00285532
E.Eubacterium_hallii	148	0.813573	0.011912	0.000173302	0.9301	0.105375	0.00122313
E.Eubacterium_ramulus	149	0.513296	0.955927	0.00547642	0.849352	0.989567	0.0147571
E.Eubacterium_rectale	150	0.257599	0.00261331	0.00173073	0.744926	0.0485525	0.00664073
E.Eubacterium_siraeum	151	0.850356	0.115075	0.501304	0.935127	0.302909	0.541163
E.Eubacterium_sp_3_1_31	152	0.508484	0.154958	0.151741	0.849352	0.357518	0.206951
E.Eubacterium_ventriosum	153	0.538443	0.00183541	0.00922638	0.849352	0.0444006	0.0220062
A.Anaerostipes_hadrus	154	0.474163	0.324679	0.00159235	0.843238	0.603219	0.00624557
B.Blautia_hydrogenotrophica	155	0.293179	0.128054	0.00226569	0.747598	0.310914	0.00818984
B.Blautia_producta	156	0.976719	0.641568	0.0151919	0.994875	0.805956	0.0337279
B.Blautia_sp_KLE_1732	157	0.369723	0.0234005	0.00870233	0.793839	0.14242	0.0210406
B.Ruminococcus_gnavus	158	0.00355644	0.750087	0.00111116	0.313856	0.887782	0.004903
B.Ruminococcus_obeum	159	0.0279851	0.489773	0.000469841	0.602668	0.721432	0.00251294
B.Ruminococcus_torques	160	0.0762702	0.187911	0.00606262	0.67203	0.406948	0.0158652
B.Butyrivibrio_crossotus	161	0.665496	0.578349	0.103694	0.885317	0.770404	0.154447
C.Coprococcus_catus	162	0.0657093	0.0765814	0.00274355	0.67203	0.259935	0.00922357
C.Coprococcus_comes	163	0.247563	0.186139	0.00153863	0.744926	0.405598	0.00610266
C.Coprococcus_eutactus	164	0.542501	0.00974505	0.30147	0.849757	0.0994549	0.366962
D.Dorea_formicigenerans	165	0.710582	0.115391	0.00149064	0.906996	0.302909	0.00597951
D.Dorea_longicatena	166	0.579277	0.00082686	0.00028819	0.873867	0.0398479	0.00166772
L.Lachnospiraceae_bacterium_1_1_57FAA	167	0.751926	0.984193	0.438834	0.915276	0.992629	0.492502
L.Lachnospiraceae_bacterium_1_4_56FAA	168	0.622626	0.836217	0.00532505	0.880365	0.940476	0.0146855
L.Lachnospiraceae_bacterium_2_1_58FAA	169	0.309076	0.414771	0.590493	0.749943	0.671637	0.625958
L.Lachnospiraceae_bacterium_3_1_46FAA	170	0.834391	0.924733	0.122906	0.9301	0.983225	0.176365
L.Lachnospiraceae_bacterium_3_1_57FAA_CT1	171	0.437114	0.798099	0.159987	0.843238	0.917322	0.214735
L.Lachnospiraceae_bacterium_4_1_37FAA	172	0.4643	0.0611075	0.0495212	0.843238	0.2458	0.0852731
L.Lachnospiraceae_bacterium_5_1_57FAA	173	0.538543	0.189251	0.00193402	0.849352	0.407352	0.00718641
L.Lachnospiraceae_bacterium_5_1_63FAA	174	0.617515	0.124109	0.00423507	0.880365	0.308551	0.0122539
L.Lachnospiraceae_bacterium_6_1_63FAA	175	0.00210119	0.949949	0.0738858	0.247239	0.98627	0.118553
L.Lachnospiraceae_bacterium_7_1_58FAA	176	0.59879	0.0655879	0.00541608	0.877066	0.252281	0.0147067
L.Lachnospiraceae_bacterium_9_1_43BFAA	177	0.666258	0.176809	0.109903	0.885317	0.395024	0.159755
R.Roseburia_hominis	178	0.231372	0.815734	3.2e-05	0.744926	0.928884	0.000353743
R.Roseburia_intestinalis	179	0.111614	0.760011	5.12e-06	0.741641	0.892078	0.000200762
R.Roseburia_inulinivorans	180	0.615597	0.0199666	0.000172977	0.880365	0.137241	0.00122313
O.Oscillibacter_unclassified	181	0.989238	0.0121104	0.00373107	0.994875	0.105375	0.011354
P.Clostridium_bartlettii	182	0.107064	0.138822	0.0071979	0.741641	0.328888	0.0180203
P.Clostridium_sticklandii	183	0.805335	0.760667	0.0400676	0.92903	0.892078	0.0714337
A.Anaerotruncus_colihominis	184	0.466375	0.773738	0.0406264	0.843238	0.895507	0.072066
A.Anaerotruncus_unclassified	185	0.935055	0.983116	0.00365009	0.979292	0.992629	0.0112042
F.Faecalibacterium_prausnitzii	186	0.149386	0.974704	0.000154729	0.744926	0.992629	0.00118737
R.Ruminococcaceae_bacterium_D16	187	0.645556	0.0550971	0.0954846	0.885317	0.23458	0.145724
R.Ruminococcus_bromii	188	0.383733	0.0649224	0.013511	0.793839	0.252281	0.0304509
R.Ruminococcus_callidus	189	0.658738	0.020928	0.144562	0.885317	0.138274	0.198562
R.Ruminococcus_lactaris	190	0.115794	0.606413	0.0183762	0.741641	0.789904	0.0388431
R.Ruminococcus_sp_5_1_39BFAA	191	0.141732	0.173211	0.00163575	0.744926	0.389448	0.00634526
S.Subdoligranulum_unclassified	192	0.0351541	0.0368375	1.67e-05	0.602668	0.18315	0.000264006
C.Catenibacterium_mitsuokai	193	0.840885	0.00101595	0.0179022	0.930152	0.0398479	0.0380692
C.Coprobacillus_unclassified	194	0.238013	0.359855	0.109973	0.744926	0.644817	0.159755
E.Clostridium_innocuum	195	0.230415	0.532118	0.139184	0.744926	0.746775	0.193432
E.Clostridium_ramosum	196	0.843197	0.392784	0.570272	0.930152	0.66341	0.606344
E.Erysipelotrichaceae_bacterium_21_3	197	0.278651	0.977977	0.905553	0.747598	0.992629	0.910713
E.Erysipelotrichaceae_bacterium_2_2_44A	198	0.546247	0.491371	0.0148349	0.849757	0.721432	0.0331437
E.Erysipelotrichaceae_bacterium_5_2_54FAA	199	0.868508	0.897516	0.310808	0.946916	0.973635	0.377028
E.Erysipelotrichaceae_bacterium_6_1_45	200	0.376867	0.0271407	0.0827385	0.793839	0.158988	0.130972
E.Eubacterium_biforme	201	0.683659	0.0064134	0.0417427	0.892172	0.0780666	0.0736759
E.Eubacterium_cylindroides	202	0.83024	0.371305	0.0289429	0.9301	0.64501	0.0555263
H.Holdemania_filiformis	203	0.758412	0.443097	0.0287661	0.918191	0.680057	0.0554887
H.Holdemania_unclassified	204	0.0425854	0.751974	0.152829	0.62636	0.887782	0.207495
T.Turicibacter_unclassified	205	0.766692	0.21469	0.0714527	0.918191	0.447973	0.115701
A.Acidaminococcus_fermentans	206	0.819562	0.114181	0.78631	0.9301	0.302909	0.802218
A.Acidaminococcus_intestini	207	0.588782	0.602656	0.0777987	0.87464	0.787917	0.124267
A.Acidaminococcus_unclassified	208	0.428019	0.772494	0.73978	0.834755	0.895507	0.759135
P.Phascolarctobacterium_succinatutens	209	0.0838757	0.107336	0.00107192	0.684356	0.302909	0.0047897
A.Anaeromusa_acidaminophila	210	0.142655	0.0559519	0.410478	0.744926	0.23458	0.471248
D.Dialister_invisus	211	0.0385649	0.0673497	0.00103015	0.602668	0.252281	0.00466211
D.Dialister_succinatiphilus	212	0.196645	0.31201	0.233432	0.744926	0.588982	0.299642
M.Megamonas_funiformis	213	0.793338	0.0061356	0.131237	0.918191	0.0778982	0.184569
M.Megamonas_hypermegale	214	0.299295	0.654434	0.412158	0.747598	0.816308	0.471248
M.Megamonas_rupellensis	215	0.465097	0.00617889	0.0618123	0.843238	0.0778982	0.102923
M.Megamonas_unclassified	216	0.84024	0.0215511	0.225469	0.930152	0.138319	0.290477
M.Megasphaera_elsdenii	217	0.209338	0.870175	0.134449	0.744926	0.956922	0.188336
M.Megasphaera_unclassified	218	0.358393	0.720289	0.151843	0.793839	0.865276	0.206951
M.Mitsuokella_multacida	219	0.910657	0.000639701	0.470699	0.968259	0.0398479	0.514836
M.Mitsuokella_unclassified	220	0.502471	0.0225176	0.347759	0.849352	0.141941	0.417548
S.Selenomonas_bovis	221	0.0968207	0.0175011	0.712446	0.712035	0.126079	0.733217
V.Veillonella_atypica	222	0.781866	0.0030764	0.0057696	0.918191	0.0517129	0.0153133
V.Veillonella_dispar	223	0.241018	0.0080187	0.120191	0.744926	0.0913097	0.173173
V.Veillonella_parvula	224	0.0945004	0.00166418	0.00336312	0.709758	0.0444006	0.010506
V.Veillonella_unclassified	225	0.158994	0.102687	0.112331	0.744926	0.302909	0.162512
S.Sebaldella_termitidis	226	0.0722256	0.000442942	0.0737813	0.67203	0.0398479	0.118553
B.Brevundimonas_diminuta	227	0.0608329	0.00127417	0.00620857	0.67203	0.0444006	0.0161149
B.Brevundimonas_unclassified	228	0.0317173	0.368128	0.0215514	0.602668	0.64501	0.0439749
C.Caulobacter_unclassified	229	0.022627	0.0231904	0.450162	0.602668	0.14242	0.498142
C.Caulobacter_vibrioides	230	0.192347	0.00778041	0.6623	0.744926	0.0913097	0.691692
A.Afipia_unclassified	231	0.425077	0.482994	0.0013434	0.834129	0.721432	0.00557908
R.Rhodopseudomonas_palustris	232	0.546445	0.552142	0.0804814	0.849757	0.75545	0.127973
O.Ochrobactrum_anthropi	233	0.259563	0.420937	0.00184229	0.744926	0.671637	0.0069184
A.Agrobacterium_unclassified	234	0.995269	0.629733	0.694868	0.995648	0.799066	0.719321
S.Shinella_zoogloeoides	235	0.70445	0.539143	0.709442	0.906996	0.746775	0.732261
S.Sinorhizobium_unclassified	236	0.0790757	0.242553	0.915427	0.67203	0.489265	0.918028
P.Paracoccus_denitrificans	237	0.0764482	0.000163449	0.00389479	0.67203	0.0288487	0.0114572
P.Paracoccus_unclassified	238	0.0286757	0.00155568	0.0230376	0.602668	0.0444006	0.0462061
A.Acetobacter_unclassified	239	0.324622	0.997111	0.639824	0.754541	0.997111	0.670201
S.Sphingobium_unclassified	240	0.153459	0.012239	0.219344	0.744926	0.105375	0.284155
S.Sphingopyxis_unclassified	241	0.00673686	0.0316642	0.0530831	0.33973	0.172957	0.0900882
A.Achromobacter_unclassified	242	0.521615	0.942167	0.00364957	0.849352	0.98398	0.0112042
B.Burkholderia_unclassified	243	0.312299	0.0543587	0.44367	0.749943	0.23458	0.492502
B.Burkholderia_vietnamiensis	244	0.457364	0.171653	0.18643	0.843238	0.38842	0.244646
C.Cupriavidus_unclassified	245	0.484621	0.215738	0.0328124	0.843238	0.447973	0.0613463
B.Burkholderiales_bacterium_1_1_47	246	0.190184	0.372754	0.000644333	0.744926	0.64501	0.0031075
T.Thiomonas_unclassified	247	0.121631	0.00293214	0.44196	0.741641	0.0517129	0.492502
A.Acidovorax_delafieldii	248	0.183548	0.182032	0.443375	0.744926	0.401607	0.492502
A.Acidovorax_ebreus	249	0.828788	0.0703188	0.000651431	0.9301	0.252281	0.0031075
A.Alicycliphilus_denitrificans	250	0.584833	0.118083	0.0119479	0.87464	0.302909	0.027387
A.Alicycliphilus_unclassified	251	0.651722	0.914363	0.007495	0.885317	0.978091	0.0183732
C.Comamonas_testosteroni	252	0.792908	0.125313	0.130548	0.918191	0.30934	0.184334
C.Comamonas_unclassified	253	0.825593	0.686388	0.0611818	0.9301	0.850158	0.102356
D.Delftia_acidovorans	254	0.771205	0.060113	5.79e-05	0.918191	0.2458	0.00048663
D.Delftia_unclassified	255	0.921898	0.646723	0.00304573	0.974342	0.80955	0.00980593
L.Limnohabitans_unclassified	256	0.0785696	0.500039	0.338112	0.67203	0.721432	0.40735
P.Polaromonas_unclassified	257	0.0735361	0.571411	0.383462	0.67203	0.766951	0.452716
V.Variovorax_unclassified	258	0.0681731	0.0737388	0.800685	0.67203	0.255194	0.809862
V.Verminephrobacter_unclassified	259	0.0719311	0.931045	0.0211158	0.67203	0.98398	0.0434438
J.Janthinobacterium_unclassified	260	0.74106	0.113706	0.0377301	0.915276	0.302909	0.0679526
P.Parasutterella_excrementihominis	261	0.0799583	0.128593	0.0014745	0.67203	0.310914	0.00597951
S.Sutterella_wadsworthensis	262	0.0392561	0.370393	0.057618	0.602668	0.64501	0.0973166
A.Aquaspirillum_serpens	263	0.250517	0.112319	0.0955975	0.744926	0.302909	0.145724
K.Kingella_unclassified	264	0.959017	0.237211	0.41731	0.989608	0.481238	0.475195
L.Laribacter_hongkongensis	265	0.164133	0.169385	0.00541551	0.744926	0.38576	0.0147067
N.Neisseria_unclassified	266	0.395513	0.41087	0.00454413	0.806187	0.671637	0.0129583
A.Azoarcus_unclassified	267	0.748071	0.875045	0.290136	0.915276	0.959288	0.355618
A.Azospira_oryzae	268	0.121118	0.0338039	0.0873114	0.741641	0.178101	0.136982
D.Dechloromonas_aromatica	269	0.51933	0.371653	0.129535	0.849352	0.64501	0.183638
T.Thauera_aminoaromatica	270	0.659311	0.58541	0.0342188	0.885317	0.776016	0.0627956
T.Thauera_phenylacetica	271	0.126018	0.151184	0.0108975	0.741641	0.351105	0.0251427
T.Thauera_selenatis	272	0.267196	0.0155564	0.00220678	0.747598	0.11777	0.00811451
T.Thauera_terpenica	273	0.377204	0.070689	0.00377983	0.793839	0.252281	0.0114041
T.Thauera_unclassified	274	0.209524	0.0353849	0.328652	0.744926	0.18315	0.397308
B.Bilophila_unclassified	275	0.0348567	0.179324	0.00132581	0.602668	0.398122	0.00557156
B.Bilophila_wadsworthia	276	0.47699	0.119158	0.00493686	0.843238	0.302909	0.013831
D.Desulfovibrio_desulfuricans	277	0.136971	0.0468353	0.0169746	0.744926	0.214713	0.0369879
D.Desulfovibrio_magneticus	278	0.160963	0.037493	0.0197212	0.744926	0.183635	0.041438
D.Desulfovibrio_piger	279	0.747764	0.856821	0.141664	0.915276	0.948143	0.196061
P.Pelobacter_propionicus	280	0.644763	0.0323613	0.799641	0.885317	0.173084	0.809862
A.Arcobacter_butzleri	281	0.221076	0.192212	0.0262819	0.744926	0.411217	0.0518296
A.Arcobacter_unclassified	282	0.205304	0.12846	0.00242738	0.744926	0.310914	0.00848382
S.Sulfurospirillum_unclassified	283	0.444359	0.521755	0.269518	0.843238	0.742659	0.333824
A.Aeromonas_aquariorum	284	0.204547	0.436473	0.105893	0.744926	0.672816	0.155949
A.Aeromonas_caviae	285	0.291509	0.840358	0.0508712	0.747598	0.940476	0.0867514
A.Aeromonas_hydrophila	286	0.187188	0.628561	0.0211681	0.744926	0.799066	0.0434438
A.Aeromonas_media	287	0.0632999	0.0697224	0.102749	0.67203	0.252281	0.153687
A.Aeromonas_molluscorum	288	0.73818	0.844563	0.375123	0.915276	0.940476	0.444357
A.Aeromonas_salmonicida	289	0.333601	0.322784	0.412509	0.764684	0.602871	0.471248
A.Aeromonas_unclassified	290	0.2345	0.93898	0.241196	0.744926	0.98398	0.30448
A.Aeromonas_veronii	291	0.397384	0.899164	0.00892303	0.806187	0.973635	0.0214274
T.Tolumonas_auensis	292	0.769566	0.539279	0.460212	0.918191	0.746775	0.507672
S.Shewanella_unclassified	293	0.168084	0.12412	0.464508	0.744926	0.308551	0.510814
C.Citrobacter_freundii	294	0.484922	0.623383	0.106028	0.843238	0.799066	0.155949
C.Citrobacter_unclassified	295	0.611247	0.0564853	0.00142596	0.880365	0.23458	0.00585305
C.Cronobacter_sakazakii	296	0.107871	0.428512	0.423368	0.741641	0.672287	0.480543
E.Enterobacter_asburiae	297	0.327039	0.0379755	0.359092	0.754541	0.183635	0.428241
E.Enterobacter_cloacae	298	0.507638	0.0131917	0.0373852	0.849352	0.110584	0.0676767
E.Enterobacter_hormaechei	299	0.610016	0.631556	0.779887	0.880365	0.799066	0.797971
E.Enterobacter_mori	300	0.179674	0.11734	0.493874	0.744926	0.302909	0.536423
E.Escherichia_coli	301	0.344301	0.337465	0.00707968	0.779091	0.623691	0.0179793
E.Escherichia_unclassified	302	0.23586	0.00885837	0.00606741	0.744926	0.0947578	0.0158652
K.Klebsiella_oxytoca	303	0.56352	0.979204	0.0368431	0.860773	0.992629	0.0670393
K.Klebsiella_pneumoniae	304	0.363264	0.0644812	0.168344	0.793839	0.252281	0.224247
K.Klebsiella_unclassified	305	0.723194	0.766793	0.667702	0.908782	0.895507	0.695277
P.Pantoea_unclassified	306	0.310446	0.113126	0.135706	0.749943	0.302909	0.189345
R.Rahnella_unclassified	307	0.523149	0.250155	0.0657831	0.849352	0.498897	0.107507
R.Raoultella_ornithinolytica	308	0.0795391	0.0015226	0.241514	0.67203	0.0444006	0.30448
Y.Yersinia_intermedia	309	0.13026	0.040435	0.200127	0.741641	0.192886	0.261648
Y.Yersinia_unclassified	310	0.0513797	0.131345	0.247232	0.67203	0.315293	0.308385
H.Haemophilus_parainfluenzae	311	0.0929724	0.000664185	0.000188129	0.709758	0.0398479	0.00122981
A.Acinetobacter_baumannii	312	0.670965	0.720005	0.00261263	0.885317	0.865276	0.00886788
A.Acinetobacter_bereziniae	313	0.648863	0.710676	2.07e-06	0.885317	0.862092	0.000146441
A.Acinetobacter_bouvetii	314	0.764249	0.0365779	0.00229687	0.918191	0.18315	0.00818984
A.Acinetobacter_brisouii	315	0.530784	0.303994	0.410399	0.849352	0.580054	0.471248
A.Acinetobacter_gerneri	316	0.23008	0.221633	0.243301	0.744926	0.4548	0.305642
A.Acinetobacter_guillouiae	317	0.832152	0.0165023	0.129347	0.9301	0.121361	0.183638
A.Acinetobacter_indicus	318	0.200159	0.570141	0.0299972	0.744926	0.766951	0.0569302
A.Acinetobacter_johnsonii	319	0.235097	0.992215	0.0198414	0.744926	0.997111	0.0414438
A.Acinetobacter_junii	320	0.265477	0.545192	0.00743973	0.747598	0.748844	0.0183652
A.Acinetobacter_lwoffii	321	0.151061	0.0946893	0.529603	0.744926	0.301129	0.564803
A.Acinetobacter_parvus	322	0.5897	0.906776	0.034333	0.87464	0.974114	0.0627956
A.Acinetobacter_pittii_calcoaceticus_nosocomialis	323	0.47463	0.419914	0.000726626	0.843238	0.671637	0.00337499
A.Acinetobacter_schindleri	324	0.425157	0.467682	0.441437	0.834129	0.711602	0.492502
A.Acinetobacter_sp_CIP_102129	325	0.281836	0.0311935	0.00718647	0.747598	0.172957	0.0180203
A.Acinetobacter_sp_CIP_A162	326	0.368347	0.500918	0.796676	0.793839	0.721432	0.809862
A.Acinetobacter_sp_NIPH_284	327	0.659492	0.0274739	0.00798656	0.885317	0.158988	0.0194431
A.Acinetobacter_tandoii	328	0.324252	0.497252	0.0295366	0.754541	0.721432	0.056359
A.Acinetobacter_tjernbergiae	329	0.203862	0.222891	0.0103293	0.744926	0.4548	0.0239885
A.Acinetobacter_towneri	330	0.034971	0.921385	0.0253912	0.602668	0.982625	0.050639
A.Acinetobacter_unclassified	331	0.0734062	0.0713472	0.0330192	0.67203	0.252281	0.0613463
A.Acinetobacter_ursingii	332	0.122956	0.00362105	0.00290384	0.741641	0.0571528	0.00949124
E.Enhydrobacter_aerosaccus	333	0.532168	0.614962	0.0442421	0.849352	0.795171	0.0773141
P.Pseudomonas_aeruginosa	334	0.305986	0.246945	0.497639	0.749943	0.495294	0.538855
P.Pseudomonas_alcaligenes	335	0.188899	0.0202167	0.235389	0.744926	0.137241	0.30106
P.Pseudomonas_extremaustralis	336	0.881451	0.0786692	0.00387519	0.951364	0.264464	0.0114572
P.Pseudomonas_fragi	337	0.382517	0.00372384	0.090208	0.793839	0.0571528	0.140816
P.Pseudomonas_mandelii	338	0.213747	0.18579	0.356287	0.744926	0.405598	0.426336
P.Pseudomonas_mendocina	339	0.0853021	0.0680204	0.273852	0.684356	0.252281	0.338006
P.Pseudomonas_monteilii	340	0.61329	0.904039	0.246508	0.880365	0.974114	0.308385
P.Pseudomonas_protegens	341	0.529835	0.418083	0.637665	0.849352	0.671637	0.669927
P.Pseudomonas_putida	342	0.142633	0.977107	0.068618	0.744926	0.992629	0.111623
P.Pseudomonas_stutzeri	343	0.98534	0.0701876	0.398584	0.994875	0.252281	0.467442
P.Pseudomonas_unclassified	344	0.425335	0.00233617	0.0952258	0.834129	0.0458148	0.145724
P.Pseudoxanthomonas_unclassified	345	0.592931	0.979159	0.504118	0.875436	0.992629	0.542541
S.Stenotrophomonas_maltophilia	346	0.723421	0.0714676	0.0268278	0.908782	0.252281	0.0526123
S.Stenotrophomonas_unclassified	347	0.69334	0.544187	0.016836	0.899812	0.748844	0.0369136
A.Aminomonas_paucivorans	348	0.295085	0.123028	0.00455194	0.747598	0.308551	0.0129583
A.Akkermansia_muciniphila	349	0.00182087	0.109077	3.25e-05	0.247239	0.302909	0.000353743
B.Bcepmulikevirus_unclassified	350	0.0289515	0.0492323	0.404788	0.602668	0.222808	0.469072
B.Bppunalikevirus_unclassified	351	0.538965	0.108358	0.104254	0.849352	0.302909	0.154628
C.C2likevirus_unclassified	352	0.0361092	0.484565	0.0591062	0.602668	0.721432	0.0993547
Y.Yualikevirus_unclassified	353	0.749934	0.502755	0.435051	0.915276	0.721432	0.490649
INF_FCE	indexes	pValuesSource	pValuesLocation	pValuesTimepoint	pValuesSourceAdjusted	pValuesLocationAdjusted	pValuesTimepointAdjusted
M.Methanobrevibacter_smithii	1	0.293654	0.246039	0.174655	0.319282	0.565023	0.392797
M.Methanobrevibacter_unclassified	2	0.906571	0.892482	0.433302	0.912676	0.949652	0.583592
M.Methanosaeta_concilii	3	0.0450635	0.259041	0.00544076	0.0559087	0.582356	0.0813393
G.Gordonia_amarae	4	0.0244218	0.130656	0.653637	0.0346072	0.545496	0.71782
T.Tetrasphaera_elongata	5	0.0298809	0.0296641	0.757731	0.0398993	0.545496	0.792174
A.Agromyces_unclassified	6	0.0278092	0.891067	0.328679	0.0381419	0.949652	0.50597
L.Leifsonia_unclassified	7	0.0836963	0.842071	0.574704	0.0985243	0.932496	0.670919
L.Leucobacter_unclassified	8	0.00723397	0.669818	0.236287	0.0124308	0.863256	0.433642
M.Microbacterium_laevaniformans	9	0.523057	0.193978	0.323155	0.550683	0.545496	0.50597
K.Kocuria_rhizophila	10	0.0111234	0.284065	0.10115	0.0178812	0.615473	0.392797
N.Nakamurella_multipartita	11	0.964151	0.738808	0.667587	0.964151	0.888367	0.720609
R.Rhodococcus_erythropolis	12	0.451931	0.794711	0.80398	0.480881	0.913831	0.820481
N.Nocardioides_unclassified	13	0.598662	0.731749	0.0572405	0.613013	0.888367	0.392797
M.Microlunatus_phosphovorus	14	0.00949786	0.497764	0.151758	0.0156898	0.749239	0.392797
P.Propionibacterium_acnes	15	0.539849	0.347483	0.496431	0.562422	0.685273	0.625428
B.Bifidobacterium_adolescentis	16	0.00150554	0.689819	0.221552	0.00334462	0.866475	0.419266
B.Bifidobacterium_angulatum	17	0.000729601	0.794767	0.0742797	0.00198319	0.913831	0.392797
B.Bifidobacterium_animalis	18	0.00185244	0.263536	0.0918041	0.00390863	0.583684	0.392797
B.Bifidobacterium_bifidum	19	1.66e-05	0.149536	0.121324	0.000141669	0.545496	0.392797
B.Bifidobacterium_breve	20	0.00206204	0.620764	0.0772526	0.00425207	0.84703	0.392797
B.Bifidobacterium_catenulatum	21	0.000314764	0.560982	0.091827	0.00104643	0.780722	0.392797
B.Bifidobacterium_longum	22	0.000810318	0.460474	0.239301	0.00212531	0.723582	0.433642
B.Bifidobacterium_pseudocatenulatum	23	7.86e-05	0.959759	0.0696975	0.000345465	0.982767	0.392797
B.Bifidobacterium_thermophilum	24	0.0258443	0.509537	0.153681	0.0361095	0.750501	0.392797
G.Gardnerella_vaginalis	25	0.00224992	0.0343205	0.406949	0.00457637	0.545496	0.565388
A.Adlercreutzia_equolifaciens	26	0.000245282	0.605644	0.236504	0.000894381	0.834505	0.433642
C.Collinsella_aerofaciens	27	0.000997468	0.867869	0.159522	0.00246482	0.943611	0.392797
C.Collinsella_intestinalis	28	0.033666	0.945494	0.0727673	0.0436165	0.981607	0.392797
E.Eggerthella_lenta	29	0.00326763	0.900164	0.0774143	0.00638576	0.954429	0.392797
E.Eggerthella_unclassified	30	2.58e-05	0.54204	0.00322414	0.000178782	0.775454	0.0642678
G.Gordonibacter_pamelaeae	31	0.0348695	0.56049	0.157127	0.0447086	0.780722	0.392797
O.Olsenella_unclassified	32	0.0225027	0.850714	0.0993437	0.032821	0.93516	0.392797
B.Bacteroides_caccae	33	0.0238154	0.15353	0.000300826	0.0342347	0.545496	0.0128495
B.Bacteroides_cellulosilyticus	34	0.00151011	0.376158	0.0149316	0.00334462	0.685286	0.177674
B.Bacteroides_clarus	35	0.0042205	0.208481	0.133273	0.0079869	0.545496	0.392797
B.Bacteroides_coprocola	36	4.29e-05	0.230002	0.0736852	0.000246864	0.554635	0.392797
B.Bacteroides_coprophilus	37	0.000322617	0.398861	0.130171	0.00106003	0.701526	0.392797
B.Bacteroides_dorei	38	0.00135192	0.210087	0.000254936	0.00307431	0.545496	0.0127043
B.Bacteroides_eggerthii	39	4.85e-05	0.194166	0.00213698	0.000254358	0.545496	0.0491505
B.Bacteroides_faecis	40	0.00550372	0.221878	0.000228347	0.0100342	0.554635	0.0127043
B.Bacteroides_finegoldii	41	0.000143934	0.632856	0.0582538	0.000566267	0.848538	0.392797
B.Bacteroides_fragilis	42	2.01e-05	0.177091	0.00945842	0.000153945	0.545496	0.128548
B.Bacteroides_intestinalis	43	0.000525449	0.698733	0.0806216	0.00152533	0.866475	0.392797
B.Bacteroides_massiliensis	44	1.09e-05	0.102366	0.000210177	0.000101825	0.545496	0.0127043
B.Bacteroides_ovatus	45	0.418629	0.364302	0.00523657	0.44849	0.685286	0.0813393
B.Bacteroides_plebeius	46	0.000168569	0.162723	0.139892	0.000638001	0.545496	0.392797
B.Bacteroides_salyersiae	47	0.00159586	0.347685	0.129083	0.00349335	0.685273	0.392797
B.Bacteroides_sp_4_3_47FAA	48	0.000307472	0.350313	0.138114	0.0010447	0.685273	0.392797
B.Bacteroides_stercoris	49	4.45e-05	0.23277	0.00202032	0.000250878	0.556787	0.0491505
B.Bacteroides_thetaiotaomicron	50	0.53001	0.651726	0.0350284	0.556045	0.858441	0.361155
B.Bacteroides_uniformis	51	0.790661	0.541083	0.00080761	0.801382	0.775454	0.0241476
B.Bacteroides_vulgatus	52	0.000758468	0.208482	0.000502795	0.00202484	0.545496	0.018792
B.Bacteroides_xylanisolvens	53	0.00436782	0.0263681	0.00019384	0.00816237	0.545496	0.0127043
B.Bacteroidales_bacterium_ph8	54	0.000262693	0.885262	0.0867437	0.000935061	0.948722	0.392797
B.Barnesiella_intestinihominis	55	0.000269338	0.916352	0.0944804	0.000947437	0.964751	0.392797
D.Dysgonomonas_mossii	56	5.45e-05	0.532866	0.108059	0.000271542	0.773432	0.392797
O.Odoribacter_laneus	57	0.00185627	0.18142	0.144152	0.00390863	0.545496	0.392797
O.Odoribacter_unclassified	58	0.0909603	0.221672	0.396292	0.105825	0.554635	0.556297
P.Parabacteroides_distasonis	59	1.98e-05	0.456579	0.00503486	0.000153945	0.723582	0.0813393
P.Parabacteroides_goldsteinii	60	0.00123647	0.803043	0.143436	0.00291105	0.913831	0.392797
P.Parabacteroides_johnsonii	61	3.13e-06	0.845172	0.0730824	5.5e-05	0.932496	0.392797
P.Parabacteroides_merdae	62	1.16e-06	0.658633	0.00447087	2.47e-05	0.863256	0.0813393
P.Parabacteroides_sp_20_3	63	0.00773789	0.748072	0.141856	0.0132207	0.89113	0.392797
P.Parabacteroides_unclassified	64	0.592396	0.648679	0.749467	0.608682	0.858207	0.786283
P.Paraprevotella_clara	65	0.00607705	0.435701	0.101808	0.0108157	0.707525	0.392797
P.Paraprevotella_unclassified	66	1.94e-05	0.800838	0.0733752	0.000153945	0.913831	0.392797
P.Paraprevotella_xylaniphila	67	0.029229	0.462221	0.207606	0.0395452	0.723582	0.413827
P.Prevotella_copri	68	2.68e-05	0.0839237	0.00263901	0.000178782	0.545496	0.0563617
P.Prevotella_paludivivens	69	0.0349894	0.0391599	0.000721445	0.0447086	0.545496	0.023968
P.Prevotella_stercorea	70	0.00995815	0.193526	0.157442	0.0163598	0.545496	0.392797
A.Alistipes_finegoldii	71	0.000103266	0.953565	0.0851935	0.000434539	0.982767	0.392797
A.Alistipes_indistinctus	72	0.000903998	0.780208	0.175692	0.00227139	0.911258	0.392797
A.Alistipes_onderdonkii	73	2.44e-05	0.880817	0.00116249	0.000178282	0.948722	0.0315985
A.Alistipes_putredinis	74	3.37e-07	0.624885	3.16e-05	1.31e-05	0.84703	0.00943682
A.Alistipes_senegalensis	75	0.00386277	0.41734	0.0979599	0.00740363	0.707525	0.392797
A.Alistipes_shahii	76	4.21e-05	0.498657	0.0459149	0.00024685	0.749239	0.392797
C.Chryseobacterium_gleum	77	0.158079	0.668753	0.617487	0.179036	0.863256	0.699351
C.Chryseobacterium_unclassified	78	0.112415	0.694692	0.597522	0.129277	0.866475	0.685437
E.Empedobacter_brevis	79	0.0242468	0.135804	0.288673	0.0345228	0.545496	0.482197
M.Myroides_unclassified	80	0.000790271	0.0142823	0.793959	0.00209107	0.545496	0.818599
R.Riemerella_unclassified	81	0.176325	0.0552265	0.0133497	0.197457	0.545496	0.17262
F.Flavobacteria_bacterium_BAL38	82	0.0189588	0.0565617	0.628813	0.0282024	0.545496	0.704176
P.Pedobacter_unclassified	83	0.234872	0.123043	0.517511	0.258186	0.545496	0.636773
S.Sphingobacterium_unclassified	84	0.110302	0.14023	0.523356	0.127337	0.545496	0.637957
E.Enterococcus_cecorum	85	0.0299904	0.0788731	0.528076	0.0398993	0.545496	0.637957
E.Enterococcus_faecium	86	0.00291141	0.153211	0.332061	0.00588183	0.545496	0.506562
L.Lactobacillus_casei_paracasei	87	0.0302074	0.539968	0.169971	0.0399646	0.775454	0.392797
L.Lactobacillus_delbrueckii	88	0.000104345	0.145623	0.386575	0.000434539	0.545496	0.553043
L.Lactobacillus_fermentum	89	4.16e-05	0.97989	0.104102	0.00024685	0.990468	0.392797
L.Lactobacillus_gasseri	90	0.0307227	0.63047	0.0882404	0.0404673	0.848538	0.392797
L.Lactobacillus_mucosae	91	0.0229629	0.140826	0.238679	0.0333297	0.545496	0.433642
L.Lactobacillus_plantarum	92	0.040927	0.739811	0.715744	0.0514167	0.888367	0.75621
L.Lactobacillus_reuteri	93	0.00884029	0.247552	0.200614	0.0148497	0.565023	0.408104
L.Lactobacillus_ruminis	94	0.000515357	0.0354957	0.364442	0.0015107	0.545496	0.531552
L.Lactobacillus_salivarius	95	0.000280246	0.641044	0.17563	0.000963145	0.854975	0.392797
L.Leuconostoc_lactis	96	0.00101098	0.465177	0.303843	0.00247772	0.724416	0.493745
L.Leuconostoc_pseudomesenteroides	97	0.0407262	0.415133	0.170467	0.0514167	0.707525	0.392797
L.Leuconostoc_unclassified	98	0.00881328	0.147628	0.707928	0.0148497	0.545496	0.753276
L.Lactococcus_lactis	99	6.1e-06	0.159765	0.325384	8.12e-05	0.545496	0.50597
L.Lactococcus_raffinolactis	100	0.00669023	0.776056	0.0540757	0.0116981	0.909964	0.392797
S.Streptococcus_australis	101	0.013128	0.559769	0.123397	0.0204441	0.780722	0.392797
S.Streptococcus_ferus	102	0.0561551	0.502789	0.0717112	0.0674773	0.750216	0.392797
S.Streptococcus_infantarius	103	0.00144961	0.154128	0.659868	0.00325889	0.545496	0.71782
S.Streptococcus_lutetiensis	104	0.00640843	0.626066	0.267905	0.0113048	0.84703	0.463026
S.Streptococcus_macedonicus	105	0.0336971	0.146482	0.274369	0.0436165	0.545496	0.463483
S.Streptococcus_parasanguinis	106	2.38e-05	0.548855	0.0800357	0.000177698	0.780722	0.392797
S.Streptococcus_salivarius	107	0.000280204	0.443121	0.605251	0.000963145	0.70852	0.690726
S.Streptococcus_suis	108	0.00160063	0.705749	0.0621798	0.00349335	0.866475	0.392797
S.Streptococcus_thermophilus	109	6.32e-05	0.497968	0.14649	0.000300091	0.749239	0.392797
S.Streptococcus_vestibularis	110	0.0300246	0.99032	0.328284	0.0398993	0.990468	0.50597
C.Clostridium_asparagiforme	111	0.0288171	0.793215	0.147416	0.039165	0.913831	0.392797
C.Clostridium_bolteae	112	7.18e-06	0.843621	0.169987	8.35e-05	0.932496	0.392797
C.Clostridium_clostridioforme	113	0.00428769	0.66312	0.193935	0.00806302	0.863256	0.405501
C.Clostridium_hathewayi	114	0.000593302	0.697496	0.117752	0.00167356	0.866475	0.392797
C.Clostridium_leptum	115	7.54e-06	0.354949	0.113261	8.35e-05	0.685273	0.392797
C.Clostridium_nexile	116	2.8e-05	0.0891758	0.297622	0.000181744	0.545496	0.491542
C.Clostridium_scindens	117	0.0536925	0.428302	0.480642	0.0649962	0.707525	0.612692
C.Clostridium_symbiosum	118	0.000634065	0.560889	0.106485	0.00177183	0.780722	0.392797
C.Clostridiales_bacterium_1_7_47FAA	119	0.00882582	0.528759	0.165845	0.0148497	0.771215	0.392797
F.Flavonifractor_plautii	120	0.000829425	0.39312	0.212372	0.00213416	0.69552	0.415028
E.Eubacterium_eligens	121	3.02e-05	0.0593163	0.145516	0.000187941	0.545496	0.392797
E.Eubacterium_hallii	122	6.03e-06	0.051227	0.0549874	8.12e-05	0.545496	0.392797
E.Eubacterium_ramulus	123	1.55e-06	0.19418	0.134531	2.89e-05	0.545496	0.392797
E.Eubacterium_rectale	124	1.01e-05	0.07137	0.328259	9.79e-05	0.545496	0.50597
E.Eubacterium_siraeum	125	2.52e-05	0.958679	0.189228	0.000178782	0.982767	0.40127
E.Eubacterium_sp_3_1_31	126	0.000642545	0.113744	0.545073	0.00177419	0.545496	0.644548
E.Eubacterium_ventriosum	127	0.000120217	0.391919	0.527415	0.000492396	0.69552	0.637957
A.Anaerostipes_hadrus	128	4.65e-05	0.458381	0.592886	0.000252989	0.723582	0.685437
B.Blautia_hydrogenotrophica	129	0.000258196	0.880229	0.116017	0.000930128	0.948722	0.392797
B.Ruminococcus_gnavus	130	5.65e-05	0.12718	0.175169	0.000277123	0.545496	0.392797
B.Ruminococcus_obeum	131	6.04e-05	0.812162	0.493717	0.000291191	0.914806	0.625428
B.Ruminococcus_torques	132	0.00180525	0.829554	0.745048	0.0038555	0.928976	0.784399
C.Coprococcus_catus	133	3.66e-05	0.139107	0.251537	0.000223036	0.545496	0.447676
C.Coprococcus_comes	134	9.8e-07	0.372868	0.12048	2.3e-05	0.685286	0.392797
C.Coprococcus_eutactus	135	0.0120082	0.239179	0.635014	0.0190982	0.563107	0.708467
D.Dorea_formicigenerans	136	4.8e-07	0.255951	0.100693	1.59e-05	0.579768	0.392797
D.Dorea_longicatena	137	1.75e-07	0.0195515	0.211357	1.05e-05	0.545496	0.415028
L.Lachnospiraceae_bacterium_1_1_57FAA	138	0.00081816	0.0470817	0.674533	0.00212722	0.545496	0.725487
L.Lachnospiraceae_bacterium_1_4_56FAA	139	0.000406159	0.43725	0.104367	0.00125197	0.707525	0.392797
L.Lachnospiraceae_bacterium_2_1_58FAA	140	0.00114791	0.913809	0.301371	0.00279045	0.964751	0.492404
L.Lachnospiraceae_bacterium_3_1_46FAA	141	3.92e-08	0.211368	0.258975	5.86e-06	0.545496	0.451943
L.Lachnospiraceae_bacterium_3_1_57FAA_CT1	142	0.000514474	0.88375	0.232869	0.0015107	0.948722	0.432471
L.Lachnospiraceae_bacterium_4_1_37FAA	143	0.00642746	0.127765	0.160734	0.0113048	0.545496	0.392797
L.Lachnospiraceae_bacterium_5_1_57FAA	144	0.00675602	0.699181	0.0871412	0.0117445	0.866475	0.392797
L.Lachnospiraceae_bacterium_5_1_63FAA	145	1.4e-07	0.80499	0.221288	1.05e-05	0.913831	0.419266
L.Lachnospiraceae_bacterium_6_1_63FAA	146	0.00135187	0.185759	0.215769	0.00307431	0.545496	0.418927
L.Lachnospiraceae_bacterium_7_1_58FAA	147	2.95e-05	0.473637	0.139296	0.000187365	0.733769	0.392797
L.Lachnospiraceae_bacterium_9_1_43BFAA	148	0.00118616	0.133081	0.545387	0.00286019	0.545496	0.644548
R.Roseburia_hominis	149	7.35e-06	0.0964129	0.157009	8.35e-05	0.545496	0.392797
R.Roseburia_intestinalis	150	0.00133921	0.366018	0.128466	0.00307431	0.685286	0.392797
R.Roseburia_inulinivorans	151	3.32e-06	0.169688	0.182104	5.52e-05	0.545496	0.392797
O.Oscillibacter_unclassified	152	1.36e-06	0.17225	0.119415	2.72e-05	0.545496	0.392797
P.Clostridium_bartlettii	153	0.0239335	0.433742	0.249728	0.0342398	0.707525	0.447118
P.Clostridium_sticklandii	154	0.000154665	0.133187	0.0603284	0.000592881	0.545496	0.392797
P.Peptostreptococcaceae_noname_unclassified	155	0.00556608	0.225685	0.506176	0.0100864	0.554635	0.625428
A.Anaerotruncus_colihominis	156	0.00932336	0.972443	0.11827	0.0154871	0.98978	0.392797
F.Faecalibacterium_prausnitzii	157	7.96e-06	0.136107	0.154268	8.5e-05	0.545496	0.392797
R.Ruminococcaceae_bacterium_D16	158	0.000176439	0.12612	0.180531	0.000659443	0.545496	0.392797
R.Ruminococcus_bromii	159	1.93e-05	0.439212	0.45335	0.000153945	0.707525	0.597144
R.Ruminococcus_callidus	160	7.13e-05	0.0584773	0.390782	0.000323148	0.545496	0.554315
R.Ruminococcus_lactaris	161	3.08e-07	0.324203	0.433206	1.31e-05	0.669821	0.583592
R.Ruminococcus_sp_5_1_39BFAA	162	3.5e-07	0.507866	0.0986166	1.31e-05	0.750501	0.392797
S.Subdoligranulum_unclassified	163	0.000147889	0.70681	0.361709	0.000574272	0.866475	0.530152
C.Catenibacterium_mitsuokai	164	7.36e-09	0.108739	0.164291	2.2e-06	0.545496	0.392797
C.Coprobacillus_unclassified	165	2.69e-05	0.440133	0.196641	0.000178782	0.707525	0.408104
E.Erysipelotrichaceae_bacterium_21_3	166	0.038846	0.433359	0.080901	0.0494254	0.707525	0.392797
E.Erysipelotrichaceae_bacterium_6_1_45	167	0.000572539	0.526638	0.22478	0.00163037	0.771215	0.422441
E.Eubacterium_biforme	168	1.15e-07	0.169301	0.11874	1.05e-05	0.545496	0.392797
H.Holdemania_filiformis	169	0.0298833	0.680155	0.44198	0.0398993	0.866475	0.59261
A.Acidaminococcus_intestini	170	1.34e-05	0.162295	0.318304	0.000117931	0.545496	0.50597
A.Acidaminococcus_unclassified	171	6.86e-06	0.588756	0.0344223	8.35e-05	0.814992	0.361155
P.Phascolarctobacterium_succinatutens	172	8.02e-07	0.504326	0.108276	2.18e-05	0.750216	0.392797
A.Anaeromusa_acidaminophila	173	0.00196949	0.41773	0.2992	0.00410202	0.707525	0.491542
D.Dialister_invisus	174	3.79e-06	0.425209	0.182605	5.97e-05	0.707525	0.392797
D.Dialister_succinatiphilus	175	0.000984997	0.0421035	0.410269	0.00245429	0.545496	0.565388
M.Megamonas_funiformis	176	6.99e-05	0.0569763	0.456912	0.000323148	0.545496	0.599195
M.Megamonas_hypermegale	177	0.000898203	0.0969956	0.219764	0.00227139	0.545496	0.419266
M.Megamonas_rupellensis	178	6.86e-07	0.789296	0.178424	2.05e-05	0.913831	0.392797
M.Megamonas_unclassified	179	0.556616	0.226935	0.369781	0.577875	0.554635	0.534129
M.Megasphaera_elsdenii	180	0.00132622	0.230016	0.210931	0.00307431	0.554635	0.415028
M.Megasphaera_unclassified	181	0.000339938	0.67781	0.356167	0.0011048	0.866475	0.5246
M.Mitsuokella_multacida	182	0.0125701	0.0587737	0.241392	0.0197814	0.545496	0.434797
M.Mitsuokella_unclassified	183	0.536786	0.311101	0.531962	0.561185	0.65971	0.638782
S.Selenomonas_bovis	184	0.000559138	0.561389	0.162591	0.00160752	0.780722	0.392797
V.Veillonella_atypica	185	0.00313863	0.135765	0.150929	0.00621491	0.545496	0.392797
V.Veillonella_parvula	186	7.3e-05	0.234935	0.186611	0.000325609	0.557504	0.398548
V.Veillonella_unclassified	187	1.32e-05	0.149349	0.569662	0.000117931	0.545496	0.667957
S.Sebaldella_termitidis	188	1.01e-05	0.095159	0.17691	9.79e-05	0.545496	0.392797
N.Candidatus_Nitrospira_defluvii	189	0.0521999	0.433888	0.452783	0.0634462	0.707525	0.597144
B.Brevundimonas_diminuta	190	0.0157879	0.989704	0.383618	0.0239745	0.990468	0.55145
B.Brevundimonas_unclassified	191	0.419991	0.181692	0.288624	0.44849	0.545496	0.482197
C.Caulobacter_unclassified	192	0.062013	0.0922299	0.459574	0.0738721	0.545496	0.600055
C.Caulobacter_vibrioides	193	0.0157959	0.0465689	0.368038	0.0239745	0.545496	0.534129
A.Afipia_unclassified	194	0.00209564	0.134689	0.428373	0.00429175	0.545496	0.582198
R.Rhodopseudomonas_palustris	195	0.0561935	0.241859	0.660203	0.0674773	0.564967	0.71782
H.Hyphomicrobium_denitrificans	196	0.0170044	0.375788	0.200097	0.0255494	0.685286	0.408104
H.Hyphomicrobium_unclassified	197	0.0231431	0.377901	0.128683	0.033429	0.685286	0.392797
A.Agrobacterium_unclassified	198	0.0898846	0.0859696	0.598324	0.104982	0.545496	0.685437
S.Sinorhizobium_unclassified	199	0.268925	0.324829	0.451065	0.293462	0.669821	0.597144
P.Paracoccus_denitrificans	200	0.00036853	0.0429063	0.637491	0.00117224	0.545496	0.708587
P.Paracoccus_unclassified	201	0.00416737	0.114043	0.919393	0.00793658	0.545496	0.925584
R.Reyranella_massiliensis	202	0.0103094	0.196533	0.646324	0.0168443	0.545496	0.713103
H.Holospora_unclassified	203	0.0268211	0.174424	0.504173	0.0371273	0.545496	0.625428
B.Blastomonas_unclassified	204	0.313978	0.355242	0.391172	0.340143	0.685273	0.554315
S.Sphingobium_unclassified	205	0.0284701	0.138173	0.259981	0.0388701	0.545496	0.451943
S.Sphingobium_xenophagum	206	0.125148	0.153586	0.529141	0.142822	0.545496	0.637957
S.Sphingopyxis_unclassified	207	7.12e-05	0.806861	0.339007	0.000323148	0.913831	0.514534
B.Burkholderia_unclassified	208	0.165213	0.186345	0.50303	0.18571	0.545496	0.625428
P.Polynucleobacter_necessarius	209	0.0333975	0.358773	0.319576	0.0436064	0.685286	0.50597
R.Ralstonia_unclassified	210	0.163034	0.224415	0.767374	0.183952	0.554635	0.796683
B.Burkholderiales_bacterium_1_1_47	211	6.24e-06	0.928748	0.143722	8.12e-05	0.97437	0.392797
T.Thiomonas_unclassified	212	0.831178	0.0490058	0.541623	0.839602	0.545496	0.644548
A.Acidovorax_delafieldii	213	0.0871173	0.194214	0.078533	0.102149	0.545496	0.392797
A.Acidovorax_ebreus	214	4.94e-05	0.481027	0.639972	0.000254571	0.737575	0.708709
A.Alicycliphilus_denitrificans	215	0.501882	0.38046	0.800597	0.532137	0.685286	0.820481
A.Alicycliphilus_unclassified	216	0.0310842	0.209459	0.948944	0.0407639	0.545496	0.952128
C.Comamonas_testosteroni	217	0.000104638	0.0755379	0.501546	0.000434539	0.545496	0.625428
C.Comamonas_unclassified	218	0.514357	0.755143	0.997229	0.543437	0.895983	0.997229
D.Delftia_acidovorans	219	0.0449021	0.982645	0.0797311	0.0559087	0.990468	0.392797
D.Delftia_unclassified	220	0.000470113	0.318399	0.158514	0.00141984	0.665744	0.392797
L.Limnohabitans_unclassified	221	0.00323609	0.0415627	0.656971	0.00636573	0.545496	0.71782
P.Polaromonas_unclassified	222	0.00294423	0.70709	0.0910429	0.00590822	0.866475	0.392797
V.Variovorax_unclassified	223	0.0012346	0.287512	0.169333	0.00291105	0.618461	0.392797
V.Verminephrobacter_unclassified	224	0.0594708	0.612907	0.226055	0.071127	0.840638	0.422441
H.Herbaspirillum_unclassified	225	0.182883	0.669488	0.481547	0.203443	0.863256	0.612692
J.Janthinobacterium_unclassified	226	0.260918	0.389022	0.620681	0.285768	0.69552	0.700315
P.Parasutterella_excrementihominis	227	4.58e-05	0.813841	0.192124	0.000252989	0.914806	0.404544
S.Sutterella_wadsworthensis	228	1e-06	0.212395	0.143611	2.3e-05	0.545496	0.392797
A.Aquaspirillum_serpens	229	0.187878	0.02438	0.0605408	0.208057	0.545496	0.392797
L.Laribacter_hongkongensis	230	0.000374165	0.835776	0.324688	0.00117763	0.932451	0.50597
N.Neisseria_unclassified	231	0.000507898	0.74657	0.463489	0.0015107	0.89113	0.600799
A.Azoarcus_unclassified	232	0.00383315	0.109811	0.344286	0.00739426	0.545496	0.517294
A.Azospira_oryzae	233	0.0140299	0.282853	0.160179	0.0216234	0.615473	0.392797
D.Dechloromonas_aromatica	234	0.0216656	0.0599356	0.688144	0.0317549	0.545496	0.737474
M.Methyloversatilis_unclassified	235	0.00596021	0.204357	0.394294	0.0107356	0.545496	0.556104
T.Thauera_aminoaromatica	236	0.0471139	0.18462	0.349177	0.0579714	0.545496	0.518294
T.Thauera_selenatis	237	0.00467514	0.378709	0.20337	0.00862881	0.685286	0.408104
T.Thauera_terpenica	238	0.000746927	0.262991	0.154922	0.00201199	0.583684	0.392797
T.Thauera_unclassified	239	0.015122	0.0252253	0.804016	0.023187	0.545496	0.820481
B.Bilophila_unclassified	240	8.31e-06	0.944353	0.12036	8.57e-05	0.981607	0.392797
B.Bilophila_wadsworthia	241	0.00135722	0.478883	0.273797	0.00307431	0.737575	0.463483
D.Desulfovibrio_desulfuricans	242	0.0132257	0.157221	0.259643	0.0204895	0.545496	0.451943
D.Desulfovibrio_piger	243	0.0252852	0.494038	0.272904	0.0354943	0.749239	0.463483
P.Pelobacter_propionicus	244	0.0252509	0.438582	0.478248	0.0354943	0.707525	0.612692
A.Arcobacter_butzleri	245	0.626856	0.375995	0.00474572	0.639692	0.685286	0.0813393
A.Arcobacter_unclassified	246	0.0068396	0.695734	0.000237243	0.011821	0.866475	0.0127043
A.Aeromonas_aquariorum	247	0.010862	0.0347021	0.179293	0.0175554	0.545496	0.392797
A.Aeromonas_caviae	248	0.0412373	0.346005	0.464162	0.0515898	0.685273	0.600799
A.Aeromonas_hydrophila	249	0.573885	0.043002	0.118595	0.593742	0.545496	0.392797
A.Aeromonas_media	250	0.0199388	0.0158687	0.0404569	0.0295134	0.545496	0.392797
A.Aeromonas_molluscorum	251	0.0504139	0.128708	0.666052	0.0617777	0.545496	0.720609
A.Aeromonas_salmonicida	252	0.0277599	0.0977668	0.612474	0.0381419	0.545496	0.696311
A.Aeromonas_unclassified	253	0.00899063	0.116175	0.32825	0.0150179	0.545496	0.50597
A.Aeromonas_veronii	254	0.0118719	0.209908	0.624041	0.0189824	0.545496	0.701459
T.Tolumonas_auensis	255	0.0177295	0.866756	0.126808	0.0265057	0.943611	0.392797
C.Citrobacter_freundii	256	0.00176778	0.774057	0.347174	0.00380263	0.909964	0.518294
C.Citrobacter_unclassified	257	0.000221643	0.690534	0.200712	0.000818162	0.866475	0.408104
C.Cronobacter_sakazakii	258	0.129188	0.417882	0.447692	0.146871	0.707525	0.597144
E.Enterobacter_asburiae	259	0.00197556	0.042464	0.849845	0.00410202	0.545496	0.864298
E.Enterobacter_cloacae	260	0.000466268	0.184741	0.342629	0.00141984	0.545496	0.517294
E.Enterobacter_hormaechei	261	0.000128728	0.0726219	0.576676	0.000520129	0.545496	0.670919
E.Escherichia_coli	262	0.0203253	0.213455	0.506199	0.0299373	0.545496	0.625428
E.Escherichia_unclassified	263	0.0511123	0.739541	0.76443	0.0623779	0.888367	0.796392
K.Klebsiella_oxytoca	264	0.00445579	0.205731	0.902723	0.00827504	0.545496	0.914964
K.Klebsiella_pneumoniae	265	0.0469047	0.168386	0.328048	0.0579524	0.545496	0.50597
K.Klebsiella_unclassified	266	0.00121942	0.317602	0.0138558	0.00291105	0.665744	0.17262
R.Raoultella_ornithinolytica	267	0.0126733	0.0310181	0.270713	0.0198394	0.545496	0.463483
H.Haemophilus_parainfluenzae	268	0.000364678	0.0523106	0.259901	0.00117224	0.545496	0.451943
A.Acinetobacter_baumannii	269	0.0162583	0.297637	0.00727785	0.0245517	0.635668	0.103623
A.Acinetobacter_bereziniae	270	0.0266641	0.955902	0.15668	0.0370817	0.982767	0.392797
A.Acinetobacter_bouvetii	271	0.0345484	0.0127351	0.0552748	0.0445257	0.545496	0.392797
A.Acinetobacter_brisouii	272	0.000143428	0.973228	0.0717807	0.000566267	0.98978	0.392797
A.Acinetobacter_gerneri	273	4.77e-05	0.643376	0.298515	0.000254358	0.854975	0.491542
A.Acinetobacter_guillouiae	274	0.00603888	0.429895	0.32998	0.0108121	0.707525	0.50597
A.Acinetobacter_indicus	275	0.00031498	0.774046	0.202624	0.00104643	0.909964	0.408104
A.Acinetobacter_johnsonii	276	8.21e-05	0.0536295	0.0154499	0.000355676	0.545496	0.177674
A.Acinetobacter_junii	277	0.0105046	0.94031	0.0997987	0.01707	0.981607	0.392797
A.Acinetobacter_parvus	278	0.0016659	0.859856	0.0985818	0.00360944	0.941747	0.392797
A.Acinetobacter_pittii_calcoaceticus_nosocomialis	279	0.915875	0.27973	0.412223	0.918949	0.614995	0.565388
A.Acinetobacter_sp_NIPH_284	280	0.00064678	0.990468	0.0675378	0.00177419	0.990468	0.392797
A.Acinetobacter_tandoii	281	0.00377213	0.722984	0.152423	0.0073238	0.882336	0.392797
A.Acinetobacter_tjernbergiae	282	0.107004	0.137022	0.521882	0.124008	0.545496	0.637957
A.Acinetobacter_towneri	283	0.00038785	0.196195	0.0238035	0.00120799	0.545496	0.263602
A.Acinetobacter_unclassified	284	0.183031	0.179513	0.544027	0.203443	0.545496	0.644548
A.Acinetobacter_ursingii	285	0.0123488	0.245791	0.218838	0.019536	0.565023	0.419266
E.Enhydrobacter_aerosaccus	286	5.88e-06	0.12855	0.712392	8.12e-05	0.545496	0.755338
P.Pseudomonas_alcaligenes	287	0.697994	0.0572815	0.350152	0.709865	0.545496	0.518294
P.Pseudomonas_fragi	288	0.00308444	0.0804744	0.563515	0.00614832	0.545496	0.66335
P.Pseudomonas_mandelii	289	0.124679	0.123945	0.787436	0.142822	0.545496	0.814683
P.Pseudomonas_mendocina	290	0.073517	0.0784697	0.595743	0.0872285	0.545496	0.685437
P.Pseudomonas_protegens	291	0.00502028	0.349354	0.4172	0.00920898	0.685273	0.569602
P.Pseudomonas_putida	292	5.18e-05	0.43613	0.175791	0.000262499	0.707525	0.392797
P.Pseudomonas_unclassified	293	0.0407631	0.121545	0.911496	0.0514167	0.545496	0.920734
P.Pseudoxanthomonas_unclassified	294	0.199944	0.188595	0.469875	0.220602	0.545496	0.605572
S.Stenotrophomonas_maltophilia	295	0.38993	0.340065	0.411995	0.419385	0.685273	0.565388
S.Stenotrophomonas_unclassified	296	0.349707	0.344426	0.402556	0.377482	0.685273	0.56245
A.Akkermansia_muciniphila	297	0.000835107	0.374248	0.105302	0.00213416	0.685286	0.392797
B.Bppunalikevirus_unclassified	298	0.57768	0.164706	0.702218	0.595608	0.545496	0.749869
Y.Yualikevirus_unclassified	299	0.0781853	0.353793	0.101296	0.0924008	0.685273	0.392797
INF_PCE	indexes	pValuesSource	pValuesLocation	pValuesTimepoint	pValuesSourceAdjusted	pValuesLocationAdjusted	pValuesTimepointAdjusted
M.Methanobrevibacter_smithii	1	0.98935	0.60398	0.0373767	0.999176	0.698025	0.0664032
M.Methanobrevibacter_unclassified	2	0.203798	0.0282806	0.596325	0.698124	0.0874605	0.612839
M.Methanosaeta_concilii	3	0.864099	0.065134	0.000862254	0.96219	0.142188	0.0038918
M.Methanosaeta_unclassified	4	0.0763918	0.942804	0.387936	0.652196	0.957132	0.426219
T.Tetrasphaera_elongata	5	0.16951	0.147639	0.49058	0.680532	0.248815	0.516889
L.Leucobacter_unclassified	6	0.00858508	0.106803	0.023098	0.335433	0.196002	0.0453091
M.Microbacterium_laevaniformans	7	0.0516645	0.0450485	0.342025	0.598658	0.110345	0.383343
K.Kocuria_rhizophila	8	0.666065	0.0291024	0.000133092	0.887155	0.0891011	0.00105839
K.Kocuria_unclassified	9	0.487984	0.67343	0.336026	0.831564	0.749752	0.377887
M.Micrococcus_luteus	10	0.385134	0.75129	0.00215828	0.792512	0.809454	0.00735578
N.Nakamurella_multipartita	11	0.0242087	0.0868161	0.272646	0.47563	0.170568	0.317295
R.Rhodococcus_erythropolis	12	0.149989	0.440644	0.974898	0.680532	0.553763	0.974898
R.Rhodococcus_qingshengii	13	0.258468	0.285772	0.478108	0.719402	0.409648	0.506946
N.Nocardioides_unclassified	14	0.191413	0.585579	0.143687	0.694912	0.691107	0.187467
M.Microlunatus_phosphovorus	15	0.0341921	0.644197	0.0439477	0.598658	0.726898	0.0752745
P.Propionibacterium_acnes	16	0.730211	0.396001	0.132097	0.903298	0.518497	0.174231
B.Bifidobacterium_adolescentis	17	0.388779	0.0303525	6.23e-05	0.792512	0.0897145	0.000779439
B.Bifidobacterium_angulatum	18	0.185415	0.440293	1.76e-05	0.680532	0.553763	0.00045148
B.Bifidobacterium_animalis	19	0.00108573	0.00662787	1.09e-05	0.335433	0.0345892	0.000437337
B.Bifidobacterium_bifidum	20	0.0202881	0.000301355	0.000112895	0.451748	0.00698491	0.00104742
B.Bifidobacterium_breve	21	0.833245	0.0188617	0.000501866	0.96219	0.0658357	0.00261911
B.Bifidobacterium_catenulatum	22	0.55162	0.012031	0.00016981	0.846649	0.0502714	0.00118159
B.Bifidobacterium_dentium	23	0.611777	0.0667296	0.00127643	0.880747	0.144725	0.0051991
B.Bifidobacterium_longum	24	0.494631	0.0243183	0.000151526	0.834377	0.0773552	0.00112466
B.Bifidobacterium_pseudocatenulatum	25	0.237573	0.193749	4.66e-05	0.714891	0.314137	0.000638398
B.Bifidobacterium_thermophilum	26	0.80105	0.234098	0.00123802	0.953338	0.358664	0.00511738
G.Gardnerella_vaginalis	27	0.222917	0.0143206	0.0386403	0.714891	0.0538704	0.068285
A.Adlercreutzia_equolifaciens	28	0.473978	0.397411	0.0197643	0.831564	0.518497	0.0410018
C.Collinsella_aerofaciens	29	0.253836	0.722468	0.000138504	0.715394	0.791161	0.00107582
C.Collinsella_intestinalis	30	0.804623	0.80168	0.000284948	0.953338	0.842016	0.00173041
C.Collinsella_tanakaei	31	0.721644	0.279482	0.00429419	0.902502	0.404099	0.0126925
E.Eggerthella_lenta	32	0.389138	0.362815	2.63e-05	0.792512	0.492602	0.000500676
E.Eggerthella_unclassified	33	0.62152	0.809412	0.000249057	0.881267	0.845424	0.00154046
G.Gordonibacter_pamelaeae	34	0.213505	0.4319	0.00370652	0.713106	0.548958	0.0113729
O.Olsenella_unclassified	35	0.753653	0.375339	0.000228295	0.918686	0.499844	0.00146635
B.Bacteroides_caccae	36	0.700047	0.000827244	3.3e-05	0.894189	0.0131571	0.000500676
B.Bacteroides_cellulosilyticus	37	0.502337	0.0841477	0.000197577	0.83834	0.168295	0.00131982
B.Bacteroides_clarus	38	0.251056	0.00120632	8.71e-05	0.715394	0.0167879	0.000881171
B.Bacteroides_coprocola	39	0.457227	0.00114876	0.000363072	0.831564	0.0166819	0.00212747
B.Bacteroides_coprophilus	40	0.268441	0.00188032	0.000623464	0.723059	0.0183748	0.00301793
B.Bacteroides_dorei	41	0.267395	0.00331272	3.83e-05	0.723059	0.0257314	0.000556374
B.Bacteroides_eggerthii	42	0.71269	0.00192551	2.76e-05	0.897799	0.0183748	0.000500676
B.Bacteroides_faecis	43	0.700909	0.0110118	0.000976437	0.894189	0.0471529	0.00427545
B.Bacteroides_finegoldii	44	0.817712	0.0220429	1.57e-05	0.956993	0.074367	0.000437337
B.Bacteroides_fragilis	45	0.59894	0.031188	0.00631845	0.874607	0.0905809	0.0176292
B.Bacteroides_gallinarum	46	0.18323	0.372563	0.00150433	0.680532	0.499743	0.00572605
B.Bacteroides_intestinalis	47	0.693891	0.00600468	5.68e-06	0.894189	0.0343223	0.000316379
B.Bacteroides_massiliensis	48	0.429945	0.0015917	0.000150791	0.830067	0.0182359	0.00112466
B.Bacteroides_ovatus	49	0.682328	0.0167811	0.00123605	0.893379	0.0602839	0.00511738
B.Bacteroides_plebeius	50	0.487835	3.97e-05	6.86e-05	0.831564	0.00313536	0.000787512
B.Bacteroides_salyersiae	51	0.813547	0.0121851	0.00165241	0.956993	0.0502714	0.00606489
B.Bacteroides_sp_3_1_40A	52	0.883461	0.139592	0.0051532	0.967462	0.237877	0.0148377
B.Bacteroides_sp_4_3_47FAA	53	0.639507	0.00322002	0.000705473	0.881267	0.0256068	0.00336611
B.Bacteroides_sp_D20	54	0.172013	0.136527	2.31e-05	0.680532	0.237877	0.000500676
B.Bacteroides_stercoris	55	0.355167	0.0015969	3.03e-05	0.774901	0.0182359	0.000500676
B.Bacteroides_thetaiotaomicron	56	0.517138	0.429998	0.0502649	0.83834	0.548958	0.0822965
B.Bacteroides_uniformis	57	0.92708	0.0387606	0.000158597	0.98321	0.10181	0.00112727
B.Bacteroides_vulgatus	58	0.386726	0.00526412	0.000195596	0.792512	0.0338118	0.00131982
B.Bacteroides_xylanisolvens	59	0.922522	0.00717043	9.91e-05	0.98321	0.0352194	0.000973473
B.Bacteroidales_bacterium_ph8	60	0.288921	0.0580128	0.000126515	0.737754	0.129175	0.0010564
B.Barnesiella_intestinihominis	61	0.752543	0.0189228	2.86e-05	0.918686	0.0658357	0.000500676
C.Coprobacter_fastidiosus	62	0.472839	0.20633	0.0095165	0.831564	0.326607	0.0230327
D.Dysgonomonas_mossii	63	0.396694	0.636813	0.162223	0.799973	0.722381	0.206804
O.Odoribacter_laneus	64	0.940762	0.000493693	0.000211737	0.98321	0.00923765	0.00138667
O.Odoribacter_splanchnicus	65	0.678024	0.0128106	0.00154295	0.893379	0.0521796	0.00572605
O.Odoribacter_unclassified	66	0.108336	0.2056	0.406893	0.652196	0.326607	0.438395
P.Parabacteroides_distasonis	67	0.872187	0.304977	0.00648736	0.96219	0.43162	0.0176292
P.Parabacteroides_goldsteinii	68	0.121371	0.10408	0.117167	0.652196	0.192302	0.157164
P.Parabacteroides_johnsonii	69	0.242942	0.137479	8.7e-05	0.714891	0.237877	0.000881171
P.Parabacteroides_merdae	70	0.553596	0.0238424	0.000611887	0.846649	0.0765708	0.00300544
P.Parabacteroides_sp_20_3	71	0.802588	0.0226973	0.00215418	0.953338	0.0749072	0.00735578
P.Parabacteroides_unclassified	72	0.629384	0.966628	0.488439	0.881267	0.975389	0.516261
P.Paraprevotella_clara	73	0.184113	0.0140292	2.87e-05	0.680532	0.0538593	0.000500676
P.Paraprevotella_unclassified	74	0.210079	0.0708007	0.000373711	0.708751	0.148726	0.00215206
P.Paraprevotella_xylaniphila	75	0.707686	0.67041	0.000605834	0.897576	0.748886	0.00300544
P.Prevotella_copri	76	0.182799	0.000268716	1.29e-05	0.680532	0.00698491	0.000437337
P.Prevotella_paludivivens	77	0.0916812	0.0608949	0.00181329	0.652196	0.134695	0.00644297
P.Prevotella_stercorea	78	0.37042	0.0017486	0.000301286	0.788027	0.018251	0.00179696
A.Alistipes_finegoldii	79	0.901369	0.0376726	0.00011654	0.97326	0.101473	0.00105201
A.Alistipes_indistinctus	80	0.604544	0.124054	0.0175859	0.874607	0.219228	0.0378947
A.Alistipes_onderdonkii	81	0.790805	0.0491364	4.78e-05	0.950104	0.116394	0.000638398
A.Alistipes_putredinis	82	0.536457	0.0143547	0.0017003	0.83834	0.0538704	0.00617281
A.Alistipes_senegalensis	83	0.999176	0.00442661	6.89e-05	0.999176	0.0301732	0.000787512
A.Alistipes_shahii	84	0.873303	0.00228327	1.4e-05	0.96219	0.0206112	0.000437337
A.Alistipes_sp_HGB5	85	0.46042	0.100002	7.07e-05	0.831564	0.188978	0.000787512
C.Chryseobacterium_unclassified	86	0.535136	0.370235	0.0589581	0.83834	0.498623	0.0920188
E.Elizabethkingia_unclassified	87	0.246145	0.142264	0.672475	0.714891	0.241199	0.684776
E.Empedobacter_brevis	88	0.327602	0.00350995	0.0413311	0.770556	0.0263024	0.0715263
M.Myroides_unclassified	89	0.838188	0.431619	0.000472783	0.96219	0.548958	0.0025375
R.Riemerella_unclassified	90	0.476699	0.791819	0.0231972	0.831564	0.836159	0.0453091
F.Flavobacteria_bacterium_BAL38	91	0.0988073	0.320599	1.31e-06	0.652196	0.444316	0.000145519
P.Pedobacter_unclassified	92	0.829016	0.16454	0.0819493	0.961726	0.272061	0.118683
S.Sphingobacterium_unclassified	93	0.66042	0.0228759	0.00846467	0.886126	0.0749072	0.0210985
E.Enterococcus_cecorum	94	0.457024	0.0011147	0.169122	0.831564	0.0166819	0.212356
E.Enterococcus_faecalis	95	0.454162	0.431116	0.00767404	0.831564	0.548958	0.0198692
E.Enterococcus_faecium	96	0.282907	0.0293447	0.0132933	0.737754	0.0891011	0.0292104
L.Lactobacillus_animalis	97	0.120007	0.489431	0.00355352	0.652196	0.598791	0.0110923
L.Lactobacillus_casei_paracasei	98	0.715013	0.3438	0.0282112	0.897799	0.46869	0.0535372
L.Lactobacillus_delbrueckii	99	0.524751	0.00776974	0.0372941	0.83834	0.0365506	0.0664032
L.Lactobacillus_fermentum	100	0.151905	0.500767	0.0103438	0.680532	0.606001	0.0243299
L.Lactobacillus_gasseri	101	0.223875	0.7936	0.0187749	0.714891	0.836159	0.0396888
L.Lactobacillus_mucosae	102	0.846912	0.00633695	0.0163047	0.96219	0.0343223	0.0353621
L.Lactobacillus_plantarum	103	0.870028	0.863024	0.385975	0.96219	0.892415	0.425465
L.Lactobacillus_reuteri	104	0.903325	0.046136	0.0023998	0.97326	0.110673	0.00793598
L.Lactobacillus_ruminis	105	0.932563	6.18e-06	0.00936296	0.98321	0.00206257	0.0229943
L.Lactobacillus_salivarius	106	0.935042	0.453423	0.160643	0.98321	0.565087	0.205573
L.Leuconostoc_citreum	107	0.104489	0.264511	0.000955126	0.652196	0.387883	0.0042535
L.Leuconostoc_lactis	108	0.158797	0.0406052	0.425194	0.680532	0.103684	0.456639
L.Leuconostoc_pseudomesenteroides	109	0.529093	0.1038	0.000806704	0.83834	0.192302	0.00374221
L.Leuconostoc_unclassified	110	0.472949	0.223305	0.305687	0.831564	0.346775	0.349655
W.Weissella_confusa	111	0.95439	0.791794	0.0185996	0.986893	0.836159	0.0395687
L.Lactococcus_lactis	112	0.150273	0.00681643	0.0205493	0.680532	0.035026	0.0421071
L.Lactococcus_raffinolactis	113	0.0544714	0.561603	0.00147235	0.598658	0.669912	0.00571821
S.Streptococcus_australis	114	0.123227	0.319624	0.0290052	0.652196	0.444316	0.0544256
S.Streptococcus_ferus	115	0.743279	0.0410214	6.3e-05	0.916071	0.103684	0.000779439
S.Streptococcus_infantarius	116	0.666694	0.00711052	0.257066	0.887155	0.0352194	0.301263
S.Streptococcus_lutetiensis	117	0.952859	0.474486	0.164851	0.986893	0.584791	0.207869
S.Streptococcus_macedonicus	118	0.818494	0.0309947	0.0398694	0.956993	0.0905809	0.0697192
S.Streptococcus_parasanguinis	119	0.332794	0.0332385	0.000412124	0.771898	0.0940818	0.00233304
S.Streptococcus_salivarius	120	0.875765	0.0296956	0.00144451	0.96219	0.0893542	0.00571821
S.Streptococcus_suis	121	0.00227166	0.0154204	2.69e-08	0.335433	0.0572268	9e-06
S.Streptococcus_thermophilus	122	0.245194	0.0388301	0.000244986	0.714891	0.10181	0.00154046
S.Streptococcus_vestibularis	123	0.399987	0.716455	0.205294	0.799973	0.787158	0.249339
C.Clostridium_asparagiforme	124	0.559491	0.698796	0.00371152	0.849409	0.77029	0.0113729
C.Clostridium_bolteae	125	0.508608	0.19558	0.00218386	0.83834	0.315573	0.00736776
C.Clostridium_clostridioforme	126	0.997818	0.242186	0.00720391	0.999176	0.367425	0.0189905
C.Clostridium_hathewayi	127	0.124972	0.0393218	0.00398588	0.652196	0.10181	0.0121026
C.Clostridium_leptum	128	0.941998	0.00755272	0.0338729	0.98321	0.036312	0.0611544
C.Clostridium_nexile	129	0.983596	0.00163795	0.110855	0.999176	0.0182359	0.151124
C.Clostridium_scindens	130	0.512676	0.0965747	0.04632	0.83834	0.18432	0.0781357
C.Clostridium_symbiosum	131	0.899357	0.090214	0.0218583	0.97326	0.175183	0.0438692
C.Clostridiales_bacterium_1_7_47FAA	132	0.102292	0.500125	0.0195548	0.652196	0.606001	0.0408206
F.Flavonifractor_plautii	133	0.3191	0.0337676	0.0567135	0.755882	0.0947763	0.0904238
E.Eubacterium_eligens	134	0.462587	0.000190716	0.000985657	0.831564	0.00636993	0.00427545
E.Eubacterium_hallii	135	0.0160085	3.74e-05	0.000103029	0.383024	0.00313536	0.000983188
E.Eubacterium_ramulus	136	0.204839	0.00574837	0.0742849	0.698124	0.0343223	0.110864
E.Eubacterium_rectale	137	0.0912449	0.00056254	0.0535864	0.652196	0.00988887	0.0864631
E.Eubacterium_siraeum	138	0.637378	0.13691	0.25024	0.881267	0.237877	0.295336
E.Eubacterium_sp_3_1_31	139	0.64622	0.0063828	0.32646	0.881267	0.0343223	0.371466
E.Eubacterium_ventriosum	140	0.200997	0.0121916	0.0749853	0.698124	0.0502714	0.111311
A.Anaerostipes_hadrus	141	0.429253	0.0499506	0.0213426	0.830067	0.116404	0.0432026
B.Blautia_hydrogenotrophica	142	0.895816	0.409313	0.0329494	0.97326	0.531947	0.0603366
B.Blautia_producta	143	0.345427	0.19987	0.00146498	0.774901	0.320945	0.00571821
B.Ruminococcus_gnavus	144	0.18076	0.00134581	0.002375	0.680532	0.01798	0.00793249
B.Ruminococcus_obeum	145	0.254886	0.0235476	0.00758782	0.715394	0.0763581	0.0197995
B.Ruminococcus_torques	146	0.122435	0.125414	0.154717	0.652196	0.220465	0.199094
B.Butyrivibrio_crossotus	147	0.353474	0.0860174	0.106196	0.774901	0.170568	0.145965
C.Coprococcus_catus	148	0.119632	0.00386536	0.0973275	0.652196	0.0280331	0.136014
C.Coprococcus_comes	149	0.331305	0.00614072	0.00185249	0.771898	0.0343223	0.00651298
C.Coprococcus_eutactus	150	0.376751	0.0134198	0.164713	0.792512	0.0533598	0.207869
D.Dorea_formicigenerans	151	0.471785	0.0076103	0.0100168	0.831564	0.036312	0.0237689
D.Dorea_longicatena	152	0.00873927	1.88e-05	0.000747642	0.335433	0.00313409	0.00351707
L.Lachnospiraceae_bacterium_1_1_57FAA	153	0.172501	0.263829	0.596041	0.680532	0.387883	0.612839
L.Lachnospiraceae_bacterium_1_4_56FAA	154	0.303227	0.0389869	0.00990858	0.739863	0.10181	0.0237689
L.Lachnospiraceae_bacterium_2_1_58FAA	155	0.293776	0.625872	0.0578191	0.737754	0.715895	0.0910923
L.Lachnospiraceae_bacterium_3_1_46FAA	156	0.0751743	0.00633967	0.0603935	0.652196	0.0343223	0.0938206
L.Lachnospiraceae_bacterium_3_1_57FAA_CT1	157	0.449273	0.184802	0.0659336	0.831564	0.301093	0.101483
L.Lachnospiraceae_bacterium_4_1_37FAA	158	0.768287	0.00159615	0.0796626	0.933119	0.0182359	0.117213
L.Lachnospiraceae_bacterium_5_1_57FAA	159	0.289473	0.138904	0.0237339	0.737754	0.237877	0.0460879
L.Lachnospiraceae_bacterium_5_1_63FAA	160	0.682868	0.0346602	0.0224164	0.893379	0.0964708	0.0445659
L.Lachnospiraceae_bacterium_6_1_63FAA	161	0.168562	0.0326272	0.112479	0.680532	0.0937754	0.152097
L.Lachnospiraceae_bacterium_7_1_58FAA	162	0.0824238	0.0354334	0.0042328	0.652196	0.0978078	0.0126228
L.Lachnospiraceae_bacterium_9_1_43BFAA	163	0.15891	0.00797747	0.080083	0.680532	0.0370066	0.117315
R.Roseburia_hominis	164	0.00950975	6.56e-05	8.33e-05	0.335433	0.00313536	0.000881171
R.Roseburia_intestinalis	165	0.230213	0.00645628	0.000611034	0.714891	0.0343223	0.00300544
R.Roseburia_inulinivorans	166	0.118761	0.000313694	0.00154006	0.652196	0.00698491	0.00572605
O.Oscillibacter_unclassified	167	0.0658583	0.00215555	0.00792554	0.646961	0.0199987	0.0202071
P.Clostridium_bartlettii	168	0.10469	0.325569	0.0301925	0.652196	0.449339	0.0563368
P.Clostridium_sticklandii	169	0.156983	0.00716097	0.000470454	0.680532	0.0352194	0.0025375
A.Anaerotruncus_colihominis	170	0.0646876	0.390655	0.0682876	0.646961	0.515727	0.103947
F.Faecalibacterium_prausnitzii	171	0.241396	0.0092157	0.00598326	0.714891	0.0420449	0.0170804
R.Ruminococcaceae_bacterium_D16	172	0.0432569	0.00931534	0.0388986	0.598658	0.0420449	0.0683797
R.Ruminococcus_bromii	173	0.1804	0.0136979	0.0865296	0.680532	0.0538249	0.123143
R.Ruminococcus_callidus	174	0.233642	0.000360708	0.0505116	0.714891	0.00752978	0.0822969
R.Ruminococcus_lactaris	175	0.291825	0.0209513	0.523025	0.737754	0.0714056	0.547618
R.Ruminococcus_sp_5_1_39BFAA	176	0.463848	0.00995767	0.00841183	0.831564	0.0443448	0.0210985
S.Subdoligranulum_unclassified	177	0.114956	0.0675164	0.00472728	0.652196	0.145487	0.0138501
C.Catenibacterium_mitsuokai	178	0.0158353	0.000497837	0.00124104	0.383024	0.00923765	0.00511738
C.Coprobacillus_unclassified	179	0.52393	0.0266457	0.0407291	0.83834	0.0839591	0.0708516
E.Clostridium_innocuum	180	0.623398	0.0514412	0.0820833	0.881267	0.118492	0.118683
E.Clostridium_ramosum	181	0.448341	0.366801	0.502113	0.831564	0.495998	0.527376
E.Erysipelotrichaceae_bacterium_21_3	182	0.658116	0.0443088	0.227244	0.886126	0.109623	0.272041
E.Erysipelotrichaceae_bacterium_2_2_44A	183	0.335335	0.148246	0.0808596	0.772427	0.248815	0.117935
E.Erysipelotrichaceae_bacterium_6_1_45	184	0.968641	0.0571097	0.198129	0.99556	0.128806	0.241515
E.Eubacterium_biforme	185	0.487159	0.00189795	0.00649221	0.831564	0.0183748	0.0176292
E.Eubacterium_cylindroides	186	0.567242	0.638031	0.334014	0.850583	0.722381	0.376895
H.Holdemania_filiformis	187	0.140159	0.977218	0.391274	0.680532	0.983104	0.428477
H.Holdemania_unclassified	188	0.871404	0.0697235	0.131457	0.96219	0.14739	0.174231
A.Acidaminococcus_intestini	189	0.175338	0.00280327	0.044467	0.680532	0.022842	0.0754842
A.Acidaminococcus_unclassified	190	0.226391	0.546917	0.00834307	0.714891	0.654732	0.0210985
P.Phascolarctobacterium_succinatutens	191	0.121287	0.959535	0.00208121	0.652196	0.971166	0.00724087
A.Anaeromusa_acidaminophila	192	0.399936	0.0499038	0.0499345	0.799973	0.116404	0.0822965
D.Dialister_invisus	193	0.380292	0.0714467	0.0128381	0.792512	0.149145	0.028778
D.Dialister_succinatiphilus	194	0.971715	8.45e-05	0.011713	0.99556	0.00313536	0.0267956
M.Megamonas_funiformis	195	0.349923	0.000637743	0.305666	0.774901	0.0106503	0.349655
M.Megamonas_hypermegale	196	0.854317	0.0452614	0.233859	0.96219	0.110345	0.278961
M.Megamonas_rupellensis	197	0.470539	0.104212	0.373998	0.831564	0.192302	0.415001
M.Megamonas_unclassified	198	0.726865	0.0186027	0.164926	0.902502	0.0658357	0.207869
M.Megasphaera_elsdenii	199	0.287849	0.0391115	0.0130904	0.737754	0.10181	0.0291479
M.Megasphaera_unclassified	200	0.935389	0.272512	0.394372	0.98321	0.395735	0.429057
M.Mitsuokella_multacida	201	0.494122	0.0863096	0.00635556	0.834377	0.170568	0.0176292
M.Mitsuokella_unclassified	202	0.783198	0.181787	0.939994	0.944361	0.297632	0.942816
S.Selenomonas_bovis	203	0.230167	0.596478	0.0123908	0.714891	0.691749	0.0279629
V.Veillonella_atypica	204	0.266521	0.0016362	0.00152284	0.723059	0.0182359	0.00572605
V.Veillonella_parvula	205	0.090759	0.00460468	0.00783762	0.652196	0.0307593	0.0201367
V.Veillonella_unclassified	206	0.70143	0.0371878	0.149761	0.894189	0.101225	0.194631
S.Sebaldella_termitidis	207	0.114884	6.55e-05	3.29e-05	0.652196	0.00313536	0.000500676
B.Brevundimonas_diminuta	208	0.995833	0.758575	0.245404	0.999176	0.814676	0.290656
B.Brevundimonas_unclassified	209	0.178327	0.680455	0.354636	0.680532	0.753311	0.394828
C.Caulobacter_unclassified	210	0.753281	0.00475569	0.265613	0.918686	0.0311451	0.310191
C.Caulobacter_vibrioides	211	0.341692	0.010392	0.766786	0.774901	0.0452333	0.776081
A.Afipia_unclassified	212	0.158629	0.115527	0.178616	0.680532	0.207451	0.221776
R.Rhodopseudomonas_palustris	213	0.116007	0.15397	0.569996	0.652196	0.25713	0.591238
O.Ochrobactrum_anthropi	214	0.365756	0.441021	0.196721	0.788027	0.553763	0.240677
A.Agrobacterium_unclassified	215	0.388575	0.568263	0.406153	0.792512	0.673049	0.438395
S.Sinorhizobium_unclassified	216	0.00904591	0.0303004	0.796766	0.335433	0.0897145	0.803987
P.Paracoccus_denitrificans	217	0.00657379	0.00243426	0.0587279	0.335433	0.0213959	0.0920188
P.Paracoccus_unclassified	218	0.136707	0.00274813	0.0219346	0.680532	0.022842	0.0438692
A.Acetobacter_unclassified	219	0.639146	0.750087	0.292921	0.881267	0.809454	0.338531
S.Sphingobium_unclassified	220	0.2636	0.594805	0.074352	0.723059	0.691749	0.110864
S.Sphingobium_yanoikuyae	221	0.852066	0.0130761	0.154983	0.96219	0.0526193	0.199094
S.Sphingopyxis_unclassified	222	0.0395465	0.942046	0.217411	0.598658	0.957132	0.262149
B.Burkholderia_unclassified	223	0.286435	0.809987	0.132499	0.737754	0.845424	0.174231
B.Burkholderia_vietnamiensis	224	0.180921	0.224261	0.000858575	0.680532	0.346775	0.0038918
R.Ralstonia_unclassified	225	0.410172	0.220338	0.0930952	0.805867	0.343893	0.130646
B.Burkholderiales_bacterium_1_1_47	226	0.162087	0.0911991	0.0201602	0.680532	0.176072	0.041565
T.Thiomonas_unclassified	227	0.274095	0.00565102	0.0859586	0.732382	0.0343223	0.123143
A.Acidovorax_delafieldii	228	0.4543	0.243117	0.0529142	0.831564	0.367425	0.0857929
A.Acidovorax_ebreus	229	0.484177	0.496298	0.0482822	0.831564	0.604976	0.0806313
A.Alicycliphilus_denitrificans	230	0.0986785	0.852374	0.0499945	0.652196	0.88414	0.0822965
A.Alicycliphilus_unclassified	231	0.0512005	0.0679961	1.23e-05	0.598658	0.145513	0.000437337
C.Comamonas_testosteroni	232	0.12272	0.0372775	0.12855	0.652196	0.101225	0.171058
C.Comamonas_unclassified	233	0.838351	0.167252	0.0149898	0.96219	0.275182	0.0327229
D.Delftia_acidovorans	234	0.53714	0.115132	0.000130956	0.83834	0.207451	0.00105839
D.Delftia_unclassified	235	0.314128	0.895785	0.0445221	0.754337	0.923433	0.0754842
P.Polaromonas_unclassified	236	0.500434	0.07862	0.542526	0.83834	0.159146	0.566262
V.Variovorax_unclassified	237	0.860756	0.920485	0.575855	0.96219	0.940189	0.595466
V.Verminephrobacter_unclassified	238	0.508737	0.594583	0.253176	0.83834	0.691749	0.297749
H.Herbaspirillum_unclassified	239	0.355518	0.102526	0.07302	0.774901	0.192302	0.109859
J.Janthinobacterium_lividum	240	0.238677	0.262326	0.00320909	0.714891	0.387883	0.010208
J.Janthinobacterium_unclassified	241	0.240693	0.431491	0.0106014	0.714891	0.548958	0.0245895
P.Parasutterella_excrementihominis	242	0.525835	0.122727	0.0568533	0.83834	0.218036	0.0904238
S.Sutterella_wadsworthensis	243	0.0160549	0.00354373	0.0189057	0.383024	0.0263024	0.0397139
A.Aquaspirillum_serpens	244	0.552715	0.37734	0.115574	0.846649	0.500126	0.155652
K.Kingella_unclassified	245	0.575792	0.606165	0.0993278	0.851317	0.698135	0.137658
L.Laribacter_hongkongensis	246	0.985152	0.444262	0.000559569	0.999176	0.555743	0.00287532
N.Neisseria_unclassified	247	0.0490662	0.15942	0.00047863	0.598658	0.264906	0.0025375
A.Azoarcus_unclassified	248	0.0978591	0.248821	0.38377	0.652196	0.374352	0.424435
A.Azospira_oryzae	249	0.301928	0.0328495	0.043602	0.739863	0.0937754	0.0750674
D.Dechloromonas_aromatica	250	0.170013	0.04639	0.331925	0.680532	0.110673	0.375806
M.Methyloversatilis_unclassified	251	0.672311	0.728951	0.852258	0.891079	0.793061	0.857392
T.Thauera_aminoaromatica	252	0.0798376	0.0550983	0.564686	0.652196	0.125189	0.587555
T.Thauera_phenylacetica	253	0.35535	0.100147	0.0283799	0.774901	0.188978	0.053553
T.Thauera_selenatis	254	0.0680106	0.300852	0.0319674	0.649016	0.427593	0.0589895
T.Thauera_terpenica	255	0.138295	0.010428	0.00284285	0.680532	0.0452333	0.00921855
T.Thauera_unclassified	256	0.555138	0.906923	0.658672	0.846649	0.932038	0.674835
B.Bilophila_unclassified	257	0.415889	0.726728	0.00696117	0.812321	0.793061	0.0186003
B.Bilophila_wadsworthia	258	0.684745	0.56816	0.135196	0.893379	0.673049	0.177081
D.Desulfovibrio_desulfuricans	259	0.4055	0.113779	0.0120472	0.801401	0.207451	0.0273725
D.Desulfovibrio_magneticus	260	0.829272	0.0501862	0.0250673	0.961726	0.116404	0.0481178
D.Desulfovibrio_piger	261	0.161622	0.45817	0.179752	0.680532	0.56888	0.22236
P.Pelobacter_propionicus	262	0.202712	0.281205	0.118116	0.698124	0.404838	0.157803
A.Arcobacter_butzleri	263	0.117438	0.205594	0.0230675	0.652196	0.326607	0.0453091
A.Arcobacter_unclassified	264	0.0783016	0.652758	0.00119658	0.652196	0.734078	0.00511738
S.Sulfurospirillum_unclassified	265	0.279533	0.737563	0.0866423	0.737754	0.799824	0.123143
A.Aeromonas_aquariorum	266	0.520131	0.0733391	0.45756	0.83834	0.150635	0.486703
A.Aeromonas_caviae	267	0.778217	0.515353	0.152113	0.941756	0.6214	0.196921
A.Aeromonas_hydrophila	268	0.402987	0.788516	0.280011	0.801176	0.836159	0.324736
A.Aeromonas_media	269	0.649077	0.00647397	0.0177213	0.881267	0.0343223	0.0379418
A.Aeromonas_molluscorum	270	0.145782	0.0162771	0.169804	0.680532	0.0597421	0.212414
A.Aeromonas_salmonicida	271	0.340392	0.328343	0.432349	0.774901	0.451302	0.462835
A.Aeromonas_unclassified	272	0.604893	0.261022	0.395802	0.874607	0.387883	0.429214
A.Aeromonas_veronii	273	0.922212	0.293051	0.300065	0.98321	0.418286	0.345592
T.Tolumonas_auensis	274	0.640514	0.254978	0.0684681	0.881267	0.381896	0.103947
S.Shewanella_unclassified	275	0.991733	0.0521182	0.0540095	0.999176	0.119229	0.0867268
C.Citrobacter_freundii	276	0.30109	0.264782	2.31e-05	0.739863	0.387883	0.000500676
C.Citrobacter_unclassified	277	0.57859	0.984347	0.0113631	0.851317	0.987303	0.0261743
C.Cronobacter_sakazakii	278	0.857511	0.207505	0.177735	0.96219	0.326919	0.221505
E.Enterobacter_asburiae	279	0.635257	7.98e-05	0.455442	0.881267	0.00313536	0.485999
E.Enterobacter_cloacae	280	0.0400946	0.00171928	0.000158628	0.598658	0.018251	0.00112727
E.Enterobacter_hormaechei	281	0.227464	0.0818812	0.0696594	0.714891	0.164749	0.105277
E.Enterobacter_mori	282	0.512771	0.119836	0.0100342	0.83834	0.214038	0.0237689
E.Escherichia_coli	283	0.899816	0.0683999	0.00410036	0.97326	0.145513	0.012338
E.Escherichia_unclassified	284	0.220857	0.0204078	0.0571288	0.714891	0.0702702	0.0904314
K.Klebsiella_oxytoca	285	0.0544647	0.0409682	0.00901445	0.598658	0.103684	0.0223024
K.Klebsiella_pneumoniae	286	0.804914	0.0740512	0.00684763	0.953338	0.150811	0.0184444
K.Klebsiella_unclassified	287	0.62958	0.432263	0.326979	0.881267	0.548958	0.371466
M.Morganella_morganii	288	0.953331	0.0430413	0.0330586	0.986893	0.107282	0.0603366
R.Rahnella_unclassified	289	0.57714	0.0735135	0.0683028	0.851317	0.150635	0.103947
R.Raoultella_ornithinolytica	290	0.0100429	6.7e-05	0.0900665	0.335433	0.00313536	0.127467
Y.Yersinia_unclassified	291	0.697115	0.0274938	0.063315	0.894189	0.0858217	0.0979038
H.Haemophilus_parainfluenzae	292	0.0555641	0.000210174	0.00644122	0.598658	0.00638164	0.0176292
A.Acinetobacter_baumannii	293	0.981994	0.0460086	2.41e-06	0.999176	0.110673	0.000200836
A.Acinetobacter_bereziniae	294	0.64714	0.311022	0.00281757	0.881267	0.437612	0.00921855
A.Acinetobacter_bouvetii	295	0.567904	0.00394477	0.0336019	0.850583	0.0280331	0.0609947
A.Acinetobacter_brisouii	296	0.0133256	0.484035	1.55e-05	0.383024	0.594366	0.000437337
A.Acinetobacter_gerneri	297	0.35729	0.669791	0.0303661	0.774901	0.748886	0.056346
A.Acinetobacter_guillouiae	298	0.530535	0.0574614	0.0361074	0.83834	0.128806	0.064838
A.Acinetobacter_indicus	299	0.0474565	0.316615	0.00946934	0.598658	0.442466	0.0230327
A.Acinetobacter_johnsonii	300	0.0426728	0.000300042	0.000121076	0.598658	0.00698491	0.00105414
A.Acinetobacter_junii	301	0.545189	0.681138	3.7e-06	0.846649	0.753311	0.000247054
A.Acinetobacter_lwoffii	302	0.200427	0.00430525	0.196596	0.698124	0.0299573	0.240677
A.Acinetobacter_parvus	303	0.562801	0.79153	0.024247	0.850568	0.836159	0.0468121
A.Acinetobacter_pittii_calcoaceticus_nosocomialis	304	0.970635	0.0167856	0.000123088	0.99556	0.0602839	0.00105414
A.Acinetobacter_schindleri	305	0.709461	0.0935409	0.0474963	0.897576	0.179555	0.0797175
A.Acinetobacter_sp_ANC_3994	306	0.118558	0.0139498	0.24332	0.652196	0.0538593	0.289214
A.Acinetobacter_sp_CIP_102129	307	0.615294	0.523859	0.0863437	0.881267	0.629385	0.123143
A.Acinetobacter_sp_NIPH_284	308	0.602997	0.236362	0.00319825	0.874607	0.360478	0.010208
A.Acinetobacter_tandoii	309	0.250369	0.987929	0.000444816	0.715394	0.987929	0.00247614
A.Acinetobacter_tjernbergiae	310	0.303477	0.00627297	0.027918	0.739863	0.0343223	0.0532834
A.Acinetobacter_towneri	311	0.726526	0.138304	0.00350252	0.902502	0.237877	0.0110362
A.Acinetobacter_unclassified	312	0.856995	0.268815	0.0211877	0.96219	0.392071	0.0431506
A.Acinetobacter_ursingii	313	0.44115	0.774895	0.0916072	0.831564	0.829535	0.1291
E.Enhydrobacter_aerosaccus	314	0.0303695	0.467731	0.663669	0.563523	0.5786	0.677876
P.Pseudomonas_alcaligenes	315	0.37025	0.0900565	0.219548	0.788027	0.175183	0.263773
P.Pseudomonas_extremaustralis	316	0.00956549	0.394878	0.0013035	0.335433	0.518497	0.00524543
P.Pseudomonas_fragi	317	0.0228177	0.00280395	0.0500218	0.47563	0.022842	0.0822965
P.Pseudomonas_mandelii	318	0.578394	0.0724597	0.352424	0.851317	0.15032	0.393678
P.Pseudomonas_mendocina	319	0.859383	0.0058618	0.112382	0.96219	0.0343223	0.152097
P.Pseudomonas_monteilii	320	0.914512	0.594075	0.393891	0.982145	0.691749	0.429057
P.Pseudomonas_nitroreducens	321	0.476349	0.0224128	0.109976	0.831564	0.0748588	0.150541
P.Pseudomonas_protegens	322	0.00831475	0.311831	0.0984652	0.335433	0.437612	0.137031
P.Pseudomonas_putida	323	0.0594175	0.916915	0.0132304	0.62017	0.939416	0.0292104
P.Pseudomonas_stutzeri	324	0.660615	0.588851	0.714926	0.886126	0.691749	0.725791
P.Pseudomonas_unclassified	325	0.0497126	0.840272	0.0999699	0.598658	0.874301	0.137975
P.Pseudoxanthomonas_unclassified	326	0.485721	0.375632	0.0795315	0.831564	0.499844	0.117213
S.Stenotrophomonas_maltophilia	327	0.937964	0.610511	0.00176734	0.98321	0.700724	0.00634724
S.Stenotrophomonas_unclassified	328	0.43907	0.0412875	0.00722093	0.831564	0.103684	0.0189905
A.Aminomonas_paucivorans	329	0.644643	0.0635383	3.09e-07	0.881267	0.139617	5.17e-05
A.Akkermansia_muciniphila	330	0.30584	0.635694	0.00484398	0.740221	0.722381	0.0140686
B.Bppunalikevirus_unclassified	331	0.201268	0.212065	0.0063037	0.698124	0.332533	0.0176292
C.C2likevirus_unclassified	332	0.695967	0.231211	0.189623	0.894189	0.355873	0.233705
Y.Yualikevirus_unclassified	333	0.316189	0.115365	0.0105667	0.754337	0.207451	0.0245895
M.Human_adenovirus_D	334	0.819461	0.332125	0.215335	0.956993	0.454631	0.260586
PCE_ATE	indexes	pValuesSource	pValuesLocation	pValuesTimepoint	pValuesSourceAdjusted	pValuesLocationAdjusted	pValuesTimepointAdjusted
M.Methanobrevibacter_smithii	1	0.330359	0.350152	0.830696	0.355136	0.529901	0.880076
M.Methanobrevibacter_unclassified	2	0.0250269	0.646898	0.496788	0.0357018	0.772684	0.667571
M.Methanosaeta_concilii	3	0.0632113	0.237206	0.196632	0.0764121	0.446756	0.546634
M.Methanosaeta_unclassified	4	0.191815	0.69511	0.115252	0.213838	0.79295	0.532136
G.Gordonia_amarae	5	0.0349449	0.468602	0.772683	0.0475946	0.641133	0.835712
T.Tetrasphaera_elongata	6	0.014219	0.0137535	0.933112	0.0218364	0.294806	0.936222
L.Leifsonia_unclassified	7	0.510991	0.771519	0.667286	0.535918	0.847545	0.771837
L.Leucobacter_unclassified	8	0.902917	0.266408	0.952156	0.905927	0.477315	0.952156
K.Kocuria_rhizophila	9	0.0283227	0.536806	0.125357	0.0394683	0.695324	0.532136
K.Kocuria_unclassified	10	0.0769728	0.805921	0.507642	0.090151	0.875748	0.675926
N.Nakamurella_multipartita	11	0.107691	0.12601	0.520228	0.123721	0.346499	0.68065
R.Rhodococcus_erythropolis	12	0.419838	0.116553	0.255868	0.44497	0.346499	0.546634
N.Nocardioides_unclassified	13	0.0555114	0.31843	0.0596987	0.0684793	0.515409	0.532136
M.Microlunatus_phosphovorus	14	0.313915	0.259202	0.343398	0.339886	0.472848	0.59884
P.Propionibacterium_acnes	15	0.533488	0.400704	0.46902	0.55564	0.577091	0.656651
B.Bifidobacterium_adolescentis	16	0.00379622	0.405951	0.305021	0.00764212	0.581863	0.575675
B.Bifidobacterium_angulatum	17	0.000801789	0.84125	0.0913515	0.00214256	0.904343	0.532136
B.Bifidobacterium_bifidum	18	2.55e-05	0.101448	0.180712	0.00025013	0.337665	0.546634
B.Bifidobacterium_breve	19	0.000852422	0.118095	0.242053	0.00225069	0.346499	0.546634
B.Bifidobacterium_catenulatum	20	7.52e-05	0.120935	0.16196	0.000468611	0.346499	0.537124
B.Bifidobacterium_longum	21	0.00380837	0.477128	0.375303	0.00764212	0.646917	0.599523
B.Bifidobacterium_pseudocatenulatum	22	2.65e-05	0.364787	0.0961588	0.00025013	0.54089	0.532136
B.Bifidobacterium_thermophilum	23	0.00843127	0.733773	0.150111	0.0145018	0.821062	0.537124
G.Gardnerella_vaginalis	24	0.0119031	0.516692	0.138721	0.0192625	0.685129	0.535319
A.Adlercreutzia_equolifaciens	25	1.49e-05	0.686419	0.218309	0.000234056	0.79295	0.546634
C.Collinsella_aerofaciens	26	0.000312332	0.675617	0.152113	0.00109327	0.785177	0.537124
C.Collinsella_intestinalis	27	0.00372786	0.87503	0.0971229	0.00758167	0.920923	0.532136
E.Eggerthella_lenta	28	0.00355842	0.643589	0.109823	0.00728629	0.771964	0.532136
E.Eggerthella_unclassified	29	7.97e-05	0.522395	0.117389	0.000468611	0.686642	0.532136
G.Gordonibacter_pamelaeae	30	0.020466	0.963912	0.100502	0.0296166	0.976894	0.532136
B.Bacteroides_caccae	31	0.000355041	0.0601065	0.000794292	0.00117095	0.294806	0.0968177
B.Bacteroides_cellulosilyticus	32	0.00456694	0.318492	0.111162	0.00881185	0.515409	0.532136
B.Bacteroides_clarus	33	0.000901791	0.188081	0.15587	0.00233999	0.398103	0.537124
B.Bacteroides_coprocola	34	0.000177483	0.0722728	0.21424	0.000741977	0.294806	0.546634
B.Bacteroides_coprophilus	35	0.000685051	0.0505956	0.266295	0.00194529	0.294806	0.55663
B.Bacteroides_dorei	36	7.23e-05	0.0256647	0.00096496	0.000468611	0.294806	0.0968177
B.Bacteroides_eggerthii	37	0.000312363	0.0957419	0.108098	0.00109327	0.328212	0.532136
B.Bacteroides_faecis	38	0.000306002	0.0464253	0.0124812	0.00109327	0.294806	0.341532
B.Bacteroides_finegoldii	39	0.000341582	0.282943	0.112504	0.00116837	0.492045	0.532136
B.Bacteroides_fragilis	40	0.00330249	0.153097	0.228933	0.00680856	0.380388	0.546634
B.Bacteroides_intestinalis	41	0.000578616	0.207304	0.119846	0.00172439	0.418783	0.532136
B.Bacteroides_massiliensis	42	9.98e-05	0.0223841	0.00836948	0.000518036	0.294806	0.308402
B.Bacteroides_ovatus	43	0.00711629	0.17565	0.0017001	0.0124535	0.38719	0.127933
B.Bacteroides_plebeius	44	0.00121487	0.0502727	0.272297	0.002949	0.294806	0.561379
B.Bacteroides_salyersiae	45	0.00585087	0.168207	0.217276	0.0108711	0.38649	0.546634
B.Bacteroides_sp_4_3_47FAA	46	0.000235365	0.0786631	0.20487	0.000908269	0.303559	0.546634
B.Bacteroides_stercoris	47	0.000289074	0.0814213	0.0181062	0.00105313	0.310225	0.389283
B.Bacteroides_thetaiotaomicron	48	0.00433498	0.559324	0.00435978	0.00841825	0.710365	0.262459
B.Bacteroides_uniformis	49	0.000957371	0.104328	0.000546199	0.00244824	0.337665	0.0968177
B.Bacteroides_vulgatus	50	0.000732369	0.0493407	0.0103779	0.00202689	0.294806	0.312376
B.Bacteroides_xylanisolvens	51	0.00187391	0.235694	0.0254635	0.00433883	0.446756	0.450853
B.Bacteroidales_bacterium_ph8	52	0.000545557	0.20019	0.151318	0.00164213	0.409912	0.537124
B.Barnesiella_intestinihominis	53	0.000209023	0.172038	0.118612	0.000838881	0.38719	0.532136
C.Coprobacter_fastidiosus	54	0.039071	0.185957	0.243171	0.0522683	0.396973	0.546634
D.Dysgonomonas_mossii	55	0.000674912	0.428048	0.524621	0.00193475	0.602067	0.68065
O.Odoribacter_laneus	56	0.00706297	0.109782	0.247434	0.0124535	0.344213	0.546634
P.Parabacteroides_distasonis	57	1.85e-05	0.0508007	0.0493512	0.000242413	0.294806	0.532136
P.Parabacteroides_goldsteinii	58	0.00175974	0.0691414	0.302024	0.00410606	0.294806	0.575374
P.Parabacteroides_johnsonii	59	5.58e-05	0.268285	0.109413	0.00038011	0.477834	0.532136
P.Parabacteroides_merdae	60	1.66e-05	0.068466	0.0451401	0.000234056	0.294806	0.532136
P.Parabacteroides_sp_20_3	61	0.00663641	0.0627336	0.224611	0.011897	0.294806	0.546634
P.Parabacteroides_unclassified	62	0.676762	0.118572	0.68667	0.692875	0.346499	0.785884
P.Paraprevotella_clara	63	0.00207247	0.325066	0.102273	0.00472585	0.520451	0.532136
P.Paraprevotella_unclassified	64	9.88e-05	0.250452	0.101441	0.000518036	0.459671	0.532136
P.Paraprevotella_xylaniphila	65	0.00976502	0.64373	0.0742641	0.0164205	0.771964	0.532136
P.Prevotella_copri	66	0.000214491	0.0445306	0.014509	0.000849498	0.294806	0.363933
P.Prevotella_paludivivens	67	0.00217411	0.072036	0.0177164	0.00484746	0.294806	0.389283
P.Prevotella_stercorea	68	0.0312657	0.176229	0.218895	0.0433685	0.38719	0.546634
A.Alistipes_finegoldii	69	0.000245985	0.131232	0.145017	0.000937233	0.346499	0.537124
A.Alistipes_indistinctus	70	9.89e-05	0.130179	0.226597	0.000518036	0.346499	0.546634
A.Alistipes_onderdonkii	71	0.000137403	0.224638	0.0748514	0.000626934	0.441934	0.532136
A.Alistipes_putredinis	72	2.17e-05	0.0853613	0.0524705	0.00025013	0.319431	0.532136
A.Alistipes_senegalensis	73	0.00406034	0.182479	0.171049	0.00796787	0.395152	0.537363
A.Alistipes_shahii	74	0.000139645	0.127572	0.128815	0.000626934	0.346499	0.532136
C.Chryseobacterium_gleum	75	0.0930832	0.821523	0.783519	0.107762	0.889491	0.842283
C.Chryseobacterium_unclassified	76	0.0417293	0.342143	0.874619	0.0543745	0.525433	0.8985
E.Empedobacter_brevis	77	0.0409617	0.0615621	0.66742	0.0540766	0.294806	0.771837
M.Myroides_unclassified	78	0.0423128	0.147452	0.029495	0.0548972	0.369859	0.493222
R.Riemerella_unclassified	79	0.0490562	0.38543	0.232331	0.0625675	0.560455	0.546634
F.Flavobacteria_bacterium_BAL38	80	0.26943	0.156431	0.473399	0.297064	0.380388	0.656651
P.Pedobacter_unclassified	81	0.298739	0.262539	0.459947	0.325798	0.473198	0.656133
S.Sphingobacterium_unclassified	82	0.0177522	0.137945	0.149619	0.0261932	0.354883	0.537124
C.Candidatus_Cloacimonas_acidaminovorans	83	0.707224	0.0194668	0.82769	0.721608	0.294806	0.880076
E.Enterococcus_cecorum	84	0.00593102	0.0202556	0.89102	0.0109524	0.294806	0.909142
E.Enterococcus_faecalis	85	0.102377	0.535758	0.242424	0.118067	0.695324	0.546634
E.Enterococcus_faecium	86	0.0120659	0.400361	0.248932	0.0193183	0.577091	0.546634
L.Lactobacillus_casei_paracasei	87	0.0280219	0.655064	0.370891	0.0392307	0.776277	0.599523
L.Lactobacillus_delbrueckii	88	0.00108	0.220118	0.547115	0.00273177	0.436839	0.693507
L.Lactobacillus_fermentum	89	4.98e-05	0.447239	0.421068	0.000364718	0.623723	0.642583
L.Lactobacillus_gasseri	90	0.0384259	0.663599	0.277413	0.0518664	0.778212	0.568035
L.Lactobacillus_mucosae	91	0.0536905	0.133899	0.354271	0.0670574	0.350233	0.599523
L.Lactobacillus_plantarum	92	0.0343988	0.924234	0.653074	0.0470638	0.943032	0.764885
L.Lactobacillus_reuteri	93	0.000671341	0.489606	0.101518	0.00193475	0.657908	0.532136
L.Lactobacillus_ruminis	94	0.00296827	0.019428	0.762071	0.00633652	0.294806	0.831099
L.Lactobacillus_salivarius	95	3.11e-05	0.573806	0.447438	0.000284003	0.716207	0.656133
L.Leuconostoc_lactis	96	0.0131212	0.0397136	0.842066	0.0206779	0.294806	0.880076
L.Leuconostoc_pseudomesenteroides	97	0.00913772	0.575821	0.0888968	0.0154709	0.716207	0.532136
L.Leuconostoc_unclassified	98	0.122008	0.450348	0.445143	0.137545	0.624676	0.656133
L.Lactococcus_lactis	99	0.000128708	0.185237	0.462474	0.000611564	0.396973	0.656626
L.Lactococcus_raffinolactis	100	0.0110459	0.354659	0.025454	0.0182755	0.529901	0.450853
S.Streptococcus_ferus	101	0.121382	0.270591	0.0604539	0.137353	0.478698	0.532136
S.Streptococcus_infantarius	102	0.00144643	0.0655456	0.756913	0.00340137	0.294806	0.828786
S.Streptococcus_lutetiensis	103	0.00325138	0.634645	0.237862	0.00674942	0.770275	0.546634
S.Streptococcus_macedonicus	104	0.0129964	0.334219	0.483131	0.020589	0.525433	0.664029
S.Streptococcus_parasanguinis	105	8.72e-06	0.198967	0.184746	0.000218727	0.409912	0.546634
S.Streptococcus_salivarius	106	8.44e-05	0.354625	0.208494	0.000479338	0.529901	0.546634
S.Streptococcus_suis	107	0.00709811	0.45418	0.0338323	0.0124535	0.627102	0.509176
S.Streptococcus_thermophilus	108	5.98e-06	0.289342	0.10369	0.000179997	0.492045	0.532136
S.Streptococcus_vestibularis	109	0.0139764	0.498078	0.836996	0.0215953	0.666317	0.880076
C.Clostridium_bolteae	110	1.42e-05	0.353935	0.171385	0.000234056	0.529901	0.537363
C.Clostridium_clostridioforme	111	8.97e-05	0.355614	0.121242	0.000490983	0.529901	0.532136
C.Clostridium_hathewayi	112	0.0128767	0.120265	0.323037	0.0205073	0.346499	0.578774
C.Clostridium_leptum	113	7.82e-05	0.0453786	0.608479	0.000468611	0.294806	0.72969
C.Clostridium_nexile	114	7.44e-05	0.038225	0.458681	0.000468611	0.294806	0.656133
C.Clostridium_scindens	115	0.02752	0.239387	0.137251	0.038708	0.446756	0.535319
C.Clostridium_symbiosum	116	0.00263146	0.203501	0.293553	0.00578153	0.413877	0.575374
C.Clostridiales_bacterium_1_7_47FAA	117	0.0331177	0.98908	0.382432	0.0455179	0.990915	0.605853
E.Eubacterium_eligens	118	0.000590348	0.0686719	0.280715	0.00174211	0.294806	0.568608
E.Eubacterium_hallii	119	0.000339742	0.196456	0.123874	0.00116837	0.409912	0.532136
E.Eubacterium_ramulus	120	0.000252362	0.0448367	0.418507	0.000949514	0.294806	0.642583
E.Eubacterium_rectale	121	5.07e-05	0.0163498	0.117554	0.000364718	0.294806	0.532136
E.Eubacterium_siraeum	122	2.51e-05	0.0507644	0.864619	0.00025013	0.294806	0.897415
E.Eubacterium_sp_3_1_31	123	0.00079127	0.0743727	0.858372	0.00214256	0.294806	0.894014
E.Eubacterium_ventriosum	124	0.000467655	0.0372423	0.349459	0.00145118	0.294806	0.59884
A.Anaerostipes_hadrus	125	0.000128316	0.157968	0.128046	0.000611564	0.380388	0.532136
B.Blautia_hydrogenotrophica	126	0.00134354	0.3249	0.373876	0.00323525	0.520451	0.599523
B.Blautia_producta	127	0.0120356	0.261044	0.169172	0.0193183	0.473198	0.537363
B.Ruminococcus_gnavus	128	1.4e-06	0.0627818	0.43539	0.000162099	0.294806	0.648774
B.Ruminococcus_obeum	129	2.34e-05	0.0970461	0.396225	0.00025013	0.328212	0.615654
B.Ruminococcus_torques	130	0.000357899	0.0187035	0.29628	0.00117095	0.294806	0.575374
C.Coprococcus_catus	131	0.000149314	0.0434561	0.591694	0.00064205	0.294806	0.721052
C.Coprococcus_comes	132	2.05e-05	0.106468	0.228194	0.00025013	0.339301	0.546634
C.Coprococcus_eutactus	133	0.0205933	0.0650706	0.602134	0.0296582	0.294806	0.72788
D.Dorea_formicigenerans	134	3.63e-05	0.0865503	0.320849	0.000311543	0.319431	0.578774
D.Dorea_longicatena	135	1.56e-05	0.0335793	0.249464	0.000234056	0.294806	0.546634
D.Dorea_unclassified	136	0.0176131	0.458613	0.326623	0.026116	0.630332	0.581736
L.Lachnospiraceae_bacterium_1_4_56FAA	137	0.0040464	0.173094	0.452841	0.00796787	0.38719	0.656133
L.Lachnospiraceae_bacterium_2_1_58FAA	138	0.000804349	0.544489	0.257881	0.00214256	0.699654	0.546634
L.Lachnospiraceae_bacterium_3_1_46FAA	139	2.21e-05	0.059324	0.453554	0.00025013	0.294806	0.656133
L.Lachnospiraceae_bacterium_3_1_57FAA_CT1	140	0.00314633	0.160921	0.34052	0.00662269	0.381395	0.59884
L.Lachnospiraceae_bacterium_4_1_37FAA	141	0.0193455	0.0317426	0.669268	0.0282669	0.294806	0.771837
L.Lachnospiraceae_bacterium_5_1_57FAA	142	0.0746284	0.198634	0.344931	0.0884376	0.409912	0.59884
L.Lachnospiraceae_bacterium_5_1_63FAA	143	4.34e-05	0.0713803	0.212831	0.000343785	0.294806	0.546634
L.Lachnospiraceae_bacterium_6_1_63FAA	144	0.00865764	0.167917	0.492811	0.0148065	0.38649	0.667571
L.Lachnospiraceae_bacterium_7_1_58FAA	145	1.41e-05	0.116436	0.162451	0.000234056	0.346499	0.537124
L.Lachnospiraceae_bacterium_9_1_43BFAA	146	0.038835	0.107088	0.36349	0.0521845	0.339301	0.599523
R.Roseburia_hominis	147	0.000959775	0.095235	0.245633	0.00244824	0.328212	0.546634
R.Roseburia_intestinalis	148	0.0112918	0.140109	0.221282	0.0184133	0.357398	0.546634
R.Roseburia_inulinivorans	149	0.000155128	0.0421777	0.310778	0.000657656	0.294806	0.577434
O.Oscillibacter_unclassified	150	0.000104686	0.0637609	0.365396	0.000534074	0.294806	0.599523
P.Clostridium_sticklandii	151	0.000290398	0.211216	0.208593	0.00105313	0.423839	0.546634
P.Peptostreptococcaceae_noname_unclassified	152	0.00121412	0.247288	0.715508	0.002949	0.456649	0.809654
F.Faecalibacterium_prausnitzii	153	0.000193172	0.124597	0.255424	0.000796506	0.346499	0.546634
R.Ruminococcaceae_bacterium_D16	154	0.00914888	0.128844	0.366218	0.0154709	0.346499	0.599523
R.Ruminococcus_bromii	155	0.000485867	0.171069	0.550658	0.00149231	0.38719	0.693507
R.Ruminococcus_callidus	156	0.000350852	0.034544	0.427714	0.00117095	0.294806	0.64371
R.Ruminococcus_lactaris	157	8.1e-05	0.0470037	0.613788	0.000468611	0.294806	0.731763
R.Ruminococcus_sp_5_1_39BFAA	158	1.48e-05	0.0564984	0.300507	0.000234056	0.294806	0.575374
S.Subdoligranulum_unclassified	159	5.09e-05	0.0308696	0.20586	0.000364718	0.294806	0.546634
C.Catenibacterium_mitsuokai	160	1.95e-06	0.129694	0.344678	0.000162099	0.346499	0.59884
C.Coprobacillus_unclassified	161	5.45e-06	0.0647335	0.375203	0.000179997	0.294806	0.599523
E.Clostridium_ramosum	162	0.0254287	0.881208	0.184566	0.0359345	0.921508	0.546634
E.Erysipelotrichaceae_bacterium_6_1_45	163	0.0198523	0.116192	0.757196	0.0288673	0.346499	0.828786
E.Eubacterium_biforme	164	1.21e-05	0.123885	0.491691	0.000234056	0.346499	0.667571
H.Holdemania_unclassified	165	0.0208613	0.538241	0.253968	0.0299012	0.695324	0.546634
A.Acidaminococcus_intestini	166	9.7e-06	0.0401767	0.529701	0.000224585	0.294806	0.684292
A.Acidaminococcus_unclassified	167	0.00112231	0.779504	0.161579	0.00281512	0.852158	0.537124
P.Phascolarctobacterium_succinatutens	168	1.64e-06	0.520811	0.157029	0.000162099	0.686642	0.537124
A.Anaeromusa_acidaminophila	169	0.00209617	0.167885	0.449163	0.00474397	0.38649	0.656133
D.Dialister_invisus	170	0.000115538	0.340175	0.3478	0.000570116	0.525433	0.59884
D.Dialister_succinatiphilus	171	0.00276561	0.0466287	0.524139	0.00598883	0.294806	0.68065
M.Megamonas_funiformis	172	0.000885478	0.0251606	0.741772	0.00231764	0.294806	0.823887
M.Megamonas_hypermegale	173	3.73e-05	0.302887	0.321822	0.000311543	0.501541	0.578774
M.Megamonas_rupellensis	174	1.71e-05	0.0276946	0.533057	0.000234056	0.294806	0.685685
M.Megamonas_unclassified	175	0.0796146	0.271951	0.506836	0.092525	0.478698	0.675926
M.Megasphaera_elsdenii	176	0.00407658	0.309773	0.241857	0.00796787	0.509467	0.546634
M.Megasphaera_unclassified	177	0.00120279	0.658436	0.422696	0.002949	0.777213	0.642583
M.Mitsuokella_multacida	178	0.0106464	0.296132	0.587655	0.0178031	0.497965	0.71973
M.Mitsuokella_unclassified	179	0.430979	0.474315	0.471161	0.455175	0.646013	0.656651
S.Selenomonas_bovis	180	4.56e-06	0.74942	0.134152	0.000175491	0.832381	0.534861
V.Veillonella_parvula	181	7.81e-06	0.0398665	0.374736	0.000213615	0.294806	0.599523
V.Veillonella_unclassified	182	3.23e-06	0.293398	0.521932	0.000162099	0.496139	0.68065
S.Sebaldella_termitidis	183	1.66e-05	0.141742	0.159455	0.000234056	0.358524	0.537124
N.Candidatus_Nitrospira_defluvii	184	0.0139857	0.240447	0.204568	0.0215953	0.446756	0.546634
B.Brevundimonas_diminuta	185	0.0007202	0.569318	0.808544	0.00202598	0.714019	0.866092
B.Brevundimonas_unclassified	186	0.29808	0.157204	0.316526	0.325798	0.380388	0.577439
C.Caulobacter_unclassified	187	0.00265843	0.0611209	0.840309	0.00579846	0.294806	0.880076
C.Caulobacter_vibrioides	188	0.114007	0.233696	0.140993	0.129986	0.446756	0.537124
A.Afipia_broomeae	189	0.0503771	0.285486	0.491471	0.063981	0.492045	0.667571
A.Afipia_clevelandensis	190	0.00213977	0.0540675	0.727713	0.0048065	0.294806	0.817319
A.Afipia_unclassified	191	5.68e-05	0.189132	0.376444	0.00038011	0.398103	0.599523
R.Rhodopseudomonas_palustris	192	0.00671984	0.664453	0.111291	0.0119685	0.778212	0.532136
H.Hyphomicrobium_denitrificans	193	0.00628863	0.759985	0.104759	0.0114029	0.838777	0.532136
H.Hyphomicrobium_unclassified	194	0.00308732	0.631253	0.100709	0.00654425	0.770275	0.532136
M.Mesorhizobium_unclassified	195	0.0111259	0.94841	0.0826164	0.0183	0.964431	0.532136
P.Paracoccus_denitrificans	196	0.63789	0.0559192	0.470785	0.655307	0.294806	0.656651
P.Paracoccus_unclassified	197	0.0318066	0.0409648	0.316536	0.0439165	0.294806	0.577439
R.Reyranella_massiliensis	198	0.00610482	0.55777	0.164171	0.0111367	0.710365	0.537124
H.Holospora_unclassified	199	0.0525559	0.287051	0.476314	0.0661896	0.492045	0.657663
S.Sphingobium_unclassified	200	0.00322089	0.411217	0.53901	0.00673255	0.586618	0.688992
S.Sphingobium_xenophagum	201	0.0113171	0.0227266	0.840159	0.0184133	0.294806	0.880076
S.Sphingopyxis_unclassified	202	3.49e-05	0.0966499	0.224676	0.000308605	0.328212	0.546634
B.Bordetella_unclassified	203	0.612176	0.856608	0.730739	0.633213	0.912203	0.817668
B.Burkholderia_unclassified	204	0.076294	0.640806	0.252859	0.0899573	0.771964	0.546634
P.Polynucleobacter_necessarius	205	0.0554384	0.0651835	0.572712	0.0684793	0.294806	0.71234
R.Ralstonia_unclassified	206	0.303248	0.311435	0.915447	0.329522	0.509467	0.927777
B.Burkholderiales_bacterium_1_1_47	207	0.000613069	0.0953785	0.350152	0.00179159	0.328212	0.59884
T.Thiomonas_unclassified	208	0.826052	0.725607	0.514315	0.837177	0.814954	0.678985
A.Acidovorax_delafieldii	209	0.00140988	0.370005	0.246566	0.00336805	0.545939	0.546634
A.Acidovorax_ebreus	210	0.000223959	0.828302	0.0950075	0.000875475	0.893616	0.532136
A.Alicycliphilus_denitrificans	211	0.0412448	0.0440329	0.647919	0.0542126	0.294806	0.764764
A.Alicycliphilus_unclassified	212	5.27e-05	0.606366	0.0581168	0.000369079	0.751095	0.532136
C.Comamonas_testosteroni	213	3.11e-06	0.372274	0.820607	0.000162099	0.546607	0.875897
C.Comamonas_unclassified	214	0.486345	0.50371	0.00666947	0.511853	0.67087	0.286787
D.Delftia_acidovorans	215	0.00399887	0.174734	0.118262	0.00796787	0.38719	0.532136
D.Delftia_unclassified	216	4.66e-06	0.120246	0.170288	0.000175491	0.346499	0.537363
L.Limnohabitans_unclassified	217	8.82e-05	0.691426	0.130824	0.000490983	0.79295	0.532136
P.Polaromonas_unclassified	218	2.66e-05	0.0472177	0.299273	0.00025013	0.294806	0.575374
V.Variovorax_unclassified	219	0.000439248	0.568478	0.3968	0.00139172	0.714019	0.615654
V.Verminephrobacter_unclassified	220	0.0434168	0.563231	0.604609	0.0558481	0.712321	0.727949
J.Janthinobacterium_unclassified	221	0.0536726	0.985222	0.0714466	0.0670574	0.990915	0.532136
P.Parasutterella_excrementihominis	222	0.000455096	0.0622357	0.375928	0.00142692	0.294806	0.599523
S.Sutterella_wadsworthensis	223	0.000106797	0.04457	0.28147	0.000535767	0.294806	0.568608
A.Aquaspirillum_serpens	224	0.274599	0.622925	0.471712	0.301658	0.768444	0.656651
L.Laribacter_hongkongensis	225	0.000257023	0.990915	0.748465	0.000955112	0.990915	0.828142
N.Neisseria_unclassified	226	0.000542462	0.895443	0.077513	0.00164213	0.930404	0.532136
A.Azoarcus_unclassified	227	0.000139937	0.781381	0.900005	0.000626934	0.852158	0.915208
A.Azospira_oryzae	228	0.0521097	0.159422	0.453207	0.0659034	0.38084	0.656133
D.Dechloromonas_aromatica	229	0.00601883	0.669725	0.720516	0.0110467	0.781346	0.812267
M.Methyloversatilis_unclassified	230	0.000198428	0.903261	0.307919	0.000807121	0.934301	0.575675
T.Thauera_aminoaromatica	231	0.0135415	0.0226231	0.713803	0.0212291	0.294806	0.809654
T.Thauera_phenylacetica	232	0.058838	0.0364493	0.588218	0.0719928	0.294806	0.71973
T.Thauera_selenatis	233	0.548717	0.375277	0.430075	0.56953	0.548342	0.644042
T.Thauera_terpenica	234	0.000402986	0.0942309	0.23111	0.00130429	0.328212	0.546634
T.Thauera_unclassified	235	0.00583854	0.0112581	0.930263	0.0108711	0.294806	0.936222
B.Bilophila_unclassified	236	3.16e-06	0.632429	0.299768	0.000162099	0.770275	0.575374
B.Bilophila_wadsworthia	237	4.95e-05	0.860535	0.316066	0.000364718	0.912203	0.577439
D.Desulfovibrio_desulfuricans	238	0.039705	0.0656036	0.189982	0.0528815	0.294806	0.546634
S.Sorangium_cellulosum	239	0.0671535	0.649942	0.751106	0.0802112	0.773251	0.828142
A.Arcobacter_butzleri	240	0.065101	0.633984	0.086887	0.0782364	0.770275	0.532136
A.Arcobacter_unclassified	241	0.0082791	0.912063	0.0314501	0.0143219	0.940175	0.498236
S.Sulfurospirillum_unclassified	242	0.0407224	0.860683	0.455956	0.0539975	0.912203	0.656133
A.Aeromonas_aquariorum	243	0.773622	0.0280257	0.143197	0.78669	0.294806	0.537124
A.Aeromonas_caviae	244	0.0429076	0.165815	0.774631	0.0554299	0.38649	0.835712
A.Aeromonas_hydrophila	245	0.849628	0.340574	0.871319	0.858181	0.525433	0.8985
A.Aeromonas_media	246	0.116001	0.0145891	0.0412834	0.131759	0.294806	0.532136
A.Aeromonas_salmonicida	247	0.335235	0.330118	0.426614	0.359095	0.52421	0.64371
A.Aeromonas_unclassified	248	0.209464	0.103259	0.702505	0.232652	0.337665	0.800963
A.Aeromonas_veronii	249	0.268198	0.0518324	0.772216	0.296793	0.294806	0.835712
T.Tolumonas_auensis	250	0.0139903	0.232956	0.00922133	0.0215953	0.446756	0.308402
C.Citrobacter_freundii	251	0.00508203	0.737052	0.391263	0.0096207	0.821676	0.613871
C.Citrobacter_unclassified	252	0.004709	0.760752	0.740807	0.00902809	0.838777	0.823887
C.Cronobacter_sakazakii	253	0.0379036	0.41779	0.665874	0.0513918	0.590399	0.771837
E.Enterobacter_asburiae	254	0.00747877	0.0179393	0.871737	0.0130122	0.294806	0.8985
E.Enterobacter_cloacae	255	0.0066402	0.0744362	0.355801	0.011897	0.294806	0.599523
E.Enterobacter_hormaechei	256	0.000354974	0.919098	0.242543	0.00117095	0.940982	0.546634
E.Escherichia_coli	257	7.92e-05	0.336831	0.0241681	0.000468611	0.525433	0.450853
E.Escherichia_unclassified	258	0.86736	0.00885188	0.931632	0.873161	0.294806	0.936222
K.Klebsiella_oxytoca	259	0.379566	0.124549	0.572455	0.403708	0.346499	0.71234
K.Klebsiella_pneumoniae	260	0.0574887	0.178873	0.219392	0.070629	0.390151	0.546634
K.Klebsiella_unclassified	261	0.0468447	0.354578	0.686215	0.0600011	0.529901	0.785884
R.Rahnella_unclassified	262	0.0594981	0.2828	0.256172	0.0725058	0.492045	0.546634
R.Raoultella_ornithinolytica	263	0.625513	0.102661	0.509751	0.644792	0.337665	0.675926
Y.Yersinia_unclassified	264	0.0652403	0.0870212	0.540207	0.0782364	0.319431	0.688992
H.Haemophilus_parainfluenzae	265	0.0110503	0.0725868	0.556156	0.0182755	0.294806	0.697513
A.Acinetobacter_baumannii	266	0.0158355	0.48116	0.0936838	0.0237139	0.649458	0.532136
A.Acinetobacter_bereziniae	267	0.0707892	0.340131	0.189279	0.0842196	0.525433	0.546634
A.Acinetobacter_bouvetii	268	0.0186594	0.0264096	0.496797	0.0273974	0.294806	0.667571
A.Acinetobacter_brisouii	269	0.000146529	0.695759	0.0755964	0.000639207	0.79295	0.532136
A.Acinetobacter_gerneri	270	0.00142803	0.416517	0.128162	0.00338455	0.590399	0.532136
A.Acinetobacter_guillouiae	271	0.000764096	0.116971	0.373318	0.00209085	0.346499	0.599523
A.Acinetobacter_indicus	272	0.00119987	0.330897	0.135048	0.002949	0.52421	0.534861
A.Acinetobacter_johnsonii	273	2.37e-05	0.0738196	0.100154	0.00025013	0.294806	0.532136
A.Acinetobacter_junii	274	0.0143651	0.896403	0.0713619	0.0218642	0.930404	0.532136
A.Acinetobacter_lwoffii	275	0.041535	0.0481082	0.641608	0.0543567	0.294806	0.760331
A.Acinetobacter_parvus	276	0.0168037	0.447588	0.268434	0.0250392	0.623723	0.557233
A.Acinetobacter_pittii_calcoaceticus_nosocomialis	277	0.00485262	0.230265	0.124884	0.00924456	0.446756	0.532136
A.Acinetobacter_schindleri	278	0.0143824	0.0919897	0.191226	0.0218642	0.328212	0.546634
A.Acinetobacter_sp_NIPH_284	279	0.00529944	0.303258	0.237146	0.00996957	0.501541	0.546634
A.Acinetobacter_tandoii	280	0.0149514	0.849055	0.0669325	0.0225019	0.909486	0.532136
A.Acinetobacter_tjernbergiae	281	0.0539173	0.0730111	0.587506	0.0670624	0.294806	0.71973
A.Acinetobacter_towneri	282	0.00278668	0.288745	0.107817	0.00599136	0.492045	0.532136
A.Acinetobacter_unclassified	283	0.317774	0.0576868	0.878572	0.342831	0.294806	0.89949
A.Acinetobacter_ursingii	284	0.137692	0.546241	0.288615	0.154533	0.699654	0.571535
E.Enhydrobacter_aerosaccus	285	3.98e-05	0.300595	0.260162	0.000323855	0.501541	0.547613
P.Pseudomonas_extremaustralis	286	0.0144877	0.698112	0.0786585	0.0219136	0.79295	0.532136
P.Pseudomonas_fragi	287	0.00073399	0.0482572	0.222041	0.00202689	0.294806	0.546634
P.Pseudomonas_mandelii	288	0.0251941	0.232125	0.391572	0.0357709	0.446756	0.613871
P.Pseudomonas_mendocina	289	0.113477	0.134974	0.550412	0.129873	0.350233	0.693507
P.Pseudomonas_protegens	290	0.00195542	0.525823	0.288205	0.00449298	0.688143	0.571535
P.Pseudomonas_putida	291	0.000130033	0.693695	0.227572	0.000611564	0.79295	0.546634
P.Pseudomonas_unclassified	292	0.000428557	0.708043	0.00573081	0.00137229	0.799324	0.286787
T.Thiothrix_unclassified	293	0.0765085	0.0760018	0.584365	0.0899573	0.297098	0.71973
P.Pseudoxanthomonas_unclassified	294	0.355342	0.157877	0.61507	0.379283	0.380388	0.731763
S.Stenotrophomonas_maltophilia	295	0.975481	0.2402	0.10265	0.975481	0.446756	0.532136
S.Stenotrophomonas_unclassified	296	0.530004	0.220596	0.30754	0.553928	0.436839	0.575675
T.Turneriella_parva	297	0.00261651	0.988467	0.130076	0.00578153	0.990915	0.532136
A.Akkermansia_muciniphila	298	0.000141633	0.874971	0.283826	0.000626934	0.920923	0.569543
B.Bppunalikevirus_unclassified	299	0.138104	0.709035	0.599101	0.154533	0.799324	0.727134
Y.Yualikevirus_unclassified	300	0.07924	0.881708	0.412397	0.0924467	0.921508	0.636571
P.Dasheen_mosaic_virus	301	0.0628133	0.918936	0.65043	0.0762371	0.940982	0.764764
UP_DS	indexes	pValuesSource	pValuesLocation	pValuesTimepoint	pValuesSourceAdjusted	pValuesLocationAdjusted	pValuesTimepointAdjusted
A.actinobacterium_SCGC_AAA024_D14	1	0.22086	0.0297853	0.119418	0.561859	0.246961	0.258097
A.actinobacterium_SCGC_AAA027_L06	2	0.0276746	0.157442	0.936781	0.123613	0.485112	0.950975
A.actinobacterium_SCGC_AAA028_A23	3	0.0258007	0.140846	0.962377	0.123475	0.485112	0.962377
A.actinobacterium_SCGC_AAA044_N04	4	0.294953	0.0181296	0.00504659	0.617558	0.246961	0.0260093
A.actinobacterium_SCGC_AAA278_O22	5	0.409701	0.00081921	0.0110903	0.762499	0.054887	0.0464406
B.Brevibacterium_unclassified	6	0.0764204	0.159291	0.0695771	0.269483	0.485112	0.203257
L.Leifsonia_unclassified	7	0.668879	0.38537	0.587581	0.876338	0.674196	0.656132
L.Leucobacter_unclassified	8	0.504189	0.482948	0.0606834	0.807762	0.719057	0.193609
R.Rhodococcus_erythropolis	9	0.49684	0.897978	0.130506	0.807762	0.953005	0.272436
N.Nocardioides_unclassified	10	0.789437	0.0715117	0.357801	0.876338	0.36856	0.461013
B.Bacteroides_uniformis	11	0.228677	0.301981	0.231057	0.561859	0.674196	0.344019
B.Bacteroides_vulgatus	12	0.34166	0.386876	0.215734	0.673271	0.674196	0.338332
P.Prevotella_copri	13	0.610971	0.753699	0.0760726	0.835409	0.918142	0.203257
P.Prevotella_paludivivens	14	0.785829	0.4312	0.229317	0.876338	0.695497	0.344019
M.Myroides_unclassified	15	0.0170056	0.368856	1.49e-07	0.10358	0.674196	8.84e-06
R.Riemerella_unclassified	16	0.04524	0.923062	0.0265965	0.178126	0.953005	0.0957541
P.Pedobacter_unclassified	17	0.564786	0.053988	0.00163967	0.824729	0.328836	0.00915479
C.Cyanobium_unclassified	18	0.568083	0.391766	0.155038	0.824729	0.674196	0.299512
D.Deinococcus_unclassified	19	0.518414	0.55487	0.0788758	0.807762	0.773035	0.203257
E.Eubacterium_rectale	20	0.773102	0.899943	0.0897275	0.876338	0.953005	0.210934
P.Peptostreptococcaceae_noname_unclassified	21	0.000120138	0.0915455	0.0822858	0.00385631	0.408903	0.204191
S.Subdoligranulum_unclassified	22	0.134517	0.196448	0.0702327	0.450632	0.52648	0.203257
A.alpha_proteobacterium_SCGC_AAA024_N17	23	0.884214	0.512953	0.0103998	0.90244	0.747127	0.0464406
A.alpha_proteobacterium_SCGC_AAA027_C06	24	0.478641	0.392442	0.263085	0.807762	0.674196	0.375036
A.alpha_proteobacterium_SCGC_AAA027_J10	25	0.171619	0.354182	0.408936	0.547546	0.674196	0.507384
A.alpha_proteobacterium_SCGC_AAA027_L15	26	0.236848	0.315931	0.377984	0.561859	0.674196	0.477829
A.alpha_proteobacterium_SCGC_AAA280_P20	27	0.1918	0.597913	0.0266402	0.561859	0.785494	0.0957541
B.Brevundimonas_unclassified	28	0.686677	0.150407	0.165402	0.876338	0.485112	0.299512
C.Caulobacter_unclassified	29	0.888971	0.921605	0.206595	0.90244	0.953005	0.337607
C.Caulobacter_vibrioides	30	0.578541	0.425376	0.42886	0.824729	0.695497	0.513101
A.Afipia_unclassified	31	0.000172671	0.301106	0.102993	0.00385631	0.674196	0.230019
R.Rhodopseudomonas_palustris	32	0.607207	0.941957	0.65687	0.835409	0.953005	0.698576
R.Rhodopseudomonas_unclassified	33	0.824019	0.90457	0.656687	0.876338	0.953005	0.698576
P.Paracoccus_unclassified	34	0.341469	0.742132	0.00115214	0.673271	0.918142	0.00701755
H.Holospora_unclassified	35	9.63e-05	0.00530992	0.913061	0.00385631	0.177882	0.941155
S.Sandarakinorhabdus_unclassified	36	0.53099	0.666488	0.195155	0.808554	0.842541	0.326884
S.Sphingobium_unclassified	37	0.0208088	0.634901	5.9e-06	0.116183	0.818045	6.59e-05
S.Sphingopyxis_unclassified	38	0.630056	0.145473	0.628298	0.844275	0.485112	0.690097
B.Bordetella_unclassified	39	0.368544	0.537832	2.82e-05	0.705499	0.766697	0.00021027
B.Burkholderia_unclassified	40	0.0253149	0.781466	0.428067	0.123475	0.932715	0.513101
P.Polynucleobacter_necessarius	41	0.813159	0.352596	0.256442	0.876338	0.674196	0.373514
R.Ralstonia_unclassified	42	0.209078	0.274057	0.0912996	0.561859	0.674196	0.210934
T.Thiomonas_unclassified	43	0.727536	0.319675	0.0271541	0.876338	0.674196	0.0957541
A.Alicycliphilus_unclassified	44	0.0162159	0.247703	0.00697878	0.10358	0.638311	0.0333985
C.Comamonas_unclassified	45	0.51273	0.349202	0.188812	0.807762	0.674196	0.324369
L.Limnohabitans_unclassified	46	0.813845	0.45771	3.17e-07	0.876338	0.698186	8.84e-06
P.Polaromonas_unclassified	47	0.756506	0.0194444	4.89e-07	0.876338	0.246961	8.84e-06
V.Variovorax_unclassified	48	0.225145	0.149951	5.28e-07	0.561859	0.485112	8.84e-06
J.Janthinobacterium_unclassified	49	0.251579	0.027206	2.82e-06	0.561859	0.246961	3.78e-05
M.Massilia_unclassified	50	0.914937	0.042468	1.08e-05	0.914937	0.284536	9.06e-05
M.Methylotenera_unclassified	51	0.472699	0.953005	0.313956	0.807762	0.953005	0.429287
M.Methylotenera_versatilis	52	0.785856	0.796807	0.286504	0.876338	0.932715	0.399912
A.Azoarcus_unclassified	53	0.00101914	0.0202542	0.472534	0.0113804	0.246961	0.545859
D.Dechloromonas_aromatica	54	0.289104	0.141959	0.455615	0.617558	0.485112	0.535547
M.Methyloversatilis_unclassified	55	0.00623003	0.0235635	0.35228	0.0521765	0.246961	0.461013
T.Thauera_unclassified	56	0.0347977	0.0331739	0.340012	0.145716	0.246961	0.455616
A.Arcobacter_unclassified	57	0.244231	0.0805825	0.000645209	0.561859	0.385645	0.0043229
A.Aeromonas_unclassified	58	0.0478547	0.45851	0.157948	0.178126	0.698186	0.299512
E.Escherichia_unclassified	59	0.199795	0.907448	0.793666	0.561859	0.953005	0.830869
R.Rickettsiella_grylli	60	0.00905674	0.565354	1.04e-05	0.0674224	0.773035	9.06e-05
A.Acinetobacter_johnsonii	61	0.697691	0.435983	0.134185	0.876338	0.695497	0.272436
A.Acinetobacter_unclassified	62	0.00135829	0.590194	0.0371518	0.0130008	0.785494	0.124459
E.Enhydrobacter_aerosaccus	63	0.724095	0.184841	0.161704	0.876338	0.516014	0.299512
C.Cellvibrio_unclassified	64	0.856099	0.0707826	0.551271	0.896229	0.36856	0.62602
P.Pseudomonas_unclassified	65	0.505349	0.168112	0.179724	0.807762	0.489717	0.316882
B.Bppunalikevirus_unclassified	66	0.000553161	0.947968	0.0732443	0.00926545	0.953005	0.203257
Y.Yualikevirus_unclassified	67	0.000717512	0.807425	0.217138	0.00961466	0.932715	0.338332
UP_RURAL	indexes	pValuesUpRural	pValuesUpRuralAdjusted
A.actinobacterium_SCGC_AAA024_D14	1	0.253714	0.529491
A.actinobacterium_SCGC_AAA027_L06	2	0.143631	0.362856
A.actinobacterium_SCGC_AAA028_A23	3	0.0955719	0.286716
A.actinobacterium_SCGC_AAA044_N04	4	0.360218	0.617517
A.actinobacterium_SCGC_AAA278_O22	5	0.078368	0.254982
L.Leifsonia_unclassified	6	0.5103	0.790142
L.Leucobacter_unclassified	7	0.764354	0.873548
R.Rhodococcus_erythropolis	8	0.0163939	0.0991192
N.Nocardioides_unclassified	9	0.656427	0.816462
M.Myroides_unclassified	10	0.302966	0.543567
P.Pedobacter_unclassified	11	0.29559	0.543567
C.Cyanobium_unclassified	12	0.825158	0.876145
M.Microcoleus_unclassified	13	0.874024	0.89262
D.Deinococcus_unclassified	14	0.0345208	0.150636
A.alpha_proteobacterium_SCGC_AAA027_J10	15	0.626292	0.816462
A.alpha_proteobacterium_SCGC_AAA027_L15	16	0.64924	0.816462
A.alpha_proteobacterium_SCGC_AAA280_P20	17	0.666656	0.816462
A.Asticcacaulis_unclassified	18	0.00379787	0.0607659
B.Brevundimonas_unclassified	19	0.0555485	0.222194
C.Caulobacter_unclassified	20	0.0106665	0.0991192
C.Caulobacter_vibrioides	21	0.00235305	0.0564732
A.Afipia_unclassified	22	0.0309311	0.148469
R.Rhodopseudomonas_palustris	23	0.0161729	0.0991192
R.Rhodopseudomonas_unclassified	24	0.0165199	0.0991192
P.Paracoccus_unclassified	25	0.908805	0.908805
S.Sandarakinorhabdus_unclassified	26	0.807168	0.876145
S.Sphingobium_unclassified	27	0.000226613	0.0108774
S.Sphingopyxis_unclassified	28	0.0746515	0.254982
B.Bordetella_unclassified	29	0.489652	0.790142
P.Polynucleobacter_necessarius	30	0.141425	0.362856
R.Ralstonia_unclassified	31	0.130286	0.362856
T.Thiomonas_unclassified	32	0.654356	0.816462
C.Comamonas_unclassified	33	0.247517	0.529491
L.Limnohabitans_unclassified	34	0.49849	0.790142
P.Polaromonas_unclassified	35	0.0154719	0.0991192
V.Variovorax_unclassified	36	0.200162	0.457513
J.Janthinobacterium_unclassified	37	0.782605	0.873606
M.Massilia_unclassified	38	0.628541	0.816462
M.Methylotenera_unclassified	39	0.5363	0.804451
M.Methylotenera_versatilis	40	0.680385	0.816462
A.Arcobacter_unclassified	41	0.276564	0.543567
A.Aeromonas_unclassified	42	0.166718	0.400123
R.Rickettsiella_grylli	43	0.750456	0.873548
A.Acinetobacter_johnsonii	44	0.839639	0.876145
A.Acinetobacter_unclassified	45	0.0209041	0.111489
C.Cellvibrio_unclassified	46	0.305756	0.543567
P.Pseudomonas_unclassified	47	0.616289	0.816462
B.Bppunalikevirus_unclassified	48	0.0796819	0.254982
