# Supplementary material for: Microbial Community Composition and Antibiotic Resistance Genes Within a North Carolina Urban Water System
Source: Preprints.org preprint supplement (doi:10.20944/preprints201809.0255.v1), 2018-09-14
Supplement: Supplementary file 1 [file supplementary › mass_spec_stats_suppfile2.xlsx]

## Sheet: AllImpute0.txt
Comparison	Antibiotic Concentration (ng/ml)	Location	Sample	Timepoint
ATE_FCE	Trimethoprim	0.000766657	0.0462927	1.03058e-05
DS A_DS B	Trimethoprim	0.00224931	0.571148	0.0124667
UP_DOWN	Trimethoprim	0.00418159	0.0246088	0.0619902
ATE_FCE	Clindamycin	0.00482705	0.521405	0.000906726
ATE_FCE	Doxycycline	0.00720641	0.0089607	0.0780481
INF_PCE	Sulfamethoxazole	0.015221	0.288201	1.85842e-05
FCE_DS B	Trimethoprim	0.0223735	1.59022e-05	0.0793504
HOSP_RES	Ciprofloxacin	0.0229947	0.071366	0.00608237
FCE_DS A	Azithromycin	0.0282421	0.00846413	0.0379824
INF_PCE	Clindamycin	0.0328986	0.841963	0.00819335
UP_RURAL	Doxycycline	0.0399264
FCE_DS A	Doxycycline	0.0417307	0.00261398	0.0213366
FCE_DS B	Clindamycin	0.0436634	0.381235	0.375665
INF_FCE	Clindamycin	0.0450655	0.00233921	0.0984028
DS A_DS B	Levofloxacin	0.0474618	0.0520395	0.0114964
HOSP_RES	Sulfamethoxazole	0.0550766	0.0787946	0.00884013
PCE_ATE	Doxycycline	0.0747904	0.0721254	0.916968
INF_PCE	Ciprofloxacin	0.0860382	0.293768	0.0010081
INF_FCE	Sulfamethoxazole	0.0962137	0.00982873	0.000906002
ATE_FCE	Azithromycin	0.111586	0.124082	0.00830874
HOSP_RES	Cephalexin	0.127722	0.998152	0.931986
ATE_FCE	Cephalexin	0.137341	0.981839	0.320039
PCE_ATE	Clindamycin	0.155456	0.023712	0.106712
FCE_DS B	Sulfamethoxazole	0.165245	0.13219	0.000151111
FCE_DS B	Azithromycin	0.165818	0.00479922	0.0810049
INF_PCE	Levofloxacin	0.165867	0.408927	0.276523
INF_PCE	Doxycycline	0.188089	0.0881878	0.0120469
INF_FCE	Doxycycline	0.194077	0.127427	0.162188
DS A_DS B	Azithromycin	0.196424	0.089993	0.295766
FCE_DS B	Levofloxacin	0.201897	0.000625401	0.163427
FCE_DS B	Doxycycline	0.206682	0.000509562	0.126466
INF_FCE	Trimethoprim	0.212398	0.49189	0.436998
ATE_FCE	Sulfamethoxazole	0.23656	0.110535	0.0340221
FCE_DS A	Clindamycin	0.244061	0.0337479	0.13168
PCE_ATE	Sulfamethoxazole	0.262296	0.953105	0.0747379
INF_FCE	Azithromycin	0.276982	0.127208	0.688718
PCE_ATE	Levofloxacin	0.285806	0.412631	0.738267
ATE_FCE	Levofloxacin	0.286899	0.249994	0.207595
DS A_DS B	Clindamycin	0.298516	0.490715	0.624709
INF_FCE	Levofloxacin	0.307644	0.995105	0.0487519
DS A_DS B	Sulfamethoxazole	0.308243	0.95388	4.06418e-06
UP_DOWN	Levofloxacin	0.327476	0.00129684	0.0277548
FCE_DS A	Trimethoprim	0.339176	0.000294641	0.168254
INF_PCE	Trimethoprim	0.34844	0.620387	0.292533
HOSP_RES	Doxycycline	0.374083	0.608688	0.114994
PCE_ATE	Cephalexin	0.37542	0.726977	0.53179
HOSP_RES	Clindamycin	0.407265	0.166504	0.5845
UP_DOWN	Azithromycin	0.419596	0.1613	0.525152
FCE_DS A	Ciprofloxacin	0.426052	0.138274	0.21649
FCE_DS A	Sulfamethoxazole	0.457428	0.153692	0.000439778
DS A_DS B	Doxycycline	0.459438	0.0187709	0.0198944
FCE_DS A	Levofloxacin	0.520134	0.0063734	0.0822385
UP_RURAL	Clindamycin	0.600921
INF_PCE	Azithromycin	0.670752	0.199822	0.00631417
DS A_DS B	Cephalexin	0.691697	0.937817	0.664459
HOSP_RES	Trimethoprim	0.696605	0.881201	0.158949
UP_DOWN	Cephalexin	0.705788	0.337254	0.728968
PCE_ATE	Trimethoprim	0.75298	0.5661	0.29779
UP_DOWN	Doxycycline	0.757873	0.000821615	0.0384599
ATE_FCE	Ciprofloxacin	0.766231	0.0606747	0.0999152
DS A_DS B	Ciprofloxacin	0.788294	0.102848	0.303584
PCE_ATE	Ciprofloxacin	0.823228	0.926459	0.318863
FCE_DS A	Cephalexin	0.827666	0.00824003	0.278529
FCE_DS B	Ciprofloxacin	0.847045	0.0704429	0.452059
HOSP_RES	Levofloxacin	0.889874	0.633069	0.860672
UP_DOWN	Clindamycin	0.913911	0.575652	0.201354
HOSP_RES	Azithromycin	0.920919	0.665356	0.048545
UP_DOWN	Sulfamethoxazole	0.95346	0.000388589	1.11315e-06
PCE_ATE	Azithromycin	0.959465	0.875053	0.02253
FCE_DS B	Cephalexin	0.960868	0.0124141	0.41281
INF_FCE	Ciprofloxacin	0.96784	0.229922	0.0408482
