# Supplementary material for: Microbial Community Composition and Antibiotic Resistance Genes Within a North Carolina Urban Water System
Source: Preprints.org preprint supplement (doi:10.20944/preprints201809.0255.v1), 2018-09-14
Supplement: Supplementary file 1 [file supplementary › shortbred_stats_suppfile4.xlsx]

## Sheet: shortbred_stats_suppfile4
Test and Covariates Used	ShortBRED Gene and Organism	Location	Sample	Timepoint	adjusted_Location	adjusted_Sample	adjusted_Timepoint
Abundance_shortBRED_Location + Sample + TimepointATE_FCE	SHV_38	0.0466335	0.499767	0.0562837	0.212442	0.75682	0.329662
Abundance_shortBRED_Location + Sample + TimepointATE_FCE	gi.AAA23033_1.ARO_3000190.tetO__Campylobacter_jejuni_	0.323681	0.130311	0.0335862	0.439336	0.310213	0.275407
Abundance_shortBRED_Location + Sample + TimepointATE_FCE	gi.AAA26779_1.ARO_3001303.ErmO__Streptomyces_lividans_	0.301784	0.00253666	0.054803	0.439336	0.0520015	0.329662
Abundance_shortBRED_Location + Sample + TimepointATE_FCE	gi.AAA27471_1.ARO_3000205.tetX__Bacteroides_fragilis_	0.85762	0.85762	0.478899	0.87906	0.925327	0.560996
Abundance_shortBRED_Location + Sample + TimepointATE_FCE	gi.AAA71915_1.ARO_3000173.tetE__Escherichia_coli_	0.0743751	0.144984	0.547658	0.277216	0.310213	0.606864
Abundance_shortBRED_Location + Sample + TimepointATE_FCE	gi.AAA88552_1.ARO_3002541.AAC.3..VIIa__Streptomyces_rimosus_	0.852055	0.00123401	0.145962	0.87906	0.0505942	0.473737
Abundance_shortBRED_Location + Sample + TimepointATE_FCE	gi.AAC41449_1.ARO_3001398.OXA.3__Pseudomonas_aeruginosa_	0.0040527	0.0286449	0.348275	0.0420587	0.208774	0.533909
Abundance_shortBRED_Location + Sample + TimepointATE_FCE	gi.AAD01868_1.ARO_3002867.dfrF__Enterococcus_faecalis_	0.0852691	0.0447145	0.291882	0.279375	0.208774	0.505115
Abundance_shortBRED_Location + Sample + TimepointATE_FCE	gi.AAF04388_1.ARO_3001871.CTX.M.8__Citrobacter_amalonaticus_	0.496624	0.073516	0.0204286	0.636299	0.274014	0.240013
Abundance_shortBRED_Location + Sample + TimepointATE_FCE	gi.AAK55330_1.ARO_3001768.OXA.118__Burkholderia_cepacia_	0.270288	0.548884	0.395575	0.439336	0.767436	0.556055
Abundance_shortBRED_Location + Sample + TimepointATE_FCE	gi.AAL51021_2.ARO_3002598.ANT.3__..Ii.AAC.6_..IId_fusion_protein__Serratia_marcescens_	0.572762	0.74812	0.260562	0.711613	0.859924	0.505115
Abundance_shortBRED_Location + Sample + TimepointATE_FCE	gi.AAL59753_1.ARO_3000412.sul2__Vibrio_cholerae_	0.253731	0.0509205	0.415414	0.433456	0.208774	0.556055
Abundance_shortBRED_Location + Sample + TimepointATE_FCE	gi.AAO16462_1.ARO_3000167.tetC__uncultured_bacterium_	0.61852	0.949562	0.299985	0.745862	0.973301	0.505115
Abundance_shortBRED_Location + Sample + TimepointATE_FCE	gi.AAS13767_1.ARO_3003839.Mrx__Aeromonas_hydrophila_	0.780505	0.267072	0.140835	0.842124	0.476085	0.473737
Abundance_shortBRED_Location + Sample + TimepointATE_FCE	gi.AAW66497_1.ARO_3000566.tet39__Acinetobacter_sp__LUH5605_	0.70041	0.17869	0.0234159	0.82048	0.333012	0.240013
Abundance_shortBRED_Location + Sample + TimepointATE_FCE	gi.AAZ42322_1.ARO_3003836.qacH__Vibrio_cholerae_	0.00597471	0.0419788	0.453783	0.0436852	0.208774	0.560996
Abundance_shortBRED_Location + Sample + TimepointATE_FCE	gi.ABD58917_1.ARO_3002615.aadA15__Pseudomonas_aeruginosa_	0.06894	0.0129779	0.677977	0.277216	0.177365	0.731501
Abundance_shortBRED_Location + Sample + TimepointATE_FCE	gi.ABF47470_1.ARO_3002791.QnrS2__Salmonella_enterica_subsp__enterica_serovar_Anatum_	0.318993	0.901662	0.24336	0.439336	0.947901	0.505115
Abundance_shortBRED_Location + Sample + TimepointATE_FCE	gi.ABK33456_1.ARO_3002639.APH.3__..Ib__Pseudomonas_aeruginosa_	0.907744	0.599019	0.150209	0.907744	0.792251	0.473737
Abundance_shortBRED_Location + Sample + TimepointATE_FCE	gi.ACO72579_1.ARO_3001801.OXA.147__Pseudomonas_aeruginosa_	0.00306126	0.123003	0.22511	0.0420587	0.310213	0.505115
Abundance_shortBRED_Location + Sample + TimepointATE_FCE	gi.ACR57831_1.ARO_3003022.dfrB3__Klebsiella_oxytoca_	0.209089	0.561538	0.536576	0.413703	0.767436	0.606864
Abundance_shortBRED_Location + Sample + TimepointATE_FCE	gi.ACT97371_1.ARO_3003097.CfxA6__uncultured_organism_	0.10221	0.992969	0.0101884	0.279375	0.992969	0.208862
Abundance_shortBRED_Location + Sample + TimepointATE_FCE	gi.ADV91011_1.ARO_3000245.RbpA__Mycobacterium_smegmatis_str__MC2_155_	0.141839	0.151323	0.463638	0.325739	0.310213	0.560996
Abundance_shortBRED_Location + Sample + TimepointATE_FCE	gi.AEJ33969_1.ARO_3000410.sul1__Vibrio_fluvialis_	0.00187926	0.498821	0.196319	0.0420587	0.75682	0.505115
Abundance_shortBRED_Location + Sample + TimepointATE_FCE	gi.AEL31272_1.ARO_3002756.QnrB41__Citrobacter_freundii_	0.0296645	0.4396	0.307997	0.152031	0.720944	0.505115
Abundance_shortBRED_Location + Sample + TimepointATE_FCE	gi.AEQ38567_1.ARO_3002660.APH.6..Id__Escherichia_coli_	0.332181	0.516853	0.261341	0.439336	0.75682	0.505115
Abundance_shortBRED_Location + Sample + TimepointATE_FCE	gi.AEV91550_1.ARO_3001710.OXA.211__Acinetobacter_johnsonii_	0.101679	0.143248	0.00535796	0.279375	0.310213	0.208862
Abundance_shortBRED_Location + Sample + TimepointATE_FCE	gi.AHA41505_1.ARO_3002930.vanRO__Rhodococcus_equi_	0.212449	0.0340378	0.086856	0.413703	0.208774	0.398759
Abundance_shortBRED_Location + Sample + TimepointATE_FCE	gi.BAE77933_1.ARO_3000518.CRP__Escherichia_coli_str__K.12_substr__W3110_	0.143007	0.73553	0.0875325	0.325739	0.859924	0.398759
Abundance_shortBRED_Location + Sample + TimepointATE_FCE	gi.BAE78084_1.ARO_3003548.mdtN__Escherichia_coli_str__K.12_substr__W3110_	0.771488	0.0187565	0.115251	0.842124	0.192254	0.47253
Abundance_shortBRED_Location + Sample + TimepointATE_FCE	gi.BAL43359.ARO_3003742.mphG__Photobacterium_damselae_subsp__damselae_	0.300406	0.0466099	0.392198	0.439336	0.208774	0.556055
Abundance_shortBRED_Location + Sample + TimepointATE_FCE	gi.BAL43360.ARO_3003745.mefC__Photobacterium_damselae_subsp__damselae_	0.237392	0.115762	0.780354	0.423177	0.310213	0.820373
Abundance_shortBRED_Location + Sample + TimepointATE_FCE	gi.CAA28209_1.ARO_3000230.ANT.2__..Ia__uncultured_bacterium_	0.0955445	0.700722	0.351598	0.279375	0.859924	0.533909
Abundance_shortBRED_Location + Sample + TimepointATE_FCE	gi.CAA57832_1.ARO_3002670.cat__Morganella_morganii_	0.00410329	0.138726	0.213802	0.0420587	0.310213	0.505115
Abundance_shortBRED_Location + Sample + TimepointATE_FCE	gi.CAG27791_1.ARO_3000316.mphA__uncultured_bacterium_	0.327839	0.14296	0.476379	0.439336	0.310213	0.560996
Abundance_shortBRED_Location + Sample + TimepointATE_FCE	gi.CCP46065_1.ARO_3000816.mtrA__Mycobacterium_tuberculosis_H37Rv_	0.221987	0.755056	0.22139	0.413703	0.859924	0.505115
Abundance_shortBRED_Location + Sample + TimepointATE_FCE	gi.YP_001707639_1.ARO_3000814.mexT__Acinetobacter_baumannii_SDF_	0.0225386	0.175705	0.198626	0.132012	0.333012	0.505115
Abundance_shortBRED_Location + Sample + TimepointATE_FCE	gi.YP_006142099_1.ARO_3002601.aadA__Escherichia_coli_UMNK88_	0.767953	0.721271	0.947397	0.842124	0.859924	0.971082
Abundance_shortBRED_Location + Sample + TimepointATE_FCE	gi.YP_008997285_1.ARO_3000615.mefA__Exiguobacterium_sp__S3.2_	0.208069	0.386992	0.420432	0.413703	0.661112	0.556055
Abundance_shortBRED_Location + Sample + TimepointATE_FCE	gi.YP_009081591_1.ARO_3002613.aadA13__Pseudomonas_aeruginosa_	0.111549	0.798253	0.987285	0.285845	0.88455	0.987285
Abundance_shortBRED_Location + Sample + TimepointATE_FCE	gi.YP_724476_1.ARO_3003109.msrE__Escherichia_coli_	0.00639296	0.098778	0.29844	0.0436852	0.310213	0.505115
Test and Covariates Used	ShortBRED Gene and Organism	Location	Sample	Timepoint	adjusted_Location	adjusted_Sample	adjusted_Timepoint
Abundance_shortBRED_Location + Sample + TimepointDS A_DS B	SHV_38	0.0621699	0.573791	0.0869101	0.198944	0.979886	0.283375
Abundance_shortBRED_Location + Sample + TimepointDS A_DS B	gi.AAA26779_1.ARO_3001303.ErmO__Streptomyces_lividans_	0.709233	0.249673	0.733612	0.867774	0.979886	0.838414
Abundance_shortBRED_Location + Sample + TimepointDS A_DS B	gi.AAA88552_1.ARO_3002541.AAC.3..VIIa__Streptomyces_rimosus_	0.640215	0.893433	0.0656318	0.85362	0.979886	0.283375
Abundance_shortBRED_Location + Sample + TimepointDS A_DS B	gi.AAB46602_1.ARO_3002701.cmr__Corynebacterium_glutamicum_	0.0273669	0.971361	0.292085	0.128956	0.979886	0.424851
Abundance_shortBRED_Location + Sample + TimepointDS A_DS B	gi.AAC41449_1.ARO_3001398.OXA.3__Pseudomonas_aeruginosa_	0.00501564	0.687267	0.106959	0.0729553	0.979886	0.283375
Abundance_shortBRED_Location + Sample + TimepointDS A_DS B	gi.AAF04388_1.ARO_3001871.CTX.M.8__Citrobacter_amalonaticus_	0.00911941	0.632669	0.110749	0.0729553	0.979886	0.283375
Abundance_shortBRED_Location + Sample + TimepointDS A_DS B	gi.AAO16462_1.ARO_3000167.tetC__uncultured_bacterium_	0.989179	0.193411	0.910313	0.989179	0.979886	0.910313
Abundance_shortBRED_Location + Sample + TimepointDS A_DS B	gi.AAZ42322_1.ARO_3003836.qacH__Vibrio_cholerae_	0.0322389	0.979886	0.0659425	0.128956	0.979886	0.283375
Abundance_shortBRED_Location + Sample + TimepointDS A_DS B	gi.ABK33456_1.ARO_3002639.APH.3__..Ib__Pseudomonas_aeruginosa_	0.177014	0.759339	0.128358	0.354027	0.979886	0.283375
Abundance_shortBRED_Location + Sample + TimepointDS A_DS B	gi.ACR57831_1.ARO_3003022.dfrB3__Klebsiella_oxytoca_	0.084083	0.942292	0.850469	0.224221	0.979886	0.907167
Abundance_shortBRED_Location + Sample + TimepointDS A_DS B	gi.AEJ33969_1.ARO_3000410.sul1__Vibrio_fluvialis_	0.88625	0.528632	0.358402	0.945333	0.979886	0.477869
Abundance_shortBRED_Location + Sample + TimepointDS A_DS B	gi.AEQ38567_1.ARO_3002660.APH.6..Id__Escherichia_coli_	0.117075	0.833103	0.167744	0.267599	0.979886	0.298211
Abundance_shortBRED_Location + Sample + TimepointDS A_DS B	gi.AHA41505_1.ARO_3002930.vanRO__Rhodococcus_equi_	0.230952	0.700484	0.234459	0.402872	0.979886	0.375135
Abundance_shortBRED_Location + Sample + TimepointDS A_DS B	gi.CAG27791_1.ARO_3000316.mphA__uncultured_bacterium_	0.53608	0.543443	0.141688	0.779753	0.979886	0.283375
Abundance_shortBRED_Location + Sample + TimepointDS A_DS B	gi.CCP46065_1.ARO_3000816.mtrA__Mycobacterium_tuberculosis_H37Rv_	0.759302	0.565861	0.588482	0.867774	0.979886	0.724286
Abundance_shortBRED_Location + Sample + TimepointDS A_DS B	gi.YP_724476_1.ARO_3003109.msrE__Escherichia_coli_	0.251795	0.33135	0.135486	0.402872	0.979886	0.283375
Test and Covariates Used	ShortBRED Gene and Organism	Location	Sample	Timepoint	adjusted_Location	adjusted_Sample	adjusted_Timepoint
Abundance_shortBRED_Location + Sample + TimepointFCE_DOWN	SHV_38	0.0524998	0.296492	0.0555393	0.134166	0.324729	0.425801
Abundance_shortBRED_Location + Sample + TimepointFCE_DOWN	gi.AAA26779_1.ARO_3001303.ErmO__Streptomyces_lividans_	0.276529	0.0816764	0.685645	0.318009	0.110503	0.717318
Abundance_shortBRED_Location + Sample + TimepointFCE_DOWN	gi.AAA88552_1.ARO_3002541.AAC.3..VIIa__Streptomyces_rimosus_	0.238166	0.433946	0.179301	0.317096	0.453671	0.603702
Abundance_shortBRED_Location + Sample + TimepointFCE_DOWN	gi.AAC41449_1.ARO_3001398.OXA.3__Pseudomonas_aeruginosa_	0.00261581	0.00082302	0.514404	0.0300818	0.00264674	0.717318
Abundance_shortBRED_Location + Sample + TimepointFCE_DOWN	gi.AAD01868_1.ARO_3002867.dfrF__Enterococcus_faecalis_	0.0755753	0.00455209	0.281744	0.173823	0.009518	0.676373
Abundance_shortBRED_Location + Sample + TimepointFCE_DOWN	gi.AAF04388_1.ARO_3001871.CTX.M.8__Citrobacter_amalonaticus_	0.229101	0.642635	0.529415	0.317096	0.642635	0.717318
Abundance_shortBRED_Location + Sample + TimepointFCE_DOWN	gi.AAL51021_2.ARO_3002598.ANT.3__..Ii.AAC.6_..IId_fusion_protein__Serratia_marcescens_	0.265164	1.14e-05	0.866147	0.318009	0.000131303	0.866147
Abundance_shortBRED_Location + Sample + TimepointFCE_DOWN	gi.AAL59753_1.ARO_3000412.sul2__Vibrio_cholerae_	0.0374347	4.31e-06	0.0352638	0.125196	9.91e-05	0.425801
Abundance_shortBRED_Location + Sample + TimepointFCE_DOWN	gi.AAO16462_1.ARO_3000167.tetC__uncultured_bacterium_	0.177279	0.0944657	0.438016	0.313647	0.120706	0.717318
Abundance_shortBRED_Location + Sample + TimepointFCE_DOWN	gi.AAW66497_1.ARO_3000566.tet39__Acinetobacter_sp__LUH5605_	0.439224	5.55e-05	0.041303	0.459189	0.000355709	0.425801
Abundance_shortBRED_Location + Sample + TimepointFCE_DOWN	gi.AAZ42322_1.ARO_3003836.qacH__Vibrio_cholerae_	0.00204957	0.000960106	0.442279	0.0300818	0.00264674	0.717318
Abundance_shortBRED_Location + Sample + TimepointFCE_DOWN	gi.ABK33456_1.ARO_3002639.APH.3__..Ib__Pseudomonas_aeruginosa_	0.33999	0.0145329	0.184077	0.37237	0.0238755	0.603702
Abundance_shortBRED_Location + Sample + TimepointFCE_DOWN	gi.ACO72579_1.ARO_3001801.OXA.147__Pseudomonas_aeruginosa_	0.0410142	0.00397486	0.640255	0.125196	0.00914217	0.717318
Abundance_shortBRED_Location + Sample + TimepointFCE_DOWN	gi.ACR57831_1.ARO_3003022.dfrB3__Klebsiella_oxytoca_	0.0105898	0.0401329	0.462821	0.0811883	0.0576911	0.717318
Abundance_shortBRED_Location + Sample + TimepointFCE_DOWN	gi.AEJ33969_1.ARO_3000410.sul1__Vibrio_fluvialis_	0.0435465	0.00103568	0.62012	0.125196	0.00264674	0.717318
Abundance_shortBRED_Location + Sample + TimepointFCE_DOWN	gi.AEQ38567_1.ARO_3002660.APH.6..Id__Escherichia_coli_	0.232231	0.0126368	0.110757	0.317096	0.0223574	0.603702
Abundance_shortBRED_Location + Sample + TimepointFCE_DOWN	gi.AHA41505_1.ARO_3002930.vanRO__Rhodococcus_equi_	0.172486	0.171425	0.209983	0.313647	0.207515	0.603702
Abundance_shortBRED_Location + Sample + TimepointFCE_DOWN	gi.BAL43359.ARO_3003742.mphG__Photobacterium_damselae_subsp__damselae_	0.124051	6.19e-05	0.294075	0.25938	0.000355709	0.676373
Abundance_shortBRED_Location + Sample + TimepointFCE_DOWN	gi.BAL43360.ARO_3003745.mefC__Photobacterium_damselae_subsp__damselae_	0.246739	0.000317958	0.571187	0.317096	0.00146261	0.717318
Abundance_shortBRED_Location + Sample + TimepointFCE_DOWN	gi.CAA57832_1.ARO_3002670.cat__Morganella_morganii_	0.0419261	0.00660683	0.636981	0.125196	0.0126631	0.717318
Abundance_shortBRED_Location + Sample + TimepointFCE_DOWN	gi.CAG27791_1.ARO_3000316.mphA__uncultured_bacterium_	0.705661	0.181097	0.149278	0.705661	0.208262	0.603702
Abundance_shortBRED_Location + Sample + TimepointFCE_DOWN	gi.CCP46065_1.ARO_3000816.mtrA__Mycobacterium_tuberculosis_H37Rv_	0.248162	0.0216355	0.416834	0.317096	0.0331745	0.717318
Abundance_shortBRED_Location + Sample + TimepointFCE_DOWN	gi.YP_724476_1.ARO_3003109.msrE__Escherichia_coli_	0.0387533	0.00103189	0.686131	0.125196	0.00264674	0.717318
Test and Covariates Used	ShortBRED Gene and Organism	Location	Sample	Timepoint	adjusted_Location	adjusted_Sample	adjusted_Timepoint
Abundance_shortBRED_Location + Sample + TimepointFCE_DS A	SHV_38	0.192936	0.313484	0.316571	0.32558	0.35267	0.74135
Abundance_shortBRED_Location + Sample + TimepointFCE_DS A	gi.AAA23033_1.ARO_3000190.tetO__Campylobacter_jejuni_	0.123714	0.0636246	0.0144254	0.256944	0.122705	0.389485
Abundance_shortBRED_Location + Sample + TimepointFCE_DS A	gi.AAA26779_1.ARO_3001303.ErmO__Streptomyces_lividans_	0.382059	0.143799	0.802565	0.448504	0.184884	0.833432
Abundance_shortBRED_Location + Sample + TimepointFCE_DS A	gi.AAA88552_1.ARO_3002541.AAC.3..VIIa__Streptomyces_rimosus_	0.10099	0.473512	0.66689	0.256944	0.499292	0.74135
Abundance_shortBRED_Location + Sample + TimepointFCE_DS A	gi.AAC41449_1.ARO_3001398.OXA.3__Pseudomonas_aeruginosa_	0.00738814	0.015363	0.635923	0.0997398	0.0567435	0.74135
Abundance_shortBRED_Location + Sample + TimepointFCE_DS A	gi.AAD01868_1.ARO_3002867.dfrF__Enterococcus_faecalis_	0.0805118	0.0464411	0.282718	0.256944	0.112142	0.74135
Abundance_shortBRED_Location + Sample + TimepointFCE_DS A	gi.AAF04388_1.ARO_3001871.CTX.M.8__Citrobacter_amalonaticus_	0.759214	0.605895	0.641566	0.759214	0.605895	0.74135
Abundance_shortBRED_Location + Sample + TimepointFCE_DS A	gi.AAL51021_2.ARO_3002598.ANT.3__..Ii.AAC.6_..IId_fusion_protein__Serratia_marcescens_	0.292669	0.00397428	0.876602	0.448504	0.0274323	0.876602
Abundance_shortBRED_Location + Sample + TimepointFCE_DS A	gi.AAL59753_1.ARO_3000412.sul2__Vibrio_cholerae_	0.118893	0.000641213	0.196405	0.256944	0.0173128	0.74135
Abundance_shortBRED_Location + Sample + TimepointFCE_DS A	gi.AAO16462_1.ARO_3000167.tetC__uncultured_bacterium_	0.0961169	0.0754876	0.686435	0.256944	0.135878	0.74135
Abundance_shortBRED_Location + Sample + TimepointFCE_DS A	gi.AAW66497_1.ARO_3000566.tet39__Acinetobacter_sp__LUH5605_	0.404065	0.00270096	0.0649345	0.454573	0.0274323	0.74135
Abundance_shortBRED_Location + Sample + TimepointFCE_DS A	gi.AAZ42322_1.ARO_3003836.qacH__Vibrio_cholerae_	0.00617247	0.0142248	0.63713	0.0997398	0.0567435	0.74135
Abundance_shortBRED_Location + Sample + TimepointFCE_DS A	gi.ABK33456_1.ARO_3002639.APH.3__..Ib__Pseudomonas_aeruginosa_	0.445205	0.0899704	0.351721	0.480822	0.14051	0.74135
Abundance_shortBRED_Location + Sample + TimepointFCE_DS A	gi.ACO72579_1.ARO_3001801.OXA.147__Pseudomonas_aeruginosa_	0.0505139	0.0402139	0.639204	0.208263	0.108578	0.74135
Abundance_shortBRED_Location + Sample + TimepointFCE_DS A	gi.ACR57831_1.ARO_3003022.dfrB3__Klebsiella_oxytoca_	0.0191427	0.132247	0.670279	0.172284	0.184884	0.74135
Abundance_shortBRED_Location + Sample + TimepointFCE_DS A	gi.ADV91011_1.ARO_3000245.RbpA__Mycobacterium_smegmatis_str__MC2_155_	0.360334	0.225959	0.664037	0.448504	0.277313	0.74135
Abundance_shortBRED_Location + Sample + TimepointFCE_DS A	gi.AEJ33969_1.ARO_3000410.sul1__Vibrio_fluvialis_	0.0442916	0.0189145	0.644034	0.208263	0.0567435	0.74135
Abundance_shortBRED_Location + Sample + TimepointFCE_DS A	gi.AEQ38567_1.ARO_3002660.APH.6..Id__Escherichia_coli_	0.373537	0.0936731	0.257665	0.448504	0.14051	0.74135
Abundance_shortBRED_Location + Sample + TimepointFCE_DS A	gi.AHA41505_1.ARO_3002930.vanRO__Rhodococcus_equi_	0.191247	0.243357	0.533039	0.32558	0.28568	0.74135
Abundance_shortBRED_Location + Sample + TimepointFCE_DS A	gi.BAL43359.ARO_3003742.mphG__Photobacterium_damselae_subsp__damselae_	0.134147	0.00406404	0.309511	0.258712	0.0274323	0.74135
Abundance_shortBRED_Location + Sample + TimepointFCE_DS A	gi.BAL43360.ARO_3003745.mefC__Photobacterium_damselae_subsp__damselae_	0.308452	0.0115152	0.634477	0.448504	0.0567435	0.74135
Abundance_shortBRED_Location + Sample + TimepointFCE_DS A	gi.CAA57832_1.ARO_3002670.cat__Morganella_morganii_	0.0539942	0.0539942	0.642984	0.208263	0.112142	0.74135
Abundance_shortBRED_Location + Sample + TimepointFCE_DS A	gi.CAG27791_1.ARO_3000316.mphA__uncultured_bacterium_	0.511262	0.4808	0.337374	0.530926	0.499292	0.74135
Abundance_shortBRED_Location + Sample + TimepointFCE_DS A	gi.CCP46065_1.ARO_3000816.mtrA__Mycobacterium_tuberculosis_H37Rv_	0.355513	0.140339	0.61747	0.448504	0.184884	0.74135
Abundance_shortBRED_Location + Sample + TimepointFCE_DS A	gi.YP_001707639_1.ARO_3000814.mexT__Acinetobacter_baumannii_SDF_	0.107083	0.085673	0.520553	0.256944	0.14051	0.74135
Abundance_shortBRED_Location + Sample + TimepointFCE_DS A	gi.YP_009081591_1.ARO_3002613.aadA13__Pseudomonas_aeruginosa_	0.341493	0.0535028	0.47128	0.448504	0.112142	0.74135
Abundance_shortBRED_Location + Sample + TimepointFCE_DS A	gi.YP_724476_1.ARO_3003109.msrE__Escherichia_coli_	0.0446972	0.0177893	0.665394	0.208263	0.0567435	0.74135
Test and Covariates Used	ShortBRED Gene and Organism	Location	Sample	Timepoint	adjusted_Location	adjusted_Sample	adjusted_Timepoint
Abundance_shortBRED_Location + Sample + TimepointFCE_DS B	SHV_38	0.185987	0.418504	0.223438	0.344332	0.453379	0.727479
Abundance_shortBRED_Location + Sample + TimepointFCE_DS B	gi.AAA23033_1.ARO_3000190.tetO__Campylobacter_jejuni_	0.45178	0.0256636	0.153623	0.559347	0.0667253	0.727479
Abundance_shortBRED_Location + Sample + TimepointFCE_DS B	gi.AAA26779_1.ARO_3001303.ErmO__Streptomyces_lividans_	0.116545	0.275102	0.403788	0.278725	0.325121	0.727479
Abundance_shortBRED_Location + Sample + TimepointFCE_DS B	gi.AAA88552_1.ARO_3002541.AAC.3..VIIa__Streptomyces_rimosus_	0.22514	0.609607	0.419699	0.344332	0.633991	0.727479
Abundance_shortBRED_Location + Sample + TimepointFCE_DS B	gi.AAC41449_1.ARO_3001398.OXA.3__Pseudomonas_aeruginosa_	0.00920135	0.0147799	0.592302	0.119618	0.0571951	0.755422
Abundance_shortBRED_Location + Sample + TimepointFCE_DS B	gi.AAD01868_1.ARO_3002867.dfrF__Enterococcus_faecalis_	0.117922	0.0388188	0.345089	0.278725	0.0871302	0.727479
Abundance_shortBRED_Location + Sample + TimepointFCE_DS B	gi.AAF04388_1.ARO_3001871.CTX.M.8__Citrobacter_amalonaticus_	0.742346	0.843931	0.807912	0.742346	0.843931	0.807912
Abundance_shortBRED_Location + Sample + TimepointFCE_DS B	gi.AAL51021_2.ARO_3002598.ANT.3__..Ii.AAC.6_..IId_fusion_protein__Serratia_marcescens_	0.223851	0.000239119	0.677892	0.344332	0.0062171	0.759211
Abundance_shortBRED_Location + Sample + TimepointFCE_DS B	gi.AAL59753_1.ARO_3000412.sul2__Vibrio_cholerae_	0.0718836	0.00109315	0.0986105	0.233622	0.0142109	0.727479
Abundance_shortBRED_Location + Sample + TimepointFCE_DS B	gi.AAO16462_1.ARO_3000167.tetC__uncultured_bacterium_	0.213217	0.409656	0.317338	0.344332	0.453379	0.727479
Abundance_shortBRED_Location + Sample + TimepointFCE_DS B	gi.AAW66497_1.ARO_3000566.tet39__Acinetobacter_sp__LUH5605_	0.353793	0.00358649	0.0755283	0.45993	0.0264162	0.727479
Abundance_shortBRED_Location + Sample + TimepointFCE_DS B	gi.AAZ42322_1.ARO_3003836.qacH__Vibrio_cholerae_	0.00885081	0.0172334	0.592815	0.119618	0.0571951	0.755422
Abundance_shortBRED_Location + Sample + TimepointFCE_DS B	gi.ABK33456_1.ARO_3002639.APH.3__..Ib__Pseudomonas_aeruginosa_	0.490262	0.106948	0.366914	0.579401	0.154481	0.727479
Abundance_shortBRED_Location + Sample + TimepointFCE_DS B	gi.ACO72579_1.ARO_3001801.OXA.147__Pseudomonas_aeruginosa_	0.0505139	0.0402139	0.639204	0.231164	0.0871302	0.755422
Abundance_shortBRED_Location + Sample + TimepointFCE_DS B	gi.ACR57831_1.ARO_3003022.dfrB3__Klebsiella_oxytoca_	0.0613287	0.13257	0.346947	0.231164	0.177825	0.727479
Abundance_shortBRED_Location + Sample + TimepointFCE_DS B	gi.AEJ33969_1.ARO_3000410.sul1__Vibrio_fluvialis_	0.0622365	0.019377	0.615936	0.231164	0.0571951	0.755422
Abundance_shortBRED_Location + Sample + TimepointFCE_DS B	gi.AEQ38567_1.ARO_3002660.APH.6..Id__Escherichia_coli_	0.306878	0.0781881	0.19482	0.419939	0.131029	0.727479
Abundance_shortBRED_Location + Sample + TimepointFCE_DS B	gi.AHA41505_1.ARO_3002930.vanRO__Rhodococcus_equi_	0.646603	0.136789	0.267081	0.672467	0.177825	0.727479
Abundance_shortBRED_Location + Sample + TimepointFCE_DS B	gi.BAL43359.ARO_3003742.mphG__Photobacterium_damselae_subsp__damselae_	0.134147	0.00406404	0.309511	0.290652	0.0264162	0.727479
Abundance_shortBRED_Location + Sample + TimepointFCE_DS B	gi.BAL43360.ARO_3003745.mefC__Photobacterium_damselae_subsp__damselae_	0.240757	0.0135973	0.603295	0.34776	0.0571951	0.755422
Abundance_shortBRED_Location + Sample + TimepointFCE_DS B	gi.CAA57832_1.ARO_3002670.cat__Morganella_morganii_	0.0502406	0.0532409	0.638319	0.231164	0.106482	0.755422
Abundance_shortBRED_Location + Sample + TimepointFCE_DS B	gi.CAG27791_1.ARO_3000316.mphA__uncultured_bacterium_	0.515288	0.0779124	0.17158	0.582499	0.131029	0.727479
Abundance_shortBRED_Location + Sample + TimepointFCE_DS B	gi.CCP46065_1.ARO_3000816.mtrA__Mycobacterium_tuberculosis_H37Rv_	0.210747	0.0822563	0.301931	0.344332	0.131029	0.727479
Abundance_shortBRED_Location + Sample + TimepointFCE_DS B	gi.YP_001707639_1.ARO_3000814.mexT__Acinetobacter_baumannii_SDF_	0.107083	0.085673	0.520553	0.278725	0.131029	0.755422
Abundance_shortBRED_Location + Sample + TimepointFCE_DS B	gi.YP_009081591_1.ARO_3002613.aadA13__Pseudomonas_aeruginosa_	0.612453	0.156568	0.785175	0.663491	0.193846	0.807912
Abundance_shortBRED_Location + Sample + TimepointFCE_DS B	gi.YP_724476_1.ARO_3003109.msrE__Escherichia_coli_	0.0463778	0.0197983	0.70081	0.231164	0.0571951	0.759211
Test and Covariates Used	ShortBRED Gene and Organism	Location	Sample	Timepoint	adjusted_Location	adjusted_Sample	adjusted_Timepoint
Abundance_shortBRED_Location + Sample + TimepointHOSP_RES	SHV_38	0.756213	0.690515	0.342983	0.919033	0.951095	0.524767
Abundance_shortBRED_Location + Sample + TimepointHOSP_RES	gi.AAA22419_1.ARO_3000522.ErmG__Lysinibacillus_sphaericus_	0.877711	0.521271	0.00099495	0.96735	0.951095	0.026532
Abundance_shortBRED_Location + Sample + TimepointHOSP_RES	gi.AAA23033_1.ARO_3000190.tetO__Campylobacter_jejuni_	0.654869	0.19533	0.138385	0.893334	0.762263	0.357122
Abundance_shortBRED_Location + Sample + TimepointHOSP_RES	gi.AAA25293_1.ARO_3000192.tetS__Listeria_monocytogenes_	0.159941	0.0713546	0.159957	0.522258	0.634263	0.365616
Abundance_shortBRED_Location + Sample + TimepointHOSP_RES	gi.AAA26779_1.ARO_3001303.ErmO__Streptomyces_lividans_	0.31522	0.70168	0.0729039	0.625769	0.951095	0.27127
Abundance_shortBRED_Location + Sample + TimepointHOSP_RES	gi.AAA27431_1.ARO_3000498.ErmF__Bacteroides_fragilis_	0.0232173	0.20583	1.32e-06	0.336104	0.784114	0.00010549
Abundance_shortBRED_Location + Sample + TimepointHOSP_RES	gi.AAA27471_1.ARO_3000205.tetX__Bacteroides_fragilis_	0.689767	0.52584	0.00143346	0.897258	0.951095	0.0299914
Abundance_shortBRED_Location + Sample + TimepointHOSP_RES	gi.AAA71915_1.ARO_3000173.tetE__Escherichia_coli_	0.0696754	0.635784	0.0101774	0.4161	0.951095	0.12526
Abundance_shortBRED_Location + Sample + TimepointHOSP_RES	gi.AAA83417_1.ARO_3001407.OXA.12__Aeromonas_sobria_	0.201646	0.152141	0.135642	0.567669	0.735191	0.35609
Abundance_shortBRED_Location + Sample + TimepointHOSP_RES	gi.AAA88552_1.ARO_3002541.AAC.3..VIIa__Streptomyces_rimosus_	0.453279	0.905068	0.426215	0.763417	0.951095	0.595275
Abundance_shortBRED_Location + Sample + TimepointHOSP_RES	gi.AAA98406_1.ARO_3001404.OXA.9__Klebsiella_pneumoniae_	0.0621637	0.243455	0.0791684	0.4161	0.794956	0.287885
Abundance_shortBRED_Location + Sample + TimepointHOSP_RES	gi.AAB46602_1.ARO_3002701.cmr__Corynebacterium_glutamicum_	0.325987	0.34702	0.904672	0.636073	0.828669	0.939919
Abundance_shortBRED_Location + Sample + TimepointHOSP_RES	gi.AAB53445_1.ARO_3002897.sat.4__Campylobacter_coli_	0.053204	0.860432	0.108579	0.4161	0.951095	0.324
Abundance_shortBRED_Location + Sample + TimepointHOSP_RES	gi.AAC09015_1.ARO_3002481.AER.1__Aeromonas_hydrophila_	0.531293	0.135578	0.0691546	0.821097	0.728664	0.26822
Abundance_shortBRED_Location + Sample + TimepointHOSP_RES	gi.AAC36915_1.ARO_3000593.ErmQ__Clostridium_perfringens_	0.33866	0.104245	0.240714	0.645066	0.725185	0.461889
Abundance_shortBRED_Location + Sample + TimepointHOSP_RES	gi.AAC41449_1.ARO_3001398.OXA.3__Pseudomonas_aeruginosa_	0.37749	0.842429	0.323081	0.704074	0.951095	0.516418
Abundance_shortBRED_Location + Sample + TimepointHOSP_RES	gi.AAC45086_2.ARO_3001821.ACT.1__Klebsiella_pneumoniae_	0.00825035	0.193174	0.209075	0.307679	0.762263	0.423443
Abundance_shortBRED_Location + Sample + TimepointHOSP_RES	gi.AAC45607_1.ARO_3000375.ErmB__Lactobacillus_fermentum_	0.0783311	0.00563489	0.00665802	0.4161	0.217442	0.0887736
Abundance_shortBRED_Location + Sample + TimepointHOSP_RES	gi.AAC74149_2.ARO_3001216.mdtH__Escherichia_coli_str__K.12_substr__MG1655_	0.214625	0.438271	0.0212757	0.567669	0.899017	0.167021
Abundance_shortBRED_Location + Sample + TimepointHOSP_RES	gi.AAC75135_2.ARO_3000792.mdtA__Escherichia_coli_str__K.12_substr__MG1655_	0.295173	0.88529	0.31479	0.605484	0.951095	0.508752
Abundance_shortBRED_Location + Sample + TimepointHOSP_RES	gi.AAC75136_1.ARO_3000793.mdtB__Escherichia_coli_str__K.12_substr__MG1655_	0.658216	0.600099	0.0931331	0.893334	0.951095	0.304108
Abundance_shortBRED_Location + Sample + TimepointHOSP_RES	gi.AAC75137_1.ARO_3000794.mdtC__Escherichia_coli_str__K.12_substr__MG1655_	0.267229	0.808867	0.535582	0.577947	0.951095	0.663955
Abundance_shortBRED_Location + Sample + TimepointHOSP_RES	gi.AAC75138_1.ARO_3001330.mdtD__Escherichia_coli_str__K.12_substr__MG1655_	0.599908	0.791555	0.30496	0.857012	0.951095	0.507861
Abundance_shortBRED_Location + Sample + TimepointHOSP_RES	gi.AAC75314_1.ARO_3003578.PmrF__Escherichia_coli_str__K.12_substr__MG1655_	0.894799	0.414886	0.768836	0.96735	0.899017	0.831175
Abundance_shortBRED_Location + Sample + TimepointHOSP_RES	gi.AAC75315_1.ARO_3002985.arnA__Escherichia_coli_str__K.12_substr__MG1655_	0.124078	0.750873	0.307891	0.484205	0.951095	0.507861
Abundance_shortBRED_Location + Sample + TimepointHOSP_RES	gi.AAC75429_1.ARO_3000833.evgS__Escherichia_coli_str__K.12_substr__MG1655_	0.909556	0.459317	0.268352	0.970193	0.918634	0.48243
Abundance_shortBRED_Location + Sample + TimepointHOSP_RES	gi.AAC75733_1.ARO_3000074.emrB__Escherichia_coli_str__K.12_substr__MG1655_	0.153659	0.888752	0.915115	0.522258	0.951095	0.944635
Abundance_shortBRED_Location + Sample + TimepointHOSP_RES	gi.AAC76093_1.ARO_3002986.bacA__Escherichia_coli_str__K.12_substr__MG1655_	0.825557	0.660747	0.121802	0.96735	0.951095	0.346992
Abundance_shortBRED_Location + Sample + TimepointHOSP_RES	gi.AAC76296_1.ARO_3000656.acrS__Escherichia_coli_str__K.12_substr__MG1655_	0.397168	0.351397	0.00331647	0.70519	0.828669	0.0589595
Abundance_shortBRED_Location + Sample + TimepointHOSP_RES	gi.AAC76297_1.ARO_3000499.acrE__Escherichia_coli_str__K.12_substr__MG1655_	0.763946	0.718752	0.84292	0.919033	0.951095	0.89316
Abundance_shortBRED_Location + Sample + TimepointHOSP_RES	gi.AAC76298_1.ARO_3000502.acrF__Escherichia_coli_str__K.12_substr__MG1655_	0.531924	0.318004	0.273093	0.821097	0.828669	0.484636
Abundance_shortBRED_Location + Sample + TimepointHOSP_RES	gi.AAC76539_1.ARO_3000796.mdtF__Escherichia_coli_str__K.12_substr__MG1655_	0.708882	0.848883	0.765843	0.899452	0.951095	0.831175
Abundance_shortBRED_Location + Sample + TimepointHOSP_RES	gi.AAC76733_1.ARO_3001215.mdtL__Escherichia_coli_str__K.12_substr__MG1655_	0.100909	0.12612	0.0893215	0.436363	0.728664	0.297973
Abundance_shortBRED_Location + Sample + TimepointHOSP_RES	gi.AAC77293_1.ARO_3001214.mdtM__Escherichia_coli_str__K.12_substr__MG1655_	0.574005	0.0865478	0.0161393	0.850378	0.640401	0.155007
Abundance_shortBRED_Location + Sample + TimepointHOSP_RES	gi.AAC78336_1.ARO_3002826.EreA2__Providencia_stuartii_	0.118236	0.279166	0.17454	0.472943	0.828669	0.372353
Abundance_shortBRED_Location + Sample + TimepointHOSP_RES	gi.AAD01868_1.ARO_3002867.dfrF__Enterococcus_faecalis_	0.0426762	0.958918	0.275637	0.4161	0.966125	0.484636
Abundance_shortBRED_Location + Sample + TimepointHOSP_RES	gi.AAF04388_1.ARO_3001871.CTX.M.8__Citrobacter_amalonaticus_	0.262747	0.783806	0.422699	0.577947	0.951095	0.595275
Abundance_shortBRED_Location + Sample + TimepointHOSP_RES	gi.AAF17880_1.ARO_3002605.aadA5__Escherichia_coli_	0.891528	0.160823	0.220934	0.96735	0.735191	0.438502
Abundance_shortBRED_Location + Sample + TimepointHOSP_RES	gi.AAF27726_1.ARO_3002694.cmlA4__Klebsiella_pneumoniae_	0.218874	0.8295	0.239884	0.567669	0.951095	0.461889
Abundance_shortBRED_Location + Sample + TimepointHOSP_RES	gi.AAG03357_1.ARO_3000596.ErmX__Corynebacterium_striatum_	0.0397462	0.778819	0.0207066	0.4161	0.951095	0.167021
Abundance_shortBRED_Location + Sample + TimepointHOSP_RES	gi.AAG16656_1.ARO_3002705.floR__Escherichia_coli_	0.960834	0.134353	0.615831	0.9918	0.728664	0.710796
Abundance_shortBRED_Location + Sample + TimepointHOSP_RES	gi.AAK55330_1.ARO_3001768.OXA.118__Burkholderia_cepacia_	0.61647	0.817627	0.10935	0.872878	0.951095	0.324
Abundance_shortBRED_Location + Sample + TimepointHOSP_RES	gi.AAK63040_1.ARO_3002635.APH.2__..IIa__Escherichia_coli_	0.894586	0.0407708	0.576662	0.96735	0.501795	0.680065
Abundance_shortBRED_Location + Sample + TimepointHOSP_RES	gi.AAL51021_2.ARO_3002598.ANT.3__..Ii.AAC.6_..IId_fusion_protein__Serratia_marcescens_	0.216019	0.297934	0.255657	0.567669	0.828669	0.470174
Abundance_shortBRED_Location + Sample + TimepointHOSP_RES	gi.AAL59753_1.ARO_3000412.sul2__Vibrio_cholerae_	0.0326078	0.839854	0.0454784	0.401327	0.951095	0.234727
Abundance_shortBRED_Location + Sample + TimepointHOSP_RES	gi.AAM09853_1.ARO_3002957.vanYD__Enterococcus_faecium_	0.658834	0.157125	0.171904	0.893334	0.735191	0.371684
Abundance_shortBRED_Location + Sample + TimepointHOSP_RES	gi.AAO16462_1.ARO_3000167.tetC__uncultured_bacterium_	0.518055	0.492333	0.565492	0.820682	0.942825	0.675214
Abundance_shortBRED_Location + Sample + TimepointHOSP_RES	gi.AAS13767_1.ARO_3003839.Mrx__Aeromonas_hydrophila_	0.553637	0.573177	0.682289	0.843637	0.951095	0.752879
Abundance_shortBRED_Location + Sample + TimepointHOSP_RES	gi.AAS48620_1.ARO_3002372.VEB.3__Enterobacter_cloacae_	0.0252078	0.0845539	0.153988	0.336104	0.640401	0.361915
Abundance_shortBRED_Location + Sample + TimepointHOSP_RES	gi.AAU10334_1.ARO_3002628.aad.6.__Streptococcus_oralis_	0.844498	0.427089	0.131031	0.96735	0.899017	0.355338
Abundance_shortBRED_Location + Sample + TimepointHOSP_RES	gi.AAW66497_1.ARO_3000566.tet39__Acinetobacter_sp__LUH5605_	0.976181	0.137663	0.00149957	0.992956	0.728664	0.0299914
Abundance_shortBRED_Location + Sample + TimepointHOSP_RES	gi.AAY32951_1.ARO_3002837.lnuC__Streptococcus_agalactiae_	0.670632	0.955308	0.403896	0.893914	0.966125	0.582193
Abundance_shortBRED_Location + Sample + TimepointHOSP_RES	gi.AAY43207_1.ARO_3002338.GES.9__Pseudomonas_aeruginosa_	0.331822	0.726679	0.505837	0.639657	0.951095	0.658
Abundance_shortBRED_Location + Sample + TimepointHOSP_RES	gi.AAZ42322_1.ARO_3003836.qacH__Vibrio_cholerae_	0.000302109	0.89717	0.167633	0.0483375	0.951095	0.371684
Abundance_shortBRED_Location + Sample + TimepointHOSP_RES	gi.ABD58917_1.ARO_3002615.aadA15__Pseudomonas_aeruginosa_	0.176091	0.887959	0.0608982	0.552441	0.951095	0.268053
Abundance_shortBRED_Location + Sample + TimepointHOSP_RES	gi.ABF47470_1.ARO_3002791.QnrS2__Salmonella_enterica_subsp__enterica_serovar_Anatum_	0.418333	0.921214	0.103169	0.727535	0.957105	0.322844
Abundance_shortBRED_Location + Sample + TimepointHOSP_RES	gi.ABF47919_1.ARO_3001631.OXA.96__Acinetobacter_baumannii_	0.206148	0.116904	0.677316	0.567669	0.728664	0.752879
Abundance_shortBRED_Location + Sample + TimepointHOSP_RES	gi.ABF66011_1.ARO_3002881.lmrC__Lactococcus_lactis_subsp__lactis_	0.567451	0.143286	0.697406	0.848525	0.728664	0.76428
Abundance_shortBRED_Location + Sample + TimepointHOSP_RES	gi.ABF66027_1.ARO_3002882.lmrD__Lactococcus_lactis_subsp__lactis_	0.30212	0.815402	0.537269	0.611889	0.951095	0.663955
Abundance_shortBRED_Location + Sample + TimepointHOSP_RES	gi.ABG77966_1.ARO_3000216.acrB__Enterobacter_cloacae_	0.598484	0.766305	0.536772	0.857012	0.951095	0.663955
Abundance_shortBRED_Location + Sample + TimepointHOSP_RES	gi.ABK33456_1.ARO_3002639.APH.3__..Ib__Pseudomonas_aeruginosa_	0.533713	0.810578	0.0694125	0.821097	0.951095	0.26822
Abundance_shortBRED_Location + Sample + TimepointHOSP_RES	gi.ACA23185_1.ARO_3000194.tetW__Bifidobacterium_longum_	0.249782	0.896132	0.00529157	0.577947	0.951095	0.0846651
Abundance_shortBRED_Location + Sample + TimepointHOSP_RES	gi.ACC85616_1.ARO_3002804.FosA2__Enterobacter_cloacae_	0.761365	0.0499457	0.0834126	0.919033	0.570808	0.292981
Abundance_shortBRED_Location + Sample + TimepointHOSP_RES	gi.ACF17980_1.ARO_3002616.aadA16__Escherichia_coli_	0.232726	0.942449	0.54065	0.577947	0.966125	0.663955
Abundance_shortBRED_Location + Sample + TimepointHOSP_RES	gi.ACG70184_1.ARO_3002788.QnrD1__Salmonella_enterica_subsp__enterica_serovar_Bovismorbificans_	0.77992	0.0037546	0.156076	0.931248	0.200246	0.361915
Abundance_shortBRED_Location + Sample + TimepointHOSP_RES	gi.ACI32877_1.ARO_3002859.dfrA14__Escherichia_coli_	0.0165963	0.0302278	0.561482	0.331927	0.501795	0.675214
Abundance_shortBRED_Location + Sample + TimepointHOSP_RES	gi.ACJ61335_1.ARO_3002249.CARB.10__Acinetobacter_baumannii_	0.904872	0.0573412	0.0164695	0.970193	0.580997	0.155007
Abundance_shortBRED_Location + Sample + TimepointHOSP_RES	gi.ACJ63262_1.ARO_3003107.mefB__Escherichia_coli_	0.0919127	0.000527456	0.0572566	0.424281	0.0432391	0.268053
Abundance_shortBRED_Location + Sample + TimepointHOSP_RES	gi.ACN32294_1.ARO_3000237.tolC__Escherichia_coli_	0.0820745	0.0332562	0.354772	0.4161	0.501795	0.531953
Abundance_shortBRED_Location + Sample + TimepointHOSP_RES	gi.ACO72579_1.ARO_3001801.OXA.147__Pseudomonas_aeruginosa_	0.855324	0.28847	0.0219215	0.96735	0.828669	0.167021
Abundance_shortBRED_Location + Sample + TimepointHOSP_RES	gi.ACR57831_1.ARO_3003022.dfrB3__Klebsiella_oxytoca_	0.665725	0.39143	0.819122	0.893914	0.879002	0.87373
Abundance_shortBRED_Location + Sample + TimepointHOSP_RES	gi.ACS44784_1.ARO_3002185.MOX.6__Aeromonas_caviae_	0.980544	0.314342	0.135759	0.992956	0.828669	0.35609
Abundance_shortBRED_Location + Sample + TimepointHOSP_RES	gi.ACT97371_1.ARO_3003097.CfxA6__uncultured_organism_	0.00961497	0.341256	6.34e-07	0.307679	0.828669	0.00010146
Abundance_shortBRED_Location + Sample + TimepointHOSP_RES	gi.ACT97415_1.ARO_3002999.CblA.1__mixed_culture_bacterium_AX_gF3SD01_15_	0.0570092	0.229887	0.000692444	0.4161	0.794956	0.026532
Abundance_shortBRED_Location + Sample + TimepointHOSP_RES	gi.AEJ33969_1.ARO_3000410.sul1__Vibrio_fluvialis_	0.498551	0.904384	0.344378	0.806405	0.951095	0.524767
Abundance_shortBRED_Location + Sample + TimepointHOSP_RES	gi.AEL31272_1.ARO_3002756.QnrB41__Citrobacter_freundii_	0.0148192	0.0580997	0.627034	0.331927	0.580997	0.71661
Abundance_shortBRED_Location + Sample + TimepointHOSP_RES	gi.AEQ38567_1.ARO_3002660.APH.6..Id__Escherichia_coli_	0.875322	0.634621	0.020923	0.96735	0.951095	0.167021
Abundance_shortBRED_Location + Sample + TimepointHOSP_RES	gi.AET35493_1.ARO_3001777.OXA.347__uncultured_bacterium_	0.643006	0.564937	0.0127691	0.893334	0.951095	0.145933
Abundance_shortBRED_Location + Sample + TimepointHOSP_RES	gi.AEV91550_1.ARO_3001710.OXA.211__Acinetobacter_johnsonii_	0.39979	0.172351	0.103791	0.70519	0.7453	0.322844
Abundance_shortBRED_Location + Sample + TimepointHOSP_RES	gi.AFK13827_1.ARO_3000825.robA__Enterobacter_cloacae_	0.112027	0.828678	0.195432	0.471692	0.951095	0.406092
Abundance_shortBRED_Location + Sample + TimepointHOSP_RES	gi.AFK13828_1.ARO_3000823.ramA__Enterobacter_cloacae_	0.0476347	0.672743	0.434076	0.4161	0.951095	0.598726
Abundance_shortBRED_Location + Sample + TimepointHOSP_RES	gi.AFK31666_1.ARO_3000567.tet40__Streptococcus_suis_	0.681266	0.230905	0.0292311	0.893914	0.794956	0.167035
Abundance_shortBRED_Location + Sample + TimepointHOSP_RES	gi.AFU35065_1.ARO_3003206.lsaE__Staphylococcus_aureus_	0.441211	0.7173	0.617504	0.759072	0.951095	0.710796
Abundance_shortBRED_Location + Sample + TimepointHOSP_RES	gi.AFU35066_1.ARO_3000275.linB__Staphylococcus_aureus_	0.951197	0.224137	0.980201	0.9918	0.794956	0.980201
Abundance_shortBRED_Location + Sample + TimepointHOSP_RES	gi.AGJ01153_1.ARO_3002326.KPC.16__Klebsiella_pneumoniae_	0.0491618	0.0325316	0.384911	0.4161	0.501795	0.565007
Abundance_shortBRED_Location + Sample + TimepointHOSP_RES	gi.AGV10818_1.ARO_3002669.APH.2__..Ig__Campylobacter_coli_CVM_N29710_	0.264766	0.284256	0.447576	0.577947	0.828669	0.601351
Abundance_shortBRED_Location + Sample + TimepointHOSP_RES	gi.AGV10830_1.ARO_3002647.APH.3_..IIIa__Campylobacter_coli_CVM_N29710_	0.245053	0.452176	0.169188	0.577947	0.915799	0.371684
Abundance_shortBRED_Location + Sample + TimepointHOSP_RES	gi.AGV28567_1.ARO_3000559.adeN__Acinetobacter_baumannii_	0.638022	0.888487	0.027758	0.893334	0.951095	0.167035
Abundance_shortBRED_Location + Sample + TimepointHOSP_RES	gi.AHA11125_1.ARO_3001549.OXA.362__Acinetobacter_lwoffii_	0.37844	0.287772	0.44541	0.704074	0.828669	0.601351
Abundance_shortBRED_Location + Sample + TimepointHOSP_RES	gi.AHA41505_1.ARO_3002930.vanRO__Rhodococcus_equi_	0.0897635	0.180591	0.494198	0.424281	0.760384	0.648129
Abundance_shortBRED_Location + Sample + TimepointHOSP_RES	gi.AHW42429_1.ARO_3002858.dfrA12__Klebsiella_pneumoniae_subsp__pneumoniae_	0.0701245	0.82059	0.891396	0.4161	0.951095	0.932178
Abundance_shortBRED_Location + Sample + TimepointHOSP_RES	gi.AIJ27543_1.ARO_3002629.ANT.6..Ib__Campylobacter_jejuni_	0.262274	0.786442	0.578055	0.577947	0.951095	0.680065
Abundance_shortBRED_Location + Sample + TimepointHOSP_RES	gi.AJA36815_1.ARO_3003193.QnrVC7__Vibrio_cholerae_	0.941997	0.352801	0.682297	0.991575	0.828669	0.752879
Abundance_shortBRED_Location + Sample + TimepointHOSP_RES	gi.AJE60855_1.ARO_3003209.FosA5__Escherichia_coli_	0.508213	0.239454	0.0704078	0.81314	0.794956	0.26822
Abundance_shortBRED_Location + Sample + TimepointHOSP_RES	gi.ANK04027_1.ARO_3003838.gadW__Escherichia_coli_O25b_H4_	0.138008	0.469069	0.0574993	0.501848	0.926557	0.268053
Abundance_shortBRED_Location + Sample + TimepointHOSP_RES	gi.BAA11236_1.ARO_3000206.emrK__Escherichia_coli_	0.59986	0.589109	0.149487	0.857012	0.951095	0.359845
Abundance_shortBRED_Location + Sample + TimepointHOSP_RES	gi.BAA11237_1.ARO_3000254.emrY__Escherichia_coli_	0.719562	0.563634	0.0159178	0.899452	0.951095	0.155007
Abundance_shortBRED_Location + Sample + TimepointHOSP_RES	gi.BAB72158_1.ARO_3002020.CMY.9__Escherichia_coli_	0.159397	0.664972	0.0259112	0.522258	0.951095	0.167035
Abundance_shortBRED_Location + Sample + TimepointHOSP_RES	gi.BAC67143_1.ARO_3000166.tetB__Gram.negative_bacterium_TC71_	0.316796	0.291464	0.246895	0.625769	0.828669	0.464743
Abundance_shortBRED_Location + Sample + TimepointHOSP_RES	gi.BAD00739_1.ARO_3002607.aadA7__Vibrio_fluvialis_	0.262581	0.0123779	0.179008	0.577947	0.330078	0.376859
Abundance_shortBRED_Location + Sample + TimepointHOSP_RES	gi.BAD95494_1.ARO_3002895.sat.1__Escherichia_coli_	0.08322	0.500876	0.642441	0.4161	0.942825	0.723877
Abundance_shortBRED_Location + Sample + TimepointHOSP_RES	gi.BAE77781_1.ARO_3000795.mdtE__Escherichia_coli_str__K.12_substr__W3110_	0.204587	0.352172	0.312488	0.567669	0.828669	0.508752
Abundance_shortBRED_Location + Sample + TimepointHOSP_RES	gi.BAE77933_1.ARO_3000518.CRP__Escherichia_coli_str__K.12_substr__W3110_	0.0119008	0.972329	0.0262861	0.317355	0.972329	0.167035
Abundance_shortBRED_Location + Sample + TimepointHOSP_RES	gi.BAE78082_1.ARO_3003550.mdtP__Escherichia_coli_str__K.12_substr__W3110_	0.0251651	0.907466	0.297353	0.336104	0.951095	0.500805
Abundance_shortBRED_Location + Sample + TimepointHOSP_RES	gi.BAE78083_1.ARO_3003549.mdtO__Escherichia_coli_str__K.12_substr__W3110_	0.150348	0.339275	0.860901	0.522258	0.828669	0.906211
Abundance_shortBRED_Location + Sample + TimepointHOSP_RES	gi.BAE78084_1.ARO_3003548.mdtN__Escherichia_coli_str__K.12_substr__W3110_	0.401077	0.680462	0.0413132	0.70519	0.951095	0.220337
Abundance_shortBRED_Location + Sample + TimepointHOSP_RES	gi.BAE78116_1.ARO_3003576.PmrC__Escherichia_coli_str__K.12_substr__W3110_	0.38871	0.654123	0.293431	0.70519	0.951095	0.499458
Abundance_shortBRED_Location + Sample + TimepointHOSP_RES	gi.BAL43359.ARO_3003742.mphG__Photobacterium_damselae_subsp__damselae_	0.000813885	0.240315	0.000955104	0.0608657	0.794956	0.026532
Abundance_shortBRED_Location + Sample + TimepointHOSP_RES	gi.BAL43360.ARO_3003745.mefC__Photobacterium_damselae_subsp__damselae_	0.00114123	0.775127	0.000543727	0.0608657	0.951095	0.026532
Abundance_shortBRED_Location + Sample + TimepointHOSP_RES	gi.CAA28209_1.ARO_3000230.ANT.2__..Ia__uncultured_bacterium_	0.888115	0.937113	0.250261	0.96735	0.966125	0.465602
Abundance_shortBRED_Location + Sample + TimepointHOSP_RES	gi.CAA33795_1.ARO_3003563.NPS_beta.lactamase__Rhodobacter_capsulatus_	0.0473552	0.60228	0.549382	0.4161	0.951095	0.665918
Abundance_shortBRED_Location + Sample + TimepointHOSP_RES	gi.CAA40146_1.ARO_3002997.LCR.1__Pseudomonas_aeruginosa_	0.991203	0.609505	0.376223	0.997437	0.951095	0.557368
Abundance_shortBRED_Location + Sample + TimepointHOSP_RES	gi.CAA52904_1.ARO_3002688.catS__Streptococcus_pyogenes_	0.0587405	0.841436	0.543613	0.4161	0.951095	0.663955
Abundance_shortBRED_Location + Sample + TimepointHOSP_RES	gi.CAA56561_1.ARO_3003553.CepS_beta.lactamase__Aeromonas_sobria_	0.998457	0.304545	0.516877	0.998457	0.828669	0.663955
Abundance_shortBRED_Location + Sample + TimepointHOSP_RES	gi.CAA57832_1.ARO_3002670.cat__Morganella_morganii_	0.863176	0.144112	0.068499	0.96735	0.728664	0.26822
Abundance_shortBRED_Location + Sample + TimepointHOSP_RES	gi.CAA71441_1.ARO_3003095.imiS__Aeromonas_veronii_	0.967005	0.633348	0.124578	0.9918	0.951095	0.346992
Abundance_shortBRED_Location + Sample + TimepointHOSP_RES	gi.CAA79727_1.ARO_3000191.tetQ__Bacteroides_fragilis_	0.218236	0.13657	0.0287571	0.567669	0.728664	0.167035
Abundance_shortBRED_Location + Sample + TimepointHOSP_RES	gi.CAB89086_1.ARO_3002158.FOX.4__Escherichia_coli_	0.219972	0.301589	0.0593882	0.567669	0.828669	0.268053
Abundance_shortBRED_Location + Sample + TimepointHOSP_RES	gi.CAC41371_1.ARO_3000196.tet32__Clostridiaceae_bacterium_K10_	0.760118	0.690471	0.280731	0.919033	0.951095	0.488228
Abundance_shortBRED_Location + Sample + TimepointHOSP_RES	gi.CAC81324_1.ARO_3003015.dfrA19__Salmonella_enterica_subsp__enterica_serovar_Typhimurium_	0.117805	0.749848	0.81284	0.472943	0.951095	0.872848
Abundance_shortBRED_Location + Sample + TimepointHOSP_RES	gi.CAC85660_1.ARO_3000960.TEM.93__Escherichia_coli_	0.0768024	0.00679506	0.325989	0.4161	0.217442	0.516418
Abundance_shortBRED_Location + Sample + TimepointHOSP_RES	gi.CAD55718_1.ARO_3000197.tet36__Bacteroides_coprosuis_DSM_18011_	0.470052	0.725616	0.411392	0.780263	0.951095	0.587703
Abundance_shortBRED_Location + Sample + TimepointHOSP_RES	gi.CAE48335_2.ARO_3002599.AAC.6_..30_AAC.6_..Ib__fusion_protein__Pseudomonas_aeruginosa_	0.274525	0.145733	0.0310968	0.577947	0.728664	0.171568
Abundance_shortBRED_Location + Sample + TimepointHOSP_RES	gi.CAE51638_1.ARO_3002641.APH.3_..Ia__Serratia_marcescens_	0.591022	0.427882	0.933335	0.857012	0.899017	0.949372
Abundance_shortBRED_Location + Sample + TimepointHOSP_RES	gi.CAE51745_1.ARO_3000168.tetD__Serratia_marcescens_	0.136856	0.0633225	0.113772	0.501848	0.595977	0.330973
Abundance_shortBRED_Location + Sample + TimepointHOSP_RES	gi.CAG27791_1.ARO_3000316.mphA__uncultured_bacterium_	0.291655	0.530319	0.0253764	0.605484	0.951095	0.167035
Abundance_shortBRED_Location + Sample + TimepointHOSP_RES	gi.CAG34233_2.ARO_3003019.dfrA23__Salmonella_enterica_subsp__enterica_serovar_Typhimurium_	0.127528	0.024646	0.339797	0.48582	0.501795	0.524767
Abundance_shortBRED_Location + Sample + TimepointHOSP_RES	gi.CAJ19599_1.ARO_3002420.OKP.A.3__Klebsiella_pneumoniae_	0.0646158	0.886839	0.143114	0.4161	0.951095	0.359845
Abundance_shortBRED_Location + Sample + TimepointHOSP_RES	gi.CAP69660_1.ARO_3001811.OXA.129__Salmonella_enterica_subsp__enterica_serovar_Bredeney_	0.0928116	0.568672	0.454336	0.424281	0.951095	0.601351
Abundance_shortBRED_Location + Sample + TimepointHOSP_RES	gi.CAQ03505_1.ARO_3001338.SHV.100__Klebsiella_pneumoniae_	0.699206	0.706374	0.263913	0.899452	0.951095	0.479843
Abundance_shortBRED_Location + Sample + TimepointHOSP_RES	gi.EFF04178_1.ARO_3000309.emrD__Escherichia_coli_B185_	0.194808	0.500517	0.0248155	0.567669	0.942825	0.167035
Abundance_shortBRED_Location + Sample + TimepointHOSP_RES	gi.NP_309766_1.ARO_3000676.H.NS__Escherichia_coli_O157_H7_str__Sakai_	0.74578	0.625793	0.0659559	0.919033	0.951095	0.26822
Abundance_shortBRED_Location + Sample + TimepointHOSP_RES	gi.NP_311275_1.ARO_3000832.evgA__Escherichia_coli_O157_H7_str__Sakai_	0.714697	0.48647	0.145967	0.899452	0.942825	0.359845
Abundance_shortBRED_Location + Sample + TimepointHOSP_RES	gi.NP_312864_1.ARO_3000830.cpxA__Escherichia_coli_O157_H7_str__Sakai_	0.148882	0.893754	0.338438	0.522258	0.951095	0.524767
Abundance_shortBRED_Location + Sample + TimepointHOSP_RES	gi.NP_312865_1.ARO_3000831.cpxR__Escherichia_coli_O157_H7_str__Sakai_	0.865291	0.774408	0.978475	0.96735	0.951095	0.980201
Abundance_shortBRED_Location + Sample + TimepointHOSP_RES	gi.NP_414618_4.ARO_3003843.leuO__Escherichia_coli_str__K.12_substr__MG1655_	0.165047	0.0880551	0.454772	0.528149	0.640401	0.601351
Abundance_shortBRED_Location + Sample + TimepointHOSP_RES	gi.NP_414996_1.ARO_3000207.acrA__Escherichia_coli_str__K.12_substr__MG1655_	0.205286	0.428176	0.125785	0.567669	0.899017	0.346992
Abundance_shortBRED_Location + Sample + TimepointHOSP_RES	gi.NP_415222_1.ARO_3003841.kdpE__Escherichia_coli_str__K.12_substr__MG1655_	0.0762637	0.960087	0.221991	0.4161	0.966125	0.438502
Abundance_shortBRED_Location + Sample + TimepointHOSP_RES	gi.NP_415632_1.ARO_3003844.mfd__Escherichia_coli_str__K.12_substr__MG1655_	0.272995	0.226503	0.0842321	0.577947	0.794956	0.292981
Abundance_shortBRED_Location + Sample + TimepointHOSP_RES	gi.NP_415791_1.ARO_3003840.aminocoumarin_resistant_cysB__Escherichia_coli_str__K.12_substr__MG1655_	0.705251	0.897788	0.285869	0.899452	0.951095	0.491817
Abundance_shortBRED_Location + Sample + TimepointHOSP_RES	gi.NP_416340_1.ARO_3003820.mgrB__Escherichia_coli_str__K.12_substr__MG1655_	0.795102	0.389008	0.242492	0.942343	0.879002	0.461889
Abundance_shortBRED_Location + Sample + TimepointHOSP_RES	gi.NP_417169_1.ARO_3000516.emrR__Escherichia_coli_str__K.12_substr__MG1655_	0.0548417	0.167182	0.528675	0.4161	0.743029	0.663955
Abundance_shortBRED_Location + Sample + TimepointHOSP_RES	gi.NP_417177_1.ARO_3003830.aminocoumarin_resistant_alaS__Escherichia_coli_str__K.12_substr__MG1655_	0.965736	0.745636	0.930736	0.9918	0.951095	0.949372
Abundance_shortBRED_Location + Sample + TimepointHOSP_RES	gi.NP_417969_1.ARO_3003834.gadE__Escherichia_coli_str__K.12_substr__MG1655_	0.192836	0.357363	0.427854	0.567669	0.828669	0.595275
Abundance_shortBRED_Location + Sample + TimepointHOSP_RES	gi.NP_418540_1.ARO_3003828.adiY__Escherichia_coli_str__K.12_substr__MG1655_	0.236306	0.796553	0.0619872	0.577947	0.951095	0.268053
Abundance_shortBRED_Location + Sample + TimepointHOSP_RES	gi.WP_042649345.ARO_3002191.MOX.9__Gammaproteobacteria_	0.0982816	0.192478	0.441995	0.436363	0.762263	0.601351
Abundance_shortBRED_Location + Sample + TimepointHOSP_RES	gi.YP_001707639_1.ARO_3000814.mexT__Acinetobacter_baumannii_SDF_	0.26405	0.590332	0.150685	0.577947	0.951095	0.359845
Abundance_shortBRED_Location + Sample + TimepointHOSP_RES	gi.YP_002320475_1.ARO_3000780.adeI__Acinetobacter_baumannii_AB0057_	0.473035	0.353154	0.104924	0.780263	0.828669	0.322844
Abundance_shortBRED_Location + Sample + TimepointHOSP_RES	gi.YP_002743273_1.ARO_3000616.mel__Streptococcus_pneumoniae_Taiwan19F.14_	0.0228858	0.03601	0.597509	0.336104	0.501795	0.69782
Abundance_shortBRED_Location + Sample + TimepointHOSP_RES	gi.YP_003971446.ARO_3003730.Bifidobacteria_intrinsic_ileS_conferring_resistance_to_mupirocin__Bifidobacterium_bifidum_PRL2010_	0.933133	0.0387622	0.355743	0.98875	0.501795	0.531953
Abundance_shortBRED_Location + Sample + TimepointHOSP_RES	gi.YP_006142099_1.ARO_3002601.aadA__Escherichia_coli_UMNK88_	0.893552	0.282251	0.403183	0.96735	0.828669	0.582193
Abundance_shortBRED_Location + Sample + TimepointHOSP_RES	gi.YP_008997285_1.ARO_3000615.mefA__Exiguobacterium_sp__S3.2_	0.4521	0.000540489	0.640809	0.763417	0.0432391	0.723877
Abundance_shortBRED_Location + Sample + TimepointHOSP_RES	gi.YP_009081591_1.ARO_3002613.aadA13__Pseudomonas_aeruginosa_	0.558942	0.313546	0.148014	0.843687	0.828669	0.359845
Abundance_shortBRED_Location + Sample + TimepointHOSP_RES	gi.YP_489321_1.ARO_3001329.mdtG__Escherichia_coli_str__K.12_substr__W3110_	0.498963	0.849342	0.171095	0.806405	0.951095	0.371684
Abundance_shortBRED_Location + Sample + TimepointHOSP_RES	gi.YP_489794_1.ARO_3000263.marA__Escherichia_coli_str__K.12_substr__W3110_	0.681609	0.788011	0.937505	0.893914	0.951095	0.949372
Abundance_shortBRED_Location + Sample + TimepointHOSP_RES	gi.YP_490321_1.ARO_3000828.baeR__Escherichia_coli_str__K.12_substr__W3110_	0.0713322	0.0791947	0.0893919	0.4161	0.640401	0.297973
Abundance_shortBRED_Location + Sample + TimepointHOSP_RES	gi.YP_490697_1.ARO_3000491.acrD__Escherichia_coli_str__K.12_substr__W3110_	0.84816	0.395551	0.53062	0.96735	0.879002	0.663955
Abundance_shortBRED_Location + Sample + TimepointHOSP_RES	gi.YP_491919_1.ARO_3000508.gadX__Escherichia_coli_str__K.12_substr__W3110_	0.391106	0.624715	0.200018	0.70519	0.951095	0.410294
Abundance_shortBRED_Location + Sample + TimepointHOSP_RES	gi.YP_492255_1.ARO_3003583.PmrB__Escherichia_coli_str__K.12_substr__W3110_	0.240634	0.909485	0.0483117	0.577947	0.951095	0.241559
Abundance_shortBRED_Location + Sample + TimepointHOSP_RES	gi.YP_724476_1.ARO_3003109.msrE__Escherichia_coli_	0.271955	0.436268	0.00627118	0.577947	0.899017	0.0887736
Test and Covariates Used	ShortBRED Gene and Organism	Location	Sample	Timepoint	adjusted_Location	adjusted_Sample	adjusted_Timepoint
Abundance_shortBRED_Location + Sample + TimepointINF_FCE	SHV_38	0.374338	0.0634427	0.267052	0.847711	0.0778997	0.741528
Abundance_shortBRED_Location + Sample + TimepointINF_FCE	gi.AAA22419_1.ARO_3000522.ErmG__Lysinibacillus_sphaericus_	0.873041	0.00182147	0.217409	0.941714	0.00512693	0.738294
Abundance_shortBRED_Location + Sample + TimepointINF_FCE	gi.AAA23033_1.ARO_3000190.tetO__Campylobacter_jejuni_	0.93338	1.79e-05	0.147538	0.941714	0.000346452	0.738294
Abundance_shortBRED_Location + Sample + TimepointINF_FCE	gi.AAA26779_1.ARO_3001303.ErmO__Streptomyces_lividans_	0.0912379	0.532331	0.773124	0.602568	0.537084	0.882455
Abundance_shortBRED_Location + Sample + TimepointINF_FCE	gi.AAA27431_1.ARO_3000498.ErmF__Bacteroides_fragilis_	0.230064	0.000103097	0.303738	0.659903	0.000799148	0.741528
Abundance_shortBRED_Location + Sample + TimepointINF_FCE	gi.AAA27471_1.ARO_3000205.tetX__Bacteroides_fragilis_	0.388684	0.00191607	0.289988	0.847711	0.00515514	0.741528
Abundance_shortBRED_Location + Sample + TimepointINF_FCE	gi.AAA71915_1.ARO_3000173.tetE__Escherichia_coli_	0.145538	0.00109184	0.673925	0.635878	0.00373621	0.855657
Abundance_shortBRED_Location + Sample + TimepointINF_FCE	gi.AAA88552_1.ARO_3002541.AAC.3..VIIa__Streptomyces_rimosus_	0.251316	0.0917368	0.982167	0.692653	0.106869	0.992215
Abundance_shortBRED_Location + Sample + TimepointINF_FCE	gi.AAC09015_1.ARO_3002481.AER.1__Aeromonas_hydrophila_	0.0885692	0.000106082	0.833987	0.602568	0.000799148	0.897694
Abundance_shortBRED_Location + Sample + TimepointINF_FCE	gi.AAC41449_1.ARO_3001398.OXA.3__Pseudomonas_aeruginosa_	0.0233597	0.490413	0.516204	0.602568	0.499249	0.802193
Abundance_shortBRED_Location + Sample + TimepointINF_FCE	gi.AAC45086_2.ARO_3001821.ACT.1__Klebsiella_pneumoniae_	0.153204	0.00104579	0.216427	0.635878	0.00369296	0.738294
Abundance_shortBRED_Location + Sample + TimepointINF_FCE	gi.AAC45607_1.ARO_3000375.ErmB__Lactobacillus_fermentum_	0.731475	0.00258756	0.308423	0.88978	0.00664532	0.741528
Abundance_shortBRED_Location + Sample + TimepointINF_FCE	gi.AAC74149_2.ARO_3001216.mdtH__Escherichia_coli_str__K.12_substr__MG1655_	0.41318	0.0417494	0.418911	0.847711	0.0568395	0.758477
Abundance_shortBRED_Location + Sample + TimepointINF_FCE	gi.AAC75314_1.ARO_3003578.PmrF__Escherichia_coli_str__K.12_substr__MG1655_	0.394482	0.0626664	0.890731	0.847711	0.0778997	0.923418
Abundance_shortBRED_Location + Sample + TimepointINF_FCE	gi.AAC75315_1.ARO_3002985.arnA__Escherichia_coli_str__K.12_substr__MG1655_	0.680125	0.020314	0.536887	0.8818	0.0323307	0.802193
Abundance_shortBRED_Location + Sample + TimepointINF_FCE	gi.AAC75429_1.ARO_3000833.evgS__Escherichia_coli_str__K.12_substr__MG1655_	0.52306	0.0299494	0.83414	0.87916	0.0424661	0.897694
Abundance_shortBRED_Location + Sample + TimepointINF_FCE	gi.AAC75733_1.ARO_3000074.emrB__Escherichia_coli_str__K.12_substr__MG1655_	0.754972	0.00116164	0.368882	0.898019	0.00375043	0.758477
Abundance_shortBRED_Location + Sample + TimepointINF_FCE	gi.AAC76093_1.ARO_3002986.bacA__Escherichia_coli_str__K.12_substr__MG1655_	0.932162	0.0546113	0.653686	0.941714	0.070932	0.849934
Abundance_shortBRED_Location + Sample + TimepointINF_FCE	gi.AAC76297_1.ARO_3000499.acrE__Escherichia_coli_str__K.12_substr__MG1655_	0.192498	0.0300355	0.546636	0.635878	0.0424661	0.802193
Abundance_shortBRED_Location + Sample + TimepointINF_FCE	gi.AAC76298_1.ARO_3000502.acrF__Escherichia_coli_str__K.12_substr__MG1655_	0.698592	0.00907277	0.983435	0.8818	0.0166265	0.992215
Abundance_shortBRED_Location + Sample + TimepointINF_FCE	gi.AAC76539_1.ARO_3000796.mdtF__Escherichia_coli_str__K.12_substr__MG1655_	0.179115	0.009536	0.163955	0.635878	0.0171043	0.738294
Abundance_shortBRED_Location + Sample + TimepointINF_FCE	gi.AAC76733_1.ARO_3001215.mdtL__Escherichia_coli_str__K.12_substr__MG1655_	0.140691	0.0382517	0.281627	0.635878	0.0533635	0.741528
Abundance_shortBRED_Location + Sample + TimepointINF_FCE	gi.AAC77293_1.ARO_3001214.mdtM__Escherichia_coli_str__K.12_substr__MG1655_	0.905521	0.00323179	0.146051	0.941714	0.00760817	0.738294
Abundance_shortBRED_Location + Sample + TimepointINF_FCE	gi.AAC78336_1.ARO_3002826.EreA2__Providencia_stuartii_	0.0487728	0.26339	0.29661	0.602568	0.278159	0.741528
Abundance_shortBRED_Location + Sample + TimepointINF_FCE	gi.AAD01868_1.ARO_3002867.dfrF__Enterococcus_faecalis_	0.649793	9.36e-05	0.738233	0.8818	0.000799148	0.868961
Abundance_shortBRED_Location + Sample + TimepointINF_FCE	gi.AAF04388_1.ARO_3001871.CTX.M.8__Citrobacter_amalonaticus_	0.324243	0.190654	0.258396	0.814211	0.203244	0.741528
Abundance_shortBRED_Location + Sample + TimepointINF_FCE	gi.AAF17880_1.ARO_3002605.aadA5__Escherichia_coli_	0.361522	0.166625	0.459128	0.847711	0.180684	0.762962
Abundance_shortBRED_Location + Sample + TimepointINF_FCE	gi.AAF27726_1.ARO_3002694.cmlA4__Klebsiella_pneumoniae_	0.187811	0.000545486	0.36799	0.635878	0.00212551	0.758477
Abundance_shortBRED_Location + Sample + TimepointINF_FCE	gi.AAK55330_1.ARO_3001768.OXA.118__Burkholderia_cepacia_	0.932693	0.0225368	0.996687	0.941714	0.0348858	0.996687
Abundance_shortBRED_Location + Sample + TimepointINF_FCE	gi.AAL51021_2.ARO_3002598.ANT.3__..Ii.AAC.6_..IId_fusion_protein__Serratia_marcescens_	0.900165	6.29e-05	0.125418	0.941714	0.000646071	0.738294
Abundance_shortBRED_Location + Sample + TimepointINF_FCE	gi.AAL59753_1.ARO_3000412.sul2__Vibrio_cholerae_	0.065584	0.00186021	0.733622	0.602568	0.00512693	0.868961
Abundance_shortBRED_Location + Sample + TimepointINF_FCE	gi.AAO16462_1.ARO_3000167.tetC__uncultured_bacterium_	0.152348	1.36e-05	0.265167	0.635878	0.000346452	0.741528
Abundance_shortBRED_Location + Sample + TimepointINF_FCE	gi.AAS13767_1.ARO_3003839.Mrx__Aeromonas_hydrophila_	0.077227	0.00350477	0.334689	0.602568	0.00776548	0.758477
Abundance_shortBRED_Location + Sample + TimepointINF_FCE	gi.AAS48620_1.ARO_3002372.VEB.3__Enterobacter_cloacae_	0.154256	0.0641121	0.44895	0.635878	0.0778997	0.762962
Abundance_shortBRED_Location + Sample + TimepointINF_FCE	gi.AAW66497_1.ARO_3000566.tet39__Acinetobacter_sp__LUH5605_	0.701977	3.13e-05	0.0699091	0.8818	0.000504467	0.738294
Abundance_shortBRED_Location + Sample + TimepointINF_FCE	gi.AAY32951_1.ARO_3002837.lnuC__Streptococcus_agalactiae_	0.652642	0.00149445	0.545335	0.8818	0.00444402	0.802193
Abundance_shortBRED_Location + Sample + TimepointINF_FCE	gi.AAY43207_1.ARO_3002338.GES.9__Pseudomonas_aeruginosa_	0.891172	0.00273891	0.412241	0.941714	0.00687771	0.758477
Abundance_shortBRED_Location + Sample + TimepointINF_FCE	gi.AAZ42322_1.ARO_3003836.qacH__Vibrio_cholerae_	0.107168	0.573847	0.790909	0.602568	0.573847	0.882709
Abundance_shortBRED_Location + Sample + TimepointINF_FCE	gi.ABD58917_1.ARO_3002615.aadA15__Pseudomonas_aeruginosa_	0.311784	0.000283922	0.670806	0.800717	0.00145832	0.855657
Abundance_shortBRED_Location + Sample + TimepointINF_FCE	gi.ABF47470_1.ARO_3002791.QnrS2__Salmonella_enterica_subsp__enterica_serovar_Anatum_	0.921792	0.000150195	0.549472	0.941714	0.000919646	0.802193
Abundance_shortBRED_Location + Sample + TimepointINF_FCE	gi.ABG77966_1.ARO_3000216.acrB__Enterobacter_cloacae_	0.653635	0.0177826	0.19518	0.8818	0.0291223	0.738294
Abundance_shortBRED_Location + Sample + TimepointINF_FCE	gi.ABK33456_1.ARO_3002639.APH.3__..Ib__Pseudomonas_aeruginosa_	0.628423	1.22e-05	0.27321	0.8818	0.000346452	0.741528
Abundance_shortBRED_Location + Sample + TimepointINF_FCE	gi.ACA23185_1.ARO_3000194.tetW__Bifidobacterium_longum_	0.571702	4.56e-05	0.170712	0.8818	0.000572517	0.738294
Abundance_shortBRED_Location + Sample + TimepointINF_FCE	gi.ACG70184_1.ARO_3002788.QnrD1__Salmonella_enterica_subsp__enterica_serovar_Bovismorbificans_	0.657082	0.0091225	0.769621	0.8818	0.0166265	0.882455
Abundance_shortBRED_Location + Sample + TimepointINF_FCE	gi.ACI32877_1.ARO_3002859.dfrA14__Escherichia_coli_	0.13525	0.00036351	0.790684	0.635878	0.00171152	0.882709
Abundance_shortBRED_Location + Sample + TimepointINF_FCE	gi.ACJ63262_1.ARO_3003107.mefB__Escherichia_coli_	0.594431	0.0139985	0.796782	0.8818	0.0236095	0.882709
Abundance_shortBRED_Location + Sample + TimepointINF_FCE	gi.ACN32294_1.ARO_3000237.tolC__Escherichia_coli_	0.49741	0.00340218	0.168289	0.87916	0.00768892	0.738294
Abundance_shortBRED_Location + Sample + TimepointINF_FCE	gi.ACO72579_1.ARO_3001801.OXA.147__Pseudomonas_aeruginosa_	0.30157	0.0472981	0.867459	0.800717	0.0628786	0.917649
Abundance_shortBRED_Location + Sample + TimepointINF_FCE	gi.ACR57831_1.ARO_3003022.dfrB3__Klebsiella_oxytoca_	0.0393773	0.285049	0.654374	0.602568	0.295509	0.849934
Abundance_shortBRED_Location + Sample + TimepointINF_FCE	gi.ACS44784_1.ARO_3002185.MOX.6__Aeromonas_caviae_	0.673397	0.00214235	0.458573	0.8818	0.00562989	0.762962
Abundance_shortBRED_Location + Sample + TimepointINF_FCE	gi.ACT97371_1.ARO_3003097.CfxA6__uncultured_organism_	0.576856	0.000154631	0.0614761	0.8818	0.000919646	0.738294
Abundance_shortBRED_Location + Sample + TimepointINF_FCE	gi.ACT97415_1.ARO_3002999.CblA.1__mixed_culture_bacterium_AX_gF3SD01_15_	0.410375	0.0107885	0.124637	0.847711	0.0190485	0.738294
Abundance_shortBRED_Location + Sample + TimepointINF_FCE	gi.AEJ33969_1.ARO_3000410.sul1__Vibrio_fluvialis_	0.0247162	0.301568	0.567924	0.602568	0.309792	0.802193
Abundance_shortBRED_Location + Sample + TimepointINF_FCE	gi.AEL31272_1.ARO_3002756.QnrB41__Citrobacter_freundii_	0.0351907	0.000483649	0.482921	0.602568	0.00208831	0.790871
Abundance_shortBRED_Location + Sample + TimepointINF_FCE	gi.AEQ38567_1.ARO_3002660.APH.6..Id__Escherichia_coli_	0.735224	1.84e-05	0.207845	0.88978	0.000346452	0.738294
Abundance_shortBRED_Location + Sample + TimepointINF_FCE	gi.AET35493_1.ARO_3001777.OXA.347__uncultured_bacterium_	0.919409	0.0684052	0.6966	0.941714	0.0822318	0.868961
Abundance_shortBRED_Location + Sample + TimepointINF_FCE	gi.AEV91550_1.ARO_3001710.OXA.211__Acinetobacter_johnsonii_	0.66222	9.57e-05	0.206061	0.8818	0.000799148	0.738294
Abundance_shortBRED_Location + Sample + TimepointINF_FCE	gi.AFK13827_1.ARO_3000825.robA__Enterobacter_cloacae_	0.306261	0.000533309	0.413206	0.800717	0.00212551	0.758477
Abundance_shortBRED_Location + Sample + TimepointINF_FCE	gi.AFK13828_1.ARO_3000823.ramA__Enterobacter_cloacae_	0.808902	0.00601647	0.145992	0.923292	0.0119274	0.738294
Abundance_shortBRED_Location + Sample + TimepointINF_FCE	gi.AFK31666_1.ARO_3000567.tet40__Streptococcus_suis_	0.457614	0.000132165	0.109689	0.847711	0.000878507	0.738294
Abundance_shortBRED_Location + Sample + TimepointINF_FCE	gi.AFU35066_1.ARO_3000275.linB__Staphylococcus_aureus_	0.647362	0.00403729	0.150154	0.8818	0.00833641	0.738294
Abundance_shortBRED_Location + Sample + TimepointINF_FCE	gi.AGJ01153_1.ARO_3002326.KPC.16__Klebsiella_pneumoniae_	0.188549	0.00378945	0.716661	0.635878	0.00823476	0.868961
Abundance_shortBRED_Location + Sample + TimepointINF_FCE	gi.AGV10818_1.ARO_3002669.APH.2__..Ig__Campylobacter_coli_CVM_N29710_	0.455701	0.0185564	0.10508	0.847711	0.0299554	0.738294
Abundance_shortBRED_Location + Sample + TimepointINF_FCE	gi.AGV10830_1.ARO_3002647.APH.3_..IIIa__Campylobacter_coli_CVM_N29710_	0.849325	0.000116501	0.726149	0.940919	0.000822791	0.868961
Abundance_shortBRED_Location + Sample + TimepointINF_FCE	gi.AHA11125_1.ARO_3001549.OXA.362__Acinetobacter_lwoffii_	0.436661	0.0639163	0.880174	0.847711	0.0778997	0.920922
Abundance_shortBRED_Location + Sample + TimepointINF_FCE	gi.AHA41505_1.ARO_3002930.vanRO__Rhodococcus_equi_	0.481795	0.278489	0.499353	0.87811	0.291382	0.794746
Abundance_shortBRED_Location + Sample + TimepointINF_FCE	gi.AIJ27543_1.ARO_3002629.ANT.6..Ib__Campylobacter_jejuni_	0.233594	0.00184229	0.603051	0.659903	0.00512693	0.831034
Abundance_shortBRED_Location + Sample + TimepointINF_FCE	gi.AJA36815_1.ARO_3003193.QnrVC7__Vibrio_cholerae_	0.105923	0.00549518	0.210917	0.602568	0.0110885	0.738294
Abundance_shortBRED_Location + Sample + TimepointINF_FCE	gi.AJE60855_1.ARO_3003209.FosA5__Escherichia_coli_	0.740171	0.00884185	0.108352	0.88978	0.0166265	0.738294
Abundance_shortBRED_Location + Sample + TimepointINF_FCE	gi.ANK04027_1.ARO_3003838.gadW__Escherichia_coli_O25b_H4_	0.0210434	0.0243719	0.6474	0.602568	0.0367204	0.849934
Abundance_shortBRED_Location + Sample + TimepointINF_FCE	gi.BAD95494_1.ARO_3002895.sat.1__Escherichia_coli_	0.510984	0.0440146	0.153965	0.87916	0.0592101	0.738294
Abundance_shortBRED_Location + Sample + TimepointINF_FCE	gi.BAE77781_1.ARO_3000795.mdtE__Escherichia_coli_str__K.12_substr__W3110_	0.19091	0.0777128	0.70903	0.635878	0.0914744	0.868961
Abundance_shortBRED_Location + Sample + TimepointINF_FCE	gi.BAE77933_1.ARO_3000518.CRP__Escherichia_coli_str__K.12_substr__W3110_	0.111982	0.000267922	0.193041	0.602568	0.00144167	0.738294
Abundance_shortBRED_Location + Sample + TimepointINF_FCE	gi.BAE78082_1.ARO_3003550.mdtP__Escherichia_coli_str__K.12_substr__W3110_	0.192621	0.0557266	0.560465	0.635878	0.071558	0.802193
Abundance_shortBRED_Location + Sample + TimepointINF_FCE	gi.BAE78084_1.ARO_3003548.mdtN__Escherichia_coli_str__K.12_substr__W3110_	0.652354	0.111665	0.191558	0.8818	0.127456	0.738294
Abundance_shortBRED_Location + Sample + TimepointINF_FCE	gi.BAE78116_1.ARO_3003576.PmrC__Escherichia_coli_str__K.12_substr__W3110_	0.653656	0.133268	0.587101	0.8818	0.149101	0.819041
Abundance_shortBRED_Location + Sample + TimepointINF_FCE	gi.BAL43359.ARO_3003742.mphG__Photobacterium_damselae_subsp__damselae_	0.833928	0.000821203	0.150881	0.936514	0.00299342	0.738294
Abundance_shortBRED_Location + Sample + TimepointINF_FCE	gi.BAL43360.ARO_3003745.mefC__Photobacterium_damselae_subsp__damselae_	0.771921	0.000498977	0.176412	0.899248	0.00208831	0.738294
Abundance_shortBRED_Location + Sample + TimepointINF_FCE	gi.CAA28209_1.ARO_3000230.ANT.2__..Ia__uncultured_bacterium_	0.0751804	0.000180601	0.563387	0.602568	0.0010204	0.802193
Abundance_shortBRED_Location + Sample + TimepointINF_FCE	gi.CAA40146_1.ARO_3002997.LCR.1__Pseudomonas_aeruginosa_	0.573217	0.0535511	0.390002	0.8818	0.0703637	0.758477
Abundance_shortBRED_Location + Sample + TimepointINF_FCE	gi.CAA57832_1.ARO_3002670.cat__Morganella_morganii_	0.0369441	0.141342	0.716529	0.602568	0.156585	0.868961
Abundance_shortBRED_Location + Sample + TimepointINF_FCE	gi.CAA71441_1.ARO_3003095.imiS__Aeromonas_veronii_	0.418795	0.0239951	0.263696	0.847711	0.0366412	0.741528
Abundance_shortBRED_Location + Sample + TimepointINF_FCE	gi.CAA79727_1.ARO_3000191.tetQ__Bacteroides_fragilis_	0.440191	0.00405755	0.183534	0.847711	0.00833641	0.738294
Abundance_shortBRED_Location + Sample + TimepointINF_FCE	gi.CAB89086_1.ARO_3002158.FOX.4__Escherichia_coli_	0.221099	0.00112417	0.131978	0.657477	0.00373621	0.738294
Abundance_shortBRED_Location + Sample + TimepointINF_FCE	gi.CAC41371_1.ARO_3000196.tet32__Clostridiaceae_bacterium_K10_	0.0593932	0.0220704	0.868924	0.602568	0.0346383	0.917649
Abundance_shortBRED_Location + Sample + TimepointINF_FCE	gi.CAC85660_1.ARO_3000960.TEM.93__Escherichia_coli_	0.199279	0.000597032	0.381531	0.635878	0.00224882	0.758477
Abundance_shortBRED_Location + Sample + TimepointINF_FCE	gi.CAD55718_1.ARO_3000197.tet36__Bacteroides_coprosuis_DSM_18011_	0.510131	0.167892	0.748465	0.87916	0.180684	0.871923
Abundance_shortBRED_Location + Sample + TimepointINF_FCE	gi.CAG27791_1.ARO_3000316.mphA__uncultured_bacterium_	0.183542	0.00391024	0.404725	0.635878	0.00833641	0.758477
Abundance_shortBRED_Location + Sample + TimepointINF_FCE	gi.CAP69660_1.ARO_3001811.OXA.129__Salmonella_enterica_subsp__enterica_serovar_Bredeney_	0.594833	5.63e-05	0.209138	0.8818	0.000635859	0.738294
Abundance_shortBRED_Location + Sample + TimepointINF_FCE	gi.CAQ03505_1.ARO_3001338.SHV.100__Klebsiella_pneumoniae_	0.526069	0.00331098	0.653409	0.87916	0.00763552	0.849934
Abundance_shortBRED_Location + Sample + TimepointINF_FCE	gi.CCP46065_1.ARO_3000816.mtrA__Mycobacterium_tuberculosis_H37Rv_	0.39768	0.109146	0.388879	0.847711	0.125852	0.758477
Abundance_shortBRED_Location + Sample + TimepointINF_FCE	gi.EFF04178_1.ARO_3000309.emrD__Escherichia_coli_B185_	0.208208	0.0738127	0.302204	0.635878	0.0877983	0.741528
Abundance_shortBRED_Location + Sample + TimepointINF_FCE	gi.NP_312864_1.ARO_3000830.cpxA__Escherichia_coli_O157_H7_str__Sakai_	0.453232	0.0118062	0.395779	0.847711	0.0205246	0.758477
Abundance_shortBRED_Location + Sample + TimepointINF_FCE	gi.NP_312865_1.ARO_3000831.cpxR__Escherichia_coli_O157_H7_str__Sakai_	0.574519	0.0400816	0.518283	0.8818	0.0552344	0.802193
Abundance_shortBRED_Location + Sample + TimepointINF_FCE	gi.NP_414618_4.ARO_3003843.leuO__Escherichia_coli_str__K.12_substr__MG1655_	0.837061	0.0300645	0.438625	0.936514	0.0424661	0.762533
Abundance_shortBRED_Location + Sample + TimepointINF_FCE	gi.NP_414996_1.ARO_3000207.acrA__Escherichia_coli_str__K.12_substr__MG1655_	0.0832776	7.87e-06	0.436487	0.602568	0.000346452	0.762533
Abundance_shortBRED_Location + Sample + TimepointINF_FCE	gi.NP_415791_1.ARO_3003840.aminocoumarin_resistant_cysB__Escherichia_coli_str__K.12_substr__MG1655_	0.961661	0.0588066	0.957527	0.961661	0.0746646	0.983641
Abundance_shortBRED_Location + Sample + TimepointINF_FCE	gi.NP_417169_1.ARO_3000516.emrR__Escherichia_coli_str__K.12_substr__MG1655_	0.711633	0.0284497	0.152159	0.883676	0.0417509	0.738294
Abundance_shortBRED_Location + Sample + TimepointINF_FCE	gi.NP_417177_1.ARO_3003830.aminocoumarin_resistant_alaS__Escherichia_coli_str__K.12_substr__MG1655_	0.102285	0.0250893	0.3629	0.602568	0.0373038	0.758477
Abundance_shortBRED_Location + Sample + TimepointINF_FCE	gi.NP_417969_1.ARO_3003834.gadE__Escherichia_coli_str__K.12_substr__MG1655_	0.342124	0.00617845	0.13372	0.840434	0.0120373	0.738294
Abundance_shortBRED_Location + Sample + TimepointINF_FCE	gi.WP_042649345.ARO_3002191.MOX.9__Gammaproteobacteria_	0.0831978	0.0157471	0.341745	0.602568	0.026168	0.758477
Abundance_shortBRED_Location + Sample + TimepointINF_FCE	gi.YP_001707639_1.ARO_3000814.mexT__Acinetobacter_baumannii_SDF_	0.859903	0.013051	0.238963	0.941714	0.022345	0.741528
Abundance_shortBRED_Location + Sample + TimepointINF_FCE	gi.YP_002743273_1.ARO_3000616.mel__Streptococcus_pneumoniae_Taiwan19F.14_	0.702318	0.000342611	0.171654	0.8818	0.00168326	0.738294
Abundance_shortBRED_Location + Sample + TimepointINF_FCE	gi.YP_003971446.ARO_3003730.Bifidobacteria_intrinsic_ileS_conferring_resistance_to_mupirocin__Bifidobacterium_bifidum_PRL2010_	0.0601042	0.00742439	0.220727	0.602568	0.0142196	0.738294
Abundance_shortBRED_Location + Sample + TimepointINF_FCE	gi.YP_006142099_1.ARO_3002601.aadA__Escherichia_coli_UMNK88_	0.681656	0.00139368	0.422868	0.8818	0.00437462	0.758477
Abundance_shortBRED_Location + Sample + TimepointINF_FCE	gi.YP_008997285_1.ARO_3000615.mefA__Exiguobacterium_sp__S3.2_	0.44465	0.000482517	0.222142	0.847711	0.00208831	0.738294
Abundance_shortBRED_Location + Sample + TimepointINF_FCE	gi.YP_009081591_1.ARO_3002613.aadA13__Pseudomonas_aeruginosa_	0.792836	1.21e-07	0.64687	0.914188	1.36e-05	0.849934
Abundance_shortBRED_Location + Sample + TimepointINF_FCE	gi.YP_489321_1.ARO_3001329.mdtG__Escherichia_coli_str__K.12_substr__W3110_	0.768263	0.0029563	0.239782	0.899248	0.00718788	0.741528
Abundance_shortBRED_Location + Sample + TimepointINF_FCE	gi.YP_489794_1.ARO_3000263.marA__Escherichia_coli_str__K.12_substr__W3110_	0.0384459	0.00298965	0.811006	0.602568	0.00718788	0.889744
Abundance_shortBRED_Location + Sample + TimepointINF_FCE	gi.YP_490321_1.ARO_3000828.baeR__Escherichia_coli_str__K.12_substr__W3110_	0.658868	0.00147542	0.388902	0.8818	0.00444402	0.758477
Abundance_shortBRED_Location + Sample + TimepointINF_FCE	gi.YP_491919_1.ARO_3000508.gadX__Escherichia_coli_str__K.12_substr__W3110_	0.206404	0.12295	0.492111	0.635878	0.138934	0.794407
Abundance_shortBRED_Location + Sample + TimepointINF_FCE	gi.YP_492255_1.ARO_3003583.PmrB__Escherichia_coli_str__K.12_substr__W3110_	0.529052	0.151265	0.374079	0.87916	0.165951	0.758477
Abundance_shortBRED_Location + Sample + TimepointINF_FCE	gi.YP_724476_1.ARO_3003109.msrE__Escherichia_coli_	0.456914	4.42e-05	0.207644	0.847711	0.000572517	0.738294
Test and Covariates Used	ShortBRED Gene and Organism	Location	Sample	Timepoint	adjusted_Location	adjusted_Sample	adjusted_Timepoint
Abundance_shortBRED_Location + Sample + TimepointINF_PCE	gi.AAA22419_1.ARO_3000522.ErmG__Lysinibacillus_sphaericus_	0.881625	0.802685	0.00781318	0.939765	0.967753	0.134833
Abundance_shortBRED_Location + Sample + TimepointINF_PCE	gi.AAA22904_1.ARO_3000578.CcrA_beta.lactamase__Bacteroides_fragilis_	0.0953594	0.695677	0.359494	0.334572	0.967753	0.534231
Abundance_shortBRED_Location + Sample + TimepointINF_PCE	gi.AAA23033_1.ARO_3000190.tetO__Campylobacter_jejuni_	0.266692	0.00441782	0.0073926	0.495804	0.640584	0.134833
Abundance_shortBRED_Location + Sample + TimepointINF_PCE	gi.AAA25293_1.ARO_3000192.tetS__Listeria_monocytogenes_	0.8536	0.167721	0.185584	0.939765	0.810652	0.391503
Abundance_shortBRED_Location + Sample + TimepointINF_PCE	gi.AAA26412_1.ARO_3002642.APH.3_..Ib__Plasmid_RP4_	0.331349	0.190404	0.0358696	0.565242	0.859534	0.169861
Abundance_shortBRED_Location + Sample + TimepointINF_PCE	gi.AAA26779_1.ARO_3001303.ErmO__Streptomyces_lividans_	0.120699	0.11678	0.0932956	0.350027	0.792366	0.270557
Abundance_shortBRED_Location + Sample + TimepointINF_PCE	gi.AAA27431_1.ARO_3000498.ErmF__Bacteroides_fragilis_	0.0465273	0.820945	0.0335632	0.246517	0.967753	0.169861
Abundance_shortBRED_Location + Sample + TimepointINF_PCE	gi.AAA27471_1.ARO_3000205.tetX__Bacteroides_fragilis_	0.722589	0.463476	0.044046	0.84516	0.967753	0.172613
Abundance_shortBRED_Location + Sample + TimepointINF_PCE	gi.AAA71915_1.ARO_3000173.tetE__Escherichia_coli_	0.113818	0.558494	0.869234	0.336808	0.967753	0.887598
Abundance_shortBRED_Location + Sample + TimepointINF_PCE	gi.AAA88552_1.ARO_3002541.AAC.3..VIIa__Streptomyces_rimosus_	0.329635	0.762749	0.757925	0.565242	0.967753	0.808081
Abundance_shortBRED_Location + Sample + TimepointINF_PCE	gi.AAA98406_1.ARO_3001404.OXA.9__Klebsiella_pneumoniae_	0.622627	0.565326	0.433835	0.79946	0.967753	0.568196
Abundance_shortBRED_Location + Sample + TimepointINF_PCE	gi.AAB46602_1.ARO_3002701.cmr__Corynebacterium_glutamicum_	0.140137	0.618175	0.0332292	0.376294	0.967753	0.169861
Abundance_shortBRED_Location + Sample + TimepointINF_PCE	gi.AAB53445_1.ARO_3002897.sat.4__Campylobacter_coli_	0.348257	0.358236	0.618457	0.573833	0.93723	0.684552
Abundance_shortBRED_Location + Sample + TimepointINF_PCE	gi.AAC09015_1.ARO_3002481.AER.1__Aeromonas_hydrophila_	0.27574	0.788344	0.327331	0.501911	0.967753	0.50966
Abundance_shortBRED_Location + Sample + TimepointINF_PCE	gi.AAC41449_1.ARO_3001398.OXA.3__Pseudomonas_aeruginosa_	0.493841	0.235207	0.00364524	0.714462	0.859534	0.134833
Abundance_shortBRED_Location + Sample + TimepointINF_PCE	gi.AAC45086_2.ARO_3001821.ACT.1__Klebsiella_pneumoniae_	0.0367276	0.523312	0.150387	0.231575	0.967753	0.363075
Abundance_shortBRED_Location + Sample + TimepointINF_PCE	gi.AAC45607_1.ARO_3000375.ErmB__Lactobacillus_fermentum_	0.408142	0.112283	0.0323393	0.643572	0.792366	0.169861
Abundance_shortBRED_Location + Sample + TimepointINF_PCE	gi.AAC74149_2.ARO_3001216.mdtH__Escherichia_coli_str__K.12_substr__MG1655_	0.108447	0.764668	0.15997	0.334572	0.967753	0.363075
Abundance_shortBRED_Location + Sample + TimepointINF_PCE	gi.AAC75135_2.ARO_3000792.mdtA__Escherichia_coli_str__K.12_substr__MG1655_	0.175077	0.418714	0.462011	0.416167	0.967753	0.577514
Abundance_shortBRED_Location + Sample + TimepointINF_PCE	gi.AAC75137_1.ARO_3000794.mdtC__Escherichia_coli_str__K.12_substr__MG1655_	0.0311977	0.204107	0.0430631	0.231575	0.859534	0.172613
Abundance_shortBRED_Location + Sample + TimepointINF_PCE	gi.AAC75138_1.ARO_3001330.mdtD__Escherichia_coli_str__K.12_substr__MG1655_	0.551311	0.330911	0.246639	0.768655	0.926928	0.441515
Abundance_shortBRED_Location + Sample + TimepointINF_PCE	gi.AAC75314_1.ARO_3003578.PmrF__Escherichia_coli_str__K.12_substr__MG1655_	0.0494097	0.384907	0.341346	0.246517	0.945959	0.521002
Abundance_shortBRED_Location + Sample + TimepointINF_PCE	gi.AAC75315_1.ARO_3002985.arnA__Escherichia_coli_str__K.12_substr__MG1655_	0.558131	0.838487	0.204299	0.769865	0.967753	0.394978
Abundance_shortBRED_Location + Sample + TimepointINF_PCE	gi.AAC75429_1.ARO_3000833.evgS__Escherichia_coli_str__K.12_substr__MG1655_	0.666008	0.915945	0.565022	0.826248	0.967753	0.639214
Abundance_shortBRED_Location + Sample + TimepointINF_PCE	gi.AAC75733_1.ARO_3000074.emrB__Escherichia_coli_str__K.12_substr__MG1655_	0.104354	0.0523727	0.0192041	0.334572	0.792366	0.152051
Abundance_shortBRED_Location + Sample + TimepointINF_PCE	gi.AAC76093_1.ARO_3002986.bacA__Escherichia_coli_str__K.12_substr__MG1655_	0.318392	0.465936	0.95839	0.56301	0.967753	0.95839
Abundance_shortBRED_Location + Sample + TimepointINF_PCE	gi.AAC76296_1.ARO_3000656.acrS__Escherichia_coli_str__K.12_substr__MG1655_	0.0342291	0.809751	0.439268	0.231575	0.967753	0.568196
Abundance_shortBRED_Location + Sample + TimepointINF_PCE	gi.AAC76297_1.ARO_3000499.acrE__Escherichia_coli_str__K.12_substr__MG1655_	0.883184	0.863704	0.5894	0.939765	0.967753	0.657408
Abundance_shortBRED_Location + Sample + TimepointINF_PCE	gi.AAC76298_1.ARO_3000502.acrF__Escherichia_coli_str__K.12_substr__MG1655_	0.131994	0.901307	0.897067	0.36605	0.967753	0.903297
Abundance_shortBRED_Location + Sample + TimepointINF_PCE	gi.AAC76539_1.ARO_3000796.mdtF__Escherichia_coli_str__K.12_substr__MG1655_	0.0893782	0.133656	0.0125616	0.332304	0.792366	0.14595
Abundance_shortBRED_Location + Sample + TimepointINF_PCE	gi.AAC76733_1.ARO_3001215.mdtL__Escherichia_coli_str__K.12_substr__MG1655_	0.0100437	0.947731	0.0421779	0.103136	0.967753	0.172613
Abundance_shortBRED_Location + Sample + TimepointINF_PCE	gi.AAC77293_1.ARO_3001214.mdtM__Escherichia_coli_str__K.12_substr__MG1655_	0.724372	0.364155	0.415999	0.84516	0.93723	0.568196
Abundance_shortBRED_Location + Sample + TimepointINF_PCE	gi.AAC78336_1.ARO_3002826.EreA2__Providencia_stuartii_	0.251364	0.120661	0.0599691	0.492538	0.792366	0.202716
Abundance_shortBRED_Location + Sample + TimepointINF_PCE	gi.AAD01868_1.ARO_3002867.dfrF__Enterococcus_faecalis_	0.107619	0.768285	0.543466	0.334572	0.967753	0.638707
Abundance_shortBRED_Location + Sample + TimepointINF_PCE	gi.AAF04388_1.ARO_3001871.CTX.M.8__Citrobacter_amalonaticus_	0.18708	0.846426	0.208845	0.417331	0.967753	0.398245
Abundance_shortBRED_Location + Sample + TimepointINF_PCE	gi.AAF17880_1.ARO_3002605.aadA5__Escherichia_coli_	0.722245	0.296391	0.0491667	0.84516	0.859534	0.178229
Abundance_shortBRED_Location + Sample + TimepointINF_PCE	gi.AAF27726_1.ARO_3002694.cmlA4__Klebsiella_pneumoniae_	0.00568488	0.0763775	0.300601	0.103136	0.792366	0.495309
Abundance_shortBRED_Location + Sample + TimepointINF_PCE	gi.AAG03357_1.ARO_3000596.ErmX__Corynebacterium_striatum_	0.623027	0.519174	0.32412	0.79946	0.967753	0.50966
Abundance_shortBRED_Location + Sample + TimepointINF_PCE	gi.AAK55330_1.ARO_3001768.OXA.118__Burkholderia_cepacia_	0.99144	0.868028	0.492931	0.99144	0.967753	0.604674
Abundance_shortBRED_Location + Sample + TimepointINF_PCE	gi.AAL51021_2.ARO_3002598.ANT.3__..Ii.AAC.6_..IId_fusion_protein__Serratia_marcescens_	0.0709109	0.783936	0.446742	0.313333	0.967753	0.568224
Abundance_shortBRED_Location + Sample + TimepointINF_PCE	gi.AAL59753_1.ARO_3000412.sul2__Vibrio_cholerae_	0.0498969	0.469783	0.274024	0.246517	0.967753	0.467452
Abundance_shortBRED_Location + Sample + TimepointINF_PCE	gi.AAL82588_1.ARO_3002600.AAC.3..Ib_AAC.6_..Ib____Pseudomonas_aeruginosa_	0.145052	0.691102	0.100086	0.382409	0.967753	0.279086
Abundance_shortBRED_Location + Sample + TimepointINF_PCE	gi.AAM92464_1.ARO_3002594.AAC.6_..IIa__Salmonella_enterica_subsp__enterica_serovar_Typhi_	0.227267	0.884323	0.0316114	0.45769	0.967753	0.169861
Abundance_shortBRED_Location + Sample + TimepointINF_PCE	gi.AAO16462_1.ARO_3000167.tetC__uncultured_bacterium_	0.650028	0.700604	0.234056	0.826248	0.967753	0.424227
Abundance_shortBRED_Location + Sample + TimepointINF_PCE	gi.AAS13767_1.ARO_3003839.Mrx__Aeromonas_hydrophila_	0.0367326	0.618415	0.211482	0.231575	0.967753	0.398245
Abundance_shortBRED_Location + Sample + TimepointINF_PCE	gi.AAS48620_1.ARO_3002372.VEB.3__Enterobacter_cloacae_	0.0232631	0.274477	0.349924	0.187397	0.859534	0.528531
Abundance_shortBRED_Location + Sample + TimepointINF_PCE	gi.AAW66497_1.ARO_3000566.tet39__Acinetobacter_sp__LUH5605_	0.0399489	0.476716	0.0218866	0.231703	0.967753	0.152051
Abundance_shortBRED_Location + Sample + TimepointINF_PCE	gi.AAY32951_1.ARO_3002837.lnuC__Streptococcus_agalactiae_	0.728586	0.0851723	0.200801	0.84516	0.792366	0.394978
Abundance_shortBRED_Location + Sample + TimepointINF_PCE	gi.AAY43207_1.ARO_3002338.GES.9__Pseudomonas_aeruginosa_	0.213972	0.900807	0.77185	0.455777	0.967753	0.816921
Abundance_shortBRED_Location + Sample + TimepointINF_PCE	gi.AAZ42322_1.ARO_3003836.qacH__Vibrio_cholerae_	0.0718749	0.371858	0.535086	0.313333	0.93723	0.635963
Abundance_shortBRED_Location + Sample + TimepointINF_PCE	gi.ABD58917_1.ARO_3002615.aadA15__Pseudomonas_aeruginosa_	0.965902	0.941321	0.378804	0.978323	0.967753	0.549265
Abundance_shortBRED_Location + Sample + TimepointINF_PCE	gi.ABF47470_1.ARO_3002791.QnrS2__Salmonella_enterica_subsp__enterica_serovar_Anatum_	0.219854	0.716925	0.437379	0.455777	0.967753	0.568196
Abundance_shortBRED_Location + Sample + TimepointINF_PCE	gi.ABF47919_1.ARO_3001631.OXA.96__Acinetobacter_baumannii_	0.562798	0.150328	0.361066	0.769865	0.792366	0.534231
Abundance_shortBRED_Location + Sample + TimepointINF_PCE	gi.ABF66011_1.ARO_3002881.lmrC__Lactococcus_lactis_subsp__lactis_	0.672395	0.598358	0.0472481	0.826248	0.967753	0.176934
Abundance_shortBRED_Location + Sample + TimepointINF_PCE	gi.ABG77966_1.ARO_3000216.acrB__Enterobacter_cloacae_	0.280378	0.564199	0.106769	0.501911	0.967753	0.286695
Abundance_shortBRED_Location + Sample + TimepointINF_PCE	gi.ABK33456_1.ARO_3002639.APH.3__..Ib__Pseudomonas_aeruginosa_	0.0190984	0.0810263	0.135978	0.162898	0.792366	0.352086
Abundance_shortBRED_Location + Sample + TimepointINF_PCE	gi.ACA23185_1.ARO_3000194.tetW__Bifidobacterium_longum_	0.223174	0.238975	0.0822155	0.455777	0.859534	0.243291
Abundance_shortBRED_Location + Sample + TimepointINF_PCE	gi.ACF17980_1.ARO_3002616.aadA16__Escherichia_coli_	0.183577	0.531451	0.442801	0.417331	0.967753	0.568196
Abundance_shortBRED_Location + Sample + TimepointINF_PCE	gi.ACG70184_1.ARO_3002788.QnrD1__Salmonella_enterica_subsp__enterica_serovar_Bovismorbificans_	0.369743	0.100676	0.803291	0.602391	0.792366	0.837966
Abundance_shortBRED_Location + Sample + TimepointINF_PCE	gi.ACI32877_1.ARO_3002859.dfrA14__Escherichia_coli_	0.00971084	0.811506	0.142552	0.103136	0.967753	0.356381
Abundance_shortBRED_Location + Sample + TimepointINF_PCE	gi.ACJ61335_1.ARO_3002249.CARB.10__Acinetobacter_baumannii_	0.596037	0.560338	0.127341	0.792893	0.967753	0.335718
Abundance_shortBRED_Location + Sample + TimepointINF_PCE	gi.ACJ63262_1.ARO_3003107.mefB__Escherichia_coli_	0.662865	0.422832	0.624472	0.826248	0.967753	0.685973
Abundance_shortBRED_Location + Sample + TimepointINF_PCE	gi.ACN32294_1.ARO_3000237.tolC__Escherichia_coli_	0.169832	0.156663	0.304623	0.416167	0.792366	0.496296
Abundance_shortBRED_Location + Sample + TimepointINF_PCE	gi.ACO72579_1.ARO_3001801.OXA.147__Pseudomonas_aeruginosa_	0.916072	0.260243	0.0713333	0.961472	0.859534	0.224855
Abundance_shortBRED_Location + Sample + TimepointINF_PCE	gi.ACR57831_1.ARO_3003022.dfrB3__Klebsiella_oxytoca_	0.49766	0.586336	0.0475892	0.714462	0.967753	0.176934
Abundance_shortBRED_Location + Sample + TimepointINF_PCE	gi.ACS44784_1.ARO_3002185.MOX.6__Aeromonas_caviae_	0.542896	0.809465	0.202696	0.764271	0.967753	0.394978
Abundance_shortBRED_Location + Sample + TimepointINF_PCE	gi.ACT97371_1.ARO_3003097.CfxA6__uncultured_organism_	0.00679531	0.278873	2.34e-06	0.103136	0.859534	0.000339119
Abundance_shortBRED_Location + Sample + TimepointINF_PCE	gi.ACT97415_1.ARO_3002999.CblA.1__mixed_culture_bacterium_AX_gF3SD01_15_	0.107332	0.857248	0.00981216	0.334572	0.967753	0.139613
Abundance_shortBRED_Location + Sample + TimepointINF_PCE	gi.ADY02545_1.ARO_3001960.CTX.M.101__Escherichia_coli_	0.328422	0.616148	0.518313	0.565242	0.967753	0.626295
Abundance_shortBRED_Location + Sample + TimepointINF_PCE	gi.AEJ33969_1.ARO_3000410.sul1__Vibrio_fluvialis_	0.0997077	0.0394425	0.164399	0.334572	0.767186	0.366736
Abundance_shortBRED_Location + Sample + TimepointINF_PCE	gi.AEL31272_1.ARO_3002756.QnrB41__Citrobacter_freundii_	5.92e-05	0.116753	0.0230698	0.00858247	0.792366	0.152051
Abundance_shortBRED_Location + Sample + TimepointINF_PCE	gi.AEQ38567_1.ARO_3002660.APH.6..Id__Escherichia_coli_	0.0146722	0.537866	0.530476	0.132967	0.967753	0.635695
Abundance_shortBRED_Location + Sample + TimepointINF_PCE	gi.AET35493_1.ARO_3001777.OXA.347__uncultured_bacterium_	0.928318	0.720396	0.139175	0.961472	0.967753	0.354041
Abundance_shortBRED_Location + Sample + TimepointINF_PCE	gi.AEV91550_1.ARO_3001710.OXA.211__Acinetobacter_johnsonii_	0.0793915	0.481375	0.323564	0.313333	0.967753	0.50966
Abundance_shortBRED_Location + Sample + TimepointINF_PCE	gi.AFK13827_1.ARO_3000825.robA__Enterobacter_cloacae_	0.035437	0.87376	0.0269108	0.231575	0.967753	0.162586
Abundance_shortBRED_Location + Sample + TimepointINF_PCE	gi.AFK13828_1.ARO_3000823.ramA__Enterobacter_cloacae_	0.11152	0.793362	0.0105913	0.336808	0.967753	0.139613
Abundance_shortBRED_Location + Sample + TimepointINF_PCE	gi.AFK31666_1.ARO_3000567.tet40__Streptococcus_suis_	0.133798	0.0423275	0.00499351	0.36605	0.767186	0.134833
Abundance_shortBRED_Location + Sample + TimepointINF_PCE	gi.AFU35065_1.ARO_3003206.lsaE__Staphylococcus_aureus_	0.880491	0.150015	0.832444	0.939765	0.792366	0.856059
Abundance_shortBRED_Location + Sample + TimepointINF_PCE	gi.AFU35066_1.ARO_3000275.linB__Staphylococcus_aureus_	0.389116	0.250435	0.0380126	0.626909	0.859534	0.169861
Abundance_shortBRED_Location + Sample + TimepointINF_PCE	gi.AGJ01153_1.ARO_3002326.KPC.16__Klebsiella_pneumoniae_	0.00801259	0.446152	0.271488	0.103136	0.967753	0.467452
Abundance_shortBRED_Location + Sample + TimepointINF_PCE	gi.AGV10818_1.ARO_3002669.APH.2__..Ig__Campylobacter_coli_CVM_N29710_	0.455701	0.0185564	0.10508	0.681202	0.717237	0.286695
Abundance_shortBRED_Location + Sample + TimepointINF_PCE	gi.AGV10830_1.ARO_3002647.APH.3_..IIIa__Campylobacter_coli_CVM_N29710_	0.875732	0.293419	0.279615	0.939765	0.859534	0.471443
Abundance_shortBRED_Location + Sample + TimepointINF_PCE	gi.AHA11125_1.ARO_3001549.OXA.362__Acinetobacter_lwoffii_	0.408335	0.919795	0.777635	0.643572	0.967753	0.81708
Abundance_shortBRED_Location + Sample + TimepointINF_PCE	gi.AHA41505_1.ARO_3002930.vanRO__Rhodococcus_equi_	0.107482	0.158473	0.0154127	0.334572	0.792366	0.14899
Abundance_shortBRED_Location + Sample + TimepointINF_PCE	gi.AHW42429_1.ARO_3002858.dfrA12__Klebsiella_pneumoniae_subsp__pneumoniae_	0.0454942	0.508076	0.387438	0.246517	0.967753	0.550769
Abundance_shortBRED_Location + Sample + TimepointINF_PCE	gi.AIJ27543_1.ARO_3002629.ANT.6..Ib__Campylobacter_jejuni_	0.203285	0.809149	0.28863	0.446612	0.967753	0.48105
Abundance_shortBRED_Location + Sample + TimepointINF_PCE	gi.AJA36815_1.ARO_3003193.QnrVC7__Vibrio_cholerae_	0.00117418	0.846095	0.0358583	0.0567518	0.967753	0.169861
Abundance_shortBRED_Location + Sample + TimepointINF_PCE	gi.AJE60855_1.ARO_3003209.FosA5__Escherichia_coli_	0.666852	0.858448	0.550734	0.826248	0.967753	0.638851
Abundance_shortBRED_Location + Sample + TimepointINF_PCE	gi.ANK04027_1.ARO_3003838.gadW__Escherichia_coli_O25b_H4_	0.34284	0.0976435	0.664052	0.5714	0.792366	0.718564
Abundance_shortBRED_Location + Sample + TimepointINF_PCE	gi.BAA11236_1.ARO_3000206.emrK__Escherichia_coli_	0.441306	0.939483	0.0426493	0.666556	0.967753	0.172613
Abundance_shortBRED_Location + Sample + TimepointINF_PCE	gi.BAA11237_1.ARO_3000254.emrY__Escherichia_coli_	0.264444	0.443899	0.270418	0.495804	0.967753	0.467452
Abundance_shortBRED_Location + Sample + TimepointINF_PCE	gi.BAB72158_1.ARO_3002020.CMY.9__Escherichia_coli_	0.703349	0.374892	0.560578	0.842856	0.93723	0.639214
Abundance_shortBRED_Location + Sample + TimepointINF_PCE	gi.BAD00739_1.ARO_3002607.aadA7__Vibrio_fluvialis_	0.688156	0.24653	0.436485	0.838509	0.859534	0.568196
Abundance_shortBRED_Location + Sample + TimepointINF_PCE	gi.BAD95494_1.ARO_3002895.sat.1__Escherichia_coli_	0.506078	0.242068	0.546205	0.719424	0.859534	0.638707
Abundance_shortBRED_Location + Sample + TimepointINF_PCE	gi.BAE77781_1.ARO_3000795.mdtE__Escherichia_coli_str__K.12_substr__W3110_	0.124824	0.819968	0.192691	0.354892	0.967753	0.394134
Abundance_shortBRED_Location + Sample + TimepointINF_PCE	gi.BAE77933_1.ARO_3000518.CRP__Escherichia_coli_str__K.12_substr__W3110_	0.0106692	0.140629	0.00304995	0.103136	0.792366	0.134833
Abundance_shortBRED_Location + Sample + TimepointINF_PCE	gi.BAE78082_1.ARO_3003550.mdtP__Escherichia_coli_str__K.12_substr__W3110_	0.748494	0.451238	0.475121	0.85458	0.967753	0.588826
Abundance_shortBRED_Location + Sample + TimepointINF_PCE	gi.BAE78083_1.ARO_3003549.mdtO__Escherichia_coli_str__K.12_substr__W3110_	0.185806	0.597818	0.195708	0.417331	0.967753	0.394134
Abundance_shortBRED_Location + Sample + TimepointINF_PCE	gi.BAE78084_1.ARO_3003548.mdtN__Escherichia_coli_str__K.12_substr__W3110_	0.168577	0.0417035	0.0244936	0.416167	0.767186	0.154416
Abundance_shortBRED_Location + Sample + TimepointINF_PCE	gi.BAE78116_1.ARO_3003576.PmrC__Escherichia_coli_str__K.12_substr__W3110_	0.746678	0.191752	0.330401	0.85458	0.859534	0.50966
Abundance_shortBRED_Location + Sample + TimepointINF_PCE	gi.BAL43359.ARO_3003742.mphG__Photobacterium_damselae_subsp__damselae_	0.971576	0.981459	0.176109	0.978323	0.988274	0.381132
Abundance_shortBRED_Location + Sample + TimepointINF_PCE	gi.BAL43360.ARO_3003745.mefC__Photobacterium_damselae_subsp__damselae_	0.850038	0.550811	0.021115	0.939765	0.967753	0.152051
Abundance_shortBRED_Location + Sample + TimepointINF_PCE	gi.CAA28209_1.ARO_3000230.ANT.2__..Ia__uncultured_bacterium_	0.0055452	0.267358	0.429605	0.103136	0.859534	0.568196
Abundance_shortBRED_Location + Sample + TimepointINF_PCE	gi.CAA33795_1.ARO_3003563.NPS_beta.lactamase__Rhodobacter_capsulatus_	0.493035	0.344057	0.557461	0.714462	0.93723	0.639214
Abundance_shortBRED_Location + Sample + TimepointINF_PCE	gi.CAA40146_1.ARO_3002997.LCR.1__Pseudomonas_aeruginosa_	0.700019	0.939722	0.0195373	0.842856	0.967753	0.152051
Abundance_shortBRED_Location + Sample + TimepointINF_PCE	gi.CAA52904_1.ARO_3002688.catS__Streptococcus_pyogenes_	0.162168	0.995034	0.41524	0.412533	0.995034	0.568196
Abundance_shortBRED_Location + Sample + TimepointINF_PCE	gi.CAA57832_1.ARO_3002670.cat__Morganella_morganii_	0.00415085	0.669243	0.160254	0.103136	0.967753	0.363075
Abundance_shortBRED_Location + Sample + TimepointINF_PCE	gi.CAA71441_1.ARO_3003095.imiS__Aeromonas_veronii_	0.277321	0.279099	0.426386	0.501911	0.859534	0.568196
Abundance_shortBRED_Location + Sample + TimepointINF_PCE	gi.CAA79727_1.ARO_3000191.tetQ__Bacteroides_fragilis_	0.260787	0.92627	0.317592	0.495804	0.967753	0.50966
Abundance_shortBRED_Location + Sample + TimepointINF_PCE	gi.CAA86211_1.ARO_3003833.fyuA__Escherichia_coli_	0.108427	0.130715	0.0376797	0.334572	0.792366	0.169861
Abundance_shortBRED_Location + Sample + TimepointINF_PCE	gi.CAB89086_1.ARO_3002158.FOX.4__Escherichia_coli_	0.00628279	0.280162	0.00805675	0.103136	0.859534	0.134833
Abundance_shortBRED_Location + Sample + TimepointINF_PCE	gi.CAC41371_1.ARO_3000196.tet32__Clostridiaceae_bacterium_K10_	0.335552	0.258897	0.56868	0.565757	0.859534	0.639214
Abundance_shortBRED_Location + Sample + TimepointINF_PCE	gi.CAC81324_1.ARO_3003015.dfrA19__Salmonella_enterica_subsp__enterica_serovar_Typhimurium_	0.00929797	0.355801	0.369408	0.103136	0.93723	0.541052
Abundance_shortBRED_Location + Sample + TimepointINF_PCE	gi.CAC85660_1.ARO_3000960.TEM.93__Escherichia_coli_	0.00715155	0.703682	0.19482	0.103136	0.967753	0.394134
Abundance_shortBRED_Location + Sample + TimepointINF_PCE	gi.CAD55718_1.ARO_3000197.tet36__Bacteroides_coprosuis_DSM_18011_	0.174947	0.82159	0.157699	0.416167	0.967753	0.363075
Abundance_shortBRED_Location + Sample + TimepointINF_PCE	gi.CAE51745_1.ARO_3000168.tetD__Serratia_marcescens_	0.87874	0.289709	0.49625	0.939765	0.859534	0.604674
Abundance_shortBRED_Location + Sample + TimepointINF_PCE	gi.CAG27791_1.ARO_3000316.mphA__uncultured_bacterium_	0.0510036	0.0318315	0.21906	0.246517	0.767186	0.402072
Abundance_shortBRED_Location + Sample + TimepointINF_PCE	gi.CAJ19599_1.ARO_3002420.OKP.A.3__Klebsiella_pneumoniae_	0.222749	0.203573	0.00656466	0.455777	0.859534	0.134833
Abundance_shortBRED_Location + Sample + TimepointINF_PCE	gi.CAP69660_1.ARO_3001811.OXA.129__Salmonella_enterica_subsp__enterica_serovar_Bredeney_	0.922386	0.505587	0.149626	0.961472	0.967753	0.363075
Abundance_shortBRED_Location + Sample + TimepointINF_PCE	gi.CAQ03505_1.ARO_3001338.SHV.100__Klebsiella_pneumoniae_	0.428977	0.627668	0.0528513	0.661721	0.967753	0.186913
Abundance_shortBRED_Location + Sample + TimepointINF_PCE	gi.EFF04178_1.ARO_3000309.emrD__Escherichia_coli_B185_	0.0398715	0.504491	0.0698569	0.231703	0.967753	0.224855
Abundance_shortBRED_Location + Sample + TimepointINF_PCE	gi.NP_309766_1.ARO_3000676.H.NS__Escherichia_coli_O157_H7_str__Sakai_	0.266708	0.669092	0.424091	0.495804	0.967753	0.568196
Abundance_shortBRED_Location + Sample + TimepointINF_PCE	gi.NP_312864_1.ARO_3000830.cpxA__Escherichia_coli_O157_H7_str__Sakai_	0.0814334	0.531955	0.0988302	0.313333	0.967753	0.279086
Abundance_shortBRED_Location + Sample + TimepointINF_PCE	gi.NP_312865_1.ARO_3000831.cpxR__Escherichia_coli_O157_H7_str__Sakai_	0.887916	0.770261	0.0386579	0.939765	0.967753	0.169861
Abundance_shortBRED_Location + Sample + TimepointINF_PCE	gi.NP_414618_4.ARO_3003843.leuO__Escherichia_coli_str__K.12_substr__MG1655_	0.433924	0.100477	0.153317	0.662305	0.792366	0.363075
Abundance_shortBRED_Location + Sample + TimepointINF_PCE	gi.NP_414996_1.ARO_3000207.acrA__Escherichia_coli_str__K.12_substr__MG1655_	0.000311397	0.0100986	0.00836895	0.0225762	0.717237	0.134833
Abundance_shortBRED_Location + Sample + TimepointINF_PCE	gi.NP_415632_1.ARO_3003844.mfd__Escherichia_coli_str__K.12_substr__MG1655_	0.611852	0.956403	0.816123	0.799267	0.969779	0.845271
Abundance_shortBRED_Location + Sample + TimepointINF_PCE	gi.NP_415791_1.ARO_3003840.aminocoumarin_resistant_cysB__Escherichia_coli_str__K.12_substr__MG1655_	0.837162	0.945725	0.382909	0.939765	0.967753	0.549721
Abundance_shortBRED_Location + Sample + TimepointINF_PCE	gi.NP_417169_1.ARO_3000516.emrR__Escherichia_coli_str__K.12_substr__MG1655_	0.608434	0.404882	0.014528	0.799267	0.96755	0.14899
Abundance_shortBRED_Location + Sample + TimepointINF_PCE	gi.NP_417177_1.ARO_3003830.aminocoumarin_resistant_alaS__Escherichia_coli_str__K.12_substr__MG1655_	0.462138	0.804623	0.169392	0.683776	0.967753	0.37215
Abundance_shortBRED_Location + Sample + TimepointINF_PCE	gi.NP_417969_1.ARO_3003834.gadE__Escherichia_coli_str__K.12_substr__MG1655_	0.237192	0.91087	0.270423	0.471136	0.967753	0.467452
Abundance_shortBRED_Location + Sample + TimepointINF_PCE	gi.NP_418540_1.ARO_3003828.adiY__Escherichia_coli_str__K.12_substr__MG1655_	0.0692679	0.926201	0.0221168	0.313333	0.967753	0.152051
Abundance_shortBRED_Location + Sample + TimepointINF_PCE	gi.WP_042649345.ARO_3002191.MOX.9__Gammaproteobacteria_	0.00625483	0.407038	0.0752222	0.103136	0.96755	0.232069
Abundance_shortBRED_Location + Sample + TimepointINF_PCE	gi.YP_001707639_1.ARO_3000814.mexT__Acinetobacter_baumannii_SDF_	0.575747	0.792175	0.186301	0.780218	0.967753	0.391503
Abundance_shortBRED_Location + Sample + TimepointINF_PCE	gi.YP_002743273_1.ARO_3000616.mel__Streptococcus_pneumoniae_Taiwan19F.14_	0.420877	0.0197858	0.0130852	0.656207	0.717237	0.14595
Abundance_shortBRED_Location + Sample + TimepointINF_PCE	gi.YP_003971446.ARO_3003730.Bifidobacteria_intrinsic_ileS_conferring_resistance_to_mupirocin__Bifidobacterium_bifidum_PRL2010_	0.958937	0.907113	0.45896	0.978323	0.967753	0.577514
Abundance_shortBRED_Location + Sample + TimepointINF_PCE	gi.YP_006142099_1.ARO_3002601.aadA__Escherichia_coli_UMNK88_	0.824805	0.332416	0.672471	0.934349	0.926928	0.722284
Abundance_shortBRED_Location + Sample + TimepointINF_PCE	gi.YP_008997285_1.ARO_3000615.mefA__Exiguobacterium_sp__S3.2_	0.0811057	0.155694	0.217165	0.313333	0.792366	0.402072
Abundance_shortBRED_Location + Sample + TimepointINF_PCE	gi.YP_009081591_1.ARO_3002613.aadA13__Pseudomonas_aeruginosa_	0.958794	0.0696757	0.875852	0.978323	0.792366	0.888102
Abundance_shortBRED_Location + Sample + TimepointINF_PCE	gi.YP_489321_1.ARO_3001329.mdtG__Escherichia_coli_str__K.12_substr__W3110_	0.594583	0.737557	0.0821664	0.792893	0.967753	0.243291
Abundance_shortBRED_Location + Sample + TimepointINF_PCE	gi.YP_489794_1.ARO_3000263.marA__Escherichia_coli_str__K.12_substr__W3110_	0.0779194	0.103176	0.636792	0.313333	0.792366	0.694247
Abundance_shortBRED_Location + Sample + TimepointINF_PCE	gi.YP_490321_1.ARO_3000828.baeR__Escherichia_coli_str__K.12_substr__W3110_	0.0821149	0.681922	0.0225367	0.313333	0.967753	0.152051
Abundance_shortBRED_Location + Sample + TimepointINF_PCE	gi.YP_491919_1.ARO_3000508.gadX__Escherichia_coli_str__K.12_substr__W3110_	0.223023	0.260632	0.404897	0.455777	0.859534	0.568196
Abundance_shortBRED_Location + Sample + TimepointINF_PCE	gi.YP_492255_1.ARO_3003583.PmrB__Escherichia_coli_str__K.12_substr__W3110_	0.15369	0.762341	0.0602776	0.397948	0.967753	0.202716
Abundance_shortBRED_Location + Sample + TimepointINF_PCE	gi.YP_724476_1.ARO_3003109.msrE__Escherichia_coli_	0.182558	0.708917	0.0615137	0.417331	0.967753	0.202716
Test and Covariates Used	ShortBRED Gene and Organism	Location	Sample	Timepoint	adjusted_Location	adjusted_Sample	adjusted_Timepoint
Abundance_shortBRED_Location + Sample + TimepointPCE_ATE	SHV_38	0.11447	0.108783	0.322039	0.433352	0.116475	0.724731
Abundance_shortBRED_Location + Sample + TimepointPCE_ATE	gi.AAA22419_1.ARO_3000522.ErmG__Lysinibacillus_sphaericus_	0.990648	0.00574901	0.144957	0.990648	0.0105068	0.724731
Abundance_shortBRED_Location + Sample + TimepointPCE_ATE	gi.AAA23033_1.ARO_3000190.tetO__Campylobacter_jejuni_	0.303834	0.000202757	0.594016	0.596683	0.00100741	0.790959
Abundance_shortBRED_Location + Sample + TimepointPCE_ATE	gi.AAA26779_1.ARO_3001303.ErmO__Streptomyces_lividans_	0.709791	0.000670899	0.085951	0.872728	0.00197542	0.724731
Abundance_shortBRED_Location + Sample + TimepointPCE_ATE	gi.AAA27431_1.ARO_3000498.ErmF__Bacteroides_fragilis_	0.313618	0.000341784	0.312807	0.596683	0.00144917	0.724731
Abundance_shortBRED_Location + Sample + TimepointPCE_ATE	gi.AAA27471_1.ARO_3000205.tetX__Bacteroides_fragilis_	0.703447	0.00220981	0.283526	0.872728	0.00509217	0.724731
Abundance_shortBRED_Location + Sample + TimepointPCE_ATE	gi.AAA71915_1.ARO_3000173.tetE__Escherichia_coli_	0.0734674	0.00426043	0.790811	0.373744	0.00903211	0.838259
Abundance_shortBRED_Location + Sample + TimepointPCE_ATE	gi.AAA88552_1.ARO_3002541.AAC.3..VIIa__Streptomyces_rimosus_	0.315489	0.000209086	0.144255	0.596683	0.00100741	0.724731
Abundance_shortBRED_Location + Sample + TimepointPCE_ATE	gi.AAC09015_1.ARO_3002481.AER.1__Aeromonas_hydrophila_	0.766684	0.0039085	0.129247	0.893061	0.00845513	0.724731
Abundance_shortBRED_Location + Sample + TimepointPCE_ATE	gi.AAC41449_1.ARO_3001398.OXA.3__Pseudomonas_aeruginosa_	0.261099	0.000568082	0.027068	0.596683	0.00189208	0.724731
Abundance_shortBRED_Location + Sample + TimepointPCE_ATE	gi.AAC45086_2.ARO_3001821.ACT.1__Klebsiella_pneumoniae_	0.206392	0.0291149	0.522459	0.560962	0.0434673	0.757815
Abundance_shortBRED_Location + Sample + TimepointPCE_ATE	gi.AAC45607_1.ARO_3000375.ErmB__Lactobacillus_fermentum_	0.337051	0.000196376	0.129575	0.607642	0.00100741	0.724731
Abundance_shortBRED_Location + Sample + TimepointPCE_ATE	gi.AAC75314_1.ARO_3003578.PmrF__Escherichia_coli_str__K.12_substr__MG1655_	0.146642	0.0325075	0.434792	0.480166	0.0459439	0.724731
Abundance_shortBRED_Location + Sample + TimepointPCE_ATE	gi.AAC75315_1.ARO_3002985.arnA__Escherichia_coli_str__K.12_substr__MG1655_	0.893579	0.00125839	0.337955	0.971288	0.00333474	0.724731
Abundance_shortBRED_Location + Sample + TimepointPCE_ATE	gi.AAC75429_1.ARO_3000833.evgS__Escherichia_coli_str__K.12_substr__MG1655_	0.95647	0.00873668	0.099944	0.981432	0.0149369	0.724731
Abundance_shortBRED_Location + Sample + TimepointPCE_ATE	gi.AAC75733_1.ARO_3000074.emrB__Escherichia_coli_str__K.12_substr__MG1655_	0.0775696	0.00559838	0.46248	0.373744	0.010411	0.724731
Abundance_shortBRED_Location + Sample + TimepointPCE_ATE	gi.AAC76297_1.ARO_3000499.acrE__Escherichia_coli_str__K.12_substr__MG1655_	0.386032	0.0483706	0.529041	0.629529	0.064091	0.757815
Abundance_shortBRED_Location + Sample + TimepointPCE_ATE	gi.AAC76298_1.ARO_3000502.acrF__Escherichia_coli_str__K.12_substr__MG1655_	0.0747237	0.00193881	0.856069	0.373744	0.00477939	0.898448
Abundance_shortBRED_Location + Sample + TimepointPCE_ATE	gi.AAC76539_1.ARO_3000796.mdtF__Escherichia_coli_str__K.12_substr__MG1655_	0.645326	0.0590593	0.0905014	0.834202	0.076345	0.724731
Abundance_shortBRED_Location + Sample + TimepointPCE_ATE	gi.AAC77293_1.ARO_3001214.mdtM__Escherichia_coli_str__K.12_substr__MG1655_	0.565853	0.0602577	0.924919	0.789216	0.0769556	0.934278
Abundance_shortBRED_Location + Sample + TimepointPCE_ATE	gi.AAC78336_1.ARO_3002826.EreA2__Providencia_stuartii_	0.309157	0.00100016	0.0414822	0.596683	0.0028247	0.724731
Abundance_shortBRED_Location + Sample + TimepointPCE_ATE	gi.AAD01868_1.ARO_3002867.dfrF__Enterococcus_faecalis_	0.237304	0.000395171	0.447327	0.593642	0.00155141	0.724731
Abundance_shortBRED_Location + Sample + TimepointPCE_ATE	gi.AAF04388_1.ARO_3001871.CTX.M.8__Citrobacter_amalonaticus_	0.357631	0.000569457	0.0750154	0.614394	0.00189208	0.724731
Abundance_shortBRED_Location + Sample + TimepointPCE_ATE	gi.AAF17880_1.ARO_3002605.aadA5__Escherichia_coli_	0.788289	0.246392	0.479854	0.901535	0.256054	0.726637
Abundance_shortBRED_Location + Sample + TimepointPCE_ATE	gi.AAF27726_1.ARO_3002694.cmlA4__Klebsiella_pneumoniae_	0.029716	0.0059014	0.989881	0.358255	0.0106025	0.989881
Abundance_shortBRED_Location + Sample + TimepointPCE_ATE	gi.AAK55330_1.ARO_3001768.OXA.118__Burkholderia_cepacia_	0.373487	0.0376767	0.143579	0.622335	0.0518666	0.724731
Abundance_shortBRED_Location + Sample + TimepointPCE_ATE	gi.AAL51021_2.ARO_3002598.ANT.3__..Ii.AAC.6_..IId_fusion_protein__Serratia_marcescens_	0.0381588	0.000589043	0.774255	0.358255	0.00189208	0.838259
Abundance_shortBRED_Location + Sample + TimepointPCE_ATE	gi.AAL59753_1.ARO_3000412.sul2__Vibrio_cholerae_	0.157601	0.0958586	0.369915	0.480166	0.103684	0.724731
Abundance_shortBRED_Location + Sample + TimepointPCE_ATE	gi.AAO16462_1.ARO_3000167.tetC__uncultured_bacterium_	0.00473098	7.38e-08	0.239785	0.358255	7.82e-06	0.724731
Abundance_shortBRED_Location + Sample + TimepointPCE_ATE	gi.AAS13767_1.ARO_3003839.Mrx__Aeromonas_hydrophila_	0.37575	0.00449293	0.327029	0.622335	0.00933825	0.724731
Abundance_shortBRED_Location + Sample + TimepointPCE_ATE	gi.AAW66497_1.ARO_3000566.tet39__Acinetobacter_sp__LUH5605_	0.087627	0.000174223	0.383362	0.403846	0.000971979	0.724731
Abundance_shortBRED_Location + Sample + TimepointPCE_ATE	gi.AAY32951_1.ARO_3002837.lnuC__Streptococcus_agalactiae_	0.902569	0.00537504	0.367196	0.971288	0.0103592	0.724731
Abundance_shortBRED_Location + Sample + TimepointPCE_ATE	gi.AAY43207_1.ARO_3002338.GES.9__Pseudomonas_aeruginosa_	0.0405572	0.00557909	0.618968	0.358255	0.010411	0.805456
Abundance_shortBRED_Location + Sample + TimepointPCE_ATE	gi.AAZ42322_1.ARO_3003836.qacH__Vibrio_cholerae_	0.937521	0.00175939	0.0420728	0.981432	0.00453891	0.724731
Abundance_shortBRED_Location + Sample + TimepointPCE_ATE	gi.ABD58917_1.ARO_3002615.aadA15__Pseudomonas_aeruginosa_	0.100669	0.00065354	0.397787	0.410304	0.00197542	0.724731
Abundance_shortBRED_Location + Sample + TimepointPCE_ATE	gi.ABF47470_1.ARO_3002791.QnrS2__Salmonella_enterica_subsp__enterica_serovar_Anatum_	0.104511	0.000156419	0.470612	0.410304	0.000957213	0.724731
Abundance_shortBRED_Location + Sample + TimepointPCE_ATE	gi.ABF47919_1.ARO_3001631.OXA.96__Acinetobacter_baumannii_	0.204128	0.021346	0.566864	0.560962	0.0327924	0.780359
Abundance_shortBRED_Location + Sample + TimepointPCE_ATE	gi.ABK33456_1.ARO_3002639.APH.3__..Ib__Pseudomonas_aeruginosa_	0.0266822	5.35e-06	0.214319	0.358255	0.000141863	0.724731
Abundance_shortBRED_Location + Sample + TimepointPCE_ATE	gi.ACA23185_1.ARO_3000194.tetW__Bifidobacterium_longum_	0.252018	4.5e-05	0.51118	0.593642	0.000397416	0.752571
Abundance_shortBRED_Location + Sample + TimepointPCE_ATE	gi.ACI32877_1.ARO_3002859.dfrA14__Escherichia_coli_	0.101082	0.000579552	0.291693	0.410304	0.00189208	0.724731
Abundance_shortBRED_Location + Sample + TimepointPCE_ATE	gi.ACJ63262_1.ARO_3003107.mefB__Escherichia_coli_	0.907146	0.00179843	0.213938	0.971288	0.00453891	0.724731
Abundance_shortBRED_Location + Sample + TimepointPCE_ATE	gi.ACO72579_1.ARO_3001801.OXA.147__Pseudomonas_aeruginosa_	0.139895	0.00331002	0.504198	0.480166	0.00730962	0.752571
Abundance_shortBRED_Location + Sample + TimepointPCE_ATE	gi.ACR57831_1.ARO_3003022.dfrB3__Klebsiella_oxytoca_	0.816484	0.0483393	0.374194	0.901535	0.064091	0.724731
Abundance_shortBRED_Location + Sample + TimepointPCE_ATE	gi.ACS44784_1.ARO_3002185.MOX.6__Aeromonas_caviae_	0.56233	0.000668946	0.670974	0.789216	0.00197542	0.82004
Abundance_shortBRED_Location + Sample + TimepointPCE_ATE	gi.ACT97371_1.ARO_3003097.CfxA6__uncultured_organism_	0.248943	0.000109676	0.0696711	0.593642	0.000830403	0.724731
Abundance_shortBRED_Location + Sample + TimepointPCE_ATE	gi.ACT97415_1.ARO_3002999.CblA.1__mixed_culture_bacterium_AX_gF3SD01_15_	0.279281	0.000144273	0.345181	0.596683	0.000955811	0.724731
Abundance_shortBRED_Location + Sample + TimepointPCE_ATE	gi.ADV91011_1.ARO_3000245.RbpA__Mycobacterium_smegmatis_str__MC2_155_	0.158545	0.0636366	0.721247	0.480166	0.0793586	0.837166
Abundance_shortBRED_Location + Sample + TimepointPCE_ATE	gi.AEJ33969_1.ARO_3000410.sul1__Vibrio_fluvialis_	0.0254976	0.293333	0.545513	0.358255	0.301877	0.770992
Abundance_shortBRED_Location + Sample + TimepointPCE_ATE	gi.AEL31272_1.ARO_3002756.QnrB41__Citrobacter_freundii_	0.0144955	0.0140789	0.643593	0.358255	0.0229594	0.812153
Abundance_shortBRED_Location + Sample + TimepointPCE_ATE	gi.AEQ38567_1.ARO_3002660.APH.6..Id__Escherichia_coli_	0.0625239	2.97e-05	0.777793	0.368196	0.000397416	0.838259
Abundance_shortBRED_Location + Sample + TimepointPCE_ATE	gi.AEV91550_1.ARO_3001710.OXA.211__Acinetobacter_johnsonii_	0.050134	3.29e-05	0.762087	0.368196	0.000397416	0.838259
Abundance_shortBRED_Location + Sample + TimepointPCE_ATE	gi.AFK13827_1.ARO_3000825.robA__Enterobacter_cloacae_	0.175235	0.0170319	0.243933	0.514298	0.0273543	0.724731
Abundance_shortBRED_Location + Sample + TimepointPCE_ATE	gi.AFK13828_1.ARO_3000823.ramA__Enterobacter_cloacae_	0.276345	0.0874765	0.246959	0.596683	0.0986437	0.724731
Abundance_shortBRED_Location + Sample + TimepointPCE_ATE	gi.AFK31666_1.ARO_3000567.tet40__Streptococcus_suis_	0.41315	0.000129933	0.290882	0.644029	0.000918194	0.724731
Abundance_shortBRED_Location + Sample + TimepointPCE_ATE	gi.AFU35065_1.ARO_3003206.lsaE__Staphylococcus_aureus_	0.600318	0.0677687	0.665085	0.804542	0.082125	0.82004
Abundance_shortBRED_Location + Sample + TimepointPCE_ATE	gi.AGJ01153_1.ARO_3002326.KPC.16__Klebsiella_pneumoniae_	0.0579635	0.0579635	0.628389	0.368196	0.0758535	0.805456
Abundance_shortBRED_Location + Sample + TimepointPCE_ATE	gi.AGV10830_1.ARO_3002647.APH.3_..IIIa__Campylobacter_coli_CVM_N29710_	0.95001	0.00101263	0.423129	0.981432	0.0028247	0.724731
Abundance_shortBRED_Location + Sample + TimepointPCE_ATE	gi.AHA11125_1.ARO_3001549.OXA.362__Acinetobacter_lwoffii_	0.734588	0.0630082	0.925464	0.874903	0.0793586	0.934278
Abundance_shortBRED_Location + Sample + TimepointPCE_ATE	gi.AHA41505_1.ARO_3002930.vanRO__Rhodococcus_equi_	0.509021	0.0894565	0.393575	0.749392	0.0998146	0.724731
Abundance_shortBRED_Location + Sample + TimepointPCE_ATE	gi.AIJ27543_1.ARO_3002629.ANT.6..Ib__Campylobacter_jejuni_	0.678148	0.00203008	0.590019	0.855758	0.00478198	0.790959
Abundance_shortBRED_Location + Sample + TimepointPCE_ATE	gi.AJA36815_1.ARO_3003193.QnrVC7__Vibrio_cholerae_	0.0522143	0.0361574	0.726597	0.368196	0.0504301	0.837166
Abundance_shortBRED_Location + Sample + TimepointPCE_ATE	gi.AJE60855_1.ARO_3003209.FosA5__Escherichia_coli_	0.730951	0.0817677	0.452151	0.874903	0.0942106	0.724731
Abundance_shortBRED_Location + Sample + TimepointPCE_ATE	gi.ANK04027_1.ARO_3003838.gadW__Escherichia_coli_O25b_H4_	0.962914	0.00684263	0.563371	0.981432	0.0120887	0.780359
Abundance_shortBRED_Location + Sample + TimepointPCE_ATE	gi.BAA11236_1.ARO_3000206.emrK__Escherichia_coli_	0.669543	0.0249491	0.469371	0.855079	0.0377801	0.724731
Abundance_shortBRED_Location + Sample + TimepointPCE_ATE	gi.BAD00739_1.ARO_3002607.aadA7__Vibrio_fluvialis_	0.973333	0.076969	0.286162	0.982603	0.0896562	0.724731
Abundance_shortBRED_Location + Sample + TimepointPCE_ATE	gi.BAD95494_1.ARO_3002895.sat.1__Escherichia_coli_	0.179519	0.176791	0.137017	0.514298	0.185543	0.724731
Abundance_shortBRED_Location + Sample + TimepointPCE_ATE	gi.BAE77781_1.ARO_3000795.mdtE__Escherichia_coli_str__K.12_substr__W3110_	0.588318	0.0830262	0.435906	0.801232	0.094632	0.724731
Abundance_shortBRED_Location + Sample + TimepointPCE_ATE	gi.BAE77933_1.ARO_3000518.CRP__Escherichia_coli_str__K.12_substr__W3110_	0.303776	0.00232102	0.375142	0.596683	0.00523464	0.724731
Abundance_shortBRED_Location + Sample + TimepointPCE_ATE	gi.BAE78082_1.ARO_3003550.mdtP__Escherichia_coli_str__K.12_substr__W3110_	0.283464	0.136464	0.358791	0.596683	0.144652	0.724731
Abundance_shortBRED_Location + Sample + TimepointPCE_ATE	gi.BAE78084_1.ARO_3003548.mdtN__Escherichia_coli_str__K.12_substr__W3110_	0.221712	0.00479651	0.0824756	0.587537	0.00977751	0.724731
Abundance_shortBRED_Location + Sample + TimepointPCE_ATE	gi.BAL43359.ARO_3003742.mphG__Photobacterium_damselae_subsp__damselae_	0.805732	1.82e-06	0.315031	0.901535	9.67e-05	0.724731
Abundance_shortBRED_Location + Sample + TimepointPCE_ATE	gi.BAL43360.ARO_3003745.mefC__Photobacterium_damselae_subsp__damselae_	0.716295	4.93e-06	0.163745	0.872728	0.000141863	0.724731
Abundance_shortBRED_Location + Sample + TimepointPCE_ATE	gi.CAA28209_1.ARO_3000230.ANT.2__..Ia__uncultured_bacterium_	0.0341794	0.000162546	0.778191	0.358255	0.000957213	0.838259
Abundance_shortBRED_Location + Sample + TimepointPCE_ATE	gi.CAA52904_1.ARO_3002688.catS__Streptococcus_pyogenes_	0.318608	0.0203367	0.227422	0.596683	0.0317012	0.724731
Abundance_shortBRED_Location + Sample + TimepointPCE_ATE	gi.CAA57832_1.ARO_3002670.cat__Morganella_morganii_	0.0181405	0.465003	0.687265	0.358255	0.473945	0.827842
Abundance_shortBRED_Location + Sample + TimepointPCE_ATE	gi.CAA71441_1.ARO_3003095.imiS__Aeromonas_veronii_	0.251873	0.00532736	0.71778	0.593642	0.0103592	0.837166
Abundance_shortBRED_Location + Sample + TimepointPCE_ATE	gi.CAA79727_1.ARO_3000191.tetQ__Bacteroides_fragilis_	0.356104	0.00489225	0.630687	0.614394	0.00978449	0.805456
Abundance_shortBRED_Location + Sample + TimepointPCE_ATE	gi.CAB89086_1.ARO_3002158.FOX.4__Escherichia_coli_	0.0620852	0.00996313	0.23102	0.368196	0.0167634	0.724731
Abundance_shortBRED_Location + Sample + TimepointPCE_ATE	gi.CAC41371_1.ARO_3000196.tet32__Clostridiaceae_bacterium_K10_	0.444439	0.0682155	0.448189	0.673008	0.082125	0.724731
Abundance_shortBRED_Location + Sample + TimepointPCE_ATE	gi.CAC85660_1.ARO_3000960.TEM.93__Escherichia_coli_	0.0227442	0.000105797	0.59695	0.358255	0.000830403	0.790959
Abundance_shortBRED_Location + Sample + TimepointPCE_ATE	gi.CAE51745_1.ARO_3000168.tetD__Serratia_marcescens_	0.396411	0.0652336	0.673051	0.634916	0.0804042	0.82004
Abundance_shortBRED_Location + Sample + TimepointPCE_ATE	gi.CAG27791_1.ARO_3000316.mphA__uncultured_bacterium_	0.799023	0.727176	0.248779	0.901535	0.734101	0.724731
Abundance_shortBRED_Location + Sample + TimepointPCE_ATE	gi.CAP69660_1.ARO_3001811.OXA.129__Salmonella_enterica_subsp__enterica_serovar_Bredeney_	0.320858	3.89e-05	0.876018	0.596683	0.000397416	0.901533
Abundance_shortBRED_Location + Sample + TimepointPCE_ATE	gi.CAQ03505_1.ARO_3001338.SHV.100__Klebsiella_pneumoniae_	0.607202	0.068954	0.107966	0.804542	0.082125	0.724731
Abundance_shortBRED_Location + Sample + TimepointPCE_ATE	gi.CCP46065_1.ARO_3000816.mtrA__Mycobacterium_tuberculosis_H37Rv_	0.750152	0.0311824	0.775861	0.883513	0.0451246	0.838259
Abundance_shortBRED_Location + Sample + TimepointPCE_ATE	gi.NP_309766_1.ARO_3000676.H.NS__Escherichia_coli_O157_H7_str__Sakai_	0.299843	0.0188408	0.212553	0.596683	0.0298079	0.724731
Abundance_shortBRED_Location + Sample + TimepointPCE_ATE	gi.NP_312864_1.ARO_3000830.cpxA__Escherichia_coli_O157_H7_str__Sakai_	0.156957	0.00198956	0.286864	0.480166	0.00478198	0.724731
Abundance_shortBRED_Location + Sample + TimepointPCE_ATE	gi.NP_414996_1.ARO_3000207.acrA__Escherichia_coli_str__K.12_substr__MG1655_	0.0466254	0.000322016	0.471759	0.368196	0.00142224	0.724731
Abundance_shortBRED_Location + Sample + TimepointPCE_ATE	gi.NP_415632_1.ARO_3003844.mfd__Escherichia_coli_str__K.12_substr__MG1655_	0.961274	0.0937436	0.790664	0.981432	0.102441	0.838259
Abundance_shortBRED_Location + Sample + TimepointPCE_ATE	gi.NP_415791_1.ARO_3003840.aminocoumarin_resistant_cysB__Escherichia_coli_str__K.12_substr__MG1655_	0.808702	0.030781	0.256624	0.901535	0.0451246	0.724731
Abundance_shortBRED_Location + Sample + TimepointPCE_ATE	gi.NP_417169_1.ARO_3000516.emrR__Escherichia_coli_str__K.12_substr__MG1655_	0.589586	3.57e-05	0.106231	0.801232	0.000397416	0.724731
Abundance_shortBRED_Location + Sample + TimepointPCE_ATE	gi.NP_417177_1.ARO_3003830.aminocoumarin_resistant_alaS__Escherichia_coli_str__K.12_substr__MG1655_	0.623234	0.0315021	0.190968	0.81559	0.0451246	0.724731
Abundance_shortBRED_Location + Sample + TimepointPCE_ATE	gi.NP_417969_1.ARO_3003834.gadE__Escherichia_coli_str__K.12_substr__MG1655_	0.401315	0.0118729	0.445255	0.634916	0.0196645	0.724731
Abundance_shortBRED_Location + Sample + TimepointPCE_ATE	gi.NP_418540_1.ARO_3003828.adiY__Escherichia_coli_str__K.12_substr__MG1655_	0.092935	0.041559	0.404641	0.410304	0.0564776	0.724731
Abundance_shortBRED_Location + Sample + TimepointPCE_ATE	gi.WP_042649345.ARO_3002191.MOX.9__Gammaproteobacteria_	0.0736186	0.0702102	0.416979	0.373744	0.082692	0.724731
Abundance_shortBRED_Location + Sample + TimepointPCE_ATE	gi.YP_001707639_1.ARO_3000814.mexT__Acinetobacter_baumannii_SDF_	0.119222	0.000381623	0.189322	0.435776	0.00155141	0.724731
Abundance_shortBRED_Location + Sample + TimepointPCE_ATE	gi.YP_002743273_1.ARO_3000616.mel__Streptococcus_pneumoniae_Taiwan19F.14_	0.538143	0.000433049	0.0703901	0.770853	0.0016394	0.724731
Abundance_shortBRED_Location + Sample + TimepointPCE_ATE	gi.YP_006142099_1.ARO_3002601.aadA__Escherichia_coli_UMNK88_	0.359363	0.00706738	0.735333	0.614394	0.012281	0.838122
Abundance_shortBRED_Location + Sample + TimepointPCE_ATE	gi.YP_008997285_1.ARO_3000615.mefA__Exiguobacterium_sp__S3.2_	0.0114701	3.1e-05	0.871426	0.358255	0.000397416	0.901533
Abundance_shortBRED_Location + Sample + TimepointPCE_ATE	gi.YP_009081591_1.ARO_3002613.aadA13__Pseudomonas_aeruginosa_	0.482282	4.41e-05	0.709576	0.720026	0.000397416	0.837166
Abundance_shortBRED_Location + Sample + TimepointPCE_ATE	gi.YP_489321_1.ARO_3001329.mdtG__Escherichia_coli_str__K.12_substr__W3110_	0.338216	0.00118742	0.311931	0.607642	0.00322735	0.724731
Abundance_shortBRED_Location + Sample + TimepointPCE_ATE	gi.YP_489794_1.ARO_3000263.marA__Escherichia_coli_str__K.12_substr__W3110_	0.522075	0.000231198	0.115267	0.758081	0.00106552	0.724731
Abundance_shortBRED_Location + Sample + TimepointPCE_ATE	gi.YP_490321_1.ARO_3000828.baeR__Escherichia_coli_str__K.12_substr__W3110_	0.141859	0.000449828	0.221932	0.480166	0.0016442	0.724731
Abundance_shortBRED_Location + Sample + TimepointPCE_ATE	gi.YP_491919_1.ARO_3000508.gadX__Escherichia_coli_str__K.12_substr__W3110_	0.430331	0.904384	0.408641	0.661088	0.904384	0.724731
Abundance_shortBRED_Location + Sample + TimepointPCE_ATE	gi.YP_492255_1.ARO_3003583.PmrB__Escherichia_coli_str__K.12_substr__W3110_	0.249894	0.0911195	0.372565	0.593642	0.100611	0.724731
Abundance_shortBRED_Location + Sample + TimepointPCE_ATE	gi.YP_724476_1.ARO_3003109.msrE__Escherichia_coli_	0.0327363	1.13e-05	0.417464	0.358255	0.000239331	0.724731
Test and Covariates Used	ShortBRED Gene and Organism	Location	Sample	Timepoint	adjusted_Location	adjusted_Sample	adjusted_Timepoint
Abundance_shortBRED_Location + Sample + TimepointUP_DOWN	SHV_38	0.0790359	0.0781661	0.114755	0.224101	0.156332	0.196887
Abundance_shortBRED_Location + Sample + TimepointUP_DOWN	gi.AAA26779_1.ARO_3001303.ErmO__Streptomyces_lividans_	0.0933756	0.00590059	0.0215965	0.224101	0.0440954	0.129579
Abundance_shortBRED_Location + Sample + TimepointUP_DOWN	gi.AAA88552_1.ARO_3002541.AAC.3..VIIa__Streptomyces_rimosus_	0.997732	0.556803	0.00131823	0.997732	0.596491	0.0158188
Abundance_shortBRED_Location + Sample + TimepointUP_DOWN	gi.AAC41449_1.ARO_3001398.OXA.3__Pseudomonas_aeruginosa_	0.0100493	0.00734924	0.204404	0.0602956	0.0440954	0.245285
Abundance_shortBRED_Location + Sample + TimepointUP_DOWN	gi.AAF04388_1.ARO_3001871.CTX.M.8__Citrobacter_amalonaticus_	0.00839461	0.0206796	0.0606167	0.0602956	0.0827185	0.196887
Abundance_shortBRED_Location + Sample + TimepointUP_DOWN	gi.AAZ42322_1.ARO_3003836.qacH__Vibrio_cholerae_	0.0446557	0.0309085	0.0927412	0.178623	0.0927255	0.196887
Abundance_shortBRED_Location + Sample + TimepointUP_DOWN	gi.ACR57831_1.ARO_3003022.dfrB3__Klebsiella_oxytoca_	0.989665	0.596491	0.595787	0.997732	0.596491	0.595787
Abundance_shortBRED_Location + Sample + TimepointUP_DOWN	gi.AEJ33969_1.ARO_3000410.sul1__Vibrio_fluvialis_	0.303225	0.4301	0.118456	0.4043	0.516121	0.196887
Abundance_shortBRED_Location + Sample + TimepointUP_DOWN	gi.AEQ38567_1.ARO_3002660.APH.6..Id__Escherichia_coli_	0.237592	0.0752439	0.117219	0.4043	0.156332	0.196887
Abundance_shortBRED_Location + Sample + TimepointUP_DOWN	gi.AHA41505_1.ARO_3002930.vanRO__Rhodococcus_equi_	0.293191	0.0972894	0.325195	0.4043	0.166782	0.354758
Abundance_shortBRED_Location + Sample + TimepointUP_DOWN	gi.CAG27791_1.ARO_3000316.mphA__uncultured_bacterium_	0.510888	0.112342	0.131258	0.613066	0.168513	0.196887
Abundance_shortBRED_Location + Sample + TimepointUP_DOWN	gi.YP_724476_1.ARO_3003109.msrE__Escherichia_coli_	0.234565	0.392737	0.176816	0.4043	0.516121	0.235755
Test and Covariates Used	ShortBRED Gene and Organism	Sample	adjusted_Sample
Abundance_shortBRED_SampleUP_RURAL	SHV_38	0.384861	0.767229
Abundance_shortBRED_SampleUP_RURAL	gi.AAA26779_1.ARO_3001303.ErmO__Streptomyces_lividans_	0.943215	0.943215
Abundance_shortBRED_SampleUP_RURAL	gi.AAA88552_1.ARO_3002541.AAC.3..VIIa__Streptomyces_rimosus_	0.0285206	0.0760549
Abundance_shortBRED_SampleUP_RURAL	gi.AAF04388_1.ARO_3001871.CTX.M.8__Citrobacter_amalonaticus_	0.0186083	0.0760549
Abundance_shortBRED_SampleUP_RURAL	gi.ACR57831_1.ARO_3003022.dfrB3__Klebsiella_oxytoca_	0.738188	0.943215
Abundance_shortBRED_SampleUP_RURAL	gi.AHA41505_1.ARO_3002930.vanRO__Rhodococcus_equi_	0.0248365	0.0760549
Abundance_shortBRED_SampleUP_RURAL	gi.BAE77933_1.ARO_3000518.CRP__Escherichia_coli_str__K.12_substr__W3110_	0.913587	0.943215
Abundance_shortBRED_SampleUP_RURAL	gi.YP_724476_1.ARO_3003109.msrE__Escherichia_coli_	0.479518	0.767229
