# Supplementary material for: Microbial Community Composition and Antibiotic Resistance Genes Within a North Carolina Urban Water System
Source: Preprints.org preprint supplement (doi:10.20944/preprints201809.0255.v1), 2018-09-14
Supplement: Supplementary file 1 [file supplementary › water_supp_info.pdf]

# Microbial Community Composition and Antibiotic Resistance Genes Within a North Carolina Urban Water System

*Kevin C. Lambirth<sup>1,2</sup>, Matthew C. B. Tsimigras<sup>1</sup>, Anju Lulla<sup>1</sup>, James Johnson<sup>1</sup>, Abrar Al-Shaer<sup>3</sup>, Orion Wynblatt<sup>1</sup>, Shannon Sypolt, Cory Brouwer<sup>1,2</sup>, Sandra Clinton<sup>1</sup>, Olya Keen<sup>1</sup>, Molly Redmond<sup>1</sup>, Anthony Fodor<sup>1</sup>, Cynthia Gibas<sup>1\*</sup>*

The University of North Carolina at Charlotte

9201 University City Boulevard, Charlotte NC, 28223<sup>1</sup>

150 N Research Campus Dr, Kannapolis NC, 28081<sup>2</sup>

The University of North Carolina at Chapel Hill

135 Dauer Drive, Chapel Hill NC, 27599<sup>3</sup>

## **Materials and Methods**

### Detection of antibiotic compounds using mass spectrometry

| UPLC                              |                                                                                                   |
|-----------------------------------|---------------------------------------------------------------------------------------------------|
| Column                            | ACQUITY UPLC BEH C18 1.7 $\mu$ m analytical column (2.1 $\times$ 100 mm)                          |
| Column Temp (°C)                  | 45 $\pm$ 0.5                                                                                      |
| Sample Manager Temp (°C)          | 4 $\pm$ 0.5                                                                                       |
| Gradient Conditions for ESI- mode | 0-0.25 min (2% B), 0.25-4 min (2-99% B), 4-6 min (99% B), 6-6.01 min (99-2% B), 6.01-7 min (2% B) |
| Flow Rate (mL/min)                | 0.4                                                                                               |
| Quattro Premier MS                |                                                                                                   |
| Capillary (kV)                    | 2.5                                                                                               |
| Sampling Cone (V)                 | 30                                                                                                |
| Extraction Cone (V)               | 4.0                                                                                               |
| Source Temp (°C)                  | 120                                                                                               |
| Desolvation Temp (°C)             | 350                                                                                               |
| Desolvation Gas Flow (L/Hr)       | 800                                                                                               |
| Cone Gas (L/Hr)                   | 0                                                                                                 |

| Compound         | Parent (m/z) | Daughter (m/z) | Dwell (s) | Cone (V) | Collision (V) |
|------------------|--------------|----------------|-----------|----------|---------------|
| Sulfamethoxazole | 254.3        | 156.1          | 0.05      | 30       | 15            |
| Trimethoprim     | 290.9        | 230.0          | 0.05      | 35       | 20            |
| Ciprofloxacin    | 331.9        | 314.2          | 0.05      | 30       | 20            |
| Cephalexin       | 347.9        | 158.0          | 0.05      | 35       | 10            |
| Levofloxacin     | 361.9        | 318.2          | 0.05      | 30       | 20            |
| Amoxicillin      | 365.9        | 114.2          | 0.05      | 20       | 15            |
| Clindamycin      | 425.0        | 126.2          | 0.05      | 35       | 25            |
| Doxycycline      | 445.0        | 428.2          | 0.05      | 30       | 15            |
| Ertapenem        | 476.1        | 432.4          | 0.05      | 25       | 10            |
| Azithromycin     | 749.3        | 158.1          | 0.05      | 40       | 30            |

## **Additional Results**

**Table S1**

| Genus                 | p Value     |
|-----------------------|-------------|
| Peptostreptococcaceae | 0.000120138 |
| Afipia                | 0.000165926 |
| Holospira             | 9.63E-05    |
| Bppunlikevirus        | 0.000553161 |
| Yualikevirus          | 0.000717512 |
| Azoarcus              | 0.00101914  |
| Legionellaceae        | 0.002209625 |
| Methyloversatilis     | 0.006230025 |
| Sphingobium           | 0.009322171 |
| Rickettsiella         | 0.009056738 |
| Myroides              | 0.017005632 |
| Alicyclophilus        | 0.016215851 |
| Burkholderia          | 0.025314864 |
| Acinetobacter         | 0.025614406 |
| Thauera               | 0.034797732 |
| Riemerella            | 0.045239986 |

**Figure S1**

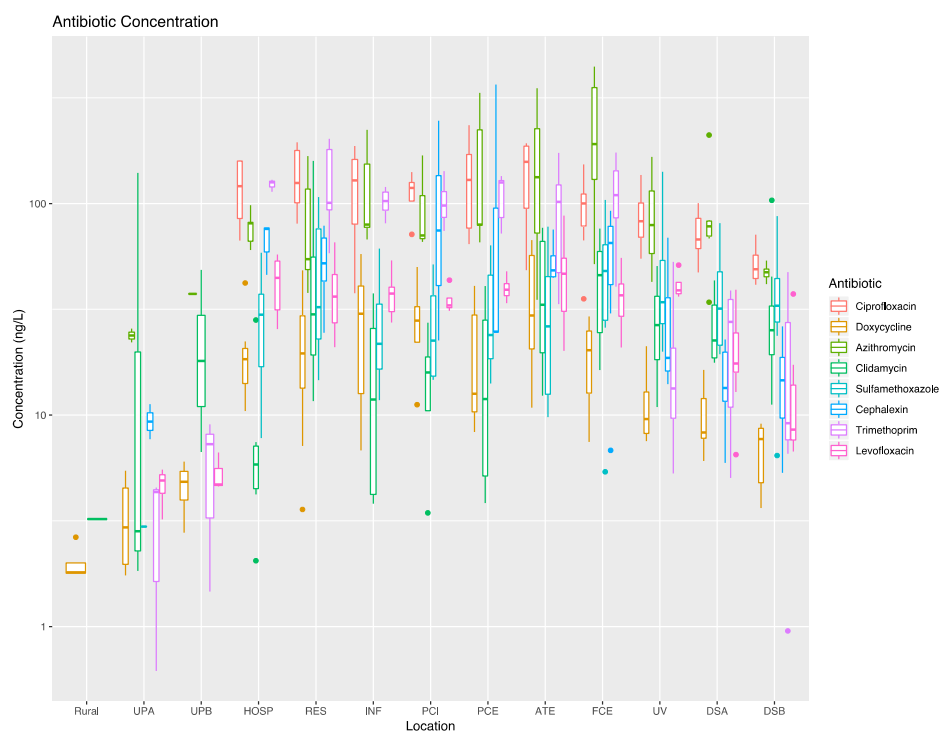

**Figure S2**

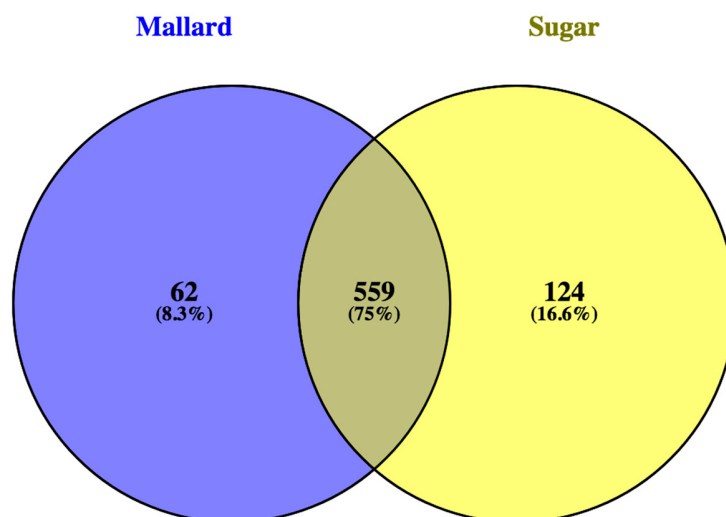

**Figure S3**

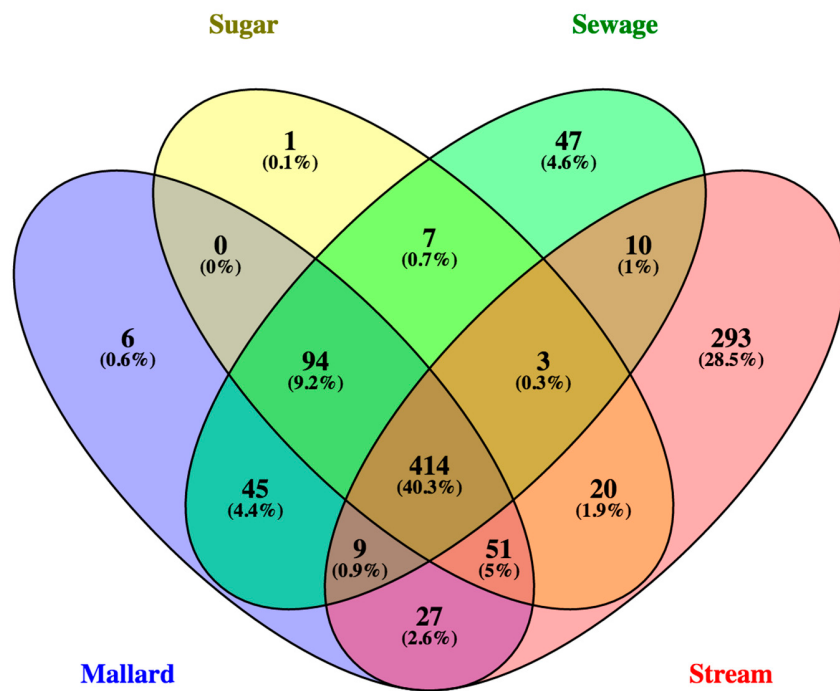

Figure S4

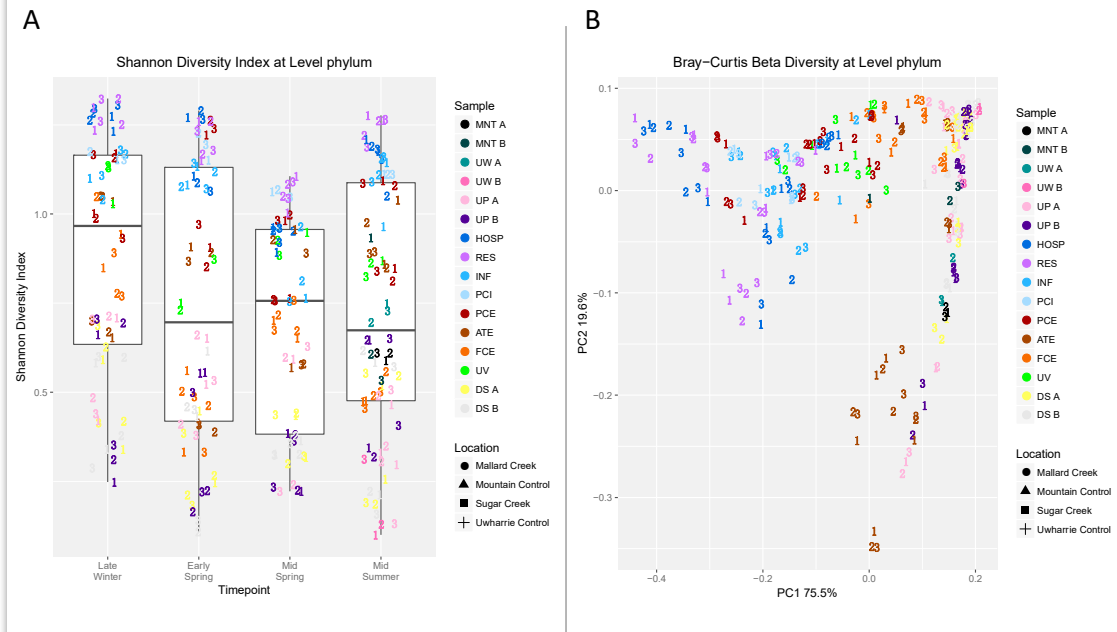

**Figure S5**

A:Actinobacteria noname  
 AA:Hythomicrobium  
 AB:Rhodospirillales noname  
 AC:Rhodospirillales noname  
 AD:Holospiraceae  
 AE:Holospira  
 AF:Sphingomonadaceae  
 AG:Sphingobium  
 AH:Sphingopyxis  
 AI:Burkholderiaceae  
 AJ:Polynucleobacter  
 AK:Burkholderiales noname  
 AL:Burkholderiales noname  
 AM:Thiomonas  
 AN:Comamonadaceae  
 AO:Alcalyphilus  
 AP:Comamonas  
 AQ:Limnobactans  
 AR:Polaromonas  
 AS:Pseudodivorax  
 AT:Variovorax  
 AU:Oxalobacteraceae  
 AV:Methylophilaceae  
 AW:Methylothera  
 AX:Neisseriaceae  
 AY:Rhodocyclaceae  
 AZ:Methyloversatilis  
 Aa:Thauera  
 Ab:Desulfotribionaceae  
 Ac:Desulfotribrio  
 Ad:Campylobacteraceae  
 Ae:Arcobacter  
 Af:Aeromonadaceae  
 Ag:Aeromonas  
 Ah:Enterobacteriaceae  
 Ai:Clostracter  
 Aj:Enterobacter  
 Ak:Escherichia  
 Al:Klebsiella  
 Am:Legionellaceae  
 An:Legionellaceae unclassified  
 Ao:Moraxellaceae  
 Ap:Acinetobacter  
 Aq:Enhydrobacter  
 As:Pseudomonadaceae  
 At:Thiothrix  
 Au:Thiothrix  
 Av:Akkermansia  
 B:Actinobacteria noname  
 C:Actinobacteria noname  
 D:Dermatophilaceae  
 E:Dermatophilaceae unclassified  
 F:Gordonia  
 G:Gordonia  
 H:Intrasporangiaceae  
 I:Tetrasphaera  
 J:Nocardaceae  
 K:Rhodococcus  
 L:Bifidobacteriaceae  
 M:Bifidobacterium  
 N:Coriobacteriaceae  
 O:Collinsella  
 P:Bacteroidaceae  
 Q:Bacteroides  
 R:Porphyromonadaceae  
 S:Parabacteroides  
 T:Trevisanellaceae  
 U:Prevotella  
 V:Vibriaceae  
 W:Vibrio  
 X:Flavobacteriaceae  
 Y:Chryseobacterium  
 Z:Myroides  
 a:Riemerella  
 b:Lactobacillaceae  
 c:Lactobacillus  
 d:Streptococcaceae  
 e:Lactococcus  
 f:Streptococcus  
 g:Eubacteriaceae  
 h:Eubacterium  
 i:Lactinospiraceae  
 j:Blautia  
 k:Dorea  
 l:Peptostreptococcaceae  
 m:Peptostreptococcaceae noname  
 n:Ruminococcaceae  
 o:Faecalibacterium  
 p:Ruminococcus  
 q:Subdoligranulum  
 r:Acidaminococcaceae  
 s:Veillonellaceae  
 t:Dialister  
 u:Caulobacteraceae  
 v:Caulobacter  
 w:Bradyrhizobiaceae  
 x:Altipia  
 y:Rhodospseudomonas  
 z:Hyphomicrobiaceae

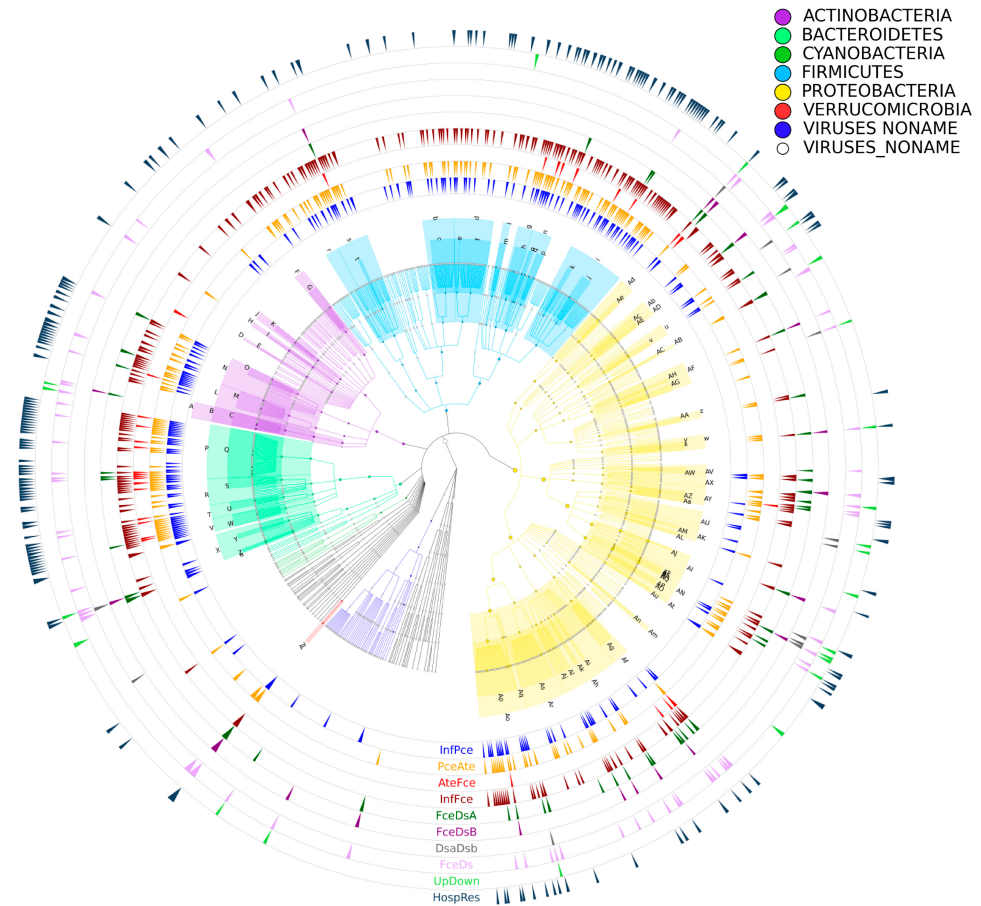

Figure S6



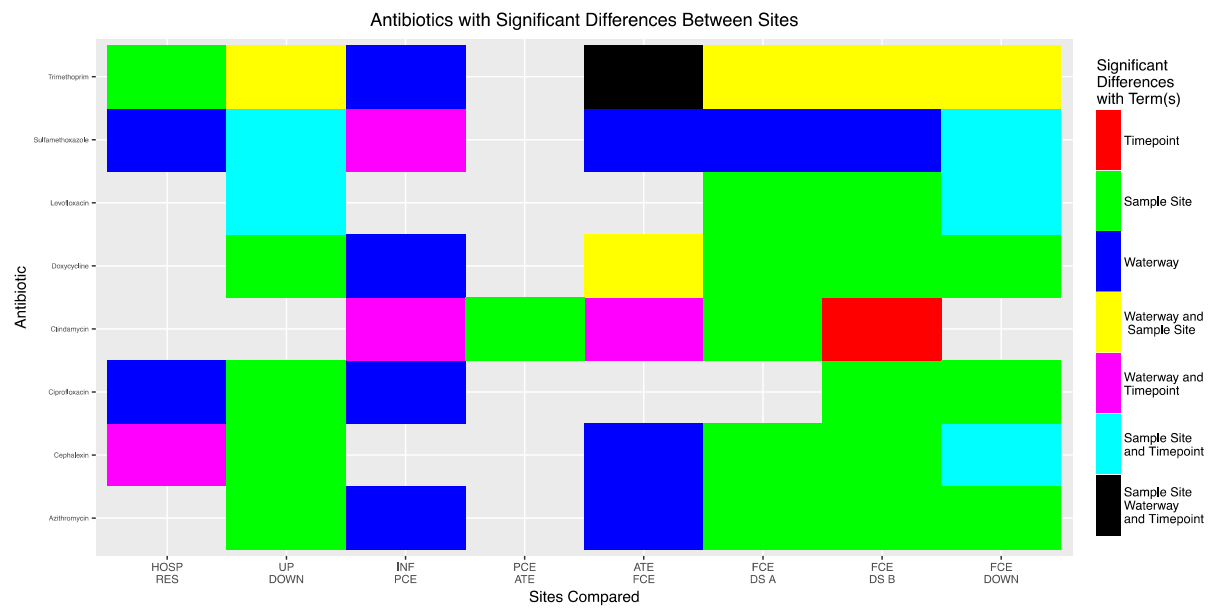

**Figure S8**

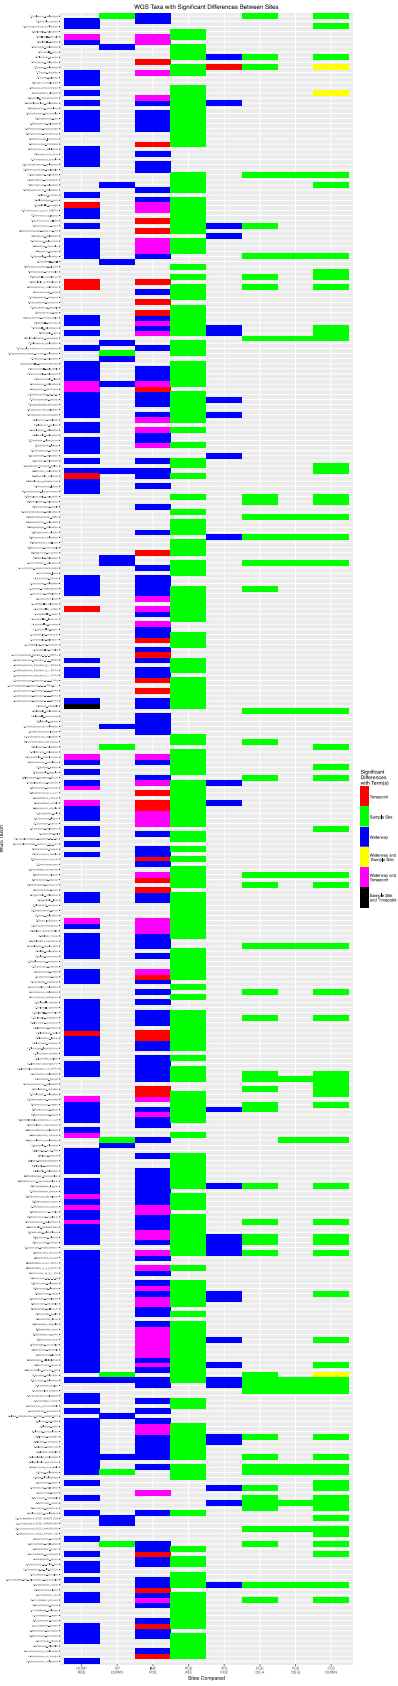

**Figure S9**

## Gene

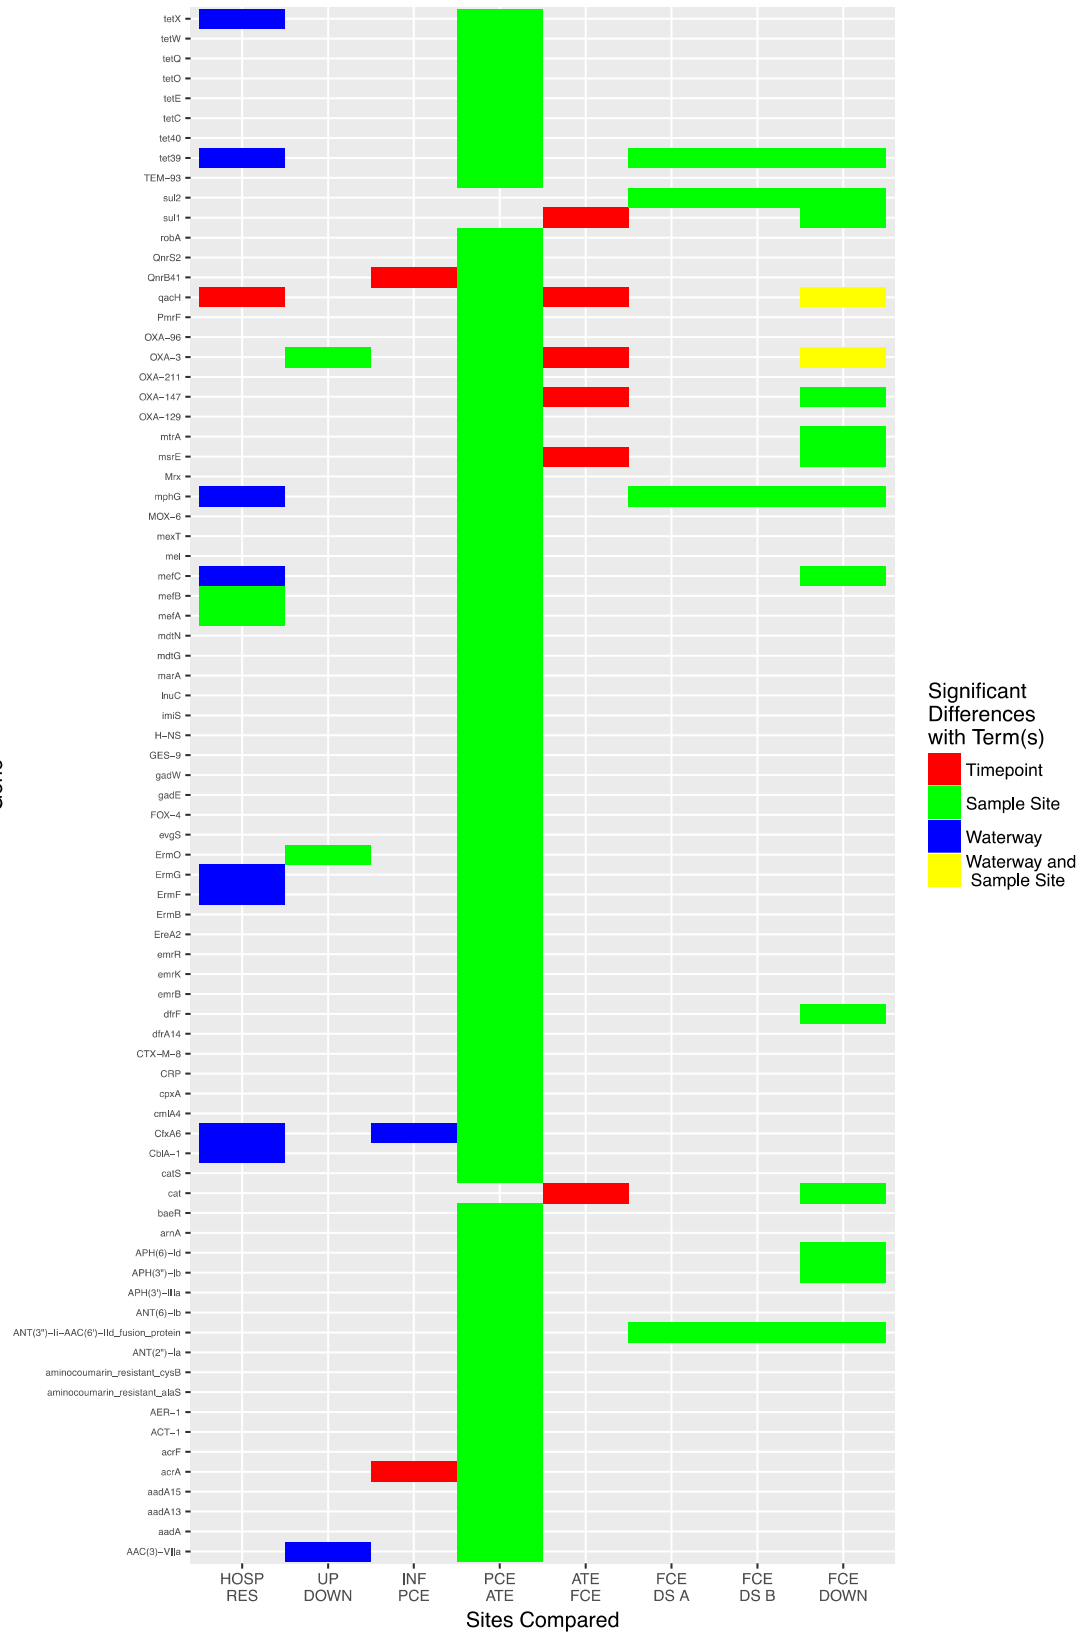

## **Treated water testing procedures and evaluation criteria**

It should be recognized that despite the persistence of limited antibiotics and antibiotic resistance genes ultimately being discharged into local surface waters, this in no way undermines the efficacy and efficiency of the subject wastewater treatment facilities. Currently, the North Carolina wastewater treatment system tests for *Salmonella typhi*, *Vibrio cholerae*, *Shigella dysenteriae*, *E. coli O157:H7*, and *Clostridium perfringens*. For reclamation testing, North Carolina applies fecal coliform measurement limits of <14/100 mL of non-potable water, and values of 3/100 mL for *E. coli*, and 5/100 mL for *Coliphages* and *Clostridium perfringens* in potable sources.

## **Figure Captions**

Figure S1. Concentrations of each antibiotic compound for each sampling location averaged across all four timepoints.

Figure S2. Unique and shared OTUs between Mallard and Sugar Creek treatment facilities from whole-genome shotgun sequencing.

Figure S3. Whole-genome OTUs compared between Mallard and Sugar Creek, stream and sewage samples.

Figure S4. Shannon diversity (A) and Bray-Curtis Beta diversity (B) of all WGS sample replicates. Samples have no significant variance between replicates, demonstrating equivalence utilizing the highest depth replicate.

Figure S5. Species-level taxonomic classification of differentially abundant clades between sampling locations.

Figure S6. Abundance values for antibiotic resistance genes from all timepoints across all sample locations as reported by ShortBRED in RPKM, with red indicating highest abundance

and blue indicating no presence. Sample clustering is based on the Euclidian distance between samples, with overall ARG abundance sorted in decreasing order from left to right. Specific gene terms are listed on the x-axis, with sample names and locations on the y-axis.

Figure S7. Significant differences in antibiotic concentrations between sample site, waterway, and timepoint.

Figure S8. Significant differences in taxa from shotgun sequence analysis between sample site, waterway, and timepoint.

Figure S9. Differentially abundant ARGs in collection sites. ARGs differing with regards to time point, waterway, sample site, and combinations of sample site/time point and waterways are shown. Each colored box indicates a significant abundance difference between the corresponding sites shown on the x-axis, and the significant resistance term on the y-axis. Red, green, and blue indicate substantial differences with regards to timepoint, sample sites, and treatment plant respectively, while yellow shows significant differences at both treatment plant and sample site levels.

File S1. Adjustment values for antibiotic detection and quantification limits.

File S2. Complete linear model statistical results from mass spectrometry data.

File S3. Complete linear model statistical results from taxonomic classification.

File S4. Complete statistical results from mass spectrometry linear models.

File S5. Standard curve calculations for commercial antibiotic standards.

### **Additional Data**

Additional illustrated statistical comparisons for MetaPhlAn2, ShortBRED, and for the mass spectrometry data are available in their entirety from FigShare at

<https://figshare.com/s/3b6b33ed765fb8605ff2>, <https://figshare.com/s/5db6e984875ac4062a04>, and <https://figshare.com/s/1137b9a723c3fa7c0c68> respectively. Heatmaps generated for

visualizing bacterial abundance changes are located at

<https://figshare.com/s/fc22b1db16f31491652d>.

### **Supporting Information References**

1. Price, M. N.; Dehal, P. S.; Arkin, A. P., FastTree 2--approximately maximum-likelihood trees for large alignments. *PloS one* **2010**, *5*, (3), e9490.
2. Wang, Q.; Garrity, G. M.; Tiedje, J. M.; Cole, J. R., Naïve Bayesian classifier for rapid assignment of rRNA sequences into the new bacterial taxonomy. *Appl. Environ. Microbiol.* **2007**, *73*, (16), 5261-7.
3. McDonald, D.; Price, M. N.; Goodrich, J.; Nawrocki, E. P.; DeSantis, T. Z.; Probst, A.; Andersen, G. L.; Knight, R.; Hugenholtz, P., An improved Greengenes taxonomy with explicit ranks for ecological and evolutionary analyses of bacteria and archaea. *ISME J* **2012**, *6*, (3), 610-8.
4. Oliveros, J. C., Venny. An interactive tool for comparing lists with Venn's diagrams. **2007-2015**.
5. Paulson, J. N.; Stine, O. C.; Bravo, H. C.; Pop, M., Differential abundance analysis for microbial marker-gene surveys. *Nat. Methods* **2013**, *10*, (12), 1200-2.
