# Supplementary material for: Microbial Community Composition and Antibiotic Resistance Genes Within a North Carolina Urban Water System
Source: Preprints.org preprint supplement (doi:10.20944/preprints201809.0255.v1), 2018-09-14
Supplement: Supplementary file 3 [file Mass Spec TP1-3.xlsx]

## Sheet: Final Data
	Sample name	Ertapenem (ng/L)	Amoxicillin (ng/L)	Ciprofloxacin (ng/L)	Doxycycline (ng/L)	Azithromycin (ng/L)	Clindamycin (ng/L)	Sulfamethoxazole (ng/L)	Cephalexin (ng/L)	Trimethoprim (ng/L)	Levofloxacin (ng/L)
Sample1	Sugar DSB 2	ND	2.41544	52.9895	8.67173	41.6243	27.4871	36.4828	ND	9.37186	12.8565
Sample2	Sugar UPA 2	ND	4.27221	ND	5.45812	ND	1.83441	2.96853	ND	4.32526	ND
Sample3	Sugar UPB 2	ND	0.967081	ND	ND	ND	<LOQ	<LOQ	ND	ND	ND
Sample4	Sugar DSA 2	ND	1.98344	67.6926	13.5531	75.9173	43.2962	41.6547	22.7657	ND	17.3
Sample5	Sugar RES 2	ND	ND	100.512	16.5461	37.8102	<LOQ	16.3743	ND	82.5182	65.5561
Sample6	Sugar PCE 2	ND	ND	ND	10.7833	ND	6.03422	19.1044	ND	ND	40.8913
Sample7	Sugar UV 2	ND	1.92859	54.9216	7.5237	ND	10.9161	19.9562	18.6498	15.1361	39.8337
Sample8	Sugar FCE 2	ND	4.10834	102.48	19.6359	332.506	55.9534	28.8409	84.6365	142.142	38.8084
Sample9	Sugar HOSP 2	ND	ND	ND	14.2498	81.5323	<LOQ	32.2332	ND	ND	44.5208
Sample10	Sugar ATE 2	ND	3.94044	192.738	31.0844	328.136	64.3759	12.4431	45.3075	112.695	56.4107
Sample11	Sugar INF 2	ND	ND	ND	11.1706	ND	4.31082	18.4931	ND	ND	38.8937
Sample12	Sugar INF 3	ND	ND	ND	37.0657	67.6669	12.8861	16.5656	ND	ND	40.2189
Sample13	Sugar UPB 3	ND	1.06053	ND	6.01941	ND	<LOQ	<LOQ	ND	7.27933	<LOQ
Sample14	Sugar FCE 3	ND	1.25607	125.89	20.8854	159.961	38.3817	25.9083	72.0042	102.567	38.0123
Sample15	Sugar RES 3	ND	ND	80.404	41.2675	ND	39.4279	36.1492	43.03	102.755	27.721
Sample16	Sugar PCE 3	ND	ND	ND	13.6515	79.5249	4.38864	14.1103	24.5666	ND	36.5018
Sample17	Sugar HOSP 3	ND	ND	ND	19.1254	ND	2.04654	18.5708	ND	ND	30.0384
Sample18	Sugar DSB 3	ND	1.36467	ND	8.41527	ND	23.0936	29.6295	ND	0.953485	17.2797
Sample19	Sugar DSA 3	ND	1.77254	63.9437	10.5666	34.1668	22.4193	31.9515	ND	ND	17.751
Sample20	Sugar ATE 3	ND	1.16554	98.9566	28.1417	136.723	30.4011	12.571	44.5571	119.241	42.1517
Sample21	Sugar UPA 3	ND	0.771748	ND	<LOQ	ND	<LOQ	<LOQ	ND	<LOQ	3.21057
Sample22	Sugar UV 3	ND	ND	90.9034	10.8907	42.6126	32.6791	29.9013	13.9913	5.29985	36.323
Sample23	Mallard ATE 3	ND	1.26567	188.293	67.2033	85.0314	76.8861	26.0546	ND	133.092	51.5312
Sample24	Mallard UPB 3	ND	0.992966	ND	<LOQ	ND	6.68851	<LOQ	ND	ND	4.69338
Sample25	Mallard DSB 3	ND	0.707417	45.223	9.10846	49.0442	45.1411	28.9608	18.7201	6.56631	9.21183
Sample26	Mallard INF 3	ND	ND	107.109	24.493	77.7997	10.8851	28.7995	ND	103.953	40.3899
Sample27	Mallard PCI 3	ND	ND	121.047	50.0946	168.716	15.178	15.4788	ND	74.1679	32.543
Sample28	Mallard UPA 3	ND	1.16742	ND	4.24156	22.049	2.82552	<LOQ	ND	0.616281	5.1258
Sample29	Mallard PCE 3	ND	ND	ND	8.32099	ND	11.9085	43.9119	24.7899	72.0947	38.5679
Sample30	Mallard FCE 3	ND	1.53406	106.386	29.2729	444.042	76.1729	47.9093	56.6633	145.412	35.7562
Sample31	Mallard DSA 3	ND	0.525027	100.465	16.3358	83.4755	37.7527	31.7138	11.5394	5.04786	22.0394
Sample32	Mallard HOSP 3	ND	ND	ND	ND	66.3456	ND	57.6501	75.9471	ND	57.3935
Sample33	Mallard RES 3	ND	ND	ND	7.13849	ND	<LOQ	83.4466	52.1988	202.317	34.1193
Sample34	Mallard PCE 2	ND	ND	129.469	28.8066	ND	35.7254	18.4162	ND	ND	33.7897
Sample35	Mallard INF 2	ND	ND	154.718	48.3076	81.4303	37.5936	11.7687	ND	90.3676	31.6162
Sample36	Mallard FCE 2	ND	1.5512	153.145	27.6766	425.805	71.0003	57.3677	65.1437	174.229	51.6951
Sample37	Mallard RES 2	ND	ND	154.86	26.3376	49.3715	159.137	28.97	ND	58.2511	38.662
Sample38	Mallard HOSP 2	ND	ND	ND	18.3831	ND	6.26761	30.1873	ND	ND	32.8925
Sample39	Mallard PCI 2	ND	ND	140.877	27.7025	ND	16.6483	32.7153	22.5265	90.4849	31.0767
Sample40	Mallard ATE 2	ND	0.769803	186.302	58.3147	350.975	72.2013	45.6582	ND	173.522	54.8163
Sample41	Mallard UPA 2	ND	1.55288	ND	<LOQ	ND	<LOQ	<LOQ	7.6899	ND	ND
Sample42	Mallard DSB 2	ND	1.98822	ND	7.0362	47.3607	29.4659	37.9686	14.6089	40.7486	7.69112
Sample43	Mallard UPB 2	ND	1.23932	ND	<LOQ	ND	<LOQ	<LOQ	ND	ND	ND
Sample44	Mallard DSA 2	ND	1.11962	ND	<LOQ	ND	18.6766	20.6571	11.8307	35.2197	6.49928
Sample45	Mallard FCE 1	ND	2.6712	97.881	24.138	135.612	54.8681	48.0117	92.3278	117.055	26.5182
Sample46	Sugar FCE 1	ND	0.645214	66.9629	7.46614	51.7178	16.3242	5.3921	30.239	74.4027	20.8749
Sample47	Mallard INF 1	ND	1.69598	164.015	57.7807	190.017	31.8624	25.4635	ND	101.634	27.3686
Sample48	Sugar HOSP 1	ND	ND	159.267	22.3033	98.2153	7.44804	7.77678	ND	129.541	53.0416
Sample49	Sugar ATE 1	ND	1.41166	84.1965	10.8426	44.9482	12.348	9.78549	51.5266	50.3285	31.3979
Sample50	Mallard ATE 1	ND	2.08002	151.272	20.6386	199.493	36.2753	44.951	75.4391	92.1153	29.6187
Sample51	Sugar UV 1	ND	2.58599	136.508	21.1525	166.37	50.6354	39.037	69.0266	53.0311	37.8871
Sample52	Mallard PCE 1	ND	4.76045	170.66	40.8405	223.046	40.7505	29.8834	365.678	85.9219	44.6109
Sample53	Sugar PCE 1	ND	ND	234.924	32.5562	334.021	22.1287	18.4987	ND	128.387	39.6513
Sample54	Sugar INF 1	ND	ND	187.306	38.5153	223.323	23.9066	16.2276	ND	80.6798	28.6461
Sample55	Mallard PCI 1	ND	1.79247	116.108	28.2089	65.9051	27.3596	14.6716	246.39	105.708	43.4279
Sample56	Sugar RES 1	ND	ND	186.969	48.2927	167.595	22.7321	25.5672	24.4959	98.8194	20.9442
Sample57	Mallard HOSP 1	ND	ND	158.904	42.1068	ND	28.1481	12.8467	77.3673	113.814	25.5038
Sample58	Mallard RES 1	ND	ND	194.96	22.0722	146.047	11.6343	14.6302	68.7043	97.3739	49.82
Sample59	Mallard Downstream B1	ND	9.19275	ND	4.86693	ND	103.609	23.6945	26.2481	47.4321	7.39182
Sample60	Mallard Upstream A1	2.93067	1.30805	ND	<LOQ	25.6207	<LOQ	<LOQ	ND	4.53972	ND
Sample61	Mallard Downstream A1	2.03293	0.832967	58.5235	6.06123	80.4118	18.5468	19.4033	15.2207	35.1683	12.8553
Sample62	Sugar Upstream B1	ND	1.15949	ND	4.46271	ND	<LOQ	<LOQ	ND	1.46191	4.59974
Sample63	Sugar Downstream B1	ND	0.906703	ND	4.55329	ND	11.1953	6.43669	5.32677	8.0308	7.91418
Sample64	Mallard Upstream B1	ND	1.72855	ND	5.23454	ND	48.5984	<LOQ	ND	ND	ND
Sample65	Sugar Downstream A1	2.51773	1.41813	47.2615	7.38969	ND	31.7126	21.625	21.6477	21.5959	17.134
Sample66	Sugar Upstream A1	ND	ND	ND	ND	ND	139.714	ND	ND	ND	4.6915
Sample67	Test	ND	4.14286	77.8532	20.6074	65.6852	4.74762	33.3249	44.5725	37.8318	26.1093
ND= Not Detected
		Ertapenem	Amoxicillin	Ciprofloxacin	Doxycycline	Azithromycin	Clindamycin	Sulfamethoxazole	Cephalexin	Trimethoprim	Levofloxacin
	LOD estimate(ng/L)	0.225	0.0513158	0.404224	0.026	4.57317	0.00688235	0.0173591	0.325	0.0483471	0.0737736
	LOQ (ng/L)	1.95	0.24	15.63	1.95	15.63	1.95	1.95	1.95	1.95	1.95

## Sheet: Standard
Compound name	Parent (m/z)	Daughter (m/z)	Dwell (s)	Cone (V)	Collision (V)	Standard label	factor for conc. adjustment	Mol. Weight	Vendor	Part No.	Storage
Sulfamethoxazole	254.3	156.1	0.05	30	15	Sulfamethoxazole	1	253.28	Sigma	31737-250MG	room temp
Trimethoprim	290.9	230	0.05	35	20	Trimethoprim	1	290.32	Sigma	46984-250MG	4C
Ciprofloxacin	331.9	314.2	0.05	30	20	Ciprofloxacin HCl	0.85882	385.82	Sigma	PHR1044	room temp
Cephalexin	347.9	158	0.05	35	10	Cephalexin	1		USP		4C
Levofloxacin	361.9	318.2	0.05	30	20	Levofloxacin	1	361.37	Sigma	40922-100MG	room
Amoxicillin	365.9	114.2	0.05	20	15	Amoxicillin trihydrate	0.871141	419.45	Sigma	31586-250MG	4C
Clindamycin	425	126.2	0.05	35	25	Clindamycin hydrochloride	0.886372	479.46	Sigma	PHR1159-1G	Freezer -20C
Doxycycline	445	428.2	0.05	30	15	Doxycycline hyclate	0.866437	512.94	Sigma	PHR1145-1G	Freezer -20C
Ertapenem	476.1	432.4	0.05	25	10	Ertapenem sodium	0.955819	497.5	Sigma	SLM1238-10MG	Freezer -80C
Azithromycin	749.3	158.1	0.05	40	30	Azithromycin	0.95409	785.02	Sigma	PHR1088-1G	Freezer -20C

## Sheet: Data (analysis batch and queue)
	Batch	Queue	Ertapenem (ng/L)	Amoxicillin (ng/L)	Ciprofloxacin (ng/L)	Doxycycline (ng/L)	Azithromycin (ng/L)	Clindamycin (ng/L)	Sulfamethoxazole (ng/L)	Cephalexin (ng/L)	Trimethoprim (ng/L)	Levofloxacin (ng/L)
Sample27	1	1	ND	ND	338.577	50.0946	168.716	15.178	15.4788	ND	74.1679	32.543
Sample46	1	2	ND	0.645214	281.716	7.46614	51.7178	16.3242	5.3921	30.239	74.4027	20.8749
Sample64	1	3	ND	1.72855	ND	5.23454	ND	48.5984	<LOQ	ND	ND	ND
Sample26	1	4	ND	ND	324.923	24.493	77.7997	10.8851	28.7995	ND	103.953	40.3899
Sample57	1	5	ND	ND	373.365	42.1068	ND	28.1481	12.8467	77.3673	113.814	25.5038
Sample24	1	6	ND	0.992966	ND	<LOQ	ND	6.68851	<LOQ	ND	ND	4.69338
Sample63	1	7	ND	0.906703	ND	4.55329	ND	11.1953	6.43669	5.32677	8.0308	7.91418
Sample28	1	8	ND	1.16742	ND	4.24156	22.049	2.82552	<LOQ	ND	0.616281	5.1258
Sample59	1	9	ND	9.19275	ND	4.86693	ND	103.609	23.6945	26.2481	47.4321	7.39182
Sample66	1	10	ND	ND	ND	ND	ND	139.714	ND	ND	ND	4.6915
Sample61	1	11	2.03293	0.832967	271.597	6.06123	80.4118	18.5468	19.4033	15.2207	35.1683	12.8553
Sample31	1	12	ND	0.525027	318.211	16.3358	83.4755	37.7527	31.7138	11.5394	5.04786	22.0394
Sample30	1	13	ND	1.53406	324.199	29.2729	444.042	76.1729	47.9093	56.6633	145.412	35.7562
Sample58	1	14	ND	ND	404.221	22.0722	146.047	11.6343	14.6302	68.7043	97.3739	49.82
Sample25	1	15	ND	0.707417	254.552	9.10846	49.0442	45.1411	28.9608	18.7201	6.56631	9.21183
Sample23	1	16	ND	1.26567	398.649	67.2033	85.0314	76.8861	26.0546	ND	133.092	51.5312
Sample48	1	17	ND	ND	373.685	22.3033	98.2153	7.44804	7.77678	ND	129.541	53.0416
Sample65	1	18	2.51773	1.41813	257.266	7.38969	ND	31.7126	21.625	21.6477	21.5959	17.134
Sample60	1	19	2.93067	1.30805	ND	<LOQ	25.6207	<LOQ	<LOQ	ND	4.53972	ND
Sample62	1	20	ND	1.15949	ND	4.46271	ND	<LOQ	<LOQ	ND	1.46191	4.59974
Sample17	2	21	ND		ND	19.1254	ND	2.04654	18.5708	ND	ND	30.0384
Sample18	2	22	ND	1.36467	ND	8.41527	ND	23.0936	29.6295	ND	0.953485	17.2797
Sample19	2	23	ND	1.77254	284.241	10.5666	34.1668	22.4193	31.9515	ND	ND	17.751
Sample20	2	24	ND	1.16554	337.966	28.1417	136.723	30.4011	12.571	44.5571	119.241	42.1517
Sample21	2	25	ND	0.771748	ND	<LOQ	ND	<LOQ	<LOQ	ND	<LOQ	3.21057
Sample22	2	26	ND	ND	326.47	10.8907	42.6126	32.6791	29.9013	13.9913	5.29985	36.323
Sample12	2	27	ND	ND	ND	37.0657	67.6669	12.8861	16.5656	ND	ND	40.2189
Sample15	2	28	ND	ND	310.8	41.2675	ND	39.4279	36.1492	43.03	102.755	27.721
Sample16	2	29	ND	ND	ND	13.6515	79.5249	4.38864	14.1103	24.5666	ND	36.5018
Sample34	2	30	ND	ND	378.408	28.8066	ND	35.7254	18.4162	ND	ND	33.7897
Sample35	2	31	ND	ND	409.14	48.3076	81.4303	37.5936	11.7687	ND	90.3676	31.6162
Sample36	2	32	ND	1.5512	407.283	27.6766	425.805	71.0003	57.3677	65.1437	174.229	51.6951
Sample37	2	33	ND	ND	409.308	26.3376	49.3715	159.137	28.97	ND	58.2511	38.662
Sample38	2	34	ND	ND	ND	18.3831	ND	6.26761	30.1873	ND	ND	32.8925
Sample39	2	35	ND	ND	392.546	27.7025	ND	16.6483	32.7153	22.5265	90.4849	31.0767
Sample40	2	36	ND	0.769803	445.166	58.3147	350.975	72.2013	45.6582	ND	173.522	54.8163
Sample41	2	37	ND	1.55288	ND	<LOQ	ND	<LOQ	<LOQ	7.6899	ND	ND
Sample42	2	38	ND	1.98822	ND	7.0362	47.3607	29.4659	37.9686	14.6089	40.7486	7.69112
Sample43	2	39	ND	1.23932	ND	<LOQ	ND	<LOQ	<LOQ	ND	ND	ND
Sample44	2	40	ND	1.11962	ND	<LOQ	ND	18.6766	20.6571	11.8307	35.2197	6.49928
Sample33	2	41	ND	ND	ND	7.13849	ND	<LOQ	83.4466	52.1988	202.317	34.1193
Sample32	2	42	ND	ND	ND	ND	66.3456		57.6501	75.9471	ND	57.3935
Sample29	2	43	ND	ND	ND	8.32099	ND	11.9085	43.9119	24.7899	72.0947	38.5679
Sample67	2	44	ND	4.14286	306.858	20.6074	65.6852	4.74762	33.3249	44.5725	37.8318	26.1093
Sample1	3	45	ND	2.41544	232.33	8.67173	41.6243	27.4871	36.4828	ND	9.37186	12.8565
Sample2	3	46	ND	4.27221	ND	5.45812	ND	1.83441	2.96853	ND	4.32526	ND
Sample3	3	47	ND	0.967081	ND	ND	ND	<LOQ	<LOQ	ND	ND	ND
Sample4	3	48	ND	1.98344	265.898	13.5531	75.9173	43.2962	41.6547	22.7657	ND	17.3
Sample5	3	49	ND	ND	327.973	16.5461	37.8102	<LOQ	16.3743	ND	82.5182	65.5561
Sample6	3	50	ND	ND	ND	10.7833	ND	6.03422	19.1044	ND	ND	40.8913
Sample7	3	51	ND	1.92859	237.058	7.5237	ND	10.9161	19.9562	18.6498	15.1361	39.8337
Sample8	3	52	ND	4.10834	331.334	19.6359	332.506	55.9534	28.8409	84.6365	142.142	38.8084
Sample9	3	53	ND	ND	ND	14.2498	81.5323	<LOQ	32.2332	ND	ND	44.5208
Sample10	3	54	ND	3.94044	463.381	31.0844	328.136	64.3759	12.4431	45.3075	112.695	56.4107
Sample11	3	55	ND	ND	ND	11.1706	ND	4.31082	18.4931	ND	ND	38.8937
Sample13	3	56	ND	1.06053	ND	6.01941	ND	<LOQ	<LOQ	ND	7.27933	<LOQ
Sample14	3	57	ND	1.25607	369.197	20.8854	159.961	38.3817	25.9083	72.0042	102.567	38.0123
Sample45	3	58	ND	2.6712	323.431	24.138	135.612	54.8681	48.0117	92.3278	117.055	26.5182
Sample47	3	59	ND	1.69598	424.811	57.7807	190.017	31.8624	25.4635	ND	101.634	27.3686
Sample49	3	60	ND	1.41166	298.741	10.8426	44.9482	12.348	9.78549	51.5266	50.3285	31.3979
Sample50	3	61	ND	2.08002	406.878	20.6386	199.493	36.2753	44.951	75.4391	92.1153	29.6187
Sample51	3	62	ND	2.58599	385.318	21.1525	166.37	50.6354	39.037	69.0266	53.0311	37.8871
Sample52	3	63	ND	4.76045	433.945	40.8405	223.046	40.7505	29.8834	365.678	85.9219	44.6109
Sample53	3	64	ND	ND	516.514	32.5562	334.021	22.1287	18.4987	ND	128.387	39.6513
Sample54	3	65	ND	ND	456.259	38.5153	223.323	23.9066	16.2276	ND	80.6798	28.6461
Sample55	3	66	ND	1.79247	353.807	28.2089	65.9051	27.3596	14.6716	246.39	105.708	43.4279
Sample56	3	67	ND	ND	455.814	48.2927	167.595	22.7321	25.5672	24.4959	98.8194	20.9442
Adjusted by a factor according to compound formula (refer to sheet "Standard")
A polynomial curve was used for ciprofloxacin calculation

## Sheet: Ertapenem
Conc. (ng/mL)	Ertapenem_1	Ertapenem_2	Ertapenem_3
1.95312	13.548	16.722	22.13
3.90625	34.319	58.509	27.073
7.8125	65.461	134.682	71.521
15.625	242.566	237.127	158.394
31.25	389.84	513.217	326.831
62.5	1284.36	1059.57
125	2343.24	2457.81	2166.11
250	5548.9	2931.07	4161.38
500	7111.92	9868.6	5510.19
1000	12376.3	11290.1
	Ertapenem Response	Ertapenem (ng/L)	Adjusted Ertapenem (ng/L)
Sample27	ND	ND	ND
Sample46	ND	ND	ND
Sample64	ND	ND	ND
Sample26	ND	ND	ND
Sample57	ND	ND	ND
Sample24	ND	ND	ND
Sample63	ND	ND	ND
Sample28	ND	ND	ND
Sample59	ND	ND	ND
Sample66	ND	ND	ND
Sample61	15.117	2.11764	2.03293
Sample31	ND	ND	ND
Sample30	ND	ND	ND
Sample58	ND	ND	ND
Sample25	ND	ND	ND
Sample23	ND	ND	ND
Sample48	ND	ND	ND
Sample65	21.891	2.62263	2.51773
Sample60	27.661	3.05278	2.93067
Sample62	ND	ND	ND
Sample17	ND	ND	ND
Sample18	ND	ND	ND
Sample19	ND	ND	ND
Sample20	ND	ND	ND
Sample21	ND	ND	ND
Sample22	ND	ND	ND
Sample12	ND	ND	ND
Sample15	ND	ND	ND
Sample16	ND	ND	ND
Sample34	ND	ND	ND
Sample35	ND	ND	ND
Sample36	ND	ND	ND
Sample37	ND	ND	ND
Sample38	ND	ND	ND
Sample39	ND	ND	ND
Sample40	ND	ND	ND
Sample41	ND	ND	ND
Sample42	ND	ND	ND
Sample43	ND	ND	ND
Sample44	ND	ND	ND
Sample33	ND	ND	ND
Sample32	ND	ND	ND
Sample29	ND	ND	ND
Sample67	ND	ND	ND
Sample1	ND	ND	ND
Sample2	ND	ND	ND
Sample3	ND	ND	ND
Sample4	ND	ND	ND
Sample5	ND	ND	ND
Sample6	ND	ND	ND
Sample7	ND	ND	ND
Sample8	ND	ND	ND
Sample9	ND	ND	ND
Sample10	ND	ND	ND
Sample11	ND	ND	ND
Sample13	ND	ND	ND
Sample14	ND	ND	ND
Sample45	ND	ND	ND
Sample47	ND	ND	ND
Sample49	ND	ND	ND
Sample50	ND	ND	ND
Sample51	ND	ND	ND
Sample52	ND	ND	ND
Sample53	ND	ND	ND
Sample54	ND	ND	ND
Sample55	ND	ND	ND
Sample56	ND	ND	ND

## Sheet: Amoxicillin
Conc. (ng/mL)	Amoxicillin_1 (calibrated)	Amoxicillin_2(calibrated)	Amoxicillin_3(calibrated)		Amoxicillin_1	Amoxicillin_2	Amoxicillin_3	Amoxicillin_4	Cl-phenylalanine_1	Cl-phenylalanine_2	Cl-phenylalanine_3	Cl-phenylalanine_4
0.244141	15.1015	17.6181	12.7226					10.055				1766.57
0.488281	25.3879	29.6188	21.3886					16.904				1645.87
0.976562	52.2327	60.9372	44.0046					34.778				1889.26
1.95312	94.5198	110.271	79.6304		125.817	114.18	61.895	62.934	2725.17	3630.23	2197.32	1940.46
3.90625					148.512	107.429	158.073	156.842	2692.44	2666.1	2187.31	1717.75
7.8125	323.729	377.678	272.733		348.097	313.131	382.574	215.548	2828.06	3043.72	2593.28	1760.89
15.625	741.936	865.578	625.061		863.327	696.22	591.564	494.002	2576.9	3379.55	2201.63	1794.27
31.25	1784.16	2081.49	1503.11		1070.12	1254.24	1384.89	1187.94	2829.49	2986.31	2138.02	1855.42
62.5	3057.02	3566.46	2575.45		2760.59	2583.55		2035.45	2468.43	3101.05		1664.7
								Average	2686.75	3134.49	2263.51	1788.91
	Amoxicillin Response	Amoxicillin (ng/L)	Adjusted Amoxicillin (ng/L)
Sample27	ND	ND	ND
Sample46	33.684	0.741625	0.645214
Sample64	91.453	1.98683	1.72855
Sample26	ND	ND	ND
Sample57	ND	ND	ND
Sample24	52.228	1.14134	0.992966
Sample63	47.628	1.04219	0.906703
Sample28	61.531	1.34187	1.16742
Sample59	489.484	10.5664	9.19275
Sample66	ND	ND	ND
Sample61	43.696	0.957433	0.832967
Sample31	27.275	0.603479	0.525027
Sample30	81.082	1.76329	1.53406
Sample58	ND	ND	ND
Sample25	37.001	0.813123	0.707417
Sample23	66.77	1.45479	1.26567
Sample48	ND	ND	ND
Sample65	74.9	1.63003	1.41813
Sample60	69.03	1.50351	1.30805
Sample62	61.108	1.33275	1.15949
Sample17
Sample18	84.057	1.56858	1.36467
Sample19	109.432	2.0374	1.77254
Sample20	71.669	1.3397	1.16554
Sample21	47.17	0.887067	0.771748
Sample22	ND	ND	ND
Sample12	ND	ND	ND
Sample15	ND	ND	ND
Sample16	ND	ND	ND
Sample34	ND	ND	ND
Sample35	ND	ND	ND
Sample36	95.662	1.78299	1.5512
Sample37	ND	ND	ND
Sample38	ND	ND	ND
Sample39	ND	ND	ND
Sample40	47.049	0.884831	0.769803
Sample41	95.766	1.78491	1.55288
Sample42	122.85	2.28531	1.98822
Sample43	76.259	1.42451	1.23932
Sample44	68.812	1.28692	1.11962
Sample33	ND	ND	ND
Sample32	ND	ND	ND
Sample29	ND	ND	ND
Sample67	256.896	4.76191	4.14286
Sample1	107.906	2.77637	2.41544
Sample2	191.322	4.91059	4.27221
Sample3	42.838	1.11159	0.967081
Sample4	88.498	2.27981	1.98344
Sample5	ND	ND	ND
Sample6	ND	ND	ND
Sample7	86.034	2.21677	1.92859
Sample8	183.96	4.72223	4.10834
Sample9	ND	ND	ND
Sample10	176.417	4.52924	3.94044
Sample11	ND	ND	ND
Sample13	47.036	1.21899	1.06053
Sample14	55.821	1.44376	1.25607
Sample45	119.396	3.07034	2.6712
Sample47	75.584	1.9494	1.69598
Sample49	62.811	1.6226	1.41166
Sample50	92.837	2.39083	2.08002
Sample51	115.568	2.9724	2.58599
Sample52	213.256	5.47178	4.76045
Sample53	ND	ND	ND
Sample54	ND	ND	ND
Sample55	79.919	2.06031	1.79247
Sample56	ND	ND	ND

## Sheet: Ciprofloxacin
Conc. (ng/mL)	Ciprofloxacin_1	Ciprofloxacin_2	Ciprofloxacin_3
1.95312
3.90625
7.8125
15.625
31.25
62.5
125		15.255	8.102
250	131.659	74.305	264.013
500	3172.73	2574.36	1986.22
1000	20265.5	15045
	Ciprofloxacin Response	Ciprofloxacin (ng/L)	Adjusted Ciprofloxacin (ng/L)
Sample27	1471.72	393.694	338.577
Sample46	633.288	327.577	281.716
Sample64	ND	ND	ND
Sample26	1248.62	377.818	324.923
Sample57	2102.38	434.145	373.365
Sample24	ND	ND	ND
Sample63	ND	ND	ND
Sample28	ND	ND	ND
Sample59	ND	ND	ND
Sample66	ND	ND	ND
Sample61	509.09	315.81	271.597
Sample31	1143.99	370.013	318.211
Sample30	1237.17	376.975	324.199
Sample58	2736.52	470.025	404.221
Sample25	316.993	295.991	254.552
Sample23	2616.8	463.546	398.649
Sample48	2108.59	434.517	373.685
Sample65	346.146	299.147	257.266
Sample60	ND	ND	ND
Sample62	ND	ND	ND
Sample17	ND	ND	ND
Sample18	ND	ND	ND
Sample19	666.954	330.512	284.241
Sample20	1269.3	392.984	337.966
Sample21	ND	ND	ND
Sample22	1127.67	379.616	326.47
Sample12	ND	ND	ND
Sample15	945.792	361.395	310.8
Sample16	ND	ND	ND
Sample34	1822.59	440.009	378.408
Sample35	2300.43	475.744	409.14
Sample36	2270.15	473.585	407.283
Sample37	2303.18	475.939	409.308
Sample38	ND	ND	ND
Sample39	2036.26	456.448	392.546
Sample40	2923.66	517.635	445.166
Sample41	ND	ND	ND
Sample42	ND	ND	ND
Sample43	ND	ND	ND
Sample44	ND	ND	ND
Sample33	ND	ND	ND
Sample32	ND	ND	ND
Sample29	ND	ND	ND
Sample67	902.077	356.812	306.858
Sample1	377.265	270.151	232.33
Sample2	ND	ND	ND
Sample3	ND	ND	ND
Sample4	566.935	309.183	265.898
Sample5	1007.59	381.364	327.973
Sample6	ND	ND	ND
Sample7	401.915	275.649	237.058
Sample8	1034.78	385.272	331.334
Sample9	ND	ND	ND
Sample10	2373.77	538.816	463.381
Sample11	ND	ND	ND
Sample13	ND	ND	ND
Sample14	1364.72	429.299	369.197
Sample45	971.389	376.082	323.431
Sample47	1928.06	493.966	424.811
Sample49	785.545	347.374	298.741
Sample50	1736.18	473.114	406.878
Sample51	1518.37	448.044	385.318
Sample52	2029.54	504.588	433.945
Sample53	3061.54	600.597	516.514
Sample54	2288.07	530.534	456.259
Sample55	1225.37	411.403	353.807
Sample56	2282.78	530.017	455.814

## Sheet: Doxycycline
Conc. (ng/mL)	Doxycycline_1	Doxycycline_2	Doxycycline_3
1.95312	123.934	271.61	122.838
3.90625	260.828	267.799	222.25
7.8125	737.707	651.013	564.611
15.625		1937.78	1210.45
31.25	4459.58		2716.02
62.5	8647.92	10229.8
125	21397.4	27117.6	18881.1
250	51005.8	55184.1	54675.2
500	129513	137240	118860
1000	241117	262322
	Doxycycline Response	Doxycycline (ng/L)	Adjusted Doxycycline (ng/L)
Sample27	9160.71	57.5801	50.0946
Sample46	780.046	8.58177	7.46614
Sample64	341.318	6.01671	5.23454
Sample26	4127.48	28.1528	24.493
Sample57	7590.31	48.3986	42.1068
Sample24	110.323	<LOQ	<LOQ
Sample63	207.386	5.23366	4.55329
Sample28	146.101	4.87536	4.24156
Sample59	269.047	5.59417	4.86693
Sample66	ND	ND	ND
Sample61	503.844	6.96693	6.06123
Sample31	2523.8	18.7768	16.3358
Sample30	5067.21	33.647	29.2729
Sample58	3651.57	25.3704	22.0722
Sample25	1102.92	10.4695	9.10846
Sample23	12524.2	77.2451	67.2033
Sample48	3697	25.636	22.3033
Sample65	765.017	8.4939	7.38969
Sample60	72.027	<LOQ	<LOQ
Sample62	189.578	5.12955	4.46271
Sample17	3681.68	21.9832	19.1254
Sample18	1015.72	9.67272	8.41527
Sample19	1551.23	12.1455	10.5666
Sample20	5926.01	32.3467	28.1417
Sample21	59.635	<LOQ	<LOQ
Sample22	1631.9	12.518	10.8907
Sample12	8147.38	42.6043	37.0657
Sample15	9193.29	47.4339	41.2675
Sample16	2319.12	15.6914	13.6515
Sample34	6091.52	33.111	28.8066
Sample35	10945.7	55.526	48.3076
Sample36	5810.24	31.8122	27.6766
Sample37	5476.94	30.2731	26.3376
Sample38	3496.91	21.13	18.3831
Sample39	5816.7	31.842	27.7025
Sample40	13436.7	67.0284	58.3147
Sample41	139.01	<LOQ	<LOQ
Sample42	672.447	8.08758	7.0362
Sample43	142.979	<LOQ	<LOQ
Sample44	165.01	<LOQ	<LOQ
Sample33	697.909	8.20516	7.13849
Sample32	ND	ND	ND
Sample29	992.258	9.56436	8.32099
Sample67	4050.59	23.6867	20.6074
Sample1	701.047	9.9675	8.67173
Sample2	127.881	6.27371	5.45812
Sample3	ND	ND	ND
Sample4	1571.67	15.5783	13.5531
Sample5	2105.48	19.0185	16.5461
Sample6	1077.66	12.3946	10.7833
Sample7	496.29	8.64793	7.5237
Sample8	2656.58	22.57	19.6359
Sample9	1695.93	16.3791	14.2498
Sample10	4698.5	35.7292	31.0844
Sample11	1146.74	12.8398	11.1706
Sample13	227.989	6.91886	6.01941
Sample14	2879.44	24.0062	20.8854
Sample45	3459.56	27.7449	24.138
Sample47	9459.94	66.4146	57.7807
Sample49	1088.24	12.4628	10.8426
Sample50	2835.42	23.7226	20.6386
Sample51	2927.07	24.3132	21.1525
Sample52	6438.55	46.9431	40.8405
Sample53	4961	37.421	32.5562
Sample54	6023.84	44.2705	38.5153
Sample55	4185.62	32.424	28.2089
Sample56	7767.7	55.5088	48.2927

## Sheet: Azithromycin
Conc. (ng/mL)	Azithromycin_1	Azithromycin_2	Azithromycin_3
7.8125	13		15.541
15.625			14.123
31.25	45.903	18.76	37.932
62.5	71.627	117.702	105.307
125	217.424	323.846	233.443
250	414.631		588.22
500		1012.76	1036.45
1000	1927.32	2335.21	2467.28
	Azithromycin Response	Azithromycin (ng/L)	Adjusted Azithromycin (ng/L)
Sample27	314.858	177.596	168.716
Sample46	74.913	54.4398	51.7178
Sample64	ND	ND	ND
Sample26	128.403	81.8945	77.7997
Sample57	ND	ND	ND
Sample24	ND	ND	ND
Sample63	ND	ND	ND
Sample28	14.067	23.2095	22.049
Sample59	ND	ND	ND
Sample66	ND	ND	ND
Sample61	133.76	84.644	80.4118
Sample31	140.043	87.8689	83.4755
Sample30	879.508	467.413	444.042
Sample58	268.368	153.734	146.047
Sample25	69.43	51.6255	49.0442
Sample23	143.234	89.5067	85.0314
Sample48	170.272	103.384	98.2153
Sample65	ND	ND	ND
Sample60	21.392	26.9692	25.6207
Sample62	ND	ND	ND
Sample17	ND	ND	ND
Sample18	ND	ND	ND
Sample19	45.763	35.965	34.1668
Sample20	296.852	143.918	136.723
Sample21	ND	ND	ND
Sample22	66.441	44.8553	42.6126
Sample12	127.782	71.2283	67.6669
Sample15	ND	ND	ND
Sample16	156.814	83.7104	79.5249
Sample34	ND	ND	ND
Sample35	161.479	85.7161	81.4303
Sample36	1004.62	448.216	425.805
Sample37	82.989	51.97	49.3715
Sample38	ND	ND	ND
Sample39	ND	ND	ND
Sample40	821.409	369.447	350.975
Sample41	ND	ND	ND
Sample42	78.066	49.8534	47.3607
Sample43	ND	ND	ND
Sample44	ND	ND	ND
Sample33	ND	ND	ND
Sample32	124.547	69.8375	66.3456
Sample29	ND	ND	ND
Sample67	122.93	69.1423	65.6852
Sample1	59.894	43.815	41.6243
Sample2	ND	ND	ND
Sample3	ND	ND	ND
Sample4	148.269	79.913	75.9173
Sample5	50.065	39.8003	37.8102
Sample6	ND	ND	ND
Sample7	ND	ND	ND
Sample8	809.511	350.006	332.506
Sample9	162.739	85.8235	81.5323
Sample10	798.251	345.407	328.136
Sample11	ND	ND	ND
Sample13	ND	ND	ND
Sample14	364.853	168.38	159.961
Sample45	302.104	142.749	135.612
Sample47	442.309	200.018	190.017
Sample49	68.46	47.3139	44.9482
Sample50	466.729	209.992	199.493
Sample51	381.371	175.127	166.37
Sample52	527.426	234.785	223.046
Sample53	813.416	351.601	334.021
Sample54	528.142	235.077	223.323
Sample55	122.467	69.3738	65.9051
Sample56	384.528	176.416	167.595

## Sheet: Clindamycin
Conc. (ng/mL)	Clindamycin_1	Clindamycin_2	Clindamycin_3
1.95312	823.13	933.489	1008.57
3.90625	1965.93	2096.44	1858.87
7.8125	3986.46	3563.06	3756.07
15.625	7514.94	7503.48	6922.25
31.25	14633.5	13632.9	13598.1
62.5	23824.9	27684.1	25780.1
125	56412.4	53250.1	50525.9
250	110876	108074	101942
500	215118	200217	200897
1000	418991	400842	386633
	Clindamycin Response	Clindamycin (ng/L)	Adjusted Clindamycin (ng/L)
Sample27	7483.74	17.0539	15.178
Sample46	8054.15	18.3418	16.3242
Sample64	24115.8	54.605	48.5984
Sample26	5347.34	12.2305	10.8851
Sample57	13938.5	31.6271	28.1481
Sample24	3258.84	7.51518	6.68851
Sample63	5501.69	12.579	11.1953
Sample28	1336.37	3.17474	2.82552
Sample59	51492.8	116.415	103.609
Sample66	69460.6	156.982	139.714
Sample61	9160.29	20.8391	18.5468
Sample31	18718.3	42.4188	37.7527
Sample30	37838.6	85.5875	76.1729
Sample58	5720.16	13.0722	11.6343
Sample25	22395.3	50.7204	45.1411
Sample23	38193.6	86.3889	76.8861
Sample48	3636.83	8.36858	7.44804
Sample65	15712.4	35.6321	31.7126
Sample60	414.857	<LOQ	<LOQ
Sample62	554.902	<LOQ	<LOQ
Sample17	1319.09	2.29949	2.04654
Sample18	11484.8	25.9478	23.0936
Sample19	11159.2	25.1903	22.4193
Sample20	15014.3	34.1585	30.4011
Sample21	191.152	<LOQ	<LOQ
Sample22	16114.6	36.7181	32.6791
Sample12	6554.58	14.4787	12.8861
Sample15	19374.3	44.301	39.4279
Sample16	2450.32	4.93105	4.38864
Sample34	17586	40.1409	35.7254
Sample35	18488.3	42.24	37.5936
Sample36	34623.8	79.7756	71.0003
Sample37	77193.8	178.806	159.137
Sample38	3357.87	7.04226	6.26761
Sample39	8371.73	18.7059	16.6483
Sample40	35203.8	81.125	72.2013
Sample41	140.241	<LOQ	<LOQ
Sample42	14562.6	33.1077	29.4659
Sample43	376.052	<LOQ	<LOQ
Sample44	9351.43	20.985	18.6766
Sample33	230.795	<LOQ	<LOQ
Sample32
Sample29	6082.42	13.3803	11.9085
Sample67	2623.71	5.33441	4.74762
Sample1	12965.1	30.8843	27.4871
Sample2	1288.86	2.06113	1.83441
Sample3	80.869	<LOQ	<LOQ
Sample4	20161	48.6474	43.2962
Sample5	938.366	<LOQ	<LOQ
Sample6	3200.48	6.78002	6.03422
Sample7	5422.57	12.2653	10.9161
Sample8	25922.1	62.869	55.9534
Sample9	835.891	<LOQ	<LOQ
Sample10	29755.8	72.3325	64.3759
Sample11	2416.04	4.84361	4.31082
Sample13	182.541	<LOQ	<LOQ
Sample14	17924	43.1255	38.3817
Sample45	25428.1	61.6495	54.8681
Sample47	14956.6	35.8004	31.8624
Sample49	6074.33	13.8742	12.348
Sample50	16965.2	40.7587	36.2753
Sample51	23501.5	56.8937	50.6354
Sample52	19002.2	45.7871	40.7505
Sample53	10526.2	24.8637	22.1287
Sample54	11335.4	26.8614	23.9066
Sample55	12907.1	30.7411	27.3596
Sample56	10800.8	25.5416	22.7321

## Sheet: Sulfamethoxazole
Conc. (ng/mL)	Sulfamethoxazole_1	Sulfamethoxazole_2	Sulfamethoxazole_3
1.95312	466.036	478.665	346.365
3.90625	1022.58	1080.69	944.487
7.8125	1690.87	1813.3	1856.55
15.625	4123.96	4537.96	3629.7
31.25	8387.99	8851.04	6979.04
62.5	15215.9	17235	15679.2
125	32263.1	34648.1	32301
250	62117.8	68183.9	58670.5
500	118023	127724	110540
1000	227806	251966	221088
	Sulfamethoxazole Response	Sulfamethoxazole (ng/L)
Sample27	3903.5	15.4788
Sample46	1315.26	5.3921
Sample64	103.25	<LOQ
Sample26	7321.61	28.7995
Sample57	3228.12	12.8467
Sample24	127.119	<LOQ
Sample63	1583.3	6.43669
Sample28	199.615	<LOQ
Sample59	6011.65	23.6945
Sample66	ND	ND
Sample61	4910.53	19.4033
Sample31	8069.4	31.7138
Sample30	12225.2	47.9093
Sample58	3685.76	14.6302
Sample25	7362.98	28.9608
Sample23	6617.25	26.0546
Sample48	1927.17	7.77678
Sample65	5480.61	21.625
Sample60	51.974	<LOQ
Sample62	310.827	<LOQ
Sample17	5125.47	18.5708
Sample18	8195.02	29.6295
Sample19	8839.54	31.9515
Sample20	3460.08	12.571
Sample21	40.643	<LOQ
Sample22	8270.47	29.9013
Sample12	4568.86	16.5656
Sample15	10004.7	36.1492
Sample16	3887.35	14.1103
Sample34	5082.55	18.4162
Sample35	3237.4	11.7687
Sample36	15894.3	57.3677
Sample37	8011.98	28.97
Sample38	8349.84	30.1873
Sample39	9051.55	32.7153
Sample40	12644.1	45.6582
Sample41	79.825	<LOQ
Sample42	10509.7	37.9686
Sample43	131.127	<LOQ
Sample44	5704.56	20.6571
Sample33	23133	83.4466
Sample32	15972.7	57.6501
Sample29	12159.4	43.9119
Sample67	9220.75	33.3249
Sample1	9091.06	36.4828
Sample2	398.138	2.96853
Sample3	79.06	<LOQ
Sample4	10432.5	41.6547
Sample5	3875.32	16.3743
Sample6	4583.46	19.1044
Sample7	4804.4	19.9562
Sample8	7108.91	28.8409
Sample9	7988.81	32.2332
Sample10	2855.66	12.4431
Sample11	4424.89	18.4931
Sample13	86.601	<LOQ
Sample14	6348.26	25.9083
Sample45	12081.4	48.0117
Sample47	6232.89	25.4635
Sample49	2166.32	9.78549
Sample50	11287.6	44.951
Sample51	9753.57	39.037
Sample52	7379.31	29.8834
Sample53	4426.35	18.4987
Sample54	3837.26	16.2276
Sample55	3433.69	14.6716
Sample56	6259.77	25.5672

[truncated: 3 more sheets: Cephalexin, Trimethoprim, Levofloxacin]
