# Supplementary material for: Microbial Community Composition and Antibiotic Resistance Genes Within a North Carolina Urban Water System
Source: Preprints.org preprint supplement (doi:10.20944/preprints201809.0255.v1), 2018-09-14
Supplement: Supplementary file 4 [file Mass spec TP4.xlsx]

## Sheet: Data
Sample name	Sample	Ertapenem (ng/L)	Amoxicillin (ng/L)	Ciprofloxacin (ng/L)	Doxycycline (ng/L)	Azithromycin (ng/L)	Clindamycin (ng/L)	Sulfamethoxazole (ng/L)	Cephalexin (ng/L)	Trimethoprim (ng/L)	Levofloxacin (ng/L)
Mallard UPA 4	S7	ND	1.19785	ND	1.74637	ND	ND	<LOQ	ND	ND	<LOQ
Mallard PCI 4	S8	ND	ND	71.5226	11.1954	70.6418	3.44505	51.5515	ND	142.478	33.4735
Mallard FCE 4	S9	ND	2.10045	35.4317	12.0615	228.476	24.7622	88.0151	ND	89.7443	30.2915
Mallard DSB 4	S10	ND	2.11746	41.3297	3.63766	53.7289	19.5995	69.809	9.67611	23.9892	6.71835
Mallard PCE4	S11	ND	ND	64.3306	11.6706	78.9595	3.83557	63.4179	ND	134.782	36.7584
Mallard HOSP 4	S12	ND	ND	91.9582	10.4434	80.6282	4.21199	58.5485	45.9937	125.904	53.9879
Mallard RES 4	S13	ND	ND	ND	3.57824	60.4259	<LOQ	107.487	78.5229	178.874	26.0024
Mallard DSA 4	S14	ND	ND	88.8984	8.26299	210.851	22.6746	70.6301	5.93696	38.7832	33.3044
Mallard INF 4	S15	ND	ND	37.6982	6.80616	ND	3.80885	61.2705	ND	116.488	36.1512
Sugar DSA 4	S16	ND	1.40518	81.5736	8.16359	68.329	17.6823	80.7781	ND	8.6861	39.1623
Sugar PCE 4	S17	ND	ND	76.6118	9.17556	65.5317	<LOQ	52.5129	ND	125.724	47.8542
Sugar UV 4	S18	ND	ND	74.9526	8.42643	79.0957	21.6882	141.499	ND	11.7807	51.1572
Sugar INF 4	S19	ND	ND	72.497	13.1625	77.0012	3.95102	52.5282	ND	119.889	53.8549
Sugar UPB 4	S20	ND	1.75065	ND	2.78075	37.3925	<LOQ	<LOQ	ND	9.04378	6.65119
Sugar FCE 4	S21	ND	1.48499	82.4586	12.9356	114.918	23.883	103.986	6.8088	40.4355	55.3872
Sugar ATE 4	S22	ND	1.67253	163.794	20.3122	129.597	20.4769	77.7931	ND	38.7962	87.7314
Sugar RES 4	S23	ND	ND	101.3	17.3685	48.5584	<LOQ	73.5563	ND	183.928	45.0268
Sugar DSB 4	S24	ND	ND	71.2458	8.65637	45.1025	18.4764	87.2531	ND	8.93175	37.382
Sugar UPA 4	S25	ND	2.03443	ND	2.04594	<LOQ	<LOQ	<LOQ	11.267	ND	5.52455
Sugar HOSP 4	S26	ND	ND	66.8592	13.9404	60.2857	5.43074	29.448	ND	ND	ND
Mallard ATE 4	S1	ND	1.2961	48.3936	56.3301	35.0614	17.485	26.4412	ND	33.4548	20.1322
Uwharrie B	S2	ND	1.289	ND	1.78753	ND	<LOQ	ND	ND	ND	ND
Uwharrie A	S3	ND	2.26671	ND	2.64572	ND	3.22209	<LOQ	ND	<LOQ	ND
Mountains B	S4	ND	2.84463	ND	1.82191	ND	<LOQ	ND	ND	ND	ND
Mountains A	S5	ND	4.77847	ND	1.78596	ND	<LOQ	<LOQ	ND	ND	ND
Mallard UPB 4	S6	ND	2.36081	ND	ND	ND	<LOQ	ND	ND	ND	ND
ND= Not Detected
		Ertapenem	Amoxicillin	Ciprofloxacin	Doxycycline	Azithromycin	Clindamycin	Sulfamethoxazole	Cephalexin	Trimethoprim	Levofloxacin
	LOD estimate(ng/L)	0.225	0.0513158	0.404224	0.026	4.57317	0.00688235	0.0173591	0.325	0.0483471	0.0737736
	LOQ (ng/L)	1.95	0.24	15.63	1.95	15.63	1.95	1.95	1.95	1.95	1.95

## Sheet: Standard
Compound name	Parent (m/z)	Daughter (m/z)	Dwell (s)	Cone (V)	Collision (V)	Standard label	factor for conc. adjustment	Mol. Weight	Vendor	Part No.	Storage
Sulfamethoxazole	254.3	156.1	0.05	30	15	Sulfamethoxazole	1	253.28	Sigma	31737-250MG	room temp
Trimethoprim	290.9	230	0.05	35	20	Trimethoprim	1	290.32	Sigma	46984-250MG	4C
Ciprofloxacin	331.9	314.2	0.05	30	20	Ciprofloxacin HCl	0.85882	385.82	Sigma	PHR1044	room temp
Cephalexin	347.9	158	0.05	35	10	Cephalexin	1		USP		4C
Levofloxacin	361.9	318.2	0.05	30	20	Levofloxacin	1	361.37	Sigma	40922-100MG	room
Amoxicillin	365.9	114.2	0.05	20	15	Amoxicillin trihydrate	0.871141	419.45	Sigma	31586-250MG	4C
Clindamycin	425	126.2	0.05	35	25	Clindamycin hydrochloride	0.886372	479.46	Sigma	PHR1159-1G	Freezer -20C
Doxycycline	445	428.2	0.05	30	15	Doxycycline hyclate	0.866437	512.94	Sigma	PHR1145-1G	Freezer -20C
Ertapenem	476.1	432.4	0.05	25	10	Ertapenem sodium	0.955819	497.5	Sigma	SLM1238-10MG	Freezer -80C
Azithromycin	749.3	158.1	0.05	40	30	Azithromycin	0.95409	785.02	Sigma	PHR1088-1G	Freezer -20C

## Sheet: Ert
Conc. (ng/mL)	Ertapenem
1.95312	45.678
3.90625	123.002
7.8125	197.832
15.625	672.494
31.25
62.5	2797.14
125	4665.96
250	10495.3
500	20171.7
1000	40960.9
	Ertapenem Response	Ertapenem (ng/L)
S7	ND	ND
S8	ND	ND
S9	ND	ND
S10	ND	ND
S11	ND	ND
S12	ND	ND
S13	ND	ND
S14	ND	ND
S15	ND	ND
S16	ND	ND
S17	ND	ND
S18	ND	ND
S19	ND	ND
S20	ND	ND
S21	ND	ND
S22	ND	ND
S23	ND	ND
S24	ND	ND
S25	ND	ND
S26	ND	ND
S1	ND	ND
S2	ND	ND
S3	ND	ND
S4	ND	ND
S5	ND	ND
S6	ND	ND

## Sheet: Amo
Conc. (ng/mL)	Amoxicillin
0.24	12.933
0.49
0.98	51.417
1.95312	179.9
3.90625	270.431
7.8125	619.237
15.625	1366.84
31.25	2779.28
62.5	5423.6
125	10379.5
250	20535.1
500	36697.8
1000	66288.7
	Amoxicillin Response	Amoxicillin (ng/L)	Adjusted Amoxicillin (ng/L)
S7	90.988	1.37684	1.19785
S8	ND	ND	ND
S9	182.114	2.41431	2.10045
S10	183.831	2.43386	2.11746
S11	ND	ND	ND
S12	ND	ND	ND
S13	ND	ND	ND
S14	ND	ND	ND
S15	ND	ND	ND
S16	111.92	1.61515	1.40518
S17	ND	ND	ND
S18	ND	ND	ND
S19	ND	ND	ND
S20	146.798	2.01224	1.75065
S21	119.977	1.70688	1.48499
S22	138.911	1.92245	1.67253
S23	ND	ND	ND
S24	ND	ND	ND
S25	175.449	2.33843	2.03443
S26	ND	ND	ND
S1	100.907	1.48977	1.2961
S2	100.19	1.48161	1.289
S3	198.9	2.60542	2.26671
S4	257.246	3.26969	2.84463
S5	452.486	5.49249	4.77847
S6	208.4	2.71358	2.36081

## Sheet: Cip
Conc. (ng/mL)	Ciprofloxacin (calibrated)										Cl-Phenylalanine			Cl-Phenylalanine	Ciprofloxacin_13Sep2016
15.625	62.3811									W4_20Sep2016	4530.04		W4_13Sep2016	3503.7	46.162
31.25	147.434									W5_20Sep2016	4677.84		W5_13Sep2016	3488.01	109.101
62.5	571.982									W6_20Sep2016	4929.06		W6_13Sep2016	3337.37	423.267
125	1966.01									W7_20Sep2016	4244.29		W7_13Sep2016	3456.3	1454.85
250	5760.97									W8_20Sep2016	4689.52		W8_13Sep2016	3383.87	4263.12
500	13845.3									W9_20Sep2016	4605.56		W9_13Sep2016	3289.57	10245.5
1000	36529.1									W10_20Sep2016	4281.53		W10_13Sep2016	3217.83	27031.5
										Average	4565.41			3382.38
										factor				0.740871
	Ciprofloxacin Response	Ciprofloxacin (ng/L)	Adjusted Ciprofloxacin (ng/L)
S7	ND	ND	ND
S8	1161.26	83.1658	71.5226
S9	190.943	41.1996	35.4317
S10	345.635	48.0577	41.3297
S11	963.372	74.803	64.3306
S12	1735.82	106.928	91.9582
S13	ND	ND	ND
S14	1648.63	103.37	88.8984
S15	250.211	43.8351	37.6982
S16	1441.57	94.853	81.5736
S17	1302.64	89.0835	76.6118
S18	1256.42	87.1542	74.9526
S19	1188.24	84.2988	72.497
S20	ND	ND	ND
S21	1466.47	95.8821	82.4586
S22	3899.83	190.459	163.794
S23	2004.51	117.79	101.3
S24	1153.6	82.844	71.2458
S25	ND	ND	ND
S26	1032.69	77.7433	66.8592
S1	532.902	56.2717	48.3936
S2	ND	ND	ND
S3	ND	ND	ND
S4	ND	ND	ND
S5	ND	ND	ND
S6	ND	ND	ND

## Sheet: Dox
Conc. (ng/mL)	Doxycycline
0.12	18.171
0.24	73.433
0.49	46.708
0.98	70.743
1.95312	243.253
3.90625	462.822
7.8125	1571.54
15.625	2574.51
31.25	6601.75
62.5
125	27587.2
250	64422.6
500	153581
1000	345621
	Doxycycline Response	Doxycycline (ng/L)	Adjusted Doxycycline (ng/L)
S7	90.613	2.00732	1.74637
S8	2513.58	12.8683	11.1954
S9	2735.67	13.8638	12.0615
S10	575.589	4.18122	3.63766
S11	2635.43	13.4144	11.6706
S12	2320.75	12.0039	10.4434
S13	560.351	4.11292	3.57824
S14	1761.64	9.49769	8.26299
S15	1388.07	7.82317	6.80616
S16	1736.15	9.38344	8.16359
S17	1995.64	10.5466	9.17556
S18	1803.55	9.68556	8.42643
S19	3017.99	15.1293	13.1625
S20	355.854	3.19626	2.78075
S21	2959.82	14.8685	12.9356
S22	4851.36	23.3473	20.3122
S23	4096.52	19.9638	17.3685
S24	1862.51	9.94985	8.65637
S25	167.43	2.35165	2.04594
S26	3217.46	16.0234	13.9404
S1	14087.3	64.7472	56.3301
S2	101.167	2.05463	1.78753
S3	321.23	3.04106	2.64572
S4	109.983	2.09415	1.82191
S5	100.766	2.05283	1.78596
S6	ND	ND	ND

## Sheet: Azi
Conc. (ng/mL)	Azithromycin (calibrated)													Cl-Phenylalanine			Cl-Phenylalanine	Azithromycin _13Sep2016
15.625	23.9018												E4_20Sep2016	4195.79		E4_13Sep2016	3361	20.605
31.25													E5_20Sep2016	3939.87		E5_13Sep2016	3468.81
62.5	97.6024												E6_20Sep2016	4382.53		E6_13Sep2016	3466.81	84.14
125	303.563												E7_20Sep2016	4241.24		E7_13Sep2016	3646.72	261.692
250	752.123												E8_20Sep2016	3979.95		E8_13Sep2016	3288.31	648.382
500	1590.04												E9_20Sep2016	3760.87		E9_13Sep2016	3649.08	1370.72
1000	3537.47												E10_20Sep2016	3547.26		E10_13Sep2016	3305.29	3049.54
													Average	4006.79			3455.15
													factor	1.15966
	Azithromycin Response	Azithromycin (ng/L)	Adjusted Azithromycin (ng/L)
S7	ND	ND	ND
S8	167.427	74.3598	70.6418
S9	719.031	240.501	228.476
S10	108.319	56.5567	53.7289
S11	196.496	83.1153	78.9595
S12	202.328	84.8718	80.6282
S13	131.724	63.6062	60.4259
S14	657.437	221.949	210.851
S15	ND	ND	ND
S16	159.344	71.9252	68.329
S17	149.568	68.9808	65.5317
S18	196.972	83.2586	79.0957
S19	189.652	81.0539	77.0012
S20	51.226	39.3606	37.3925
S21	322.164	120.966	114.918
S22	373.465	136.418	129.597
S23	90.249	51.1141	48.5584
S24	78.171	47.4763	45.1025
S25	13.354	<LOQ	<LOQ
S26	131.234	63.4586	60.2857
S1	43.079	36.9067	35.0614
S2	ND	ND	ND
S3	ND	ND	ND
S4	ND	ND	ND
S5	ND	ND	ND
S6	ND	ND	ND

## Sheet: Cli
Conc. (ng/mL)	Clindamycin
1.95312	1457.66
3.90625	2395.87
7.8125	5401.27
15.625	11605.4
31.25
62.5	49825
125	109570
250	220682
500	444687
1000	872740
	Clindamycin Response	Clindamycin (ng/L)	Adjusted Clindamycin (ng/L)
S7	ND	ND	ND
S8	1776.7	3.87084	3.44505
S9	22761.8	27.8227	24.7622
S10	17679.6	22.0219	19.5995
S11	2161.14	4.30963	3.83557
S12	2531.7	4.73257	4.21199
S13	474.272	<LOQ	<LOQ
S14	20706.8	25.4771	22.6746
S15	2134.84	4.27961	3.80885
S16	15792.2	19.8677	17.6823
S17	1226.76	<LOQ	<LOQ
S18	19735.8	24.3688	21.6882
S19	2274.79	4.43935	3.95102
S20	1106.46	<LOQ	<LOQ
S21	21896.3	26.8348	23.883
S22	18543.3	23.0078	20.4769
S23	1038.63	<LOQ	<LOQ
S24	16574	20.76	18.4764
S25	707.758	<LOQ	<LOQ
S26	3731.47	6.10195	5.43074
S1	15598	19.646	17.485
S2	70.601	<LOQ	<LOQ
S3	1557.22	3.62033	3.22209
S4	252.888	<LOQ	<LOQ
S5	227.99	<LOQ	<LOQ
S6	210.192	<LOQ	<LOQ

## Sheet: Sul
Conc. (ng/mL)	Sulfamethoxazole
1.95312	812.637
3.90625	1459.15
7.8125	3039.08
15.625	6146.59
31.25	12220.1
62.5	24109.9
125	46785.2
250	94385.6
500	187268
1000	371086
	Sulfamethoxazole Response	Sulfamethoxazole (ng/L)
S7	413.726	<LOQ
S8	19590.3	51.5515
S9	33315.9	88.0151
S10	26462.8	69.809
S11	24057	63.4179
S12	22224.1	58.5485
S13	40645.5	107.487
S14	26771.8	70.6301
S15	23248.7	61.2705
S16	30591.8	80.7781
S17	19952.1	52.5129
S18	53448.3	141.499
S19	19957.9	52.5282
S20	687.804	<LOQ
S21	39327.7	103.986
S22	29468.1	77.7931
S23	27873.3	73.5563
S24	33029.1	87.2531
S25	730.552	<LOQ
S26	11270.1	29.448
S1	10138.2	26.4412
S2	ND	ND
S3	309.36	<LOQ
S4	ND	ND
S5	99.011	<LOQ
S6	ND	ND

## Sheet: Cep
Conc. (ng/mL)	Cephalexin
1.95312	13.425
3.90625	19.113
7.8125	26.198
15.625	112.895
31.25	148.751
62.5	309.166
125	687.357
250	1345.23
500	2580.24
1000	5009.87
	Cephalexin Response	Cephalexin (ng/L)
S7	ND	ND
S8	ND	ND
S9	ND	ND
S10	46.552	9.67611
S11	ND	ND
S12	243.168	45.9937
S13	419.275	78.5229
S14	26.309	5.93696
S15	ND	ND
S16	ND	ND
S17	ND	ND
S18	ND	ND
S19	ND	ND
S20	ND	ND
S21	31.029	6.8088
S22	ND	ND
S23	ND	ND
S24	ND	ND
S25	55.165	11.267
S26	ND	ND
S1	ND	ND
S2	ND	ND
S3	ND	ND
S4	ND	ND
S5	ND	ND
S6	ND	ND

[truncated: 2 more sheets: Tri, Lev]
